# Supplementary material
Source: PubMed Central journal article supplement (PMC2542904)
Supplement: NIHMS51143-supplement-supT.pdf [file NIHMS51143-supplement-supT.pdf]

Supplementary Table 1. Multiple myeloma genetic anomalies

| MM name | Genetic Anomalies |              |                    |   |   | Mutations    |              |              | other?          |
|---------|-------------------|--------------|--------------------|---|---|--------------|--------------|--------------|-----------------|
|         | Translocations    |              | IRF4 translocation |   |   | ras mutation | p18 mutation | p53 mutation |                 |
| ANBL6   |                   |              | +                  |   |   | -            | +            | m            | il6 dependent   |
| EJM     |                   |              | +                  |   |   | k12          | +            | m            |                 |
| H929    |                   | "+"not to Ig |                    | + |   | n13          | +            | n            |                 |
| JIM3    |                   |              |                    | + |   | -            | +            | m            |                 |
| KMS12   | +                 | +            |                    |   |   | -            | o/m          | m            |                 |
| L363    |                   | "+"not to Ig |                    |   |   | n61          | +            | m            | NIK             |
| LP1     |                   | +            |                    | + |   | -            | +            | m            |                 |
| OCIMy5  |                   | +            | +                  |   |   | -            | o            | n            |                 |
| SKMM1   |                   | +            | +                  |   | + | n12          | +            | m            | 10q22           |
| UTMC2   |                   | mutated      |                    |   | + | -            | +            | m            |                 |
| U266    | +                 | +            |                    |   |   |              |              | m            | MYCL1 inversion |
| 8226    |                   | +            | +                  |   |   | k12          |              | m            | 1p13            |
| JJN3    |                   | +            | +                  |   |   | -            |              | n            |                 |

Key '+' translocation positive to an Ig locus

-' no mutation '+' wildtype m-mutated  
n#-mutation m mutated n-normal  
o deleted

Unpublished results courtesy of Dr. Mike Keuhl.





|           |                                                                                                  |        |       |   |   |   |   |   |   |        |
|-----------|--------------------------------------------------------------------------------------------------|--------|-------|---|---|---|---|---|---|--------|
| SETBP1    | SET binding protein 1                                                                            | 435458 | 26040 | X | 0 | 0 | 0 | 1 |   |        |
| SIRT3     | sirtuin (silent mating type information regulation 2 homolog) 3 (S. cerevisiae)                  | 592292 | 25010 | X | 0 | 0 | 0 | 1 |   |        |
| SKP2      | S-phase kinase-associated protein 2 (p45)                                                        | 23348  | 6502  | X | 0 | 0 | 0 | 0 |   |        |
| SLAMF7    | SLAM family member 7                                                                             | 517265 | 57823 | X | 1 | 1 | 1 | 1 | X | X      |
| SLC12A4   | solute carrier family 12 (potassium/chloride transporters), member 4                             | 10094  | 4560  | X | 0 | 0 | 0 | 0 |   |        |
| SLC25A37  | solute carrier family 25, member 37                                                              | 122514 | 51312 | X | 0 | 0 | 0 | 0 |   |        |
| SLC2A1    | solute carrier family 2 (facilitated glucose transporter), member 1                              | 473721 | 6513  | X | 0 | 0 | 0 | 0 |   |        |
| SLC11A1   | solute carrier family 31 (copper transporters), member 1                                         | 532315 | 1317  | X | 1 | 0 | 0 | 0 |   |        |
| SLC37A4   | solute carrier family 37 (glycerol-6-phosphate transporter), member 4                            | 132760 | 2542  | X | 1 | 0 | 0 | 0 | X | X      |
| SLC38A2   | solute carrier family 38, member 2                                                               | 221847 | 54407 | X | 1 | 0 | 1 | 1 |   |        |
| SLC3A2    | solute carrier family 3 (anion exchangers of dibasic and neutral amino acid transport), member 2 | 903769 | 4500  | X | 1 | 0 | 1 | 1 |   |        |
| SMOC2     | SPARC related modular calcium binding 2                                                          | 487200 | 64094 | X | 0 | 0 | 0 | 0 |   | MvcPET |
| SNRK      | SNF related kinase                                                                               | 476052 | 54861 | X | 0 | 0 | 0 | 0 |   |        |
| SNX9      | sorting nexin 9                                                                                  | 191213 | 5409  | X | 0 | 0 | 0 | 0 |   |        |
| SORT1     | sortilin 1                                                                                       | 485195 | 6272  | X | 1 | 1 | 0 | 0 |   |        |
| SP3       | Su3 transcription factor                                                                         | 531587 | 6670  | X | 0 | 0 | 0 | 0 |   |        |
| SPATS2    | spermatogenesis associated, serine-rich 2                                                        | 146679 | 65244 | X | 1 | 1 | 0 | 0 |   |        |
| SPFH1     | SPFH domain family, member 1                                                                     | 150087 | 10613 | X | 0 | 0 | 0 | 0 |   |        |
| SOLE      | squalene epoxidase                                                                               | 71465  | 6713  | X | 0 | 0 | 1 | 0 | X |        |
| SREBF2    | sterol regulatory element binding transcription factor 2                                         | 443258 | 6721  | X | 0 | 0 | 0 | 0 |   |        |
| SRPK1     | SFRS protein kinase 1                                                                            | 443861 | 6732  | X | 0 | 0 | 0 | 1 |   |        |
| SSR1      | signal sequence receptor, alpha (translocon-associated protein alpha)                            | 114033 | 6745  | X | 1 | 1 | 0 | 0 |   |        |
| ST3GAL1   | ST3 beta-galactosidase alpha-2,3-sialyltransferase 1                                             | 584803 | 6482  | X | 0 | 0 | 1 | 0 |   |        |
| ST6GAL1   | ST6 beta-galactosidase alpha-2,6-sialyltransferase 1                                             | 207459 | 6480  | X | 0 | 0 | 0 | 1 |   |        |
| STAC2     | stromal antigen 2                                                                                | 496710 | 10735 | X | 0 | 0 | 0 | 0 | X | X      |
| STK38L    | serine/threonine kinase 38 like                                                                  | 184523 | 23012 | X | 0 | 0 | 0 | 0 |   |        |
| STRBP     | spermatid perinuclear RNA binding protein                                                        | 287659 | 55342 | X | 0 | 0 | 0 | 0 |   |        |
| STS       | steroid sulfatase (microsomal), arylsulfatase C, isozyme S                                       | 422578 | 412   | X | 0 | 0 | 0 | 0 |   |        |
| STX18     | svtaxisin 18                                                                                     | 584913 | 53407 | X | 0 | 0 | 0 | 0 |   |        |
| SUB1      | SUB1 homolog (S. cerevisiae)                                                                     | 229641 | 10923 | X | 1 | 0 | 0 | 1 |   |        |
| SUMO1     | SMT3 suppressor of mit two 3 homolog 1 (S. cerevisiae)                                           | 81424  | 7341  | X | 1 | 0 | 0 | 0 | X | X      |
| TAF9B     | TAF9B RNA polymerase II, TATA box binding protein (TBP)-associated factor, 31kDa                 | 592248 | 51616 | X | 0 | 0 | 0 | 1 |   |        |
| TAFL2     | talinin 2                                                                                        | 517168 | 8407  | X | 0 | 0 | 0 | 0 |   |        |
| TBC1D14   | TBC1 domain family, member 14                                                                    | 518611 | 57533 | X | 0 | 0 | 0 | 0 |   |        |
| TBC1D8    | TBC1 domain family, member 8 (with GRAM domain)                                                  | 442657 | 11138 | X | 0 | 0 | 0 | 0 |   |        |
| TCEA1     | transcription elongation factor A (CE1), 1                                                       | 384151 | 6917  | X | 0 | 0 | 0 | 0 |   |        |
| TCERG1    | transcription elongation regulator 1                                                             | 443465 | 10915 | X | 0 | 0 | 0 | 1 |   |        |
| TCF20     | transcription factor 20 (AR1)                                                                    | 475018 | 6942  | X | 0 | 0 | 0 | 0 |   |        |
| TCOF1     | Trescher Collins-Francischetti syndrome 1                                                        | 519672 | 6949  | X | 0 | 0 | 1 | 0 |   |        |
| TDG       | thymine-DNA glycosylase                                                                          | 584809 | 6996  | X | 0 | 0 | 0 | 1 |   |        |
| TER1      | telomerase reverse transcriptase                                                                 | 462203 | 7015  | X | 1 | 0 | 0 | 0 |   | MvcER  |
| TIMP2     | TIMP metalloproteinase inhibitor 2                                                               | 635514 | 7077  | X | 1 | 1 | 1 | 0 |   |        |
| TLOC1     | translocation protein 1                                                                          | 592561 | 7095  | X | 1 | 0 | 0 | 0 |   |        |
| TNFRSF4   | transmembrane 9 superfamily protein member 4                                                     | 129244 | 9777  | X | 1 | 1 | 1 | 0 |   |        |
| TMEFF1    | transmembrane protein with EGF-like and two follistatin-like domains 1                           | 336224 | 8577  | X | 0 | 0 | 0 | 0 |   |        |
| TMEM38A   | transmembrane protein 38A                                                                        | 436068 | 79041 | X | 0 | 0 | 0 | 0 |   |        |
| TWTC4     | transmembrane and tetrapeptide repeat containing 4                                               | 643460 | 8499  | X | 0 | 0 | 0 | 0 |   |        |
| TNFAIP3   | tumor necrosis factor, alpha-induced protein 3                                                   | 591338 | 7128  | X | 1 | 1 | 1 | 1 | X |        |
| TNFRSF12A | tumor necrosis factor receptor superfamily, member 12A                                           | 355899 | 51330 | X | 0 | 0 | 0 | 0 |   |        |
| TNFRSF17  | tumor necrosis factor receptor superfamily, member 17                                            | 3556   | 608   | X | 1 | 0 | 0 | 0 | X | X      |
| TNFRSF8   | tumor necrosis factor receptor superfamily, member 8                                             | 1314   | 943   | X | 0 | 0 | 1 | 0 |   |        |
| TNNT1     | troponin T type 1 (skeletal, slow)                                                               | 631558 | 7138  | X | 0 | 0 | 0 | 0 |   |        |
| TPK       | translocated promoter region (to activated MET oncogene)                                         | 279640 | 7175  | X | 0 | 0 | 0 | 0 |   |        |
| TRAM1     | translocation associated membrane protein 1                                                      | 491988 | 23471 | X | 1 | 1 | 0 | 1 |   |        |
| TUBGCP3   | tubulin, gamma complex associated protein 3                                                      | 224152 | 10426 | X | 0 | 0 | 0 | 0 |   |        |
| TUFT1     | tuftelin 1                                                                                       | 489922 | 7286  | X | 1 | 1 | 0 | 0 | X |        |
| TXNDC5    | thioredoxin domain containing 5                                                                  | 604380 | 81567 | X | 1 | 1 | 0 | 1 |   |        |
| UAP1      | UDP-N-acetylglucosamine 2-epimerase/hydrolase 1                                                  | 492859 | 6675  | X | 1 | 1 | 1 | 1 | X | X      |
| UBE2B     | ubiquitin-conjugating enzyme E2B (RAD6 homolog)                                                  | 644421 | 7320  | X | 1 | 0 | 1 | 0 |   |        |
| UBE2H     | ubiquitin-conjugating enzyme E2H (UBC6 homolog, yeast)                                           | 643548 | 7328  | X | 1 | 0 | 0 | 0 |   |        |
| UBE2I1    | ubiquitin-conjugating enzyme E2, I1 (UBC6 homolog, yeast)                                        | 163776 | 51465 | X | 1 | 0 | 1 | 1 |   |        |
| UCK2      | uridine-cytidine kinase 2                                                                        | 458360 | 7371  | X | 1 | 1 | 1 | 1 | X |        |
| UNG       | uracil-DNA glycosylase                                                                           | 191354 | 0     | X | 0 | 0 | 0 | 1 |   |        |
| USP9X     | ubiquitin specific peptidase 9, X-linked                                                         | 77579  | 8239  | X | 0 | 0 | 1 | 0 |   |        |
| VDAC1     | voltage-dependent anion channel 1                                                                | 519320 | 7416  | X | 0 | 0 | 1 | 0 |   |        |
| VEGFA     | vascular endothelial growth factor A                                                             | 73793  | 7422  | X | 0 | 1 | 0 | 0 |   | MvcPET |
| WNSC1     | Wolf-Hirschhorn syndrome candidate 1                                                             | 113876 | 7468  | X | 0 | 0 | 0 | 1 |   |        |
| WWC3      | WWC family member 3                                                                              | 527524 | 55841 | X | 0 | 0 | 0 | 0 |   |        |
| XPO1      | exportin 1 (nuclear export receptor for tRNAs)                                                   | 85951  | 11260 | X | 1 | 0 | 0 | 0 |   |        |
| YARS      | tyrosyl-tRNA synthetase                                                                          | 213264 | 8565  | X | 1 | 0 | 1 | 0 |   |        |
| YES1      | y-yes-1 Yamauchi sarcoma viral oncogene homolog 1                                                | 194148 | 7525  | X | 1 | 0 | 0 | 0 |   |        |
| ZC3H10    | zinc finger CCH2-type containing 10                                                              | 632706 | 84872 | X | 0 | 0 | 0 | 0 |   |        |
| ZFP36     | zinc finger protein 36, C3H type, homolog (mouse)                                                | 534052 | 7538  | X | 1 | 1 | 0 | 0 |   |        |
| ZNF37A    | zinc finger protein 37A                                                                          | 292575 | 7587  | X | 0 | 0 | 1 | 0 |   |        |



|       |                   |                                                             |          |       |            |            |             |            |            |             |            |
|-------|-------------------|-------------------------------------------------------------|----------|-------|------------|------------|-------------|------------|------------|-------------|------------|
| ABC81 | NM_00097.16090_R  | ACCTAAAACCTGCTTACATCCAGTTCCTCTCTCTGTAAGAACTCAAGTATGAAGACCGG | HL489033 | 7932  | -0.5082    | 0.17990026 | 0.074535993 | -0.0674875 | 0.3318003  | 0.912329164 |            |
| ABC81 | NM_00097.16090_R  | ACCTAAAACCTGCTTACATCCAGTTCCTCTCTGTAAGAACTCAAGTATGAAGACCGG   | HL489033 | 1238  | -0.8005    | 0.13278004 | 0.074535993 | -0.0674875 | 0.3318003  | 0.912329164 |            |
| ABC81 | NM_01209.161175_R | ACCTAAAACCTGCTTACATCCAGTTCCTCTCTGTAAGAACTCAAGTATGAAGACCGG   | HL17614  | 1446  | 0.0891135  | 0.2729211  | 0.76958811  | 0.531975   | 0.3621422  | 0.05728339  |            |
| ABC81 | NM_01209.161175_R | ACCTAAAACCTGCTTACATCCAGTTCCTCTCTGTAAGAACTCAAGTATGAAGACCGG   | HL17614  | 1626  | 0.0262755  | 0.2015112  | 0.07383689  | 0.2734662  | 0.37746524 | 0.0447889   |            |
| ABC81 | NM_01209.161175_R | ACCTAAAACCTGCTTACATCCAGTTCCTCTCTGTAAGAACTCAAGTATGAAGACCGG   | HL17614  | 1218  | 0.088288   | 0.2729211  | 0.76958811  | 0.531975   | 0.3621422  | 0.05728339  |            |
| ABC81 | NM_01209.161481_R | ACCTAAAACCTGCTTACATCCAGTTCCTCTCTGTAAGAACTCAAGTATGAAGACCGG   | HL17614  | 2502  | -0.476375  | 0.43062084 | 0.05572689  | -0.20102   | 0.1486172  | 0.23839637  |            |
| ABC81 | NM_01209.161481_R | ACCTAAAACCTGCTTACATCCAGTTCCTCTCTGTAAGAACTCAAGTATGAAGACCGG   | HL17614  | 79    | -0.4148975 | 0.3762796  | 0.07383689  | -0.2344    | 0.173988   | 0.27210099  |            |
| ABC81 | NM_01209.161481_R | ACCTAAAACCTGCTTACATCCAGTTCCTCTCTGTAAGAACTCAAGTATGAAGACCGG   | HL17614  | 13254 | -0.4587625 | 0.37509648 | 0.05042999  | -0.181     | 0.2716833  | 0.4097756   |            |
| ABC81 | NM_01209.161481_R | ACCTAAAACCTGCTTACATCCAGTTCCTCTCTGTAAGAACTCAAGTATGAAGACCGG   | HL17614  | 2504  | 0.8588264  | 0.1362222  | 0.07383689  | 0.95451    | 0.6955064  | 0.24460114  |            |
| ABC81 | NM_01209.161623_R | ACCTAAAACCTGCTTACATCCAGTTCCTCTCTGTAAGAACTCAAGTATGAAGACCGG   | HL17614  | 780   | -0.8979175 | 0.17560631 | 0.11620894  | -0.0487    | 0.1076835  | 0.3704948   |            |
| ABC81 | NM_01209.161623_R | ACCTAAAACCTGCTTACATCCAGTTCCTCTCTGTAAGAACTCAAGTATGAAGACCGG   | HL17614  | 12156 | -0.1517975 | 0.3425729  | 0.35818617  | -0.465285  | 0.4470072  | 0.12020906  |            |
| ABC81 | NM_00374.161444_R | ACCTAAAACCTGCTTACATCCAGTTCCTCTCTGTAAGAACTCAAGTATGAAGACCGG   | HL158316 | 1444  | 3.1423795  | 0.63771669 | 0.974805    | 0.9945     | 0.46646207 | 0.00341297  |            |
| ABC81 | NM_00374.161444_R | ACCTAAAACCTGCTTACATCCAGTTCCTCTCTGTAAGAACTCAAGTATGAAGACCGG   | HL158316 | 6820  | 3.2380375  | 0.76381704 | 0.00017198  | 0.98175    | 0.4201858  | 0.00044248  |            |
| ABC81 | NM_00374.161444_R | ACCTAAAACCTGCTTACATCCAGTTCCTCTCTGTAAGAACTCAAGTATGAAGACCGG   | HL158316 | 12196 | 3.0614375  | 0.7331306  | 0.00017198  | 0.98175    | 0.4201858  | 0.00044248  |            |
| ABC81 | NM_00374.162099_R | ACCTAAAACCTGCTTACATCCAGTTCCTCTCTGTAAGAACTCAAGTATGAAGACCGG   | HL158316 | 1447  | -0.2923275 | 0.5050712  | 0.21992028  | -0.5896    | 0.6327952  | 0.00830363  |            |
| ABC81 | NM_00374.162099_R | ACCTAAAACCTGCTTACATCCAGTTCCTCTCTGTAAGAACTCAAGTATGAAGACCGG   | HL158316 | 6821  | -0.3071125 | 0.5030404  | 0.01327763  | -0.465285  | 0.3760893  | 0.08096499  |            |
| ABC81 | NM_00374.162099_R | ACCTAAAACCTGCTTACATCCAGTTCCTCTCTGTAAGAACTCAAGTATGAAGACCGG   | HL158316 | 12197 | -0.1313875 | 0.5264723  | 0.20632025  | -0.519975  | 0.5667379  | 0.01440206  |            |
| ABC81 | NM_00374.162099_R | ACCTAAAACCTGCTTACATCCAGTTCCTCTCTGTAAGAACTCAAGTATGAAGACCGG   | HL158316 | 1448  | -0.1517975 | 0.3425729  | 0.35818617  | -0.465285  | 0.4470072  | 0.12020906  |            |
| ABC81 | NM_00374.162099_R | ACCTAAAACCTGCTTACATCCAGTTCCTCTCTGTAAGAACTCAAGTATGAAGACCGG   | HL158316 | 6819  | -0.0904125 | 0.3175262  | 0.53799266  | -0.330425  | 0.5116137  | 0.23437912  |            |
| ABC81 | NM_00374.162099_R | ACCTAAAACCTGCTTACATCCAGTTCCTCTCTGTAAGAACTCAAGTATGAAGACCGG   | HL158316 | 12198 | -0.1593735 | 0.4097664  | 0.391260961 | -0.2855    | 0.5238975  | 0.24149486  |            |
| ABC81 | NM_00374.162099_R | ACCTAAAACCTGCTTACATCCAGTTCCTCTCTGTAAGAACTCAAGTATGAAGACCGG   | HL158316 | 1446  | 0.746255   | 0.4681198  | 0.01249977  | -0.29625   | 0.5571735  | 0.26534443  |            |
| ABC81 | NM_00374.162099_R | ACCTAAAACCTGCTTACATCCAGTTCCTCTCTGTAAGAACTCAAGTATGAAGACCGG   | HL158316 | 6822  | 0.653875   | 0.4459984  | 0.02370027  | -0.238375  | 0.3740954  | 0.01456902  |            |
| ABC81 | NM_00374.162099_R | ACCTAAAACCTGCTTACATCCAGTTCCTCTCTGTAAGAACTCAAGTATGAAGACCGG   | HL158316 | 12218 | 0.868375   | 0.4337493  | 0.01493957  | -0.508262  | 0.5577964  | 0.12960127  |            |
| ABC81 | NM_00374.162099_R | ACCTAAAACCTGCTTACATCCAGTTCCTCTCTGTAAGAACTCAAGTATGAAGACCGG   | HL158316 | 1465  | -1.509785  | 0.2082841  | 0.00012523  | -0.432325  | 0.4422976  | 0.146447969 |            |
| ABC81 | NM_00374.162099_R | ACCTAAAACCTGCTTACATCCAGTTCCTCTCTGTAAGAACTCAAGTATGAAGACCGG   | HL158316 | 6841  | -1.5256    | 0.1990115  | 0.00016554  | -0.465285  | 0.4470072  | 0.12020906  |            |
| ABC81 | NM_00374.162099_R | ACCTAAAACCTGCTTACATCCAGTTCCTCTCTGTAAGAACTCAAGTATGAAGACCGG   | HL158316 | 12217 | -1.453175  | 0.2376155  | 0.00029822  | -0.4844125 | 0.51492631 | 0.13189748  |            |
| ABC81 | NM_00374.162099_R | ACCTAAAACCTGCTTACATCCAGTTCCTCTCTGTAAGAACTCAAGTATGAAGACCGG   | HL158316 | 1462  | -0.0217475 | 0.5489765  | 0.00758464  | -0.102822  | 0.595199   | 0.37039302  |            |
| ABC81 | NM_00374.162099_R | ACCTAAAACCTGCTTACATCCAGTTCCTCTCTGTAAGAACTCAAGTATGAAGACCGG   | HL158316 | 6827  | -0.08425   | 0.3366167  | 0.03381623  | -0.0822375 | 0.58112241 | 0.89954394  |            |
| ABC81 | NM_00374.162099_R | ACCTAAAACCTGCTTACATCCAGTTCCTCTCTGTAAGAACTCAAGTATGAAGACCGG   | HL158316 | 12204 | -0.0665    | 0.1818554  | 0.86614157  | -0.126375  | 0.3602265  | 0.37943863  |            |
| ABC81 | NM_00374.162099_R | ACCTAAAACCTGCTTACATCCAGTTCCTCTCTGTAAGAACTCAAGTATGAAGACCGG   | HL158316 | 1451  | -0.87345   | 0.4489763  | 0.01280748  | -0.282675  | 0.5037684  | 0.17653077  |            |
| ABC81 | NM_00374.162099_R | ACCTAAAACCTGCTTACATCCAGTTCCTCTCTGTAAGAACTCAAGTATGAAGACCGG   | HL158316 | 6827  | -0.8725    | 0.488346   | 0.01571872  | -0.312625  | 0.5246098  | 0.33673862  |            |
| ABC81 | NM_00374.162099_R | ACCTAAAACCTGCTTACATCCAGTTCCTCTCTGTAAGAACTCAAGTATGAAGACCGG   | HL158316 | 12203 | 0.889      | 0.4548484  | 0.01460221  | -0.4024625 | 0.3959784  | 0.16344649  |            |
| ABC81 | NM_00374.162099_R | ACCTAAAACCTGCTTACATCCAGTTCCTCTCTGTAAGAACTCAAGTATGAAGACCGG   | HL158316 | 1462  | 0.08825    | 0.5402021  | 0.57457482  | -0.3674125 | 0.448183   | 0.22178312  |            |
| ABC81 | NM_00374.162099_R | ACCTAAAACCTGCTTACATCCAGTTCCTCTCTGTAAGAACTCAAGTATGAAGACCGG   | HL158316 | 792   | 0.09425    | 0.5509448  | 0.5843933   | -0.375625  | 0.4032098  | 0.22093949  |            |
| ABC81 | NM_00374.162099_R | ACCTAAAACCTGCTTACATCCAGTTCCTCTCTGTAAGAACTCAAGTATGAAGACCGG   | HL158316 | 1462  | 0.09685    | 0.5420523  | 0.5926431   | -0.3314875 | 0.4264791  | 0.26423718  |            |
| ABC81 | NM_00374.162099_R | ACCTAAAACCTGCTTACATCCAGTTCCTCTCTGTAAGAACTCAAGTATGAAGACCGG   | HL158316 | 2548  |            |            |             |            |            |             |            |
| ABC81 | NM_00374.162099_R | ACCTAAAACCTGCTTACATCCAGTTCCTCTCTGTAAGAACTCAAGTATGAAGACCGG   | HL158316 | 13300 |            |            |             |            |            |             |            |
| ABC81 | NM_00374.162099_R | ACCTAAAACCTGCTTACATCCAGTTCCTCTCTGTAAGAACTCAAGTATGAAGACCGG   | HL158316 | 2516  | 0.649125   | 0.2442152  | 0.01248255  | -1.150075  | 0.4879813  | 0.003408512 |            |
| ABC81 | NM_00374.162099_R | ACCTAAAACCTGCTTACATCCAGTTCCTCTCTGTAAGAACTCAAGTATGAAGACCGG   | HL158316 | 7892  | 0.7093275  | 0.184828   | 0.006436    | -1.1289    | 0.4581768  | 0.00330987  |            |
| ABC81 | NM_00374.162099_R | ACCTAAAACCTGCTTACATCCAGTTCCTCTCTGTAAGAACTCAAGTATGAAGACCGG   | HL158316 | 13268 | 0.678375   | 0.2794571  | 0.01282328  | -1.08475   | 0.4570961  | 0.0060562   |            |
| ABC81 | NM_00374.162099_R | ACCTAAAACCTGCTTACATCCAGTTCCTCTCTGTAAGAACTCAAGTATGAAGACCGG   | HL158316 | 2518  | 0.913125   | 0.4381874  | 0.00884863  | -1.0578    | 0.4570961  | 0.0060562   |            |
| ABC81 | NM_00374.162099_R | ACCTAAAACCTGCTTACATCCAGTTCCTCTCTGTAAGAACTCAAGTATGAAGACCGG   | HL158316 | 7894  | 1.0627625  | 0.58914251 | 0.01119735  | -0.88835   | 0.5477692  | 0.02718389  |            |
| ABC81 | NM_00374.162099_R | ACCTAAAACCTGCTTACATCCAGTTCCTCTCTGTAAGAACTCAAGTATGAAGACCGG   | HL158316 | 13210 | 1.051125   | 0.4381874  | 0.00884863  | -1.0578    | 0.4570961  | 0.0060562   |            |
| ABC81 | NM_00374.162099_R | ACCTAAAACCTGCTTACATCCAGTTCCTCTCTGTAAGAACTCAAGTATGAAGACCGG   | HL158316 | 2520  | -0.1748375 | 0.3788334  | 0.32694242  | -0.314475  | 0.9434909  | 0.02952402  |            |
| ABC81 | NM_00374.162099_R | ACCTAAAACCTGCTTACATCCAGTTCCTCTCTGTAAGAACTCAAGTATGAAGACCGG   | HL158316 | 7896  | -0.082625  | 0.3250291  | 0.3250291   | -0.0998    | 0.8727233  | 0.78033987  |            |
| ABC81 | NM_00374.162099_R | ACCTAAAACCTGCTTACATCCAGTTCCTCTCTGTAAGAACTCAAGTATGAAGACCGG   | HL158316 | 13272 | -1.128875  | 0.3921747  | 0.44035551  | -0.98181   | 0.6064512  | 0.25193624  |            |
| ABC81 | NM_00374.162099_R | ACCTAAAACCTGCTTACATCCAGTTCCTCTCTGTAAGAACTCAAGTATGAAGACCGG   | HL158316 | 1449  | 0.330625   | 0.33381487 | 0.16835508  | -0.3815    | 0.2773504  | 0.03927687  |            |
| ABC81 | NM_00374.162099_R | ACCTAAAACCTGCTTACATCCAGTTCCTCTCTGTAAGAACTCAAGTATGAAGACCGG   | HL158316 | 6825  | 0.2983775  | 0.1511388  | 0.00744634  | -0.3815    | 0.2773504  | 0.03927687  |            |
| ABC81 | NM_00374.162099_R | ACCTAAAACCTGCTTACATCCAGTTCCTCTCTGTAAGAACTCAAGTATGAAGACCGG   | HL158316 | 12201 | 0.2019375  | 0.14748849 | 0.2975424   | -0.52875   | 0.2714803  | 0.04132605  |            |
| ABC81 | NM_00374.162099_R | ACCTAAAACCTGCTTACATCCAGTTCCTCTCTGTAAGAACTCAAGTATGAAGACCGG   | HL158316 | 1450  | 0.6019375  | 0.2986246  | 0.00854634  | -0.465285  | 0.1326966  | 0.00854634  |            |
| ABC81 | NM_00374.162099_R | ACCTAAAACCTGCTTACATCCAGTTCCTCTCTGTAAGAACTCAAGTATGAAGACCGG   | HL158316 | 6826  | 0.7366375  | 0.3299813  | 0.01184603  | -0.46525   | 0.1805504  | 0.03626419  |            |
| ABC81 | NM_00374.162099_R | ACCTAAAACCTGCTTACATCCAGTTCCTCTCTGTAAGAACTCAAGTATGAAGACCGG   | HL158316 | 12200 | -0.0665    | 0.1818554  | 0.86614157  | -0.126375  | 0.3602265  | 0.37943863  |            |
| ABC81 | NM_00374.162099_R | ACCTAAAACCTGCTTACATCCAGTTCCTCTCTGTAAGAACTCAAGTATGAAGACCGG   | HL158316 | 1448  | -1.1768375 | 0.4348023  | 0.0022139   | -1.1502    | 0.4296115  | 0.55359944  |            |
| ABC81 | NM_00374.162099_R | ACCTAAAACCTGCTTACATCCAGTTCCTCTCTGTAAGAACTCAAGTATGAAGACCGG   | HL158316 | 7897  | -0.082625  | 0.3250291  | 0.3250291   | -0.0998    | 0.8727233  | 0.78033987  |            |
| ABC81 | NM_00374.162099_R | ACCTAAAACCTGCTTACATCCAGTTCCTCTCTGTAAGAACTCAAGTATGAAGACCGG   | HL158316 | 13266 | -1.189625  | 0.4326084  | 0.00292028  | -1.1495    | 0.40629702 | 0.54936507  |            |
| ABC81 | NM_00374.162099_R | ACCTAAAACCTGCTTACATCCAGTTCCTCTCTGTAAGAACTCAAGTATGAAGACCGG   | HL158316 | 1447  | 0.2933875  | 0.2779596  | 0.002146715 | -2.2402    | 0.0387104  | 0.00449213  |            |
| ABC81 | NM_00374.162099_R | ACCTAAAACCTGCTTACATCCAGTTCCTCTCTGTAAGAACTCAAGTATGAAGACCGG   | HL158316 | 6823  | 0.0301125  | 0.2483314  | 0.007187742 | -0.023042  | 0.00324072 | 0.00324072  |            |
| ABC81 | NM_00374.162099_R | ACCTAAAACCTGCTTACATCCAGTTCCTCTCTGTAAGAACTCAAGTATGAAGACCGG   | HL158316 | 12199 | 2.671875   | 1.5531591  | 0.00795709  | 2.0184     | 0.9232463  | 0.01607778  |            |
| ABC81 | NM_00374.162099_R | ACCTAAAACCTGCTTACATCCAGTTCCTCTCTGTAAGAACTCAAGTATGAAGACCGG   | HL158316 | 2517  | 1.151625   | 0.2483314  | 0.007187742 | -0.023042  | 0.00324072 | 0.00324072  |            |
| ABC81 | NM_00374.162099_R | ACCTAAAACCTGCTTACATCCAGTTCCTCTCTGTAAGAACTCAAGTATGAAGACCGG   | HL158316 | 7888  | 0.2203735  | 0.2352179  | 0.30166955  | 0.2014     | 0.2197877  | 0.52630137  |            |
| ABC81 | NM_00374.162099_R | ACCTAAAACCTGCTTACATCCAGTTCCTCTCTGTAAGAACTCAAGTATGAAGACCGG   | HL158316 | 13264 | -0.0665    | 0.1818554  | 0.86614157  | -0.126375  | 0.3602265  | 0.37943863  |            |
| ABC81 | NM_00374.162099_R | ACCTAAAACCTGCTTACATCCAGTTCCTCTCTGTAAGAACTCAAGTATGAAGACCGG   | HL158316 | 1448  | -0.103625  | 0.4780186  | 0.58890799  | -0.0861    | 0.4570819  | 0.1762796   |            |
| ABC81 | NM_00374.162099_R | ACCTAAAACCTGCTTACATCCAGTTCCTCTCTGTAAGAACTCAAGTATGAAGACCGG   | HL158316 | 6824  | 0.0820375  | 0.3202999  | 0.01148275  | 0.0315     | 0.6091910  | 0.06449779  |            |
| ABC81 | NM_00374.162099_R | ACCTAAAACCTGCTTACATCCAGTTCCTCTCTGTAAGAACTCAAGTATGAAGACCGG   | HL158316 | 12200 | 0.2661875  | 0.2181861  | 0.10517658  | -0.141908  | 0.4147008  | 0.6501893   |            |
| ABC81 | NM_00374.162099_R | ACCTAAAACCTGCTTACATCCAGTTCCTCTCTGTAAGAACTCAAGTATGAAGACCGG   | HL158316 | 15191 | 2510       | -0.3442625 | 0.5506051   | 0.18541482 | -0.1056    | 0.2196242   | 0.61626107 |
| ABC81 | NM_00374.162099_R | ACCTAAAACCTGCTTACATCCAGTTCCTCTCTGTAAGAACTCAAGTATGAAGACCGG   | HL158316 | 7886  | 0.3381125  | 0.3581874  | 0.00391289  | -0.1056    | 0.2196242  | 0.61626107  |            |
| ABC81 | NM_00374.162099_R | ACCTAAAACCTGCTTACATCCAGTTCCTCTCTGTAAGAACTCAAGTATGAAGACCGG   | HL158316 | 13262 | -0.390625  | 0.49239977 | 0.12198846  |            |            |             |            |

|      |                     |                                                        |          |       |            |            |             |             |            |             |             |
|------|---------------------|--------------------------------------------------------|----------|-------|------------|------------|-------------|-------------|------------|-------------|-------------|
| ABC5 | NM_005888_160103_3  | ACCTAAAAGGACCCCTTGTGCATCTTCTCTGTAAGAGTGCACCAACCGCTCCGG | HL388653 | 1423  | -1.0829375 | 0.4389918  | 0.00437866  | -0.2268     | 0.67582631 | 0.479924634 |             |
| ABC5 | NM_005888_160103_4  | ACCTAAAAGGACCCCTTGTGCATCTTCTCTGTAAGAGTGCACCAACCGCTCCGG | HL388653 | 6798  | -0.1717795 | 0.4389918  | 0.00437866  | -0.5656     | 0.3908268  | 0.040390375 |             |
| ABC5 | NM_005888_160103_5  | ACCTAAAAGGACCCCTTGTGCATCTTCTCTGTAAGAGTGCACCAACCGCTCCGG | HL388653 | 12175 | 1.0383795  | 0.37680984 | 0.01170663  | -0.3305     | 0.51881972 | 0.246610136 |             |
| ABC5 | NM_005888_160103_6  | ACCTAAAAGGACCCCTTGTGCATCTTCTCTGTAAGAGTGCACCAACCGCTCCGG | HL388653 | 2496  | 1.1261425  | 0.36059993 | 0.001349487 | 1.80205     | 0.74881124 | 0.01263886  |             |
| ABC5 | NM_005888_160103_7  | ACCTAAAAGGACCCCTTGTGCATCTTCTCTGTAAGAGTGCACCAACCGCTCCGG | HL388653 | 7840  | 1.1261425  | 0.36059993 | 0.001349487 | 1.7641936   | 0.60137189 | 0.01263886  |             |
| ABC5 | NM_005888_160103_8  | ACCTAAAAGGACCCCTTGTGCATCTTCTCTGTAAGAGTGCACCAACCGCTCCGG | HL388653 | 13216 | 0.2662125  | 1.10013605 | 0.214887797 | 1.82023     | 0.58866316 | 0.00051586  |             |
| ABC5 | NM_005888_160103_9  | ACCTAAAAGGACCCCTTGTGCATCTTCTCTGTAAGAGTGCACCAACCGCTCCGG | HL388653 | 1424  | 0.3605129  | 0.31204989 | 0.12820047  | 1.4138      | 0.48098006 | 0.328441495 |             |
| ABC5 | NM_005888_16011_1   | ACCTAAAAGGACCCCTTGTGCATCTTCTCTGTAAGAGTGCACCAACCGCTCCGG | HL388653 | 6800  | 0.3681525  | 0.33418474 | 0.13069253  | 0.14505     | 0.50540203 | 0.589458996 |             |
| ABC5 | NM_005888_16011_2   | ACCTAAAAGGACCCCTTGTGCATCTTCTCTGTAAGAGTGCACCAACCGCTCCGG | HL388653 | 76    | 0.2941426  | 0.31204989 | 0.12820047  | 0.4296      | 0.4663883  | 0.37224441  |             |
| ABC6 | NM_001171_160129_1  | ACCTAAAAGGACCCCTTGTGCATCTTCTCTGTAAGAGTGCACCAACCGCTCCGG | HL442182 | 2462  | -1.7197125 | 0.84471851 | 0.00489723  | -0.2935     | 0.36125166 | 0.238363595 |             |
| ABC6 | NM_001171_160129_2  | ACCTAAAAGGACCCCTTGTGCATCTTCTCTGTAAGAGTGCACCAACCGCTCCGG | HL442182 | 7838  | -0.2521225 | 0.49219361 | 0.29526335  | -0.3401     | 0.40370947 | 0.11272068  |             |
| ABC6 | NM_001171_160129_3  | ACCTAAAAGGACCCCTTGTGCATCTTCTCTGTAAGAGTGCACCAACCGCTCCGG | HL442182 | 13214 | 1.5741375  | 0.67905584 | 0.00239288  | -0.12625    | 0.46026009 | 0.25160101  |             |
| ABC6 | NM_001171_160405_1  | ACCTAAAAGGACCCCTTGTGCATCTTCTCTGTAAGAGTGCACCAACCGCTCCGG | HL442182 | 2458  | -0.2542765 | 0.45316379 | 0.251422395 | -0.76299    | 0.76412465 | 0.051986231 |             |
| ABC6 | NM_001171_160405_2  | ACCTAAAAGGACCCCTTGTGCATCTTCTCTGTAAGAGTGCACCAACCGCTCCGG | HL442182 | 7834  | -0.2321225 | 0.49219361 | 0.29526335  | -0.881      | 0.72881124 | 0.039964652 |             |
| ABC6 | NM_001171_160405_3  | ACCTAAAAGGACCCCTTGTGCATCTTCTCTGTAAGAGTGCACCAACCGCTCCGG | HL442182 | 13210 | -0.2542765 | 0.45316379 | 0.251422395 | -0.7838     | 0.69833005 | 0.04242908  |             |
| ABC6 | NM_001171_160405_4  | ACCTAAAAGGACCCCTTGTGCATCTTCTCTGTAAGAGTGCACCAACCGCTCCGG | HL442182 | 2460  | 0.1256265  | 0.47937052 | 0.251288655 | 1.48        | 0.43459966 | 0.11272068  |             |
| ABC6 | NM_001171_160405_5  | ACCTAAAAGGACCCCTTGTGCATCTTCTCTGTAAGAGTGCACCAACCGCTCCGG | HL442182 | 7836  | -0.2542765 | 0.45316379 | 0.251422395 | 2.0558      | 0.35268114 | 0.08192887  |             |
| ABC6 | NM_001171_160405_6  | ACCTAAAAGGACCCCTTGTGCATCTTCTCTGTAAGAGTGCACCAACCGCTCCGG | HL442182 | 13212 | 0.20115    | 0.88869977 | 0.000859588 | 1.4817      | 0.44817    | 0.00235191  |             |
| ABC8 | NM_000352_160151_3  | ACCTAAAAGGACCCCTTGTGCATCTTCTCTGTAAGAGTGCACCAACCGCTCCGG | HL54470  | 1419  | 1.0892875  | 0.51832674 | 0.006817951 | 0.907235    | 0.3646919  | 0.009948582 |             |
| ABC8 | NM_000352_160151_4  | ACCTAAAAGGACCCCTTGTGCATCTTCTCTGTAAGAGTGCACCAACCGCTCCGG | HL54470  | 6795  | 1.0957875  | 0.51832674 | 0.006817951 | 0.944705    | 0.3470191  | 0.008023969 |             |
| ABC8 | NM_000352_160151_5  | ACCTAAAAGGACCCCTTGTGCATCTTCTCTGTAAGAGTGCACCAACCGCTCCGG | HL54470  | 12171 | 0.2623975  | 0.47967378 | 0.006464768 | 0.57085     | 0.33738128 | 0.051511005 |             |
| ABC8 | NM_000352_160494_1  | ACCTAAAAGGACCCCTTGTGCATCTTCTCTGTAAGAGTGCACCAACCGCTCCGG | HL54470  | 1420  | 0.2468265  | 0.1944656  | 0.225603238 | 0.38675     | 0.0915991  | 0.076326077 |             |
| ABC8 | NM_000352_160494_2  | ACCTAAAAGGACCCCTTGTGCATCTTCTCTGTAAGAGTGCACCAACCGCTCCGG | HL54470  | 6796  | 0.2303975  | 0.3309276  | 0.246891133 | 0.27975     | 0.0725969  | 0.172262066 |             |
| ABC8 | NM_000352_160494_3  | ACCTAAAAGGACCCCTTGTGCATCTTCTCTGTAAGAGTGCACCAACCGCTCCGG | HL54470  | 12172 | 0.2584875  | 0.31990515 | 0.270959112 | 0.462635    | 0.01521217 | 0.053041942 |             |
| ABC8 | NM_000352_160494_4  | ACCTAAAAGGACCCCTTGTGCATCTTCTCTGTAAGAGTGCACCAACCGCTCCGG | HL54470  | 1421  | 0.0479265  | 0.47029094 | 0.000561619 | -0.3301     | 0.40370947 | 0.053041942 |             |
| ABC8 | NM_000352_160494_5  | ACCTAAAAGGACCCCTTGTGCATCTTCTCTGTAAGAGTGCACCAACCGCTCCGG | HL54470  | 6797  | -1.0221125 | 0.35427308 | 0.002397272 | 0.349175    | 0.3907078  | 0.179234152 |             |
| ABC8 | NM_000352_160494_6  | ACCTAAAAGGACCCCTTGTGCATCTTCTCTGTAAGAGTGCACCAACCGCTCCGG | HL54470  | 12173 | -1.0757375 | 0.36239959 | 0.002370118 | 0.440175    | 0.4373797  | 0.112661951 |             |
| ABC9 | NM_005991_160139_1  | ACCTAAAAGGACCCCTTGTGCATCTTCTCTGTAAGAGTGCACCAACCGCTCCGG | HL46650  | 2452  | 0.6837375  | 0.21904485 | 0.00804857  | 1.1524      | 1.0085252  | 0.2265892   |             |
| ABC9 | NM_005991_160139_2  | ACCTAAAAGGACCCCTTGTGCATCTTCTCTGTAAGAGTGCACCAACCGCTCCGG | HL46650  | 7828  | 0.6268875  | 0.20099887 | 0.019489188 | 1.14575     | 0.9002245  | 0.0220149   |             |
| ABC9 | NM_005991_160139_3  | ACCTAAAAGGACCCCTTGTGCATCTTCTCTGTAAGAGTGCACCAACCGCTCCGG | HL46650  | 13204 | 0.612015   | 0.21249669 | 0.01236654  | 1.1306      | 0.961064   | 0.0247739   |             |
| ABC9 | NM_005991_160242_1  | ACCTAAAAGGACCCCTTGTGCATCTTCTCTGTAAGAGTGCACCAACCGCTCCGG | HL46650  | 7826  | 0.612015   | 0.21249669 | 0.01236654  | 0.69262     | 0.2038931  | 0.01226016  |             |
| ABC9 | NM_005991_160420_1  | ACCTAAAAGGACCCCTTGTGCATCTTCTCTGTAAGAGTGCACCAACCGCTCCGG | HL46650  | 1418  | -0.6789875 | 0.2231057  | 0.0059783   | 0.69262     | 0.2038931  | 0.01226016  |             |
| ABC9 | NM_005991_160420_2  | ACCTAAAAGGACCCCTTGTGCATCTTCTCTGTAAGAGTGCACCAACCGCTCCGG | HL46650  | 6794  | -0.1814265 | 0.4802071  | 0.37647094  | 0.5656      | 0.3908268  | 0.040390375 |             |
| ABC9 | NM_005991_160420_3  | ACCTAAAAGGACCCCTTGTGCATCTTCTCTGTAAGAGTGCACCAACCGCTCCGG | HL46650  | 12170 | -0.71098   | 0.26319647 | 0.00630731  | 0.67755     | 0.18412015 | 0.011966675 |             |
| ABC9 | NM_00003_160152_1   | ACCTAAAAGGACCCCTTGTGCATCTTCTCTGTAAGAGTGCACCAACCGCTCCGG | HL19546  | 2414  | -0.19948   | 0.47967378 | 0.006464768 | -1.361      | 0.77916    | 0.00235191  |             |
| ABC9 | NM_00003_160152_2   | ACCTAAAAGGACCCCTTGTGCATCTTCTCTGTAAGAGTGCACCAACCGCTCCGG | HL19546  | 7790  | -1.32105   | 0.7826414  | 0.04812181  | -1.361      | 0.77916    | 0.00235191  |             |
| ABC1 | NM_00003_160152_3   | ACCTAAAAGGACCCCTTGTGCATCTTCTCTGTAAGAGTGCACCAACCGCTCCGG | HL19546  | 13166 | -0.1958875 | 0.3129858  | 0.24665134  | -1.0420     | 0.443      | 0.2617376   | 0.130422729 |
| ABC1 | NM_00003_160152_4   | ACCTAAAAGGACCCCTTGTGCATCTTCTCTGTAAGAGTGCACCAACCGCTCCGG | HL19546  | 13166 | -0.1958875 | 0.3129858  | 0.24665134  | -1.0420     | 0.443      | 0.2617376   | 0.130422729 |
| ABC1 | NM_00003_160156_1   | ACCTAAAAGGACCCCTTGTGCATCTTCTCTGTAAGAGTGCACCAACCGCTCCGG | HL19546  | 6775  | 0.0476125  | 0.2128144  | 0.945049806 | 0.31705     | 0.5783084  | 0.28112516  |             |
| ABC1 | NM_00003_160156_2   | ACCTAAAAGGACCCCTTGTGCATCTTCTCTGTAAGAGTGCACCAACCGCTCCGG | HL19546  | 12151 | 0.1609125  | 0.4388764  | 0.017904129 | 0.1227274   | 0.3227274  | 0.053700888 |             |
| ABC1 | NM_00003_160156_3   | ACCTAAAAGGACCCCTTGTGCATCTTCTCTGTAAGAGTGCACCAACCGCTCCGG | HL19546  | 2412  | 0.8402875  | 0.08079543 | 0.001771428 | 0.000666667 | 0.12650654 | 0.710341885 |             |
| ABC1 | NM_00003_160182_1   | ACCTAAAAGGACCCCTTGTGCATCTTCTCTGTAAGAGTGCACCAACCGCTCCGG | HL19546  | 7798  | 0.8398125  | 0.50937703 | 0.0099918   | 0.7798      | 0.6284935  | 0.0099918   |             |
| ABC1 | NM_00003_160182_2   | ACCTAAAAGGACCCCTTGTGCATCTTCTCTGTAAGAGTGCACCAACCGCTCCGG | HL19546  | 13164 | 0.7386262  | 0.14395543 | 0.0041117   | 0.76775     | 0.55112668 | 0.5344664   |             |
| ABC1 | NM_00003_160182_3   | ACCTAAAAGGACCCCTTGTGCATCTTCTCTGTAAGAGTGCACCAACCGCTCCGG | HL19546  | 13164 | 0.7386262  | 0.14395543 | 0.0041117   | 0.76775     | 0.55112668 | 0.5344664   |             |
| ABC1 | NM_005184_160142_1  | ACCTAAAAGGACCCCTTGTGCATCTTCTCTGTAAGAGTGCACCAACCGCTCCGG | HL591042 | 2410  | 0.0321125  | 0.3838492  | 0.00018442  | 0.000666667 | 0.12650654 | 0.710341885 |             |
| ABC1 | NM_005184_160142_2  | ACCTAAAAGGACCCCTTGTGCATCTTCTCTGTAAGAGTGCACCAACCGCTCCGG | HL591042 | 6774  | -0.1941215 | 0.3313949  | 0.2853202   | 0.19225     | 0.43021661 | 0.07244845  |             |
| ABC1 | NM_005184_160142_3  | ACCTAAAAGGACCCCTTGTGCATCTTCTCTGTAAGAGTGCACCAACCGCTCCGG | HL591042 | 12150 | -0.1477375 | 0.350193   | 0.367390094 | 0.31212     | 0.4362849  | 0.06128236  |             |
| ABC1 | NM_005184_160142_4  | ACCTAAAAGGACCCCTTGTGCATCTTCTCTGTAAGAGTGCACCAACCGCTCCGG | HL591042 | 2410  | 0.0321125  | 0.3838492  | 0.00018442  | 0.000666667 | 0.12650654 | 0.710341885 |             |
| ABC2 | NM_005184_160214_1  | ACCTAAAAGGACCCCTTGTGCATCTTCTCTGTAAGAGTGCACCAACCGCTCCGG | HL591042 | 7786  | 0.0142875  | 0.33980784 | 0.067307909 | 0.140475    | 2.1819744  | 0.61420886  |             |
| ABC2 | NM_005184_160214_2  | ACCTAAAAGGACCCCTTGTGCATCTTCTCTGTAAGAGTGCACCAACCGCTCCGG | HL591042 | 13162 | 0.14549026 | 0.1520008  | 0.0099918   | 0.14549     | 0.14549026 | 0.0099918   |             |
| ABC2 | NM_005184_160774_1  | ACCTAAAAGGACCCCTTGTGCATCTTCTCTGTAAGAGTGCACCAACCGCTCCGG | HL591042 | 2408  | -0.0368275 | 0.44623015 | 0.74526823  | 0.17325     | 0.2716031  | 0.43074544  |             |
| ABC2 | NM_005184_160774_2  | ACCTAAAAGGACCCCTTGTGCATCTTCTCTGTAAGAGTGCACCAACCGCTCCGG | HL591042 | 7786  | -0.0368275 | 0.44623015 | 0.74526823  | 0.17325     | 0.2716031  | 0.43074544  |             |
| ABC2 | NM_005184_160774_3  | ACCTAAAAGGACCCCTTGTGCATCTTCTCTGTAAGAGTGCACCAACCGCTCCGG | HL591042 | 13160 | -0.0553735 | 0.46470077 | 0.85401427  | -0.17423    | 0.2882373  | 0.43658886  |             |
| ABC2 | NM_005184_160774_4  | ACCTAAAAGGACCCCTTGTGCATCTTCTCTGTAAGAGTGCACCAACCGCTCCGG | HL591042 | 13160 | -0.0553735 | 0.46470077 | 0.85401427  | -0.17423    | 0.2882373  | 0.43658886  |             |
| ABC2 | NM_005184_160774_5  | ACCTAAAAGGACCCCTTGTGCATCTTCTCTGTAAGAGTGCACCAACCGCTCCGG | HL591042 | 13160 | -0.0553735 | 0.46470077 | 0.85401427  | -0.17423    | 0.2882373  | 0.43658886  |             |
| ABC2 | NM_005184_160774_6  | ACCTAAAAGGACCCCTTGTGCATCTTCTCTGTAAGAGTGCACCAACCGCTCCGG | HL591042 | 13160 | -0.0553735 | 0.46470077 | 0.85401427  | -0.17423    | 0.2882373  | 0.43658886  |             |
| ABC2 | NM_005184_160774_7  | ACCTAAAAGGACCCCTTGTGCATCTTCTCTGTAAGAGTGCACCAACCGCTCCGG | HL591042 | 13160 | -0.0553735 | 0.46470077 | 0.85401427  | -0.17423    | 0.2882373  | 0.43658886  |             |
| ABC2 | NM_005184_160774_8  | ACCTAAAAGGACCCCTTGTGCATCTTCTCTGTAAGAGTGCACCAACCGCTCCGG | HL591042 | 13160 | -0.0553735 | 0.46470077 | 0.85401427  | -0.17423    | 0.2882373  | 0.43658886  |             |
| ABC2 | NM_005184_160774_9  | ACCTAAAAGGACCCCTTGTGCATCTTCTCTGTAAGAGTGCACCAACCGCTCCGG | HL591042 | 13160 | -0.0553735 | 0.46470077 | 0.85401427  | -0.17423    | 0.2882373  | 0.43658886  |             |
| ABC2 | NM_005184_160774_10 | ACCTAAAAGGACCCCTTGTGCATCTTCTCTGTAAGAGTGCACCAACCGCTCCGG | HL591042 | 13160 | -0.0553735 | 0.46470077 | 0.85401427  | -0.17423    | 0.2882373  | 0.43658886  |             |
| ABC2 | NM_005184_160774_11 | ACCTAAAAGGACCCCTTGTGCATCTTCTCTGTAAGAGTGCACCAACCGCTCCGG | HL591042 | 13160 | -0.0553735 | 0.46470077 | 0.85401427  | -0.17423    | 0.2882373  | 0.43658886  |             |
| ABC2 | NM_005184_160774_12 | ACCTAAAAGGACCCCTTGTGCATCTTCTCTGTAAGAGTGCACCAACCGCTCCGG | HL591042 | 13160 | -0.0553735 | 0.46470077 | 0.85401427  | -0.17423    | 0.2882373  | 0.43658886  |             |
| ABC2 | NM_005184_160774_13 | ACCTAAAAGGACCCCTTGTGCATCTTCTCTGTAAGAGTGCACCAACCGCTCCGG | HL591042 | 13160 | -0.0553735 | 0.46470077 | 0.85401427  | -0.17423    | 0.2882373  | 0.43658886  |             |
| ABC2 | NM_005184_160774_14 | ACCTAAAAGGACCCCTTGTGCATCTTCTCTGTAAGAGTGCACCAACCGCTCCGG | HL591042 | 13160 | -0.0553735 | 0.46470077 | 0.85401427  | -0.17423    | 0.2882373  | 0.43658886  |             |
| ABC2 | NM_005184_160774_15 | ACCTAAAAGGACCCCTTGTGCATCTTCTCTGTAAGAGTGCACCAACCGCTCCGG | HL591042 | 13160 | -0.0553735 | 0.46470077 | 0.85401427  | -0.17423    | 0.2882373  | 0.43658886  |             |
| ABC2 | NM_005184_160774_16 | ACCTAAAAGGACCCCTTGTGCATCTTCTCTGTAAGAGTGCACCAACCGCTCCGG | HL591042 | 13160 | -0.0553735 | 0.46470077 | 0.85401427  | -0.17       |            |             |             |

|        |                    |                                                           |          |       |            |            |             |             |            |             |
|--------|--------------------|-----------------------------------------------------------|----------|-------|------------|------------|-------------|-------------|------------|-------------|
| ABC05  | NK_022436_b0375_F  | ACCTAAAAGGAGCAGTATGTCGATCTCTCTCTCTGATAGATGACAGATGATCCGGGG | HL132992 | 6745  | -0.1750125 | 0.36689843 | 0.319678088 | 1.0231      | 0.3227171  | 0.00285021  |
| ABC05  | NK_022437_b0375_R  | ACCTAAAAGGAGCAGTATGTCGATCTCTCTCTGATAGATGACAGATGATCCGGGG   | HL132992 | 6746  | -0.2427875 | 0.3308955  | 0.31591587  | 1.0464      | 0.3245443  | 0.00295735  |
| ABC08  | NK_022437_b0375_R  | ACCTAAAAGGAGCAGTATGTCGATCTCTCTCTGATAGATGACAGATGATCCGGGG   | HL41931  | 1354  | -1.1568375 | 0.1403367  | 0.000363988 | 0.892523    | 0.1671771  | 0.62434224  |
| ABC08  | NK_022437_b0375_R  | ACCTAAAAGGAGCAGTATGTCGATCTCTCTCTGATAGATGACAGATGATCCGGGG   | HL41931  | 1355  | -1.1568375 | 0.1403367  | 0.000363988 | 0.892523    | 0.1671771  | 0.62434224  |
| ABC08  | NK_022437_b0375_R  | ACCTAAAAGGAGCAGTATGTCGATCTCTCTCTGATAGATGACAGATGATCCGGGG   | HL41931  | 12106 | -1.0808875 | 0.2617817  | 0.001091812 | 1.016973    | 0.1848624  | 0.09411265  |
| ABC08  | NK_022437_b0375_R  | ACCTAAAAGGAGCAGTATGTCGATCTCTCTCTGATAGATGACAGATGATCCGGGG   | HL41931  | 2360  | 0.0050275  | 0.7245284  | 0.91920566  | 1.412125    | 0.8286666  | 0.00567317  |
| ABC08  | NK_022437_b0375_R  | ACCTAAAAGGAGCAGTATGTCGATCTCTCTCTGATAGATGACAGATGATCCGGGG   | HL41931  | 77    | -0.1127125 | 0.188879   | 0.6661323   | 1.29262     | 0.9186026  | 0.01124837  |
| ABC08  | NK_022437_b0375_R  | ACCTAAAAGGAGCAGTATGTCGATCTCTCTCTGATAGATGACAGATGATCCGGGG   | HL41931  | 13112 | -0.0486875 | 0.9117288  | 0.70008935  | -0.8597     | 0.9572553  | 1.13022081  |
| ABHD4  | AK127297_b0121_R   | ACCTAAAAGGAGCAGTATGTCGATCTCTCTCTGATAGATGACAGATGATCCGGGG   | HL47654  | 4205  | -0.1127125 | 0.188879   | 0.6661323   | 1.29262     | 0.9186026  | 0.01124837  |
| ABHD4  | AK127297_b0121_R   | ACCTAAAAGGAGCAGTATGTCGATCTCTCTCTGATAGATGACAGATGATCCGGGG   | HL47654  | 9581  | -0.094875  | 0.9117288  | 0.70008935  | 1.07675     | 0.3291927  | 0.3994198   |
| ABHD4  | AK127297_b0121_R   | ACCTAAAAGGAGCAGTATGTCGATCTCTCTCTGATAGATGACAGATGATCCGGGG   | HL47654  | 14857 | -0.1127125 | 0.188879   | 0.6661323   | 1.29262     | 0.9186026  | 0.01124837  |
| ABHD4  | AK127297_b0121_R   | ACCTAAAAGGAGCAGTATGTCGATCTCTCTCTGATAGATGACAGATGATCCGGGG   | HL47654  | 4203  | 0.4895265  | 0.3664706  | 0.05106414  | 0.552425    | 0.3011994  | 0.00445054  |
| ABHD4  | AK127297_b0121_R   | ACCTAAAAGGAGCAGTATGTCGATCTCTCTCTGATAGATGACAGATGATCCGGGG   | HL47654  | 9459  | 0.6721875  | 0.1424645  | 0.02208485  | 0.97825     | 0.2787144  | 0.0419033   |
| ABHD4  | AK127297_b0121_R   | ACCTAAAAGGAGCAGTATGTCGATCTCTCTCTGATAGATGACAGATGATCCGGGG   | HL47654  | 14955 | 0.744375   | 0.5991956  | 0.03131265  | 0.9431      | 0.3484659  | 0.02426954  |
| ABHD4  | AK127297_b0121_R   | ACCTAAAAGGAGCAGTATGTCGATCTCTCTCTGATAGATGACAGATGATCCGGGG   | HL47654  | 4207  | -0.0928125 | 0.1914888  | 0.5606345   | -0.1566     | 0.4208322  | 0.526112276 |
| ABHD4  | AK127297_b0121_R   | ACCTAAAAGGAGCAGTATGTCGATCTCTCTCTGATAGATGACAGATGATCCGGGG   | HL47654  | 9583  | 0.0143125  | 0.2743272  | 0.93353378  | -0.1448     | 0.3815464  | 0.490140525 |
| ABHD4  | AK127297_b0121_R   | ACCTAAAAGGAGCAGTATGTCGATCTCTCTCTGATAGATGACAGATGATCCGGGG   | HL47654  | 14959 | 0.0548875  | 0.1973064  | 0.72961288  | -0.1324     | 0.3975047  | 0.5820589   |
| ABL1   | NK_005157_b01201_R | ACCTAAAAGGAGCAGTATGTCGATCTCTCTCTGATAGATGACAGATGATCCGGGG   | HL431048 | 573   | 0.10945    | 0.7142339  | 0.73428472  | -2.7187     | 1.39394804 | 2.00792174  |
| ABL1   | NK_005157_b01201_R | ACCTAAAAGGAGCAGTATGTCGATCTCTCTCTGATAGATGACAGATGATCCGGGG   | HL431048 | 11129 | -0.0624875 | 0.8774899  | 0.837484915 | -2.4016867  | 1.3746889  | 1.17829099  |
| ABL1   | NK_005157_b01201_R | ACCTAAAAGGAGCAGTATGTCGATCTCTCTCTGATAGATGACAGATGATCCGGGG   | HL431048 | 378   | 0.07675    | 0.8499246  | 0.8353351   | 1.499166667 | 0.6026757  | 0.02377967  |
| ABL1   | NK_005157_b01201_R | ACCTAAAAGGAGCAGTATGTCGATCTCTCTCTGATAGATGACAGATGATCCGGGG   | HL431048 | 5754  | -0.601825  | 1.8008094  | 0.43436918  | 0.87503333  | 0.8995474  | 0.07203286  |
| ABL1   | NK_005157_b01201_R | ACCTAAAAGGAGCAGTATGTCGATCTCTCTCTGATAGATGACAGATGATCCGGGG   | HL431048 | 11130 | -0.292725  | 0.8009661  | 0.50076991  | 1.30966667  | 1.3707668  | 0.65628986  |
| ABL1   | NK_005157_b01201_R | ACCTAAAAGGAGCAGTATGTCGATCTCTCTCTGATAGATGACAGATGATCCGGGG   | HL431048 | 5755  | -1.7006667 | 1.42251651 | 0.04312634  | -3.63585    | 2.0867482  | 0.04459793  |
| ABL1   | NK_005157_b01201_R | ACCTAAAAGGAGCAGTATGTCGATCTCTCTCTGATAGATGACAGATGATCCGGGG   | HL431048 | 11131 | -1.8029333 | 1.4447615  | 0.00749652  | -5.5035     | 4.0585751  | 1.08133746  |
| ABL1   | NK_005157_b01201_R | ACCTAAAAGGAGCAGTATGTCGATCTCTCTCTGATAGATGACAGATGATCCGGGG   | HL431048 | 379   | -1.588825  | 1.5121831  | 0.0458367   | -0.4982     | 2.1672632  | 6.5323625   |
| ABL2   | NK_007134_b03635_R | ACCTAAAAGGAGCAGTATGTCGATCTCTCTCTGATAGATGACAGATGATCCGGGG   | HL159472 | 5782  | 0.700725   | 0.2591516  | 0.004797583 | 0.0943      | 0.9420037  | 0.9156606   |
| ABL2   | NK_007134_b03635_R | ACCTAAAAGGAGCAGTATGTCGATCTCTCTCTGATAGATGACAGATGATCCGGGG   | HL159472 | 11158 | 0.54993333 | 0.2395889  | 0.04648964  | -0.28483333 | 0.2719956  | 0.7744133   |
| ABL2   | NK_007134_b03635_R | ACCTAAAAGGAGCAGTATGTCGATCTCTCTCTGATAGATGACAGATGATCCGGGG   | HL159472 | 407   | -0.526875  | 0.845731   | 0.1314648   | 0.47443333  | 1.7537466  | 0.582123099 |
| ABL2   | NK_007134_b03635_R | ACCTAAAAGGAGCAGTATGTCGATCTCTCTCTGATAGATGACAGATGATCCGGGG   | HL159472 | 5783  | -0.471075  | 0.8890432  | 0.25724033  | 0.5118      | 1.66091183 | 0.53464663  |
| ABL2   | NK_007134_b03635_R | ACCTAAAAGGAGCAGTATGTCGATCTCTCTCTGATAGATGACAGATGATCCGGGG   | HL159472 | 11159 | -0.340975  | 0.9888943  | 0.43427023  | 0.497766667 | 1.9811434  | 0.32770796  |
| ABLIM1 | NK_002133_b01600_R | ACCTAAAAGGAGCAGTATGTCGATCTCTCTCTGATAGATGACAGATGATCCGGGG   | HL438236 | 3368  | 0.417525   | 0.40341495 | 0.09419322  | 0.04        | 0.9420037  | 0.9156606   |
| ABLIM1 | NK_002133_b01600_R | ACCTAAAAGGAGCAGTATGTCGATCTCTCTCTGATAGATGACAGATGATCCGGGG   | HL438236 | 8744  | -0.5137333 | 0.2951601  | 0.04789339  | 0.012325    | 0.6729464  | 0.96629537  |
| ABLIM1 | NK_002133_b01600_R | ACCTAAAAGGAGCAGTATGTCGATCTCTCTCTGATAGATGACAGATGATCCGGGG   | HL438236 | 14120 | -0.614725  | 0.2401531  | 0.0139733   | 0.167375    | 0.4649662  | 0.05152125  |
| ABLIM1 | NK_002133_b01600_R | ACCTAAAAGGAGCAGTATGTCGATCTCTCTCTGATAGATGACAGATGATCCGGGG   | HL438236 | 3370  | 0.3819625  | 0.7685928  | 0.066475    | 0.19475     | 0.3523984  | 0.01620393  |
| ABLIM1 | NK_002133_b01600_R | ACCTAAAAGGAGCAGTATGTCGATCTCTCTCTGATAGATGACAGATGATCCGGGG   | HL438236 | 8746  | 0.6322     | 0.224784   | 0.0525936   | 0.19805     | 0.16176017 | 0.228138195 |
| ABLIM1 | NK_002133_b01600_R | ACCTAAAAGGAGCAGTATGTCGATCTCTCTCTGATAGATGACAGATGATCCGGGG   | HL438236 | 14122 | 0.3372     | 0.1190136  | 0.05617189  | 0.3988      | 0.9099464  | 0.06111798  |
| ABLIM1 | NK_002133_b01600_R | ACCTAAAAGGAGCAGTATGTCGATCTCTCTCTGATAGATGACAGATGATCCGGGG   | HL438236 | 3368  | 0.384825   | 0.2541311  | 0.06385129  | 0.444812    | 0.682796   | 0.121586473 |
| ABLIM1 | NK_002133_b01600_R | ACCTAAAAGGAGCAGTATGTCGATCTCTCTCTGATAGATGACAGATGATCCGGGG   | HL438236 | 8742  | -0.58075   | 0.1109045  | 0.00720722  | -0.329475   | 0.5883804  | 0.27894023  |
| ABLIM1 | NK_002133_b01600_R | ACCTAAAAGGAGCAGTATGTCGATCTCTCTCTGATAGATGACAGATGATCCGGGG   | HL438236 | 14118 | -0.11875   | 0.2468248  | 0.00842421  | -0.11875    | 0.4649662  | 0.09983327  |
| ABTB2  | AK095632_b03036_R  | ACCTAAAAGGAGCAGTATGTCGATCTCTCTCTGATAGATGACAGATGATCCGGGG   | HL23361  | 3952  | -0.1591125 | 0.4292023  | 0.47970652  | 0.617375    | 0.4649662  | 0.05152125  |
| ABTB2  | AK095632_b03036_R  | ACCTAAAAGGAGCAGTATGTCGATCTCTCTCTGATAGATGACAGATGATCCGGGG   | HL23361  | 9320  | -0.1127125 | 0.188879   | 0.6661323   | 1.29262     | 0.9186026  | 0.01124837  |
| ABTB2  | AK095632_b03036_R  | ACCTAAAAGGAGCAGTATGTCGATCTCTCTCTGATAGATGACAGATGATCCGGGG   | HL23361  | 14704 | 0.030612   | 0.4662326  | 0.89544683  | 0.13875     | 0.7638155  | 0.38229722  |
| ABTB2  | AK095632_b03036_R  | ACCTAAAAGGAGCAGTATGTCGATCTCTCTCTGATAGATGACAGATGATCCGGGG   | HL23361  | 9321  | -0.064825  | 0.373718   | 0.01042943  | 0.4050      | 0.1249991  | 0.8264917   |
| ABTB2  | AK095632_b03036_R  | ACCTAAAAGGAGCAGTATGTCGATCTCTCTCTGATAGATGACAGATGATCCGGGG   | HL23361  | 9330  | -0.8451875 | 0.6647179  | 0.01346751  | 0.320075    | 0.3576847  | 0.19491183  |
| ABTB2  | AK095632_b03036_R  | ACCTAAAAGGAGCAGTATGTCGATCTCTCTCTGATAGATGACAGATGATCCGGGG   | HL23361  | 14706 | 0.9035265  | 0.0444345  | 0.00059456  | 0.30875     | 0.7114865  | 0.35410808  |
| ABTB2  | AK095632_b03036_R  | ACCTAAAAGGAGCAGTATGTCGATCTCTCTCTGATAGATGACAGATGATCCGGGG   | HL23361  | 3958  | 0.70906467 | 0.4621921  | 0.00000000  | 0.5144      | 0.2467931  | 0.041292993 |
| ABTB2  | AK095632_b03036_R  | ACCTAAAAGGAGCAGTATGTCGATCTCTCTCTGATAGATGACAGATGATCCGGGG   | HL23361  | 9332  | 2.87773333 | 0.2848485  | 0.00014085  | 0.56705     | 0.3298155  | 0.03739902  |
| ABTB2  | AK095632_b03036_R  | ACCTAAAAGGAGCAGTATGTCGATCTCTCTCTGATAGATGACAGATGATCCGGGG   | HL23361  | 14708 | -0.60925   | 0.5709128  | 0.01490424  | 0.4408      | 0.60925    | 0.05661815  |
| ACTL6  | NK_178042_b0369_R  | ACCTAAAAGGAGCAGTATGTCGATCTCTCTCTGATAGATGACAGATGATCCGGGG   | HL435326 | 2538  | -0.146265  | 0.5897221  | 0.76205994  | -0.0193875  | 0.7184927  | 0.94251229  |
| ACTL6  | NK_178042_b0369_R  | ACCTAAAAGGAGCAGTATGTCGATCTCTCTCTGATAGATGACAGATGATCCGGGG   | HL435326 | 791   | -0.33326   | 0.5148721  | 0.00000000  | -0.33326    | 0.9257959  | 0.9781111   |
| ACTL6  | NK_178042_b0369_R  | ACCTAAAAGGAGCAGTATGTCGATCTCTCTCTGATAGATGACAGATGATCCGGGG   | HL435326 | 12390 | -0.1715    | 0.9439163  | 0.67353375  | -0.1397875  | 0.9881156  | 0.79372176  |
| ACTL6  | NK_178042_b0369_R  | ACCTAAAAGGAGCAGTATGTCGATCTCTCTCTGATAGATGACAGATGATCCGGGG   | HL435326 | 2538  | -0.1245    | 0.5148721  | 0.00000000  | -0.1245     | 0.9257959  | 0.9781111   |
| ACTL6  | NK_178042_b0369_R  | ACCTAAAAGGAGCAGTATGTCGATCTCTCTCTGATAGATGACAGATGATCCGGGG   | HL435326 | 791   | -0.33326   | 0.5148721  | 0.00000000  | -0.33326    | 0.9257959  | 0.9781111   |
| ACTL6  | NK_178042_b0369_R  | ACCTAAAAGGAGCAGTATGTCGATCTCTCTCTGATAGATGACAGATGATCCGGGG   | HL435326 | 12388 | 0.052225   | 0.48078617 | 0.649528691 | 0.444142    | 0.8773052  | 0.2457389   |
| ACTL6  | NK_178042_b0369_R  | ACCTAAAAGGAGCAGTATGTCGATCTCTCTCTGATAGATGACAGATGATCCGGGG   | HL435326 | 2538  | -0.1245    | 0.5148721  | 0.00000000  | -0.1245     | 0.9257959  | 0.9781111   |
| ACTL6  | NK_178042_b0369_R  | ACCTAAAAGGAGCAGTATGTCGATCTCTCTCTGATAGATGACAGATGATCCGGGG   | HL435326 | 791   | -0.33326   | 0.5148721  | 0.00000000  | -0.33326    | 0.9257959  | 0.9781111   |
| ACTL6  | NK_178042_b0369_R  | ACCTAAAAGGAGCAGTATGTCGATCTCTCTCTGATAGATGACAGATGATCCGGGG   | HL435326 | 12392 | 0.1624     | 0.5150048  | 0.03897736  | 0.4695125   | 0.9243809  | 0.26124508  |
| ACTL6  | NK_178042_b0369_R  | ACCTAAAAGGAGCAGTATGTCGATCTCTCTCTGATAGATGACAGATGATCCGGGG   | HL435326 | 2540  | -0.756     | 0.85736    | 0.0611661   | -0.1092625  | 0.8191229  | 0.91141319  |
| ACV1   | NK_001105_b0254_R  | ACCTAAAAGGAGCAGTATGTCGATCTCTCTCTGATAGATGACAGATGATCCGGGG   | HL470316 | 169   | 0.422475   | 0.6812884  | 0.0007722   | 0.059765    | 0.17905117 | 0.74797031  |
| ACV1   | NK_001105_b0254_R  | ACCTAAAAGGAGCAGTATGTCGATCTCTCTCTGATAGATGACAGATGATCCGGGG   | HL470316 | 545   | -0.4125    | 0.4773971  | 0.00000000  | -0.4125     | 0.874158   | 0.866372887 |
| ACV1   | NK_001105_b0254_R  | ACCTAAAAGGAGCAGTATGTCGATCTCTCTCTGATAGATGACAGATGATCCGGGG   | HL470316 | 10921 | 0.140675   | 0.6165297  | 0.19001982  | -0.039275   | 0.201485   | 0.80966424  |
| ACV1   | NK_001105_b0254_R  | ACCTAAAAGGAGCAGTATGTCGATCTCTCTCTGATAGATGACAGATGATCCGGGG   | HL470316 | 170   | -0.2625    | 0.1551257  | 0.09579725  | 0.270125    | 0.118528   | 0.10087049  |
| ACV1   | NK_001105_b0254_R  | ACCTAAAAGGAGCAGTATGTCGATCTCTCTCTGATAGATGACAGATGATCCGGGG   | HL470316 | 554   | -0.16925   | 0.1951498  | 0.3076975   | 0.272785    | 0.1290444  | 0.11251152  |
| ACV1   | NK_001105_b0254_R  | ACCTAAAAGGAGCAGTATGTCGATCTCTCTCTGATAGATGACAGATGATCCGGGG   | HL470316 | 10922 | -0.17525   | 0.2216531  | 0.30998723  | 0.293075    | 0.094206   | 0.08716729  |
| ACV1   | NK_001105_b0254_R  | ACCTAAAAGGAGCAGTATGTCGATCTCTCTCTGATAGATGACAGATGATCCGGGG   | HL470316 | 171   | 0.223      | 0.691994   | 0.3641983   | -0.472465   | 0.0081183  | 0.0081183   |
| ACV1   | NK_001105_b0254_R  | ACCTAAAAGGAGCAGTATGTCGATCTCTCTCTGATAGATGACAGATGATCCGGGG   | HL470316 | 5547  | -0.1408    | 0.1956     | 0.014007    | 0.1956      | 0.0447387  | 0.493474887 |
| ACV1   | NK_001105_b0254_R  | ACCTAAAAGGAGCAGTATGTCGATCTCTCTCTGATAGATGACAGATGATCCGGGG   | HL470316 | 10923 | 1.045      | 0.14968745 | 0.16979439  | -0.002925   | 0.24278    |             |





|       |           |          |                                                         |          |        |             |            |             |            |            |             |
|-------|-----------|----------|---------------------------------------------------------|----------|--------|-------------|------------|-------------|------------|------------|-------------|
| AKT3  | NM_005465 | 16178_R  | ACCTAAAGGATCCATTCAGGATGAATAATCTTGATTAATCTCTATGATGAGCCGG | HL498292 | 7053   | -0.8245     | 0.62251822 | 0.02793916  | 0.54396667 | 1.13155572 | 0.421646226 |
| AKT3  | NM_005465 | 16179_R  | ACCTAAAGGATCCATTCAGGATGAATAATCTTGATTAATCTCTATGATGAGCCGG | HL498292 | 12428  | -0.8245     | 0.62251822 | 0.02793916  | 0.54396667 | 1.13155572 | 0.421646226 |
| AKX   | NM_004304 | 164409_R | ACCTAAAAGCCCTGATACACAGCAAACTCTTGATTAATCTCTATGATGAGCCGG  | HL196334 | 10     | 0.0234      | 0.9314238  | 0.95786391  | -0.0206875 | 0.1200467  | 0.88735942  |
| AKX   | NM_004304 | 164409_R | ACCTAAAAGCCCTGATACACAGCAAACTCTTGATTAATCTCTATGATGAGCCGG  | HL196334 | 10762  | 0.0174      | 0.9314238  | 0.95786391  | -0.0206875 | 0.1200467  | 0.88735942  |
| AKX   | NM_004304 | 164409_R | ACCTAAAAGCCCTGATACACAGCAAACTCTTGATTAATCTCTATGATGAGCCGG  | HL196334 | 10762  | 0.0174      | 0.9314238  | 0.95786391  | -0.0206875 | 0.1200467  | 0.88735942  |
| AKX   | NM_004304 | 164409_R | ACCTAAAAGCCCTGATACACAGCAAACTCTTGATTAATCTCTATGATGAGCCGG  | HL196334 | 11     | 3.9997      | 0.13648476 | 0.00130146  | 0.0396265  | 0.17812085 | 0.85233913  |
| AKX   | NM_004304 | 164409_R | ACCTAAAAGCCCTGATACACAGCAAACTCTTGATTAATCTCTATGATGAGCCGG  | HL196334 | 5387   | 0.4132      | 0.9314238  | 0.95786391  | -0.0206875 | 0.1200467  | 0.88735942  |
| AKX   | NM_004304 | 164409_R | ACCTAAAAGCCCTGATACACAGCAAACTCTTGATTAATCTCTATGATGAGCCGG  | HL196334 | 10763  | 3.60115     | 0.1957797  | 0.00008608  | 0.129875   | 0.32911457 | 0.52069718  |
| AKX   | NM_004304 | 164429_R | ACCTAAAAGCCCTGATACACAGCAAACTCTTGATTAATCTCTATGATGAGCCGG  |          | 10764  |             |            |             |            |            |             |
| ALOX5 | BC13060   | 160370_R | ACCTAAAAGCCCTGATACACAGCAAACTCTTGATTAATCTCTATGATGAGCCGG  | HL89499  | 4805   | -0.070875   | 0.1225666  | 0.663148478 | 0.6106285  | 0.14330969 | 0.06658409  |
| ALOX5 | BC13060   | 160370_R | ACCTAAAAGCCCTGATACACAGCAAACTCTTGATTAATCTCTATGATGAGCCGG  | HL89499  | 10181  | -0.2646125  | 0.1064162  | 0.108322409 | 0.6010265  | 0.47381005 | 0.054112425 |
| ALOX5 | BC13060   | 160370_R | ACCTAAAAGCCCTGATACACAGCAAACTCTTGATTAATCTCTATGATGAGCCGG  | HL89499  | 15527  | -0.6888975  | 0.1479108  | 0.0467317   | 0.4623075  | 0.35502741 | 0.05164989  |
| ALOX5 | BC13060   | 160370_R | ACCTAAAAGCCCTGATACACAGCAAACTCTTGATTAATCTCTATGATGAGCCGG  | HL89499  | 4801   | 1.0548875   | 0.1514389  | 0.011388545 | 0.6261375  | 0.00713374 | 0.1894896   |
| ALOX5 | BC13060   | 160370_R | ACCTAAAAGCCCTGATACACAGCAAACTCTTGATTAATCTCTATGATGAGCCGG  | HL89499  | 10177  | -0.0160262  | 0.1964459  | 0.011095148 | 0.5946125  | 0.20680775 | 0.078143248 |
| ALOX5 | BC13060   | 160370_R | ACCTAAAAGCCCTGATACACAGCAAACTCTTGATTAATCTCTATGATGAGCCGG  | HL89499  | 15553  | 0.7597275   | 0.85347991 | 0.084477862 | 0.6664625  | 1.00073457 | 0.18690865  |
| ALOX5 | BC13060   | 160370_R | ACCTAAAAGCCCTGATACACAGCAAACTCTTGATTAATCTCTATGATGAGCCGG  | HL89499  | 4161   | 0.3088785   | 0.19651094 | 0.043705491 |            |            | 0.818975    |
| ALOX5 | BC13060   | 160370_R | ACCTAAAAGCCCTGATACACAGCAAACTCTTGATTAATCTCTATGATGAGCCGG  | HL89499  | 9537   | -0.2588075  | 0.1942453  | 0.25309133  |            |            | 0.709295    |
| ALOX5 | BC13060   | 160370_R | ACCTAAAAGCCCTGATACACAGCAAACTCTTGATTAATCTCTATGATGAGCCGG  | HL89499  | 14913  | -0.3897875  | 0.1799580  | 0.38752858  |            |            | 0.6475      |
| ALOX5 | BC13060   | 160370_R | ACCTAAAAGCCCTGATACACAGCAAACTCTTGATTAATCTCTATGATGAGCCGG  | HL89499  | 4165   | -0.2889785  | 0.13278217 | 0.173991361 |            |            | -0.0815     |
| ALOX5 | BC13060   | 160370_R | ACCTAAAAGCCCTGATACACAGCAAACTCTTGATTAATCTCTATGATGAGCCGG  | HL89499  | 9541   | -0.0032655  | 0.2625454  | 0.958453074 |            |            | 0.00175     |
| ALOX5 | BC13060   | 160370_R | ACCTAAAAGCCCTGATACACAGCAAACTCTTGATTAATCTCTATGATGAGCCGG  | HL89499  | 14917  | 0.0796265   | 0.2484898  | 0.641883297 |            |            | 0.021025    |
| ALOX5 | BC13060   | 160370_R | ACCTAAAAGCCCTGATACACAGCAAACTCTTGATTAATCTCTATGATGAGCCGG  | HL89499  | 1806   | -0.04495    | 0.07700271 | 0.862393077 | 0.6047     | 0.71530922 | 0.34776708  |
| ALOX5 | BC13060   | 160370_R | ACCTAAAAGCCCTGATACACAGCAAACTCTTGATTAATCTCTATGATGAGCCGG  | HL89499  | 1158   | 0.1508      |            |             | 0.1005     | 0.70703105 | 0.12558587  |
| ALOX5 | BC13060   | 160370_R | ACCTAAAAGCCCTGATACACAGCAAACTCTTGATTAATCTCTATGATGAGCCGG  | HL89499  | 127519 | 1.2558      | -0.1885    | 0.44385091  | 0.9573829  | 0.86905    | 0.68356113  |
| ALOX5 | BC13060   | 160370_R | ACCTAAAAGCCCTGATACACAGCAAACTCTTGATTAATCTCTATGATGAGCCGG  | HL89499  | 11336  | 1.80775     | 0.4993897  | 0.00925796  |            |            | 0.00086835  |
| ALOX5 | BC13060   | 160370_R | ACCTAAAAGCCCTGATACACAGCAAACTCTTGATTAATCTCTATGATGAGCCGG  | HL89499  | 5980   | 1.0987      | 0.28187567 | 0.001072343 |            |            | 1.645375    |
| ALOX5 | BC13060   | 160370_R | ACCTAAAAGCCCTGATACACAGCAAACTCTTGATTAATCTCTATGATGAGCCGG  | HL89499  | 11336  | 1.80775     | 0.4993897  | 0.00925796  |            |            | 0.00086835  |
| ALOX5 | BC13060   | 160370_R | ACCTAAAAGCCCTGATACACAGCAAACTCTTGATTAATCTCTATGATGAGCCGG  | HL89499  | 4272   | -0.08383    | 0.2899464  | 0.89338209  |            |            | 0.001798    |
| ALOX5 | BC13060   | 160370_R | ACCTAAAAGCCCTGATACACAGCAAACTCTTGATTAATCTCTATGATGAGCCGG  | HL89499  | 9648   | -0.05133333 | 0.17264254 | 0.81052779  |            |            | -0.8516     |
| ALOX5 | BC13060   | 160370_R | ACCTAAAAGCCCTGATACACAGCAAACTCTTGATTAATCTCTATGATGAGCCGG  | HL89499  | 15024  | 0.127225    | 0.11134057 | 0.92038916  |            |            | -0.6925     |
| ALOX5 | BC13060   | 160370_R | ACCTAAAAGCCCTGATACACAGCAAACTCTTGATTAATCTCTATGATGAGCCGG  | HL89499  | 9646   | 0.702275    | 1.8918918  | 0.98777679  | 0.000263   | 1.0937302  | 0.99066431  |
| ALOX5 | BC13060   | 160370_R | ACCTAAAAGCCCTGATACACAGCAAACTCTTGATTAATCTCTATGATGAGCCGG  | HL89499  | 4270   | 2.6445      | 0.1577541  | 0.10893917  | -0.57395   | 1.34059613 | 0.36130762  |
| ALOX5 | BC13060   | 160370_R | ACCTAAAAGCCCTGATACACAGCAAACTCTTGATTAATCTCTATGATGAGCCGG  | HL89499  | 15022  | 1.9472      | 2.8857002  | 0.14336879  | -0.056975  | 0.84783081 | 0.888412118 |
| ALOX5 | BC13060   | 160370_R | ACCTAAAAGCCCTGATACACAGCAAACTCTTGATTAATCTCTATGATGAGCCGG  | HL89499  | 667    | 0.1025      | 0.4209289  | 0.096455    |            |            | -0.1053     |
| ALOX5 | BC13060   | 160370_R | ACCTAAAAGCCCTGATACACAGCAAACTCTTGATTAATCTCTATGATGAGCCGG  | HL89499  | 9644   | -0.47925    | 0.8718283  | 0.22463379  | 0.569075   | 0.196249   | 0.0149077   |
| ALOX5 | BC13060   | 160370_R | ACCTAAAAGCCCTGATACACAGCAAACTCTTGATTAATCTCTATGATGAGCCGG  | HL89499  | 15020  | -0.25875    | 0.1223124  | 0.1129422   | 0.312275   | 0.4780258  | 0.0219229   |
| ALOX5 | BC13060   | 160370_R | ACCTAAAAGCCCTGATACACAGCAAACTCTTGATTAATCTCTATGATGAGCCGG  | HL89499  | 667    | 0.1025      | 0.4209289  | 0.096455    |            |            | 0.00086835  |
| ALOX5 | BC13060   | 160370_R | ACCTAAAAGCCCTGATACACAGCAAACTCTTGATTAATCTCTATGATGAGCCGG  | HL89499  | 6043   | 0.702175    | 0.5292787  | 0.02303402  | -0.3805    | 0.1811487  | 0.05607476  |
| ALOX5 | BC13060   | 160370_R | ACCTAAAAGCCCTGATACACAGCAAACTCTTGATTAATCTCTATGATGAGCCGG  | HL89499  | 11419  | 1.20125     | 1.0343837  | 0.02026574  | 1.467275   | 1.0982264  | 0.0310389   |
| ALOX5 | BC13060   | 160370_R | ACCTAAAAGCCCTGATACACAGCAAACTCTTGATTAATCTCTATGATGAGCCGG  | HL89499  | 2135   | -0.124      |            |             |            |            |             |
| ALOX5 | BC13060   | 160370_R | ACCTAAAAGCCCTGATACACAGCAAACTCTTGATTAATCTCTATGATGAGCCGG  | HL89499  | 7511   |             |            |             | 0.11778634 | 0.24577412 |             |
| ALOX5 | BC13060   | 160370_R | ACCTAAAAGCCCTGATACACAGCAAACTCTTGATTAATCTCTATGATGAGCCGG  | HL89499  | 12887  | -0.361      |            |             | 0.8523     | 1.0649732  | 0.2273041   |
| ALOX5 | BC13060   | 160370_R | ACCTAAAAGCCCTGATACACAGCAAACTCTTGATTAATCTCTATGATGAGCCGG  | HL89499  | 2181   | 0.2075      |            |             | 2.1175     | 3.4798118  | 0.30642874  |
| ALOX5 | BC13060   | 160370_R | ACCTAAAAGCCCTGATACACAGCAAACTCTTGATTAATCTCTATGATGAGCCGG  | HL89499  | 12913  | -0.975      |            |             | -0.2407    |            |             |
| ALOX5 | BC13060   | 160370_R | ACCTAAAAGCCCTGATACACAGCAAACTCTTGATTAATCTCTATGATGAGCCGG  | HL89499  | 757    | 0.1517      |            |             |            |            |             |
| AMR2  | NM_020547 | 16684_R  | ACCTAAAAGCCCTGATACACAGCAAACTCTTGATTAATCTCTATGATGAGCCGG  | HL437877 | 635    | 2.62886     | 0.42130825 | 5.41E-05    | 0.819      | 0.4004377  | 0.02578401  |
| AMR2  | NM_020547 | 16684_R  | ACCTAAAAGCCCTGATACACAGCAAACTCTTGATTAATCTCTATGATGAGCCGG  | HL437877 | 6011   | 2.6641      | 0.6090145  | 0.00016623  | 0.897175   | 0.4479985  | 0.01288778  |
| AMR2  | NM_020547 | 16684_R  | ACCTAAAAGCCCTGATACACAGCAAACTCTTGATTAATCTCTATGATGAGCCGG  | HL437877 | 11367  | 0.7215      | 0.4475     | 0.3409587   | 0.107425   | 0.8388033  | 0.0056489   |
| AMR2  | NM_020547 | 16684_R  | ACCTAAAAGCCCTGATACACAGCAAACTCTTGATTAATCTCTATGATGAGCCGG  | HL437877 | 636    | -0.3915     | 0.1949992  | 0.06152185  | 0.03485    | 0.2951215  | 0.85118455  |
| AMR2  | NM_020547 | 16684_R  | ACCTAAAAGCCCTGATACACAGCAAACTCTTGATTAATCTCTATGATGAGCCGG  | HL437877 | 6012   | 1.658       | 0.612      | 0.309487    | 0.107425   | 0.8388033  | 0.0056489   |
| AMR2  | NM_020547 | 16684_R  | ACCTAAAAGCCCTGATACACAGCAAACTCTTGATTAATCTCTATGATGAGCCGG  | HL437877 | 11388  | 0.7373      | 1.5292748  | 0.56234308  | 0.2261     | 0.269349   | 0.24832424  |
| AMR2  | NM_020547 | 16684_R  | ACCTAAAAGCCCTGATACACAGCAAACTCTTGATTAATCTCTATGATGAGCCGG  | HL437877 | 6012   | 1.658       | 0.612      | 0.309487    | 0.107425   | 0.8388033  | 0.0056489   |
| AMR2  | NM_020547 | 16684_R  | ACCTAAAAGCCCTGATACACAGCAAACTCTTGATTAATCTCTATGATGAGCCGG  | HL437877 | 6035   | 1.52925     | 0.4007244  | 0.00503456  | 0.20025    | 0.2423206  | 0.27517793  |
| AMR2  | NM_020547 | 16684_R  | ACCTAAAAGCCCTGATACACAGCAAACTCTTGATTAATCTCTATGATGAGCCGG  | HL437877 | 11401  | 0.77375     | 0.7389012  | 0.05609062  | -0.2986    | 0.7871136  | 0.14059597  |
| AMR2  | NM_020547 | 16684_R  | ACCTAAAAGCCCTGATACACAGCAAACTCTTGATTAATCTCTATGATGAGCCGG  | HL437877 | 2992   | 0.82428     | 0.7558184  | 0.006455    |            |            | 0.709295    |
| AMR2  | NM_020547 | 16684_R  | ACCTAAAAGCCCTGATACACAGCAAACTCTTGATTAATCTCTATGATGAGCCGG  | HL437877 | 8368   | 4.2735      | 0.97401017 | 0.00012575  | 0.6121     | 0.3810487  | 0.05170167  |
| AMR2  | NM_020547 | 16684_R  | ACCTAAAAGCCCTGATACACAGCAAACTCTTGATTAATCTCTATGATGAGCCGG  | HL437877 | 1374   | 3.3735      | 0.4475     | 0.3409587   | 0.107425   | 0.8388033  | 0.0056489   |
| AMR2  | NM_020547 | 16684_R  | ACCTAAAAGCCCTGATACACAGCAAACTCTTGATTAATCTCTATGATGAGCCGG  | HL437877 | 3000   | 5.03225     | 1.1908136  | 0.28502277  | 0.511725   | 0.7679364  | 0.0189977   |
| AMR2  | NM_020547 | 16684_R  | ACCTAAAAGCCCTGATACACAGCAAACTCTTGATTAATCTCTATGATGAGCCGG  | HL437877 | 8376   | 0.9929      | 0.802      | 0.3875      | 0.107425   | 0.8388033  | 0.0056489   |
| AMR2  | NM_020547 | 16684_R  | ACCTAAAAGCCCTGATACACAGCAAACTCTTGATTAATCTCTATGATGAGCCGG  | HL437877 | 13752  | 0.47175     | 0.9556251  | 0.28148402  | 0.13375    | 0.0610872  | 0.3010849   |
| AMR2  | NM_020547 | 16684_R  | ACCTAAAAGCCCTGATACACAGCAAACTCTTGATTAATCTCTATGATGAGCCGG  | HL437877 | 2994   | -0.31275    | 0.4220504  | 0.19346903  | 0.01072    | 0.4990565  | 0.09349423  |
| AMR2  | NM_020547 | 16684_R  | ACCTAAAAGCCCTGATACACAGCAAACTCTTGATTAATCTCTATGATGAGCCGG  | HL437877 | 8370   | 0.31475     | 0.5902732  | 0.2857007   | 0.1178     | 0.7681292  | 0.68543289  |
| AMR2  | NM_020547 | 16684_R  | ACCTAAAAGCCCTGATACACAGCAAACTCTTGATTAATCTCTATGATGAGCCGG  | HL437877 | 13746  | -0.1874     | 0.1915223  | 0.26391635  | -0.1231    | 0.6019216  | 0.68929587  |
| AMR2  | NM_020547 | 16684_R  | ACCTAAAAGCCCTGATACACAGCAAACTCTTGATTAATCTCTATGATGAGCCGG  | HL437877 | 2482   | 0.4953233   | 0.1100485  | 0.00014475  | 0.2432375  | 0.1180753  | 0.01183886  |
| AMR2  | NM_020547 | 16684_R  | ACCTAAAAGCCCTGATACACAGCAAACTCTTGATTAATCTCTATGATGAGCCGG  | HL437877 | 7858   | 0.56119     | 0.2498263  | 0.01120517  | 0.301285   | 1.8140679  | 0.02162655  |
| AMR2  | NM_020547 | 16684_R  | ACCTAAAAGCCCTGATACACAGCAAACTCTTGATTAATCTCTATGATGAGCCGG  | HL437877 | 1234   | 0.4953233   | 0.1100485  | 0.00014475  | 0.2432375  | 0.1180753  | 0.01183886  |
| AMR2  | NM_020547 | 16684_R  | ACCTAAAAGCCCTGATACACAGCAAACTCTTGATTAATCTCTATGATGAGCCGG  | HL437877 | 2486   | 0.60333     | 0.4488717  | 0.69628836  | 0.4074215  | 0.58139283 | 0.14718078  |
| AMR2  | NM_020547 | 16684_R  | ACCTAAAAGCCCTGATACACAGCAAACTCTTGATTAATCTCTATGATGAGCCGG  | HL437877 | 7842   | 0.804878    | 0.802488   | 0.802488    | 0.147812   | 0.4442131  | 0.19428826  |
| AMR2  | NM_020547 | 16684_R  | ACCTAAAAGCCCTGATACACAGCAAACTCTTGATTAATCTCTATGATGAGCCGG  | HL437877 | 13238  | -0.0017     | 0.5313036  | 0.17512941  | 0.3588625  | 0.58139283 | 0.14718078  |
| AMR2  | NM_020547 | 16684_R  | ACCTAAAAGCCCTGATACACAGCAAACTCTTGATTAATCTCTATGATGAGCCGG  | HL437877 |        |             |            |             |            |            |             |







|       |                   |                                                       |          |       |             |            |             |             |            |             |
|-------|-------------------|-------------------------------------------------------|----------|-------|-------------|------------|-------------|-------------|------------|-------------|
| BAC2  | A271878_301468_r  | ACCTAAAAGGAGCAACCTCCGGGAGATCTTGTAATCTCCCGGAACTCTCCGGC | HL289764 | 9166  | 0.994875    | 0.7793017  | 0.02884054  | 0.54595     | 0.4428717  | 0.06871951  |
| BAC2  | A271878_301468_r  | ACCTAAAAGGAGCAACCTCCGGGAGATCTTGTAATCTCCCGGAACTCTCCGGC | HL289764 | 9167  | 0.994875    | 0.7793017  | 0.02884054  | 0.43282     | 0.4293784  | 0.01618322  |
| BAC2  | A271878_302058_r  | ACCTAAAAGGAGCAACCTCCGGGAGATCTTGTAATCTCCCGGAACTCTCCGGC | HL289764 | 3788  | 0.5517125   | 0.2346931  | 0.01778501  | 0.520023    | 0.460345   | 0.06249268  |
| BAC2  | A271878_302058_r  | ACCTAAAAGGAGCAACCTCCGGGAGATCTTGTAATCTCCCGGAACTCTCCGGC | HL289764 | 3789  | 0.5517125   | 0.2346931  | 0.01778501  | 0.482725    | 0.4572762  | 0.00851137  |
| BAC2  | A271878_302058_r  | ACCTAAAAGGAGCAACCTCCGGGAGATCTTGTAATCTCCCGGAACTCTCCGGC | HL289764 | 14540 | 0.3598263   | 0.0995101  | 0.04467046  | 0.417631    | 0.3743816  | 0.11252011  |
| BAD   | NK_00432_30210_r  | ACCTAAAAGGAGCAACCTCCGGGAGATCTTGTAATCTCCCGGAACTCTCCGGC | HL270254 | 839   | 1.3022125   | 0.3902839  | 0.00122975  | -0.5402375  | 0.2162493  | 0.02320543  |
| BAD   | NK_00432_30210_r  | ACCTAAAAGGAGCAACCTCCGGGAGATCTTGTAATCTCCCGGAACTCTCCGGC | HL270254 | 8215  | 1.2773875   | 0.2978984  | 0.00071046  | -0.43081375 | 0.2764937  | 0.021246826 |
| BAD   | NK_00432_30210_r  | ACCTAAAAGGAGCAACCTCCGGGAGATCTTGTAATCTCCCGGAACTCTCCGGC | HL270254 | 11591 | 1.2929785   | 0.3902588  | 0.001115577 | -0.6288785  | 0.2531318  | 0.01997376  |
| BAD   | NK_00432_30210_r  | ACCTAAAAGGAGCAACCTCCGGGAGATCTTGTAATCTCCCGGAACTCTCCGGC | HL270254 | 2184  | 1.7412225   | 0.5229247  | 0.00011988  | -0.7603375  | 0.1361098  | 0.00979163  |
| BAD   | NK_00432_30210_r  | ACCTAAAAGGAGCAACCTCCGGGAGATCTTGTAATCTCCCGGAACTCTCCGGC | HL270254 | 7540  | -0.7959375  | 0.2942807  | 0.005691203 | -0.8777875  | 0.3120127  | 0.00375241  |
| BAD   | NK_00432_30210_r  | ACCTAAAAGGAGCAACCTCCGGGAGATCTTGTAATCTCCCGGAACTCTCCGGC | HL270254 | 12836 | -0.8020125  | 0.2807895  | 0.006562313 | -0.7885375  | 0.23440295 | 0.00765099  |
| BAD   | NK_00432_30210_r  | ACCTAAAAGGAGCAACCTCCGGGAGATCTTGTAATCTCCCGGAACTCTCCGGC | HL270254 | 13034 | 0.9696033   | 0.4860393  | 0.02767996  | 0.108435    | 0.0297715  | 0.02148484  |
| BAG1  | NK_00432_30468_r  | ACCTAAAAGGAGCAACCTCCGGGAGATCTTGTAATCTCCCGGAACTCTCCGGC | HL274884 | 8025  | 0.7915      | 0.4902749  | 0.049178    | 0.47798     | 0.3211366  | 0.001166129 |
| BAG1  | NK_00432_30468_r  | ACCTAAAAGGAGCAACCTCCGGGAGATCTTGTAATCTCCCGGAACTCTCCGGC | HL274884 | 13401 | 0.90875     | 0.5314825  | 0.03203906  | 0.648775    | 0.2872505  | 0.04974736  |
| BAG1  | NK_00432_30468_r  | ACCTAAAAGGAGCAACCTCCGGGAGATCTTGTAATCTCCCGGAACTCTCCGGC | HL274884 | 2647  | -0.1843875  | 0.4453845  | 0.03357242  | 0.4170611   | 0.3704161  | 0.008397979 |
| BAG1  | NK_00432_30468_r  | ACCTAAAAGGAGCAACCTCCGGGAGATCTTGTAATCTCCCGGAACTCTCCGGC | HL274884 | 8023  | -0.3038875  | 0.1455895  | 0.03046827  | 0.731825    | 0.5873474  | 0.03479648  |
| BAG1  | NK_00432_30468_r  | ACCTAAAAGGAGCAACCTCCGGGAGATCTTGTAATCTCCCGGAACTCTCCGGC | HL274884 | 13399 | -0.1665275  | 0.2142761  | 0.06973287  | 0.4170611   | 0.3704161  | 0.008397979 |
| BAG1  | NK_00432_30468_r  | ACCTAAAAGGAGCAACCTCCGGGAGATCTTGTAATCTCCCGGAACTCTCCGGC | HL274884 | 8025  | -0.1054466  | 0.35991465 | 0.00893706  | 0.803225    | 0.4297564  | 0.01420094  |
| BAG1  | NK_00432_30468_r  | ACCTAAAAGGAGCAACCTCCGGGAGATCTTGTAATCTCCCGGAACTCTCCGGC | HL274884 | 8021  | -0.9526375  | 0.1007706  | 0.00136239  | -0.4848     | 0.481555   | 0.00059862  |
| BAG1  | NK_00432_30468_r  | ACCTAAAAGGAGCAACCTCCGGGAGATCTTGTAATCTCCCGGAACTCTCCGGC | HL274884 | 13397 | -0.2952875  | 0.1654464  | 0.00074685  | 0.612575    | 0.2641559  | 0.02388396  |
| BAG3  | NK_00428_301665_r | ACCTAAAAGGAGCAACCTCCGGGAGATCTTGTAATCTCCCGGAACTCTCCGGC | HL591924 | 2643  | -0.8188785  | 0.3177913  | 0.0044223   | 0.061675    | 0.12148927 | 0.76338801  |
| BAG3  | NK_00428_301665_r | ACCTAAAAGGAGCAACCTCCGGGAGATCTTGTAATCTCCCGGAACTCTCCGGC | HL591924 | 8019  | -0.7978975  | 0.2624323  | 0.000771871 | 0.003025    | 0.1908287  | 0.99697862  |
| BAG3  | NK_00428_301665_r | ACCTAAAAGGAGCAACCTCCGGGAGATCTTGTAATCTCCCGGAACTCTCCGGC | HL591924 | 13395 | -0.7738875  | 0.2559161  | 0.00410351  | 0.051825    | 0.1623622  | 0.80911339  |
| BAG3  | NK_00428_301665_r | ACCTAAAAGGAGCAACCTCCGGGAGATCTTGTAATCTCCCGGAACTCTCCGGC | HL591924 | 1294  | 1.4048475   | 0.7902594  | 0.000749045 | 0.4568      | 0.2604766  | 0.00210025  |
| BAG3  | NK_00428_301665_r | ACCTAAAAGGAGCAACCTCCGGGAGATCTTGTAATCTCCCGGAACTCTCCGGC | HL591924 | 6669  | 1.4315375   | 0.8017333  | 0.08887554  | 0.490375    | 0.3129227  | 0.06149667  |
| BAG3  | NK_00428_301665_r | ACCTAAAAGGAGCAACCTCCGGGAGATCTTGTAATCTCCCGGAACTCTCCGGC | HL591924 | 12945 | 1.0451125   | 0.3923453  | 0.00086811  | -0.131375   | 1.039419   | 0.76346216  |
| BAG3  | NK_00428_301665_r | ACCTAAAAGGAGCAACCTCCGGGAGATCTTGTAATCTCCCGGAACTCTCCGGC | HL591924 | 1294  | -0.42738333 | 0.0926033  | 0.34841625  | -0.131375   | 1.039419   | 0.76346216  |
| BAG3  | NK_00428_301665_r | ACCTAAAAGGAGCAACCTCCGGGAGATCTTGTAATCTCCCGGAACTCTCCGGC | HL591924 | 6670  | -0.4686847  | 0.1324769  | 0.3814812   | -0.1365     | 1.023774   | 0.8027415   |
| BAG3  | NK_00428_301665_r | ACCTAAAAGGAGCAACCTCCGGGAGATCTTGTAATCTCCCGGAACTCTCCGGC | HL591924 | 12046 | -0.4904125  | 0.0349343  | 0.19101318  | -0.12875    | 1.0154127  | 0.75100576  |
| BAG4  | NK_00474_301312_r | ACCTAAAAGGAGCAACCTCCGGGAGATCTTGTAATCTCCCGGAACTCTCCGGC | HL194726 | 2641  | -0.4712166  | 0.1307849  | 0.04307729  | 0.25515     | 0.2819782  | 0.3283019   |
| BAG4  | NK_00474_301312_r | ACCTAAAAGGAGCAACCTCCGGGAGATCTTGTAATCTCCCGGAACTCTCCGGC | HL194726 | 8017  | -0.5335     | 0.1738777  | 0.03608919  | -0.15225    | 0.1023388  | 0.271366024 |
| BAG4  | NK_00474_301312_r | ACCTAAAAGGAGCAACCTCCGGGAGATCTTGTAATCTCCCGGAACTCTCCGGC | HL194726 | 13393 | -0.62765    | 0.1580436  | 0.02048263  | -0.15225    | 0.1457311  | 0.35279749  |
| BAG4  | NK_00474_301312_r | ACCTAAAAGGAGCAACCTCCGGGAGATCTTGTAATCTCCCGGAACTCTCCGGC | HL194726 | 1292  | 0.8076925   | 0.7095762  | 0.00000001  | -0.15629    | 0.5294964  | 0.27070339  |
| BAG4  | NK_00474_301312_r | ACCTAAAAGGAGCAACCTCCGGGAGATCTTGTAATCTCCCGGAACTCTCCGGC | HL194726 | 6668  | 0.8488875   | 0.7456347  | 0.04909176  | -0.2828     | 0.5982871  | 0.33494904  |
| BAG4  | NK_00474_301312_r | ACCTAAAAGGAGCAACCTCCGGGAGATCTTGTAATCTCCCGGAACTCTCCGGC | HL194726 | 8064  | 0.92475     | 0.2993455  | 0.00000001  | -0.2828     | 0.5982871  | 0.33494904  |
| BAG4  | NK_00474_301312_r | ACCTAAAAGGAGCAACCTCCGGGAGATCTTGTAATCTCCCGGAACTCTCCGGC | HL194726 | 2615  | 2.217375    | 0.9147633  | 0.00213648  | 0.9678      | 1.3657245  | 0.10987663  |
| BAG4  | NK_00474_301312_r | ACCTAAAAGGAGCAACCTCCGGGAGATCTTGTAATCTCCCGGAACTCTCCGGC | HL194726 | 7991  | 2.2640125   | 0.9105174  | 0.0012932   | 0.0429      | 1.3496262  | 0.1041124   |
| BAG4  | NK_00474_301312_r | ACCTAAAAGGAGCAACCTCCGGGAGATCTTGTAATCTCCCGGAACTCTCCGGC | HL194726 | 13367 | 1.1741625   | 0.8338047  | 0.00146549  | 0.9087      | 1.0073407  | 0.00073407  |
| BAG4  | NK_00474_301312_r | ACCTAAAAGGAGCAACCTCCGGGAGATCTTGTAATCTCCCGGAACTCTCCGGC | HL194726 | 805   | -0.4788785  | 0.4347914  | 0.00030871  | -0.770385   | 0.4680842  | 0.01234854  |
| BAG4  | NK_00474_301312_r | ACCTAAAAGGAGCAACCTCCGGGAGATCTTGTAATCTCCCGGAACTCTCCGGC | HL194726 | 6181  | -0.7007375  | 0.3993794  | 0.0001495   | -0.8613875  | 0.4809248  | 0.00180002  |
| BAG4  | NK_00474_301312_r | ACCTAAAAGGAGCAACCTCCGGGAGATCTTGTAATCTCCCGGAACTCTCCGGC | HL194726 | 11557 | -1.5020375  | 0.5145032  | 0.00143023  | -0.8079875  | 0.4204929  | 0.01300472  |
| BAG4  | NK_00474_301312_r | ACCTAAAAGGAGCAACCTCCGGGAGATCTTGTAATCTCCCGGAACTCTCCGGC | HL194726 | 1889  | -1.8802925  | 0.9997043  | 0.00000001  | -0.8079875  | 0.4204929  | 0.01300472  |
| BAG4  | NK_00474_301312_r | ACCTAAAAGGAGCAACCTCCGGGAGATCTTGTAATCTCCCGGAACTCTCCGGC | HL194726 | 6181  | -1.37885    | 0.6457362  | 0.02939602  | -0.8079875  | 0.4204929  | 0.01300472  |
| BAG4  | NK_00474_301312_r | ACCTAAAAGGAGCAACCTCCGGGAGATCTTGTAATCTCCCGGAACTCTCCGGC | HL194726 | 11558 | -1.7272     | 0.6543769  | 0.03114967  | -0.8079875  | 0.4204929  | 0.01300472  |
| BAG4  | NK_00474_301312_r | ACCTAAAAGGAGCAACCTCCGGGAGATCTTGTAATCTCCCGGAACTCTCCGGC | HL194726 | 2162  | 3.204       | 0.00000001 | 0.00000001  | -0.9223     | 0.00000001 | 0.00000001  |
| BAG4  | NK_00474_301312_r | ACCTAAAAGGAGCAACCTCCGGGAGATCTTGTAATCTCCCGGAACTCTCCGGC | HL194726 | 7538  | 3.0679      | 0.00000001 | 0.00000001  | -0.9223     | 0.00000001 | 0.00000001  |
| BAG4  | NK_00474_301312_r | ACCTAAAAGGAGCAACCTCCGGGAGATCTTGTAATCTCCCGGAACTCTCCGGC | HL194726 | 12914 | 1.8469      | 0.00000001 | 0.00000001  | -0.9223     | 0.00000001 | 0.00000001  |
| BANK1 | BC032241_30488_r  | ACCTAAAAGGAGCAACCTCCGGGAGATCTTGTAATCTCCCGGAACTCTCCGGC | HL480400 | 15277 | 2.0478      | 0.4909816  | 0.29613018  | 0.52405     | 0.1479238  | 0.01172799  |
| BANK1 | BC032241_30488_r  | ACCTAAAAGGAGCAACCTCCGGGAGATCTTGTAATCTCCCGGAACTCTCCGGC | HL480400 | 4532  | 0.20936667  | 0.5819301  | 0.51003526  | -0.3866667  | 0.7077478  | 0.30999785  |
| BANK1 | BC032241_30488_r  | ACCTAAAAGGAGCAACCTCCGGGAGATCTTGTAATCTCCCGGAACTCTCCGGC | HL480400 | 9901  | 0.36115     | 0.4564558  | 0.15954371  | 0.5522      | 0.3750444  | 0.17799977  |
| BANK1 | BC032241_30488_r  | ACCTAAAAGGAGCAACCTCCGGGAGATCTTGTAATCTCCCGGAACTCTCCGGC | HL480400 | 15277 | 0.1554      | 0.3803761  | 0.7053214   | 0.5075994   | 0.3075994  | 0.15073     |
| BANK1 | BC032241_30488_r  | ACCTAAAAGGAGCAACCTCCGGGAGATCTTGTAATCTCCCGGAACTCTCCGGC | HL480400 | 9899  | -0.0783     | 0.9235251  | 0.85385535  | 0.03395     | 0.5584146  | 0.84582873  |
| BANK1 | BC032241_30488_r  | ACCTAAAAGGAGCAACCTCCGGGAGATCTTGTAATCTCCCGGAACTCTCCGGC | HL480400 | 15273 | -0.077      | 0.0667599  | 0.449388291 | 0.088475    | 0.4959949  | 0.74430718  |
| BANK1 | BC032241_30488_r  | ACCTAAAAGGAGCAACCTCCGGGAGATCTTGTAATCTCCCGGAACTCTCCGGC | HL480400 | 1290  | -0.7731     | 0.00000001 | 0.00000001  | -0.7802333  | 0.2206576  | 0.03217469  |
| BANK1 | BC032241_30488_r  | ACCTAAAAGGAGCAACCTCCGGGAGATCTTGTAATCTCCCGGAACTCTCCGGC | HL480400 | 15277 | -0.1276     | 0.00000001 | 0.00000001  | -0.7802333  | 0.2206576  | 0.03217469  |
| BANK1 | BC032241_30488_r  | ACCTAAAAGGAGCAACCTCCGGGAGATCTTGTAATCTCCCGGAACTCTCCGGC | HL480400 | 1291  | 0.189265    | 0.7761903  | 0.668172097 | 0.15673     | 0.4347494  | 0.13179304  |
| BANK1 | BC032241_30488_r  | ACCTAAAAGGAGCAACCTCCGGGAGATCTTGTAATCTCCCGGAACTCTCCGGC | HL480400 | 6617  | 0.2764375   | 0.64834    | 0.00000001  | 0.10037     | 0.5191497  | 0.164929312 |
| BANK1 | BC032241_30488_r  | ACCTAAAAGGAGCAACCTCCGGGAGATCTTGTAATCTCCCGGAACTCTCCGGC | HL480400 | 9899  | -0.0783     | 0.9235251  | 0.85385535  | 0.03395     | 0.5584146  | 0.84582873  |
| BANK1 | BC032241_30488_r  | ACCTAAAAGGAGCAACCTCCGGGAGATCTTGTAATCTCCCGGAACTCTCCGGC | HL480400 | 15273 | -0.077      | 0.0667599  | 0.449388291 | 0.088475    | 0.4959949  | 0.74430718  |
| BANK1 | BC032241_30488_r  | ACCTAAAAGGAGCAACCTCCGGGAGATCTTGTAATCTCCCGGAACTCTCCGGC | HL480400 | 1290  | -0.7731     | 0.00000001 | 0.00000001  | -0.7802333  | 0.2206576  | 0.03217469  |
| BANK1 | BC032241_30488_r  | ACCTAAAAGGAGCAACCTCCGGGAGATCTTGTAATCTCCCGGAACTCTCCGGC | HL480400 | 15277 | -0.1276     | 0.00000001 | 0.00000001  | -0.7802333  | 0.2206576  | 0.03217469  |
| BANK1 | BC032241_30488_r  | ACCTAAAAGGAGCAACCTCCGGGAGATCTTGTAATCTCCCGGAACTCTCCGGC | HL480400 | 1291  | 0.189265    | 0.7761903  | 0.668172097 | 0.15673     | 0.4347494  | 0.13179304  |
| BANK1 | BC032241_30488_r  | ACCTAAAAGGAGCAACCTCCGGGAGATCTTGTAATCTCCCGGAACTCTCCGGC | HL480400 | 6617  | 0.2764375   | 0.64834    | 0.00000001  | 0.10037     | 0.5191497  | 0.164929312 |
| BANK1 | BC032241_30488_r  | ACCTAAAAGGAGCAACCTCCGGGAGATCTTGTAATCTCCCGGAACTCTCCGGC | HL480400 | 9899  | -0.0783     | 0.9235251  | 0.85385535  | 0.03395     | 0.5584146  | 0.84582873  |
| BANK1 | BC032241_30488_r  | ACCTAAAAGGAGCAACCTCCGGGAGATCTTGTAATCTCCCGGAACTCTCCGGC | HL480400 | 15273 | -0.077      | 0.0667599  | 0.449388291 | 0.088475    | 0.4959949  | 0.74430718  |
| BANK1 | BC032241_30488_r  | ACCTAAAAGGAGCAACCTCCGGGAGATCTTGTAATCTCCCGGAACTCTCCGGC | HL480400 | 1290  | -0.7731     | 0.00000001 | 0.00000001  | -0.7802333  | 0.2206576  | 0.03217469  |
| BANK1 | BC032241_30488_r  | ACCTAAAAGGAGCAACCTCCGGGAGATCTTGTAATCTCCCGGAACTCTCCGGC | HL480400 | 15277 | -0.1276     | 0.00000001 | 0.00000001  | -0.7802333  | 0.2206576  | 0.03217469  |
| BANK1 | BC032241_30488_r  | ACCTAAAAGGAGCAACCTCCGGGAGATCTTGTAATCTCCCGGAACTCTCCGGC | HL480400 | 1291  | 0.189265    | 0.7761903  | 0.668172097 | 0.15673     | 0.4347494  | 0.13179304  |
| BANK1 | BC032241_30488_r  | ACCTAAAAGGAGCAACCTCCGGGAGATCTTGTAATCTCCCGGAACTCTCCGGC | HL480400 | 6617  | 0.2764375   | 0.64834    | 0.00000001  | 0.10037     | 0.5191497  | 0.164929312 |
| BANK1 | BC032241_30488_r  | ACCTAAAAGGAGCAACCTCCGGGAGATCTTGTAATCTCCCGGAACTCTCCGGC | HL480400 | 9899  | -0.0783     | 0.9235251  | 0.85385535  | 0.03395     | 0.5584146  | 0.84582873  |
| BANK1 | BC032241_30488_r  | ACCTAAAAGGAGCAACCTCCGGGAGATCTTGTAATCTCCCGGAACTCTCCGGC | HL480400 | 15273 | -0.077      | 0.0667599  | 0.449388291 | 0.088475    | 0.4959949  | 0.74430718  |
| BANK1 | BC032241_30488_r  | ACCTAAAAGGAGCAACCTCCGGGAGATCTTGTAATCTCCCGGAACTCTCCGGC | HL480400 | 1290  | -0.7731     | 0.00000001 | 0.00000001  | -0.7802333  | 0.2206576  | 0.03217469  |
| BANK1 | BC032241_30488_r  | ACCTAAAAGGAGCAACCTCCGGGAGATCTTGTAATCTCCCGGAACTCTCCGGC | HL480400 | 15277 | -0.1276     | 0.00000001 | 0.00000001  | -0.7802333  | 0.2206576  | 0.032       |

|       |                   |                                                          |          |       |            |           |            |  |            |            |            |             |           |             |            |           |             |
|-------|-------------------|----------------------------------------------------------|----------|-------|------------|-----------|------------|--|------------|------------|------------|-------------|-----------|-------------|------------|-----------|-------------|
| BCL10 | NK_00296_16994.R  | ACCTAAAGCCCAACTGTGACCACTAAATCTTGAAATTTGGTGTGACATGCGGGG   | HL283672 | 882   | -0.4784625 | 0.4470256 | 0.00975487 |  | 0.94276667 | 1.0549855  | 0.08639938 | 0.22305     | 0.3645135 | 0.54886206  | 0.18003333 | 0.2166858 | 0.27319134  |
| BCL10 | NK_00296_16994.R  | ACCTAAAGCCCAACTGTGACCACTAAATCTTGAAATTTGGTGTGACATGCGGGG   | HL283672 | 883   | -0.4784625 | 0.4470256 | 0.00975487 |  | 1.14056667 | 1.0549855  | 0.08639938 | 0.22305     | 0.3645135 | 0.54886206  | 0.18003333 | 0.2166858 | 0.27319134  |
| BCL10 | NK_00296_16994.R  | ACCTAAAGCCCAACTGTGACCACTAAATCTTGAAATTTGGTGTGACATGCGGGG   | HL283672 | 628   | -0.8201875 | 0.4705766 | 0.01420221 |  | 0.2423     | 0.4545473  | 0.38089349 | -0.409      | 0.2349932 | 0.09564342  | -0.24232   | 0.3113836 | 0.21330108  |
| BCL10 | NK_00296_16976.R  | ACCTAAAGCCCAACTGTGACCACTAAATCTTGAAATTTGGTGTGACATGCGGGG   | HL283672 | 240   | 1.8796125  | 0.4144882 | 0.00438634 |  | 0.1914925  | 1.0488514  | 0.00647893 | 0.883       | 0.3281226 | 0.00949605  | 1.21125    | 0.5597331 | 0.02274687  |
| BCL10 | NK_00296_16976.R  | ACCTAAAGCCCAACTGTGACCACTAAATCTTGAAATTTGGTGTGACATGCGGGG   | HL283672 | 7640  | 0.0799875  | 0.4341386 | 0.016106   |  | 0.3529785  | 0.3741518  | 0.1711165  | 0.08252     | 0.2057225 | 0.7994781   | 0.05825    | 0.1483781 | 0.42326377  |
| BCL10 | NK_00296_16976.R  | ACCTAAAGCCCAACTGTGACCACTAAATCTTGAAATTTGGTGTGACATGCGGGG   | HL283672 | 13016 | 0.0721625  | 0.4164882 | 0.016106   |  | 0.200875   | 0.5681128  | 0.2312375  | 0.00825     | 0.2444992 | 0.53879561  | 0.21125    | 0.5431881 | 0.04118567  |
| BCL10 | NK_00296_16976.R  | ACCTAAAGCCCAACTGTGACCACTAAATCTTGAAATTTGGTGTGACATGCGGGG   | HL283672 | 882   | 0.8788262  | 0.4144882 | 0.00438634 |  | 0.1914925  | 1.0488514  | 0.00647893 | 0.883       | 0.3281226 | 0.00949605  | 1.21125    | 0.5597331 | 0.02274687  |
| BCL10 | NK_00296_16986.R  | ACCTAAAGCCCAACTGTGACCACTAAATCTTGAAATTTGGTGTGACATGCGGGG   | HL283672 | 6239  | 1.8796125  | 0.4144882 | 0.00438634 |  | 0.1914925  | 1.0488514  | 0.00647893 | 0.883       | 0.3281226 | 0.00949605  | 1.21125    | 0.5597331 | 0.02274687  |
| BCL10 | NK_00296_16986.R  | ACCTAAAGCCCAACTGTGACCACTAAATCTTGAAATTTGGTGTGACATGCGGGG   | HL283672 | 1162  | 0.0721625  | 0.4144882 | 0.00438634 |  | 0.1914925  | 1.0488514  | 0.00647893 | 0.883       | 0.3281226 | 0.00949605  | 1.21125    | 0.5597331 | 0.02274687  |
| BCL11 | NK_13822_161586.R | ACCTAAAGCCCAACTGTGACCACTAAATCTTGAAATTTGGTGTGACATGCGGGG   | HL591553 | 1945  | -0.2783735 | 0.4287772 | 0.0036191  |  | 0.731255   | 1.1482321  | 0.00649439 | 0.1065      | 0.3502299 | 0.03651287  | 0.1981     | 0.3045629 | 0.311865831 |
| BCL11 | NK_13822_161586.R | ACCTAAAGCCCAACTGTGACCACTAAATCTTGAAATTTGGTGTGACATGCGGGG   | HL591553 | 731   | -0.2783735 | 0.4287772 | 0.0036191  |  | 0.731255   | 1.1482321  | 0.00649439 | 0.1065      | 0.3502299 | 0.03651287  | 0.1981     | 0.3045629 | 0.311865831 |
| BCL11 | NK_13822_161586.R | ACCTAAAGCCCAACTGTGACCACTAAATCTTGAAATTTGGTGTGACATGCGGGG   | HL591553 | 12697 | -0.2068765 | 0.6069264 | 0.0006215  |  | 0.72075    | 0.4497972  | 0.02796685 | 0.5636      | 0.22825   | 0.1197504   | 0.02141435 | 0.376225  | 0.54892958  |
| BCL11 | NK_13822_161586.R | ACCTAAAGCCCAACTGTGACCACTAAATCTTGAAATTTGGTGTGACATGCGGGG   | HL591553 | 1947  | -0.0206265 | 0.1611274 | 0.99811803 |  | -0.6240875 | 0.3773225  | 0.05219808 | 0.649775    | 0.4810241 | 0.077983275 | 0.10228    | 0.3039863 | 0.42426734  |
| BCL11 | NK_13822_161586.R | ACCTAAAGCCCAACTGTGACCACTAAATCTTGAAATTTGGTGTGACATGCGGGG   | HL591553 | 733   | -0.0146428 | 0.1641720 | 0.99811803 |  | 0.9139126  | 0.54298    | 0.0053262  | 0.89031     | 0.4706048 | 0.04124739  | 0.1328     | 0.338925  | 0.48802979  |
| BCL11 | NK_13822_161586.R | ACCTAAAGCCCAACTGTGACCACTAAATCTTGAAATTTGGTGTGACATGCGGGG   | HL591553 | 12699 | 0.0130875  | 0.1246644 | 0.92812676 |  | -0.6262625 | 0.5247811  | 0.0053796  | 0.794735    | 0.4942041 | 0.059129187 | 0.1879     | 0.3219972 | 0.364481336 |
| BCL11 | NK_13822_161586.R | ACCTAAAGCCCAACTGTGACCACTAAATCTTGAAATTTGGTGTGACATGCGGGG   | HL591553 | 930   | 0.5258875  | 0.2024507 | 0.0279877  |  | 0.6452369  | 0.40539997 | 0.0126956  | 0.68283     | 0.3964636 | 0.0414699   | 0.52661    | 0.3053632 | 0.03358141  |
| BCL11 | NK_13822_161586.R | ACCTAAAGCCCAACTGTGACCACTAAATCTTGAAATTTGGTGTGACATGCGGGG   | HL591553 | 6306  | 0.5178625  | 0.3437148 | 0.03819721 |  | 0.2308375  | 0.2640936  | 0.0094347  | 0.7045      | 0.3705001 | 0.03293246  | 0.546735   | 0.3025174 | 0.02578149  |
| BCL11 | NK_13822_161586.R | ACCTAAAGCCCAACTGTGACCACTAAATCTTGAAATTTGGTGTGACATGCGGGG   | HL591553 | 1162  | 0.5121875  | 0.379599  | 0.0430951  |  | 0.8262625  | 1.3647366  | 0.04865342 | 0.7045      | 0.3705001 | 0.03293246  | 0.546735   | 0.3025174 | 0.02578149  |
| BCL11 | NK_13822_161586.R | ACCTAAAGCCCAACTGTGACCACTAAATCTTGAAATTTGGTGTGACATGCGGGG   | HL591553 | 12697 | 0.2594875  | 0.6250184 | 4.90E-05   |  | 0.8262625  | 1.3647366  | 0.04865342 | 0.7045      | 0.3705001 | 0.03293246  | 0.546735   | 0.3025174 | 0.02578149  |
| BCL11 | NK_13822_161586.R | ACCTAAAGCCCAACTGTGACCACTAAATCTTGAAATTTGGTGTGACATGCGGGG   | HL591553 | 7325  | 3.9493875  | 0.7440788 | 7.34E-05   |  | 0.8262625  | 1.3647366  | 0.04865342 | 0.7045      | 0.3705001 | 0.03293246  | 0.546735   | 0.3025174 | 0.02578149  |
| BCL11 | NK_13822_161586.R | ACCTAAAGCCCAACTGTGACCACTAAATCTTGAAATTTGGTGTGACATGCGGGG   | HL591553 | 12697 | 0.193875   | 0.8180549 | 8.83E-05   |  | 0.8262625  | 1.3647366  | 0.04865342 | 0.7045      | 0.3705001 | 0.03293246  | 0.546735   | 0.3025174 | 0.02578149  |
| BCL11 | NK_13822_161586.R | ACCTAAAGCCCAACTGTGACCACTAAATCTTGAAATTTGGTGTGACATGCGGGG   | HL591553 | 931   | 0.6975125  | 0.7394803 | 0.07679326 |  | 0.704785   | 0.1491166  | 0.17153134 | -0.3115     | 0.1197504 | 0.02141435  | 0.376225   | 0.8097051 | 0.42061321  |
| BCL11 | NK_13822_161586.R | ACCTAAAGCCCAACTGTGACCACTAAATCTTGAAATTTGGTGTGACATGCGGGG   | HL591553 | 6307  | 0.6621375  | 0.7484451 | 0.08651945 |  | 0.7862625  | 1.4473889  | 0.0297188  | 0.704785    | 0.1491166 | 0.17153134  | -0.3115    | 0.1197504 | 0.41655     |
| BCL11 | NK_13822_161586.R | ACCTAAAGCCCAACTGTGACCACTAAATCTTGAAATTTGGTGTGACATGCGGGG   | HL591553 | 1162  | 0.9961375  | 0.7079374 | 0.08473638 |  | 0.704785   | 0.1491166  | 0.17153134 | -0.3115     | 0.1197504 | 0.02141435  | 0.376225   | 0.8097051 | 0.42061321  |
| BCL11 | NK_13822_161586.R | ACCTAAAGCCCAACTGTGACCACTAAATCTTGAAATTTGGTGTGACATGCGGGG   | HL591553 | 1951  | 0.20265    | 0.5447773 | 0.00620948 |  | 0.6532625  | 0.9204971  | 0.0594941  | 1.0073666   | 0.9967498 | 0.22333207  | 0.02975    | 0.1065489 | 0.93662986  |
| BCL11 | NK_13822_161586.R | ACCTAAAGCCCAACTGTGACCACTAAATCTTGAAATTTGGTGTGACATGCGGGG   | HL591553 | 7327  | 2.487      | 1.1657384 | 0.01889786 |  | 0.719375   | 0.5042163  | 0.02899438 | 1.003466667 | 0.9956955 | 0.202554946 | 0.02975    | 0.1065489 | 0.93662986  |
| BCL11 | NK_13822_161586.R | ACCTAAAGCCCAACTGTGACCACTAAATCTTGAAATTTGGTGTGACATGCGGGG   | HL591553 | 12703 | 2.489      | 1.1658211 | 0.01889786 |  | 0.719375   | 0.5042163  | 0.02899438 | 1.003466667 | 0.9956955 | 0.202554946 | 0.02975    | 0.1065489 | 0.93662986  |
| BCL11 | NK_13822_161586.R | ACCTAAAGCCCAACTGTGACCACTAAATCTTGAAATTTGGTGTGACATGCGGGG   | HL591553 | 12703 | 2.489      | 1.1658211 | 0.01889786 |  | 0.719375   | 0.5042163  | 0.02899438 | 1.003466667 | 0.9956955 | 0.202554946 | 0.02975    | 0.1065489 | 0.93662986  |
| BCL11 | NK_13822_161586.R | ACCTAAAGCCCAACTGTGACCACTAAATCTTGAAATTTGGTGTGACATGCGGGG   | HL591553 | 12703 | 2.489      | 1.1658211 | 0.01889786 |  | 0.719375   | 0.5042163  | 0.02899438 | 1.003466667 | 0.9956955 | 0.202554946 | 0.02975    | 0.1065489 | 0.93662986  |
| BCL11 | NK_13822_161586.R | ACCTAAAGCCCAACTGTGACCACTAAATCTTGAAATTTGGTGTGACATGCGGGG   | HL591553 | 12703 | 2.489      | 1.1658211 | 0.01889786 |  | 0.719375   | 0.5042163  | 0.02899438 | 1.003466667 | 0.9956955 | 0.202554946 | 0.02975    | 0.1065489 | 0.93662986  |
| BCL11 | NK_13822_161586.R | ACCTAAAGCCCAACTGTGACCACTAAATCTTGAAATTTGGTGTGACATGCGGGG   | HL591553 | 12703 | 2.489      | 1.1658211 | 0.01889786 |  | 0.719375   | 0.5042163  | 0.02899438 | 1.003466667 | 0.9956955 | 0.202554946 | 0.02975    | 0.1065489 | 0.93662986  |
| BCL11 | NK_13822_161586.R | ACCTAAAGCCCAACTGTGACCACTAAATCTTGAAATTTGGTGTGACATGCGGGG   | HL591553 | 12703 | 2.489      | 1.1658211 | 0.01889786 |  | 0.719375   | 0.5042163  | 0.02899438 | 1.003466667 | 0.9956955 | 0.202554946 | 0.02975    | 0.1065489 | 0.93662986  |
| BCL11 | NK_13822_161586.R | ACCTAAAGCCCAACTGTGACCACTAAATCTTGAAATTTGGTGTGACATGCGGGG   | HL591553 | 12703 | 2.489      | 1.1658211 | 0.01889786 |  | 0.719375   | 0.5042163  | 0.02899438 | 1.003466667 | 0.9956955 | 0.202554946 | 0.02975    | 0.1065489 | 0.93662986  |
| BCL11 | NK_13822_161586.R | ACCTAAAGCCCAACTGTGACCACTAAATCTTGAAATTTGGTGTGACATGCGGGG   | HL591553 | 12703 | 2.489      | 1.1658211 | 0.01889786 |  | 0.719375   | 0.5042163  | 0.02899438 | 1.003466667 | 0.9956955 | 0.202554946 | 0.02975    | 0.1065489 | 0.93662986  |
| BCL11 | NK_13822_161586.R | ACCTAAAGCCCAACTGTGACCACTAAATCTTGAAATTTGGTGTGACATGCGGGG   | HL591553 | 12703 | 2.489      | 1.1658211 | 0.01889786 |  | 0.719375   | 0.5042163  | 0.02899438 | 1.003466667 | 0.9956955 | 0.202554946 | 0.02975    | 0.1065489 | 0.93662986  |
| BCL11 | NK_13822_161586.R | ACCTAAAGCCCAACTGTGACCACTAAATCTTGAAATTTGGTGTGACATGCGGGG   | HL591553 | 12703 | 2.489      | 1.1658211 | 0.01889786 |  | 0.719375   | 0.5042163  | 0.02899438 | 1.003466667 | 0.9956955 | 0.202554946 | 0.02975    | 0.1065489 | 0.93662986  |
| BCL11 | NK_13822_161586.R | ACCTAAAGCCCAACTGTGACCACTAAATCTTGAAATTTGGTGTGACATGCGGGG   | HL591553 | 12703 | 2.489      | 1.1658211 | 0.01889786 |  | 0.719375   | 0.5042163  | 0.02899438 | 1.003466667 | 0.9956955 | 0.202554946 | 0.02975    | 0.1065489 | 0.93662986  |
| BCL11 | NK_13822_161586.R | ACCTAAAGCCCAACTGTGACCACTAAATCTTGAAATTTGGTGTGACATGCGGGG   | HL591553 | 12703 | 2.489      | 1.1658211 | 0.01889786 |  | 0.719375   | 0.5042163  | 0.02899438 | 1.003466667 | 0.9956955 | 0.202554946 | 0.02975    | 0.1065489 | 0.93662986  |
| BCL11 | NK_13822_161586.R | ACCTAAAGCCCAACTGTGACCACTAAATCTTGAAATTTGGTGTGACATGCGGGG   | HL591553 | 12703 | 2.489      | 1.1658211 | 0.01889786 |  | 0.719375   | 0.5042163  | 0.02899438 | 1.003466667 | 0.9956955 | 0.202554946 | 0.02975    | 0.1065489 | 0.93662986  |
| BCL11 | NK_13822_161586.R | ACCTAAAGCCCAACTGTGACCACTAAATCTTGAAATTTGGTGTGACATGCGGGG   | HL591553 | 12703 | 2.489      | 1.1658211 | 0.01889786 |  | 0.719375   | 0.5042163  | 0.02899438 | 1.003466667 | 0.9956955 | 0.202554946 | 0.02975    | 0.1065489 | 0.93662986  |
| BCL11 | NK_13822_161586.R | ACCTAAAGCCCAACTGTGACCACTAAATCTTGAAATTTGGTGTGACATGCGGGG   | HL591553 | 12703 | 2.489      | 1.1658211 | 0.01889786 |  | 0.719375   | 0.5042163  | 0.02899438 | 1.003466667 | 0.9956955 | 0.202554946 | 0.02975    | 0.1065489 | 0.93662986  |
| BCL11 | NK_13822_161586.R | ACCTAAAGCCCAACTGTGACCACTAAATCTTGAAATTTGGTGTGACATGCGGGG   | HL591553 | 12703 | 2.489      | 1.1658211 | 0.01889786 |  | 0.719375   | 0.5042163  | 0.02899438 | 1.003466667 | 0.9956955 | 0.202554946 | 0.02975    | 0.1065489 | 0.93662986  |
| BCL11 | NK_13822_161586.R | ACCTAAAGCCCAACTGTGACCACTAAATCTTGAAATTTGGTGTGACATGCGGGG   | HL591553 | 12703 | 2.489      | 1.1658211 | 0.01889786 |  | 0.719375   | 0.5042163  | 0.02899438 | 1.003466667 | 0.9956955 | 0.202554946 | 0.02975    | 0.1065489 | 0.93662986  |
| BCL11 | NK_13822_161586.R | ACCTAAAGCCCAACTGTGACCACTAAATCTTGAAATTTGGTGTGACATGCGGGG   | HL591553 | 12703 | 2.489      | 1.1658211 | 0.01889786 |  | 0.719375   | 0.5042163  | 0.02899438 | 1.003466667 | 0.9956955 | 0.202554946 | 0.02975    | 0.1065489 | 0.93662986  |
| BCL11 | NK_13822_161586.R | ACCTAAAGCCCAACTGTGACCACTAAATCTTGAAATTTGGTGTGACATGCGGGG</ |          |       |            |           |            |  |            |            |            |             |           |             |            |           |             |









|        |                   |                                                         |          |       |            |             |             |             |            |             |
|--------|-------------------|---------------------------------------------------------|----------|-------|------------|-------------|-------------|-------------|------------|-------------|
| CANMG0 | NM_172171_16102_R | ACCTAAAAGGCTCGATGTGTGATCTTCTTCTTGAAGAAGTGGACATCCAGCGGCG | HL523465 | 11493 | -0.1095    | 0.6821589   | 0.02674063  | -0.486975   | 0.24284107 | 0.034652931 |
| CANMG0 | NM_172171_16102_R | ACCTAAAAGGCTCGATGTGTGATCTTCTTCTTGAAGAAGTGGACATCCAGCGGCG | HL523465 | 2257  | 0.2867     | 0.3304914   | 0.01016     | 0.330964    | 0.87523264 |             |
| CANMG0 | NM_172171_16102_R | ACCTAAAAGGCTCGATGTGTGATCTTCTTCTTGAAGAAGTGGACATCCAGCGGCG | HL523465 | 7633  | -0.2075    | 0.07690334  | 1.15691256  | 0.253775    | 0.46105188 | 0.32070119  |
| CANMG0 | NM_172171_16102_R | ACCTAAAAGGCTCGATGTGTGATCTTCTTCTTGAAGAAGTGGACATCCAGCGGCG | HL523465 | 12043 | 0.1005     | 0.1208112   | 0.01016     | 0.04025     | 0.5038851  | 0.07727846  |
| CANMG0 | NM_172171_16102_R | ACCTAAAAGGCTCGATGTGTGATCTTCTTCTTGAAGAAGTGGACATCCAGCGGCG | HL523465 | 17269 | 0.07       | 0.44785     | 0.2611323   | 0.0479946   | -0.148125  | 0.1442042   |
| CANMG0 | NM_172171_16102_R | ACCTAAAAGGCTCGATGTGTGATCTTCTTCTTGAAGAAGTGGACATCCAGCGGCG | HL523465 | 5463  | -0.38975   | 0.2489667   | 0.06195424  | -0.180725   | 0.0698088  | 0.2386648   |
| CANMG0 | NM_172171_16102_R | ACCTAAAAGGCTCGATGTGTGATCTTCTTCTTGAAGAAGTGGACATCCAGCGGCG | HL523465 | 10829 | 0.088      | 0.3289312   | 0.18269403  | -0.1296875  | 0.1262310  | 0.39869965  |
| CANMG0 | NM_172171_16102_R | ACCTAAAAGGCTCGATGTGTGATCTTCTTCTTGAAGAAGTGGACATCCAGCGGCG | HL523465 | 188   | -0.766265  | 0.36888971  | 0.01049079  | -0.217125   | 0.3048411  | 0.2851028   |
| CANMG0 | NM_172171_16102_R | ACCTAAAAGGCTCGATGTGTGATCTTCTTCTTGAAGAAGTGGACATCCAGCGGCG | HL523465 | 5464  | 0.630875   | 0.46428     | 0.01016     | 0.04025     | 0.5038851  | 0.07727846  |
| CANMG0 | NM_172171_16102_R | ACCTAAAAGGCTCGATGTGTGATCTTCTTCTTGAAGAAGTGGACATCCAGCGGCG | HL523465 | 10840 | -0.48775   | 0.1726461   | 0.02161912  | 0.003962    | 0.2030472  | 0.06949777  |
| CANMG0 | NM_172171_16102_R | ACCTAAAAGGCTCGATGTGTGATCTTCTTCTTGAAGAAGTGGACATCCAGCGGCG | HL523465 | 1639  | 0.809      | 0.14075     | 0.01016     | 0.04025     | 0.5038851  | 0.07727846  |
| CANMG0 | NM_172171_16102_R | ACCTAAAAGGCTCGATGTGTGATCTTCTTCTTGAAGAAGTGGACATCCAGCGGCG | HL523465 | 7015  | -0.53405   | 0.1317752   | 0.5242278   | -0.973125   | 0.3208715  | 0.00203325  |
| CANMG0 | NM_172171_16102_R | ACCTAAAAGGCTCGATGTGTGATCTTCTTCTTGAAGAAGTGGACATCCAGCGGCG | HL523465 | 12391 | -1.1667    | 1.7300265   | 0.182274023 | -0.102075   | 0.2711334  | 0.00563936  |
| CANMG0 | NM_172171_16102_R | ACCTAAAAGGCTCGATGTGTGATCTTCTTCTTGAAGAAGTGGACATCCAGCGGCG | HL523465 | 12739 |            |             |             |             |            |             |
| CANMG1 | NM_172171_16102_R | ACCTAAAAGGCTCGATGTGTGATCTTCTTCTTGAAGAAGTGGACATCCAGCGGCG | HL523465 | 7863  |            |             |             |             |            |             |
| CANMG1 | NM_172171_16102_R | ACCTAAAAGGCTCGATGTGTGATCTTCTTCTTGAAGAAGTGGACATCCAGCGGCG | HL523465 | 1987  |            |             |             |             |            |             |
| CANMG1 | NM_172171_16102_R | ACCTAAAAGGCTCGATGTGTGATCTTCTTCTTGAAGAAGTGGACATCCAGCGGCG | HL523465 | 1989  | -0.154275  | 0.48485251  | 0.527910257 | -0.50195    | 0.2326791  | 0.00299189  |
| CANMG1 | NM_172171_16102_R | ACCTAAAAGGCTCGATGTGTGATCTTCTTCTTGAAGAAGTGGACATCCAGCGGCG | HL523465 | 7385  | -0.2367    | 0.3313795   | 0.21700594  | -0.4262     | 0.1945485  | 0.0413912   |
| CANMG1 | NM_172171_16102_R | ACCTAAAAGGCTCGATGTGTGATCTTCTTCTTGAAGAAGTGGACATCCAGCGGCG | HL523465 | 12741 | -0.19525   | 0.53480     | 0.56698198  | -0.29625    | 0.14816505 | 0.0084701   |
| CANMG1 | NM_172171_16102_R | ACCTAAAAGGCTCGATGTGTGATCTTCTTCTTGAAGAAGTGGACATCCAGCGGCG | HL523465 | 747   | 2.49955    | 0.8534796   | 0.00000016  | 1.073275    | 0.4074962  | 0.0082048   |
| CANMG1 | NM_172171_16102_R | ACCTAAAAGGCTCGATGTGTGATCTTCTTCTTGAAGAAGTGGACATCCAGCGGCG | HL523465 | 6123  | 2.69365    | 0.67974967  | 0.000077801 | 2.05433333  | 0.35384428 | 0.00160003  |
| CANMG1 | NM_172171_16102_R | ACCTAAAAGGCTCGATGTGTGATCTTCTTCTTGAAGAAGTGGACATCCAGCGGCG | HL523465 | 11499 | 2.99032    | 0.233102629 | 2.21605     | 2.06033333  | 0.471382   | 0.00015599  |
| CANMG1 | NM_172171_16102_R | ACCTAAAAGGCTCGATGTGTGATCTTCTTCTTGAAGAAGTGGACATCCAGCGGCG | HL523465 | 1861  | 1.42405    | 0.4708256   | 0.13927328  | 0.67975     | 0.4598065  | 0.0038187   |
| CANMG1 | NM_172171_16102_R | ACCTAAAAGGCTCGATGTGTGATCTTCTTCTTGAAGAAGTGGACATCCAGCGGCG | HL523465 | 6123  | 2.69365    | 0.67974967  | 0.000077801 | 2.05433333  | 0.35384428 | 0.00160003  |
| CANMG1 | NM_172171_16102_R | ACCTAAAAGGCTCGATGTGTGATCTTCTTCTTGAAGAAGTGGACATCCAGCGGCG | HL523465 | 11499 | 2.99032    | 0.233102629 | 2.21605     | 2.06033333  | 0.471382   | 0.00015599  |
| CANMG1 | NM_172171_16102_R | ACCTAAAAGGCTCGATGTGTGATCTTCTTCTTGAAGAAGTGGACATCCAGCGGCG | HL523465 | 1861  | 1.42405    | 0.4708256   | 0.13927328  | 0.67975     | 0.4598065  | 0.0038187   |
| CANMG1 | NM_172171_16102_R | ACCTAAAAGGCTCGATGTGTGATCTTCTTCTTGAAGAAGTGGACATCCAGCGGCG | HL523465 | 7237  | 2.99032    | 0.4708256   | 0.13927328  | 0.67975     | 0.4598065  | 0.0038187   |
| CANMG1 | NM_172171_16102_R | ACCTAAAAGGCTCGATGTGTGATCTTCTTCTTGAAGAAGTGGACATCCAGCGGCG | HL523465 | 12613 | 1.4623     | 0.61112131  | 0.23345165  | 0.43263333  | 1.0704427  | 0.46250564  |
| CANMG1 | NM_172171_16102_R | ACCTAAAAGGCTCGATGTGTGATCTTCTTCTTGAAGAAGTGGACATCCAGCGGCG | HL523465 | 535   | -0.79925   | 0.71594668  | 0.04703378  | -5.6374     | 0.52948156 | 0.00128532  |
| CANMG1 | NM_172171_16102_R | ACCTAAAAGGCTCGATGTGTGATCTTCTTCTTGAAGAAGTGGACATCCAGCGGCG | HL523465 | 5911  | -0.85475   | 0.46815525  | 0.0615525   | -0.47023    | 2.7120262  | 0.03262626  |
| CANMG1 | NM_172171_16102_R | ACCTAAAAGGCTCGATGTGTGATCTTCTTCTTGAAGAAGTGGACATCCAGCGGCG | HL523465 | 11287 | -0.90428   | 0.8984948   | 0.55844885  | -3.00833333 | 4.24021161 | 0.11354013  |
| CANMG1 | NM_172171_16102_R | ACCTAAAAGGCTCGATGTGTGATCTTCTTCTTGAAGAAGTGGACATCCAGCGGCG | HL523465 | 3983  | 5.48085    |             |             |             |            |             |
| CANMG1 | NM_172171_16102_R | ACCTAAAAGGCTCGATGTGTGATCTTCTTCTTGAAGAAGTGGACATCCAGCGGCG | HL523465 | 7239  | 7.2705     |             |             |             |            |             |
| CANMG1 | NM_172171_16102_R | ACCTAAAAGGCTCGATGTGTGATCTTCTTCTTGAAGAAGTGGACATCCAGCGGCG | HL523465 | 12615 | 7.2705     |             |             |             |            |             |
| CANMG1 | NM_172171_16102_R | ACCTAAAAGGCTCGATGTGTGATCTTCTTCTTGAAGAAGTGGACATCCAGCGGCG | HL523465 | 2868  | 7.112      | 0.2489916   | 0.021795816 | 0.2371      | 0.4889705  | 0.3708477   |
| CANMG1 | NM_172171_16102_R | ACCTAAAAGGCTCGATGTGTGATCTTCTTCTTGAAGAAGTGGACATCCAGCGGCG | HL523465 | 8244  | 0.3978     | 0.5907308   | 0.18931329  | 0.062035    | 0.7074891  | 0.84280204  |
| CANMG1 | NM_172171_16102_R | ACCTAAAAGGCTCGATGTGTGATCTTCTTCTTGAAGAAGTGGACATCCAGCGGCG | HL523465 | 13620 | 0.4078     | 0.1167933   | 0.130739496 | 0.134825    | 0.7501965  | 0.34084051  |
| CANMG1 | NM_172171_16102_R | ACCTAAAAGGCTCGATGTGTGATCTTCTTCTTGAAGAAGTGGACATCCAGCGGCG | HL523465 | 2872  | -0.188265  | 0.1347818   | 0.34800424  | 0.176275    | 0.43381756 | 0.02845191  |
| CANMG1 | NM_172171_16102_R | ACCTAAAAGGCTCGATGTGTGATCTTCTTCTTGAAGAAGTGGACATCCAGCGGCG | HL523465 | 8248  | 0.3978     | 0.5907308   | 0.18931329  | 0.062035    | 0.7074891  | 0.84280204  |
| CANMG1 | NM_172171_16102_R | ACCTAAAAGGCTCGATGTGTGATCTTCTTCTTGAAGAAGTGGACATCCAGCGGCG | HL523465 | 13624 | -0.1179    | 0.3131772   | 0.53313861  | -0.1625     | 0.5082813  | 0.0466057   |
| CANMG1 | NM_172171_16102_R | ACCTAAAAGGCTCGATGTGTGATCTTCTTCTTGAAGAAGTGGACATCCAGCGGCG | HL523465 | 4188  | 1.822675   | 0.4753884   | 0.00055612  | -0.0424     | 0.4720504  | 0.04642376  |
| CANMG1 | NM_172171_16102_R | ACCTAAAAGGCTCGATGTGTGATCTTCTTCTTGAAGAAGTGGACATCCAGCGGCG | HL523465 | 9564  | 1.91748    | 0.444884    | 0.24882     | 0.1450183   | 0.2013212  | 0.3122      |
| CANMG1 | NM_172171_16102_R | ACCTAAAAGGCTCGATGTGTGATCTTCTTCTTGAAGAAGTGGACATCCAGCGGCG | HL523465 | 14940 | 1.974675   | 0.5090911   | 0.000390225 | 0.10775     | 0.3679721  | 0.04386678  |
| CANMG1 | NM_172171_16102_R | ACCTAAAAGGCTCGATGTGTGATCTTCTTCTTGAAGAAGTGGACATCCAGCGGCG | HL523465 | 4186  | 0.4680325  | 0.3705531   | 0.058463495 | 0.06428     | 0.3436925  | 0.7743587   |
| CANMG1 | NM_172171_16102_R | ACCTAAAAGGCTCGATGTGTGATCTTCTTCTTGAAGAAGTGGACATCCAGCGGCG | HL523465 | 9562  | -0.436125  | 0.3386972   | 0.06358818  | 0.046428    | 0.3436925  | 0.7743587   |
| CANMG1 | NM_172171_16102_R | ACCTAAAAGGCTCGATGTGTGATCTTCTTCTTGAAGAAGTGGACATCCAGCGGCG | HL523465 | 14938 | 0.343075   | 0.549174    | 0.00000000  | 0.1462125   | 0.4524302  | 0.00254698  |
| CANMG1 | NM_172171_16102_R | ACCTAAAAGGCTCGATGTGTGATCTTCTTCTTGAAGAAGTGGACATCCAGCGGCG | HL523465 | 4190  | 0.0801425  | 0.2765376   | 0.002029464 | 0.30905     | 0.32315728 | 0.13244664  |
| CANMG1 | NM_172171_16102_R | ACCTAAAAGGCTCGATGTGTGATCTTCTTCTTGAAGAAGTGGACATCCAGCGGCG | HL523465 | 9564  | 0.021125   | 0.3691165   | 0.00304588  | 0.32425     | 0.25261    | 0.1938188   |
| CANMG1 | NM_172171_16102_R | ACCTAAAAGGCTCGATGTGTGATCTTCTTCTTGAAGAAGTGGACATCCAGCGGCG | HL523465 | 14942 | 0.932125   | 0.2029501   | 0.00254837  | 0.322475    | 0.2651377  | 0.16795587  |
| CANMG1 | NM_172171_16102_R | ACCTAAAAGGCTCGATGTGTGATCTTCTTCTTGAAGAAGTGGACATCCAGCGGCG | HL523465 | 2533  | 0.48825    | 0.1998392   | 0.2820914   | 0.400735    | 0.2609997  | 0.1096858   |
| CANMG1 | NM_172171_16102_R | ACCTAAAAGGCTCGATGTGTGATCTTCTTCTTGAAGAAGTGGACATCCAGCGGCG | HL523465 | 7909  | 0.97875    | 0.3688971   | 0.301500717 | 0.4523238   | 0.3651377  | 0.1020162   |
| CANMG1 | NM_172171_16102_R | ACCTAAAAGGCTCGATGTGTGATCTTCTTCTTGAAGAAGTGGACATCCAGCGGCG | HL523465 | 13285 | 0.659975   | 1.2053065   | 0.204292664 | -0.32065    | 0.3563272  | 0.1729391   |
| CANMG1 | NM_172171_16102_R | ACCTAAAAGGCTCGATGTGTGATCTTCTTCTTGAAGAAGTGGACATCCAGCGGCG | HL523465 | 2535  | 1.1445     | 0.1938466   | 0.02173966  | 0.1462125   | 0.4524302  | 0.00254698  |
| CANMG1 | NM_172171_16102_R | ACCTAAAAGGCTCGATGTGTGATCTTCTTCTTGAAGAAGTGGACATCCAGCGGCG | HL523465 | 7911  | -0.252175  | 0.9274531   | 0.63158113  | 0.7697875   | 1.0871263  | 0.10328466  |
| CANMG1 | NM_172171_16102_R | ACCTAAAAGGCTCGATGTGTGATCTTCTTCTTGAAGAAGTGGACATCCAGCGGCG | HL523465 | 13285 | 0.659975   | 1.2053065   | 0.204292664 | -0.32065    | 0.3563272  | 0.1729391   |
| CANMG1 | NM_172171_16102_R | ACCTAAAAGGCTCGATGTGTGATCTTCTTCTTGAAGAAGTGGACATCCAGCGGCG | HL523465 | 2535  | 1.1445     | 0.1938466   | 0.02173966  | 0.1462125   | 0.4524302  | 0.00254698  |
| CANMG1 | NM_172171_16102_R | ACCTAAAAGGCTCGATGTGTGATCTTCTTCTTGAAGAAGTGGACATCCAGCGGCG | HL523465 | 7912  | 0.31       | 0.978275    | 0.2916193   | 0.00213085  | 0.264625   | 0.51287703  |
| CANMG1 | NM_172171_16102_R | ACCTAAAAGGCTCGATGTGTGATCTTCTTCTTGAAGAAGTGGACATCCAGCGGCG | HL523465 | 13285 | 0.659975   | 1.2053065   | 0.204292664 | -0.32065    | 0.3563272  | 0.1729391   |
| CANMG1 | NM_172171_16102_R | ACCTAAAAGGCTCGATGTGTGATCTTCTTCTTGAAGAAGTGGACATCCAGCGGCG | HL523465 | 2535  | 1.1445     | 0.1938466   | 0.02173966  | 0.1462125   | 0.4524302  | 0.00254698  |
| CANMG1 | NM_172171_16102_R | ACCTAAAAGGCTCGATGTGTGATCTTCTTCTTGAAGAAGTGGACATCCAGCGGCG | HL523465 | 7913  | 1.1283     | 0.9425      | 0.3007469   | 0.7660113   | 0.47441603 |             |
| CANMG1 | NM_172171_16102_R | ACCTAAAAGGCTCGATGTGTGATCTTCTTCTTGAAGAAGTGGACATCCAGCGGCG | HL523465 | 9035  | 0.262      | 0.959625    | 0.01208578  | 3.505573    | 3.9599665  | 0.03278451  |
| CANMG1 | NM_172171_16102_R | ACCTAAAAGGCTCGATGTGTGATCTTCTTCTTGAAGAAGTGGACATCCAGCGGCG | HL523465 | 9036  | 0.262      | 0.959625    | 0.01208578  | 3.505573    | 3.9599665  | 0.03278451  |
| CANMG1 | NM_172171_16102_R | ACCTAAAAGGCTCGATGTGTGATCTTCTTCTTGAAGAAGTGGACATCCAGCGGCG | HL523465 | 11654 | 0.4110875  | 0.2701938   | 0.00428408  | 1.347       | 0.5669179  | 0.09467113  |
| CANMG1 | NM_172171_16102_R | ACCTAAAAGGCTCGATGTGTGATCTTCTTCTTGAAGAAGTGGACATCCAGCGGCG | HL523465 | 9037  | 0.3313262  | 0.634284    | 0.00000000  | 0.3306285   | 0.8463997  | 0.34819748  |
| CANMG1 | NM_172171_16102_R | ACCTAAAAGGCTCGATGTGTGATCTTCTTCTTGAAGAAGTGGACATCCAGCGGCG | HL523465 | 11655 | 0.259      | 0.6784875   | 0.01768067  | 0.3006125   | 0.9182378  | 0.416421375 |
| CANMG1 | NM_172171_16102_R | ACCTAAAAGGCTCGATGTGTGATCTTCTTCTTGAAGAAGTGGACATCCAGCGGCG | HL523465 | 11656 | 0.259      | 0.6784875   | 0.01768067  | 0.3006125   | 0.9182378  | 0.416421375 |
| CANMG1 | NM_172171_16102_R | ACCTAAAAGGCTCGATGTGTGATCTTCTTCTTGAAGAAGTGGACATCCAGCGGCG | HL523465 | 7642  | 0.5608     | 0.5784047   | 0.25713251  | 0.3691875   | 0.974987   | 0.37361051  |
| CANMG1 | NM_172171_16102_R | ACCTAAAAGGCTCGATGTGTGATCTTCTTCTTGAAGAAGTGGACATCCAGCGGCG | HL523465 | 13018 | 1.2626     |             |             | 0.6211      | 0.30407102 | 0.14282353  |
| CANMG1 | NM_172171_16102_R | ACCTAAAAGGCTCGATGTGTGATCTTCTTCTTGAAGAAGTGGACATCCAGCGGCG | HL523465 | 13019 | 1.2626     |             |             |             |            | -0.8719     |
| CANMG1 | NM_172171_16102_R | ACCTAAAAGGCTCGATGTGTGATCTTCTTCTTGAAGAAGTGGACATCCAGCGGCG | HL523465 | 2266  | 0.186      |             |             |             |            |             |
| CANMG1 | NM_172171_16102_R | ACCTAAAAGGCTCGATGTGTGATCTTCTTCTTGAAGAAGTGGACATCCAGCGGCG | HL523465 | 1410  | -0.37345   | 0.4533088   | 0.20507971  | -0.7980875  | 0.5181292  | 0.02589239  |
| CANMG1 | NM_172171_16102_R | ACCTAAAAGGCTCGATGTGTGATCTTCTTCTTGAAGAAGTGGACATCCAGCGGCG | HL523465 | 6786  | 0.114165   | 0.4162308   | 0.01000000  | -0.702125   | 0.6056728  | 0.05634149  |
| CANMG1 | NM_172171_16102_R | ACCTAAAAGGCTCGATGTGTGATCTTCTTCTTGAAGAAGTGGACATCCAGCGGCG | HL523465 | 12162 | -0.44855   | 0.44093269  | 0.124496847 | -0.00000000 | 0.00000000 | 0.00000000  |
| CANMG1 | NM_172171_16102_R | ACCTAAAAGGCTCGATGTGTGATCTTCTTCTTGAAGAAGTGGACATCCAGCGGCG | HL523465 | 1409  | 0.00000000 | 0.00000000  | 0.00000000  | 0.00000000  | 0.00000000 | 0.00000000  |
| CANMG1 | NM_172171_16102_R | ACCTAAAAGGCTCGATGTGTGATCTTCTTCTTGAAGAAGTGGACATCCAGCGGCG | HL523465 | 6785  | 0.1215     | 0.258       |             |             |            |             |



|      |                    |                                                                |          |       |             |            |             |            |            |             |             |            |             |
|------|--------------------|----------------------------------------------------------------|----------|-------|-------------|------------|-------------|------------|------------|-------------|-------------|------------|-------------|
| CC81 | CR09171_161351_R   | ACCTAAAAGGCTTGGATCCAGCAGCAATCTTCTGTAATATCTTCTTGATGACCCAGCCCGG  | HL301291 | 10049 | 0.90595     | 0.52344754 | 0.01203427  | 0.5452     | 1.01628204 | 0.270884016 | -0.58486667 | 1.07780978 | 0.259953883 |
| CC81 | CR09171_161351_R   | ACCTAAAAGGCTTGGATCCAGCAGCAATCTTCTGTAATATCTTCTTGATGACCCAGCCCGG  | HL301291 | 15425 | 0.90595     | 0.52344754 | 0.01203427  | 0.5452     | 1.01628204 | 0.270884016 | -0.58486667 | 1.07780978 | 0.259953883 |
| CC81 | CR09171_161351_R   | ACCTAAAAGGCTTGGATCCAGCAGCAATCTTCTGTAATATCTTCTTGATGACCCAGCCCGG  | HL301291 | 4671  | 0.4549      | 0.81172851 | 0.23716610  | 0.30399    | 0.18084362 | 0.103404162 | 0.297433333 | 1.5310116  | 0.637324049 |
| CC81 | CR09171_161351_R   | ACCTAAAAGGCTTGGATCCAGCAGCAATCTTCTGTAATATCTTCTTGATGACCCAGCCCGG  | HL301291 | 10047 | 0.51375     | 0.134715   | 0.00719718  | 0.00000000 | 0.44533796 | 0.00739860  | 0.00000000  | 0.00000000 | 0.00000000  |
| CC81 | CR09171_161351_R   | ACCTAAAAGGCTTGGATCCAGCAGCAATCTTCTGTAATATCTTCTTGATGACCCAGCCCGG  | HL301291 | 15423 | 0.33333     | 0.0547010  | 0.47694800  | 0.46223    | 0.13945365 | 0.06555555  | 0.167533333 | 1.1960241  | 0.745161676 |
| CC81 | CR09171_162051_R   | ACCTAAAAGGCTGATTTATATATATATATCTTCTGTAATATCTTCTTGATGACCCAGCCCGG | HL301291 | 4669  | -0.18975    | 0.38274784 | 0.38126564  | -0.63585   | 0.53273724 | 0.079790477 | -0.565      | -0.8172223 | 1.18945116  |
| CC81 | CR09171_162051_R   | ACCTAAAAGGCTGATTTATATATATATCTTCTGTAATATCTTCTTGATGACCCAGCCCGG   | HL301291 | 10045 | 0.052575    | 0.38179728 | 0.18470546  | 0.34075    | 0.44825146 | 0.181395014 | -0.4333     | 1.0017446  | 0.33723288  |
| CC81 | CR09171_162051_R   | ACCTAAAAGGCTGATTTATATATATATCTTCTGTAATATCTTCTTGATGACCCAGCCCGG   | HL301291 | 15421 | -0.22125    | 0.44704548 | 0.34892608  | -0.0815    | 0.27821286 | 0.653767177 | -0.3610333  | 1.01428294 | 0.64075506  |
| CC81 | CR09171_162051_R   | ACCTAAAAGGCTGATTTATATATATATCTTCTGTAATATCTTCTTGATGACCCAGCCCGG   | HL301291 | 2567  | 0.5711000   | 0.400257   | 0.00000000  | 0.00000000 | 0.00000000 | 0.00000000  | 0.00000000  | 0.00000000 | 0.00000000  |
| CC87 | NK_001838_160739_R | ACCTAAAAGGCTGGTGTGTGATGATATCTTCTGTAATATCTTCTTGATGACCCAGCCCGG   | HL370036 | 7943  | 0.142483333 | 0.51110471 | 0.03194595  | 0.00000000 | 0.00000000 | 0.00000000  | 0.00000000  | 0.00000000 | 0.00000000  |
| CC87 | NK_001838_160739_R | ACCTAAAAGGCTGGTGTGTGATGATATCTTCTGTAATATCTTCTTGATGACCCAGCCCGG   | HL370036 | 1218  | 0.142483333 | 0.51110471 | 0.03194595  | 0.00000000 | 0.00000000 | 0.00000000  | 0.00000000  | 0.00000000 | 0.00000000  |
| CC87 | NK_001838_160739_R | ACCTAAAAGGCTGGTGTGTGATGATATCTTCTGTAATATCTTCTTGATGACCCAGCCCGG   | HL370036 | 1262  | -0.1361375  | 0.3084487  | 0.00099436  | 0.00000000 | 0.00000000 | 0.00000000  | 0.00000000  | 0.00000000 | 0.00000000  |
| CC87 | NK_001838_160739_R | ACCTAAAAGGCTGGTGTGTGATGATATCTTCTGTAATATCTTCTTGATGACCCAGCCCGG   | HL370036 | 6638  | -1.4007735  | 0.2802369  | 0.00039349  | 0.00000000 | 0.00000000 | 0.00000000  | 0.00000000  | 0.00000000 | 0.00000000  |
| CC87 | NK_001838_160739_R | ACCTAAAAGGCTGGTGTGTGATGATATCTTCTGTAATATCTTCTTGATGACCCAGCCCGG   | HL370036 | 12014 | -1.4644826  | 0.3328951  | 0.00094439  | 0.00000000 | 0.00000000 | 0.00000000  | 0.00000000  | 0.00000000 | 0.00000000  |
| CC87 | NK_001838_160739_R | ACCTAAAAGGCTGGTGTGTGATGATATCTTCTGTAATATCTTCTTGATGACCCAGCCCGG   | HL370036 | 2593  | -1.20303333 | 0.35176693 | 0.00420845  | 0.00000000 | 0.00000000 | 0.00000000  | 0.00000000  | 0.00000000 | 0.00000000  |
| CC87 | NK_001838_160739_R | ACCTAAAAGGCTGGTGTGTGATGATATCTTCTGTAATATCTTCTTGATGACCCAGCCCGG   | HL370036 | 7969  | -1.22065    | 0.31531558 | 0.00320167  | 0.00000000 | 0.00000000 | 0.00000000  | 0.00000000  | 0.00000000 | 0.00000000  |
| CC87 | NK_001838_160739_R | ACCTAAAAGGCTGGTGTGTGATGATATCTTCTGTAATATCTTCTTGATGACCCAGCCCGG   | HL370036 | 13345 | -1.25383333 | 0.33660312 | 0.00341442  | -0.26025   | 0.11984846 | 0.09561871  | -0.04623    | 0.55978862 | 0.05139001  |
| CC87 | NK_001838_160739_R | ACCTAAAAGGCTGGTGTGTGATGATATCTTCTGTAATATCTTCTTGATGACCCAGCCCGG   | HL370036 | 770   | -0.92475    | 0.2238827  | 0.001887187 | 0.00000000 | 0.00000000 | 0.00000000  | 0.00000000  | 0.00000000 | 0.00000000  |
| CC87 | NK_001838_160739_R | ACCTAAAAGGCTGGTGTGTGATGATATCTTCTGTAATATCTTCTTGATGACCCAGCCCGG   | HL370036 | 15322 | -0.8243375  | 0.3330242  | 0.00187829  | -0.17823   | 0.11020213 | 0.25886983  | -0.0537835  | 0.4907554  | 0.960260603 |
| CC87 | NK_001838_160739_R | ACCTAAAAGGCTGGTGTGTGATGATATCTTCTGTAATATCTTCTTGATGACCCAGCCCGG   | HL370036 | 771   | 0.20205     | 0.7385761  | 0.047174928 | 0.61343333 | 0.9756954  | 0.26095513  | 0.167533333 | 1.1960241  | 0.745161676 |
| CC87 | NK_001838_160739_R | ACCTAAAAGGCTGGTGTGTGATGATATCTTCTGTAATATCTTCTTGATGACCCAGCCCGG   | HL370036 | 6147  | 0.99675     | 0.79301595 | 0.03012848  | 0.89475    | 0.9309822  | 0.08216157  | 0.00000000  | 0.00000000 | 0.00000000  |
| CC87 | NK_001838_160739_R | ACCTAAAAGGCTGGTGTGTGATGATATCTTCTGTAATATCTTCTTGATGACCCAGCCCGG   | HL370036 | 11523 | 1.179375    | 0.9496272  | 0.0387207   | 0.77025    | 0.7028972  | 0.00000000  | 0.00000000  | 0.00000000 | 0.00000000  |
| CC87 | NK_001838_160739_R | ACCTAAAAGGCTGGTGTGTGATGATATCTTCTGTAATATCTTCTTGATGACCCAGCCCGG   | HL370036 | 2591  | -0.46455    | 0.17818338 | 0.041266584 | 0.00000000 | 0.00000000 | 0.00000000  | 0.00000000  | 0.00000000 | 0.00000000  |
| CC87 | NK_001838_160739_R | ACCTAAAAGGCTGGTGTGTGATGATATCTTCTGTAATATCTTCTTGATGACCCAGCCCGG   | HL370036 | 7957  | -0.389875   | 0.21107913 | 0.00698311  | 0.00000000 | 0.00000000 | 0.00000000  | 0.00000000  | 0.00000000 | 0.00000000  |
| CC87 | NK_001838_160739_R | ACCTAAAAGGCTGGTGTGTGATGATATCTTCTGTAATATCTTCTTGATGACCCAGCCCGG   | HL370036 | 13343 | -0.442725   | 0.1928286  | 0.05496312  | 0.00000000 | 0.00000000 | 0.00000000  | 0.00000000  | 0.00000000 | 0.00000000  |
| CC87 | NK_001838_160739_R | ACCTAAAAGGCTGGTGTGTGATGATATCTTCTGTAATATCTTCTTGATGACCCAGCCCGG   | HL370036 | 2589  | -0.289725   | 0.14666263 | 0.00620359  | 0.00000000 | 0.00000000 | 0.00000000  | 0.00000000  | 0.00000000 | 0.00000000  |
| CC87 | NK_001838_160739_R | ACCTAAAAGGCTGGTGTGTGATGATATCTTCTGTAATATCTTCTTGATGACCCAGCCCGG   | HL370036 | 7965  | -0.708125   | 0.11133883 | 0.05252963  | 0.00000000 | 0.00000000 | 0.00000000  | 0.00000000  | 0.00000000 | 0.00000000  |
| CC87 | NK_001838_160739_R | ACCTAAAAGGCTGGTGTGTGATGATATCTTCTGTAATATCTTCTTGATGACCCAGCCCGG   | HL370036 | 13341 | 0.74425     | 0.11448885 | 0.00526512  | 0.00000000 | 0.00000000 | 0.00000000  | 0.00000000  | 0.00000000 | 0.00000000  |
| CC87 | NK_001838_160739_R | ACCTAAAAGGCTGGTGTGTGATGATATCTTCTGTAATATCTTCTTGATGACCCAGCCCGG   | HL370036 | 2617  | -1.041175   | 0.1647665  | 0.00099117  | 0.00000000 | 0.00000000 | 0.00000000  | 0.00000000  | 0.00000000 | 0.00000000  |
| CC87 | NK_001838_160739_R | ACCTAAAAGGCTGGTGTGTGATGATATCTTCTGTAATATCTTCTTGATGACCCAGCCCGG   | HL370036 | 7993  | -1.038625   | 0.101285   | 0.00098139  | 0.00000000 | 0.00000000 | 0.00000000  | 0.00000000  | 0.00000000 | 0.00000000  |
| CC87 | NK_001838_160739_R | ACCTAAAAGGCTGGTGTGTGATGATATCTTCTGTAATATCTTCTTGATGACCCAGCCCGG   | HL370036 | 13349 | 0.3448      | 0.09224451 | 0.00133009  | 0.00000000 | 0.00000000 | 0.00000000  | 0.00000000  | 0.00000000 | 0.00000000  |
| CC87 | NK_001838_160739_R | ACCTAAAAGGCTGGTGTGTGATGATATCTTCTGTAATATCTTCTTGATGACCCAGCCCGG   | HL370036 | 2544  | -0.27195    | 0.79917982 | 0.52273825  | 0.00000000 | 0.00000000 | 0.00000000  | 0.00000000  | 0.00000000 | 0.00000000  |
| CC87 | NK_001838_160739_R | ACCTAAAAGGCTGGTGTGTGATGATATCTTCTGTAATATCTTCTTGATGACCCAGCCCGG   | HL370036 | 7950  | 0.3216      | 0.3981573  | 0.52461615  | 0.00000000 | 0.00000000 | 0.00000000  | 0.00000000  | 0.00000000 | 0.00000000  |
| CC87 | NK_001838_160739_R | ACCTAAAAGGCTGGTGTGTGATGATATCTTCTGTAATATCTTCTTGATGACCCAGCCCGG   | HL370036 | 13296 | -0.305475   | 0.80642059 | 0.497668995 | 0.00000000 | 0.00000000 | 0.00000000  | 0.00000000  | 0.00000000 | 0.00000000  |
| CC87 | NK_001838_160739_R | ACCTAAAAGGCTGGTGTGTGATGATATCTTCTGTAATATCTTCTTGATGACCCAGCCCGG   | HL370036 | 2530  | 0.38185     | 0.184888   | 0.00000000  | 0.00000000 | 0.00000000 | 0.00000000  | 0.00000000  | 0.00000000 | 0.00000000  |
| CC87 | NK_001838_160739_R | ACCTAAAAGGCTGGTGTGTGATGATATCTTCTGTAATATCTTCTTGATGACCCAGCCCGG   | HL370036 | 7946  | 0.342675    | 0.5494804  | 0.72289916  | 0.00000000 | 0.00000000 | 0.00000000  | 0.00000000  | 0.00000000 | 0.00000000  |
| CC87 | NK_001838_160739_R | ACCTAAAAGGCTGGTGTGTGATGATATCTTCTGTAATATCTTCTTGATGACCCAGCCCGG   | HL370036 | 13322 | -0.306625   | 0.7964726  | 0.13000404  | -0.3640125 | 0.6882603  | 0.1374645   | -0.0000000  | 0.00000000 | 0.00000000  |
| CC87 | NK_001838_160739_R | ACCTAAAAGGCTGGTGTGTGATGATATCTTCTGTAATATCTTCTTGATGACCCAGCCCGG   | HL370036 | 2542  | 0.457725    | 0.5411906  | 0.00648136  | 0.648664   | 0.811984   | 0.00000000  | 0.00000000  | 0.00000000 | 0.00000000  |
| CC87 | NK_001838_160739_R | ACCTAAAAGGCTGGTGTGTGATGATATCTTCTGTAATATCTTCTTGATGACCCAGCCCGG   | HL370036 | 7918  | 0.448825    | 0.6310157  | 0.121460252 | -0.6397875 | 0.8821639  | 0.1447843   | -0.0000000  | 0.00000000 | 0.00000000  |
| CC87 | NK_001838_160739_R | ACCTAAAAGGCTGGTGTGTGATGATATCTTCTGTAATATCTTCTTGATGACCCAGCCCGG   | HL370036 | 13244 | 0.446684    | 0.325      | 0.5491328   | 0.460626   | 0.7814466  | 0.00000000  | 0.00000000  | 0.00000000 | 0.00000000  |
| CC87 | NK_001838_160739_R | ACCTAAAAGGCTGGTGTGTGATGATATCTTCTGTAATATCTTCTTGATGACCCAGCCCGG   | HL370036 | 2540  | 0.1564125   | 0.6332851  | 0.00241601  | 0.1627375  | 0.6251491  | 0.5899774   | 0.0000000   | 0.00000000 | 0.00000000  |
| CC87 | NK_001838_160739_R | ACCTAAAAGGCTGGTGTGTGATGATATCTTCTGTAATATCTTCTTGATGACCCAGCCCGG   | HL370036 | 7947  | 0.38185     | 0.184888   | 0.00000000  | 0.00000000 | 0.00000000 | 0.00000000  | 0.00000000  | 0.00000000 | 0.00000000  |
| CC87 | NK_001838_160739_R | ACCTAAAAGGCTGGTGTGTGATGATATCTTCTGTAATATCTTCTTGATGACCCAGCCCGG   | HL370036 | 13283 | 1.401375    | 0.3434287  | 0.00062323  | 0.00000000 | 0.00000000 | 0.00000000  | 0.00000000  | 0.00000000 | 0.00000000  |
| CC87 | NK_001838_160739_R | ACCTAAAAGGCTGGTGTGTGATGATATCTTCTGTAATATCTTCTTGATGACCCAGCCCGG   | HL370036 | 2540  | 0.132475    | 0.1887746  | 0.00000000  | 0.00000000 | 0.00000000 | 0.00000000  | 0.00000000  | 0.00000000 | 0.00000000  |
| CC87 | NK_001838_160739_R | ACCTAAAAGGCTGGTGTGTGATGATATCTTCTGTAATATCTTCTTGATGACCCAGCCCGG   | HL370036 | 6434  | -1.4027625  | 0.2096687  | 0.00052159  | 0.00000000 | 0.00000000 | 0.00000000  | 0.00000000  | 0.00000000 | 0.00000000  |
| CC87 | NK_001838_160739_R | ACCTAAAAGGCTGGTGTGTGATGATATCTTCTGTAATATCTTCTTGATGACCCAGCCCGG   | HL370036 | 11810 | -1.4462625  | 0.2938878  | 0.00038953  | -0.012875  | 0.3627952  | 0.9529204   | -0.0000000  | 0.00000000 | 0.00000000  |
| CC87 | NK_001838_160739_R | ACCTAAAAGGCTGGTGTGTGATGATATCTTCTGTAATATCTTCTTGATGACCCAGCCCGG   | HL370036 | 1057  | 0.006875    | 0.1704823  | 0.00000000  | 0.00000000 | 0.00000000 | 0.00000000  | 0.00000000  | 0.00000000 | 0.00000000  |
| CC87 | NK_001838_160739_R | ACCTAAAAGGCTGGTGTGTGATGATATCTTCTGTAATATCTTCTTGATGACCCAGCCCGG   | HL370036 | 6433  | 0.8831875   | 0.1404288  | 0.002178803 | 0.00000000 | 0.00000000 | 0.00000000  | 0.00000000  | 0.00000000 | 0.00000000  |
| CC87 | NK_001838_160739_R | ACCTAAAAGGCTGGTGTGTGATGATATCTTCTGTAATATCTTCTTGATGACCCAGCCCGG   | HL370036 | 11809 | 0.979675    | 0.126888   | 0.00000000  | 0.00000000 | 0.00000000 | 0.00000000  | 0.00000000  | 0.00000000 | 0.00000000  |
| CC87 | NK_001838_160739_R | ACCTAAAAGGCTGGTGTGTGATGATATCTTCTGTAATATCTTCTTGATGACCCAGCCCGG   | HL370036 | 1042  | -0.869875   | 0.2660143  | 0.003269784 | 0.00000000 | 0.00000000 | 0.00000000  | 0.00000000  | 0.00000000 | 0.00000000  |
| CC87 | NK_001838_160739_R | ACCTAAAAGGCTGGTGTGTGATGATATCTTCTGTAATATCTTCTTGATGACCCAGCCCGG   | HL370036 | 6433  | 0.8831875   | 0.1404288  | 0.002178803 | 0.00000000 | 0.00000000 | 0.00000000  | 0.00000000  | 0.00000000 | 0.00000000  |
| CC87 | NK_001838_160739_R | ACCTAAAAGGCTGGTGTGTGATGATATCTTCTGTAATATCTTCTTGATGACCCAGCCCGG   | HL370036 | 11794 | -0.828875   | 0.3150343  | 0.005466511 | 0.00000000 | 0.00000000 | 0.00000000  | 0.00000000  | 0.00000000 | 0.00000000  |
| CC87 | NK_001838_160739_R | ACCTAAAAGGCTGGTGTGTGATGATATCTTCTGTAATATCTTCTTGATGACCCAGCCCGG   | HL370036 | 6419  | -0.488125   | 0.6441626  | 0.14248164  | 0.00000000 | 0.00000000 | 0.00000000  | 0.00000000  | 0.00000000 | 0.00000000  |
| CC87 | NK_001838_160739_R | ACCTAAAAGGCTGGTGTGTGATGATATCTTCTGTAATATCTTCTTGATGACCCAGCCCGG   | HL370036 | 11795 | 0.647375    | 0.1293948  | 0.15799702  | 0.4807125  | 0.1820887  | 0.0411015   | -0.0000000  | 0.00000000 | 0.00000000  |
| CC87 | NK_001838_160739_R | ACCTAAAAGGCTGGTGTGTGATGATATCTTCTGTAATATCTTCTTGATGACCCAGCCCGG   | HL370036 | 1044  | 0.044404    | 0.3281022  | 0.00000000  | 0.3504875  | 0.6502042  | 0.27288078  | 0.0000000   | 0.00000    |             |



|       |                    |                                                         |          |       |             |             |             |             |             |             |
|-------|--------------------|---------------------------------------------------------|----------|-------|-------------|-------------|-------------|-------------|-------------|-------------|
| CKL3  | NM_016588_b0660_R  | ACCTAAAGAGCCCTCACTCGAGAAATCTTCTTGAATATCTTCAAGTACAGTGGGG | HL105818 | 11321 | -1.1767975  | 0.69229923  | 0.00193002  | -1.54366667 | 5.00389662  | 0.52445878  |
| CKL3  | NM_016588_b0670_R  | ACCTAAAGAGCCCTCACTCGAGAAATCTTCTTGAATATCTTCAAGTACAGTGGGG | HL105818 | 11322 | 0.1756      |             |             |             |             |             |
| CKL3  | NM_016588_b0675_R  | ACCTAAAGAGCCCTCACTCGAGAAATCTTCTTGAATATCTTCAAGTACAGTGGGG | HL105818 | 11323 | 1.3227      |             |             | -0.6519     |             |             |
| CKL3  | NM_016588_b0680_R  | ACCTAAAGAGCCCTCACTCGAGAAATCTTCTTGAATATCTTCAAGTACAGTGGGG | HL105818 | 12566 | 1.4665      |             |             |             |             |             |
| CKL4  | NM_29329_b0614_R   | ACCTAAAGAGCCCTCACTCGAGAAATCTTCTTGAATATCTTCAAGTACAGTGGGG | HL603201 | 872   | -0.3413     | 0.02672864  | 0.02798664  |             |             |             |
| CKL4  | NM_29329_b0618_R   | ACCTAAAGAGCCCTCACTCGAGAAATCTTCTTGAATATCTTCAAGTACAGTGGGG | HL603201 | 6248  | -0.8025     |             |             |             |             |             |
| CKL4  | NM_29329_b0619_R   | ACCTAAAGAGCCCTCACTCGAGAAATCTTCTTGAATATCTTCAAGTACAGTGGGG | HL603201 | 11624 | 7.116       |             |             |             |             |             |
| CKL4  | NM_29329_b0620_R   | ACCTAAAGAGCCCTCACTCGAGAAATCTTCTTGAATATCTTCAAGTACAGTGGGG | HL603201 | 2040  | 0.4057      |             |             | -0.8885     |             |             |
| CKL4  | NM_29329_b0621_R   | ACCTAAAGAGCCCTCACTCGAGAAATCTTCTTGAATATCTTCAAGTACAGTGGGG | HL603201 | 7416  | 0.2623      |             |             | 0.4648      |             |             |
| CKL4  | NM_29329_b0623_R   | ACCTAAAGAGCCCTCACTCGAGAAATCTTCTTGAATATCTTCAAGTACAGTGGGG | HL603201 | 12792 | 0.2941      |             |             | -0.4643     |             |             |
| CKL4  | NM_29329_b0624_R   | ACCTAAAGAGCCCTCACTCGAGAAATCTTCTTGAATATCTTCAAGTACAGTGGGG | HL603201 | 8123  | 0.1113912   | 0.088685991 |             |             |             |             |
| CKL4  | NM_29329_b0625_R   | ACCTAAAGAGCCCTCACTCGAGAAATCTTCTTGAATATCTTCAAGTACAGTGGGG | HL603201 | 6249  | 0.5321      |             |             |             |             |             |
| CKL4  | NM_29329_b0626_R   | ACCTAAAGAGCCCTCACTCGAGAAATCTTCTTGAATATCTTCAAGTACAGTGGGG | HL603201 | 11625 | 0.4031      |             |             |             |             |             |
| CKL5  | NM_003159_b0268_R  | ACCTAAAGAGCCCTCACTCGAGAAATCTTCTTGAATATCTTCAAGTACAGTGGGG | HL435370 | 316   | 0.30795     | 0.30995968  | 0.84647401  | 0.8704375   | 0.1520483   | 0.00251742  |
| CKL5  | NM_003159_b0269_R  | ACCTAAAGAGCCCTCACTCGAGAAATCTTCTTGAATATCTTCAAGTACAGTGGGG | HL435370 | 5602  | 0.607675    | 0.10472255  | 0.87914443  | 0.8918735   | 0.18660333  | 0.00273887  |
| CKL5  | NM_003159_b0270_R  | ACCTAAAGAGCCCTCACTCGAGAAATCTTCTTGAATATCTTCAAGTACAGTGGGG | HL435370 | 11068 | 0.004775    | 0.34006025  | 0.76660974  | 0.8805125   | 0.19664644  | 0.00000582  |
| CKL5  | NM_003159_b0271_R  | ACCTAAAGAGCCCTCACTCGAGAAATCTTCTTGAATATCTTCAAGTACAGTGGGG | HL435370 | 1544  |             |             |             | 1.5476375   | 1.7812384   | 0.09653006  |
| CKL5  | NM_003159_b0272_R  | ACCTAAAGAGCCCTCACTCGAGAAATCTTCTTGAATATCTTCAAGTACAGTGGGG | HL435370 | 12966 |             |             |             | 1.5533795   | 1.7565499   | 0.09247027  |
| CKL5  | NM_003159_b0273_R  | ACCTAAAGAGCCCTCACTCGAGAAATCTTCTTGAATATCTTCAAGTACAGTGGGG | HL435370 | 1546  |             |             |             | 0.1687265   | 0.4524389   | 1.20812804  |
| CKL5  | NM_003159_b0274_R  | ACCTAAAGAGCCCTCACTCGAGAAATCTTCTTGAATATCTTCAAGTACAGTGGGG | HL435370 | 6022  | -0.71136667 | 0.85071849  | 0.13951456  | -0.00181347 | 0.59814602  | 0.99546532  |
| CKL5  | NM_003159_b0275_R  | ACCTAAAGAGCCCTCACTCGAGAAATCTTCTTGAATATCTTCAAGTACAGTGGGG | HL435370 | 12298 | -0.862725   | 1.00840059  | 0.06503126  |             |             |             |
| CKL5  | NM_003159_b0276_R  | ACCTAAAGAGCCCTCACTCGAGAAATCTTCTTGAATATCTTCAAGTACAGTGGGG | HL435370 | 2549  | -0.80052667 | 0.31938124  | 0.05292222  |             |             |             |
| CKN1A | NM_078467_b0674_R  | ACCTAAAGAGCCCTCACTCGAGAAATCTTCTTGAATATCTTCAAGTACAGTGGGG | HL370771 | 7925  | -0.6772625  | 0.26643125  | 0.00740683  |             |             |             |
| CKN1A | NM_078467_b0675_R  | ACCTAAAGAGCCCTCACTCGAGAAATCTTCTTGAATATCTTCAAGTACAGTGGGG | HL370771 | 13301 | 0.5448265   | 0.24076071  | 0.01420262  |             |             |             |
| CKN1A | NM_078467_b0676_R  | ACCTAAAGAGCCCTCACTCGAGAAATCTTCTTGAATATCTTCAAGTACAGTGGGG | HL370771 | 2551  | 0.6397935   | 0.56202309  | 0.06338486  |             |             |             |
| CKN1A | NM_078467_b0677_R  | ACCTAAAGAGCCCTCACTCGAGAAATCTTCTTGAATATCTTCAAGTACAGTGGGG | HL370771 | 7927  | 0.5032375   | 0.30789051  | 0.04203200  |             |             |             |
| CKN1A | NM_078467_b0678_R  | ACCTAAAGAGCCCTCACTCGAGAAATCTTCTTGAATATCTTCAAGTACAGTGGGG | HL370771 | 13303 | 0.3304125   | 0.47994831  | 0.25439322  |             |             |             |
| CKN1B | NM_004064_b0161_R  | ACCTAAAGAGCCCTCACTCGAGAAATCTTCTTGAATATCTTCAAGTACAGTGGGG | HL28990  | 2925  | -0.2644     | 0.28027485  | 0.09169819  |             |             |             |
| CKN1B | NM_004064_b0162_R  | ACCTAAAGAGCCCTCACTCGAGAAATCTTCTTGAATATCTTCAAGTACAGTGGGG | HL28990  | 8591  | -0.463825   | 0.75941153  | 0.061749217 |             |             |             |
| CKN1B | NM_004064_b0163_R  | ACCTAAAGAGCCCTCACTCGAGAAATCTTCTTGAATATCTTCAAGTACAGTGGGG | HL28990  | 13967 | -0.462125   | 0.28901245  | 0.04078186  |             |             |             |
| CKN1B | NM_004064_b0164_R  | ACCTAAAGAGCCCTCACTCGAGAAATCTTCTTGAATATCTTCAAGTACAGTGGGG | HL28990  | 3241  | 0.29355     | 0.24740608  | 0.01197974  |             |             |             |
| CKN1B | NM_004064_b0165_R  | ACCTAAAGAGCCCTCACTCGAGAAATCTTCTTGAATATCTTCAAGTACAGTGGGG | HL28990  | 8617  | 0.601125    | 0.24269373  | 0.014568779 |             |             |             |
| CKN1B | NM_004064_b0166_R  | ACCTAAAGAGCCCTCACTCGAGAAATCTTCTTGAATATCTTCAAGTACAGTGGGG | HL28990  | 13903 | 0.389625    | 0.24623312  | 0.01430311  |             |             |             |
| CKN1B | NM_004064_b0167_R  | ACCTAAAGAGCCCTCACTCGAGAAATCTTCTTGAATATCTTCAAGTACAGTGGGG | HL28990  | 3213  | -0.69777333 | 0.59687851  | 0.07932103  |             |             |             |
| CKN1B | NM_004064_b0168_R  | ACCTAAAGAGCCCTCACTCGAGAAATCTTCTTGAATATCTTCAAGTACAGTGGGG | HL28990  | 13968 | 0.129       |             |             |             |             |             |
| CKN1B | NM_004064_b0169_R  | ACCTAAAGAGCCCTCACTCGAGAAATCTTCTTGAATATCTTCAAGTACAGTGGGG | HL28990  | 13965 | -0.94975    | 0.30432651  | 0.02869674  |             |             |             |
| CKN1C | BC174000_b01279_R  | ACCTAAAGAGCCCTCACTCGAGAAATCTTCTTGAATATCTTCAAGTACAGTGGGG | HL106070 | 4415  | 0.00735     | 0.1384332   | 0.71263012  | 1.3602      | 0.07407034  | 0.00027388  |
| CKN1C | BC174000_b01280_R  | ACCTAAAGAGCCCTCACTCGAGAAATCTTCTTGAATATCTTCAAGTACAGTGGGG | HL106070 | 9787  | 0.04        | 0.204954    | 0.77232292  | 0.3605      | 0.252684    | 0.19213806  |
| CKN1C | BC174000_b01281_R  | ACCTAAAGAGCCCTCACTCGAGAAATCTTCTTGAATATCTTCAAGTACAGTGGGG | HL106070 | 15163 | 0.144875    | 0.24002098  | 0.40528182  | 1.3719      | 0.212284    | 0.00076973  |
| CKN1C | BC174000_b01282_R  | ACCTAAAGAGCCCTCACTCGAGAAATCTTCTTGAATATCTTCAAGTACAGTGGGG | HL106070 | 4407  | 0.712975    | 0.20020079  | 0.00230279  | 0.04733333  | 0.2917556   | 0.113266093 |
| CKN1C | BC174000_b01283_R  | ACCTAAAGAGCCCTCACTCGAGAAATCTTCTTGAATATCTTCAAGTACAGTGGGG | HL106070 | 9783  | 0.95896667  | 0.08509572  | 0.004701167 | 0.333575    | 0.5190266   | 0.24201048  |
| CKN1C | BC174000_b01284_R  | ACCTAAAGAGCCCTCACTCGAGAAATCTTCTTGAATATCTTCAAGTACAGTGGGG | HL106070 | 15169 | 0.00000000  | 0.30082603  | 0.00624375  | 0.12131437  | 0.13208995  | 0.05459598  |
| CKN1C | BC174000_b01285_R  | ACCTAAAGAGCCCTCACTCGAGAAATCTTCTTGAATATCTTCAAGTACAGTGGGG | HL106070 | 4409  | 0.86262     | 0.86598173  | 0.06940399  | 1.8767      | 0.02293117  | 0.00463962  |
| CKN1C | BC174000_b01286_R  | ACCTAAAGAGCCCTCACTCGAGAAATCTTCTTGAATATCTTCAAGTACAGTGGGG | HL106070 | 9784  | 0.04025     | 0.78872205  | 0.02012995  | 2.64949566  | 1.2161516   | 0.001827399 |
| CKN1C | BC174000_b01287_R  | ACCTAAAGAGCCCTCACTCGAGAAATCTTCTTGAATATCTTCAAGTACAGTGGGG | HL106070 | 15161 | 0.6815      | 1.04466868  | 0.16688116  | 2.7931      | 0.2178923   | 0.20556100  |
| CKN2A | NM_058197_b022_R   | ACCTAAAGAGCCCTCACTCGAGAAATCTTCTTGAATATCTTCAAGTACAGTGGGG | HL51299  | 1247  | 0.562525    | 0.1829444   | 0.05178598  | -0.437      | 0.25281802  | 0.07632524  |
| CKN2A | NM_058197_b023_R   | ACCTAAAGAGCCCTCACTCGAGAAATCTTCTTGAATATCTTCAAGTACAGTGGGG | HL51299  | 662   | 0.41297875  | 0.322832    | 0.00740683  | -0.483      | 0.1881222   | 0.067955393 |
| CKN2A | NM_058197_b024_R   | ACCTAAAGAGCCCTCACTCGAGAAATCTTCTTGAATATCTTCAAGTACAGTGGGG | HL51299  | 11999 | 0.5478625   | 0.27299198  | 0.028237326 | -0.463      | 0.1817499   | 0.060235475 |
| CKN2A | NM_058197_b025_R   | ACCTAAAGAGCCCTCACTCGAGAAATCTTCTTGAATATCTTCAAGTACAGTGGGG | HL51299  | 2545  | 0.119295    | 0.24532473  | 0.2579255   | 1.617175    | 0.19101526  | 0.009828967 |
| CKN2A | NM_058197_b026_R   | ACCTAAAGAGCCCTCACTCGAGAAATCTTCTTGAATATCTTCAAGTACAGTGGGG | HL51299  | 7921  | -1.23465    | 0.18748731  | 0.002258486 | 1.097255    | 0.2476787   | 0.00140378  |
| CKN2A | NM_058197_b027_R   | ACCTAAAGAGCCCTCACTCGAGAAATCTTCTTGAATATCTTCAAGTACAGTGGGG | HL51299  | 1237  | -1.6888233  | 0.31749778  | 0.00092578  | 1.166875    | 0.114606    | 0.00000000  |
| CKN2A | NM_058197_b028_R   | ACCTAAAGAGCCCTCACTCGAGAAATCTTCTTGAATATCTTCAAGTACAGTGGGG | HL51299  | 2547  | -0.9573773  | 0.5612099   | 0.14788081  | -0.2898     | 0.6145006   | 0.3455577   |
| CKN2A | NM_058197_b029_R   | ACCTAAAGAGCCCTCACTCGAGAAATCTTCTTGAATATCTTCAAGTACAGTGGGG | HL51299  | 7829  | -0.43247495 | 0.27817121  | 0.17246449  | -0.264      | 0.5643778   | 0.26311168  |
| CKN2A | NM_058197_b030_R   | ACCTAAAGAGCCCTCACTCGAGAAATCTTCTTGAATATCTTCAAGTACAGTGGGG | HL51299  | 12399 | 0.3805735   | 0.5268184   | 0.2084797   | -0.28925    | 0.5726805   | 0.2415048   |
| CKN2C | AB019170_b02121_R  | ACCTAAAGAGCCCTCACTCGAGAAATCTTCTTGAATATCTTCAAGTACAGTGGGG | HL52324  | 4103  |             |             |             | 0.0771      | 0.46416562  | 0.79370105  |
| CKN2C | AB019170_b02122_R  | ACCTAAAGAGCCCTCACTCGAGAAATCTTCTTGAATATCTTCAAGTACAGTGGGG | HL52324  | 949   |             |             |             | -0.09181127 | 0.79811317  |             |
| CKN2C | AB019170_b02123_R  | ACCTAAAGAGCCCTCACTCGAGAAATCTTCTTGAATATCTTCAAGTACAGTGGGG | HL52324  | 4485  |             |             |             | 0.01103333  | 0.56891348  | 0.97487824  |
| CKN2C | AB019170_b02124_R  | ACCTAAAGAGCCCTCACTCGAGAAATCTTCTTGAATATCTTCAAGTACAGTGGGG | HL52324  | 4099  | -0.291265   | 0.22515488  | 0.12024078  | 0.0428      | 0.13528909  | 0.08468691  |
| CKN2C | AB019170_b02125_R  | ACCTAAAGAGCCCTCACTCGAGAAATCTTCTTGAATATCTTCAAGTACAGTGGGG | HL52324  | 9475  | -0.1877375  | 0.25311895  | 0.136223443 | 0.124785    | 0.11829417  | 0.04788204  |
| CKN2C | AB019170_b02126_R  | ACCTAAAGAGCCCTCACTCGAGAAATCTTCTTGAATATCTTCAAGTACAGTGGGG | HL52324  | 14851 | -0.208428   | 0.24532473  | 0.005474337 | 0.165214    | 0.13528909  | 0.08468691  |
| CKN2C | AB019170_b02127_R  | ACCTAAAGAGCCCTCACTCGAGAAATCTTCTTGAATATCTTCAAGTACAGTGGGG | HL52324  | 4101  | -0.7288785  | 0.51149599  | 0.02728233  | -0.0465     | 0.41529454  | 0.862132681 |
| CKN2C | AB019170_b02128_R  | ACCTAAAGAGCCCTCACTCGAGAAATCTTCTTGAATATCTTCAAGTACAGTGGGG | HL52324  | 9477  | -0.6918875  | 0.37865621  | 0.01648711  | -0.2775     | 0.279631    | 0.88796717  |
| CKN2C | AB019170_b02129_R  | ACCTAAAGAGCCCTCACTCGAGAAATCTTCTTGAATATCTTCAAGTACAGTGGGG | HL52324  | 14853 | 0.6881485   | 0.4488322   | 0.00472817  | 0.364       | 0.4796823   | 0.818995103 |
| CEBA  | NM_004384_b01035_R | ACCTAAAGAGCCCTCACTCGAGAAATCTTCTTGAATATCTTCAAGTACAGTGGGG | HL590973 | 1245  | 0.1758375   | 0.3327374   | 0.49573759  | 0.00495     | 0.1750548   | 0.97955349  |
| CEBA  | NM_004384_b01036_R | ACCTAAAGAGCCCTCACTCGAGAAATCTTCTTGAATATCTTCAAGTACAGTGGGG | HL590973 | 6621  | 0.00000000  | 0.45016768  | 0.798424829 | 0.042923    | 0.138837683 | 0.88537063  |
| CEBA  | NM_004384_b01037_R | ACCTAAAGAGCCCTCACTCGAGAAATCTTCTTGAATATCTTCAAGTACAGTGGGG | HL590973 | 11997 | 0.1844255   | 0.4264284   | 0.515450073 | 0.004925    | 0.1105685   | 0.80015811  |
| CEBA  | NM_004384_b01038_R | ACCTAAAGAGCCCTCACTCGAGAAATCTTCTTGAATATCTTCAAGTACAGTGGGG | HL590973 | 1246  | 0.00000000  | 0.47295768  | 0.798424829 | 0.042923    | 0.138837683 | 0.88537063  |
| CEBA  | NM_004384_b01039_R | ACCTAAAGAGCCCTCACTCGAGAAATCTTCTTGAATATCTTCAAGTACAGTGGGG | HL590973 | 6622  | 0.1476626   | 1.4851451   | 0.118807241 | -0.474      | 0.7784995   | 0.91746263  |
| CEBA  | NM_004384_b01040_R | ACCTAAAGAGCCCTCACTCGAGAAATCTTCTTGAATATCTTCAAGTACAGTGGGG | HL590973 | 11998 | 0.00000000  | 0.39972009  | 0.20089284  | 0.00000000  | 0.3682617   | 0.89949405  |
| CEBA  | NM_004384_b01041_R | ACCTAAAGAGCCCTCACTCGAGAAATCTTCTTGAATATCTTCAAGTACAGTGGGG | HL590973 | 1244  | 0.7702125   | 0.25348008  | 0.04112322  | 0.0475      | 0.4415154   | 0.85828361  |
| CEBA  | NM_004384_b01042_R | ACCTAAAGAGCCCTCACTCGAGAAATCTTCTTGAATATCTTCAAGTACAGTGGGG | HL590973 | 6620  | -0.791525   | 0.2514051   | 0.00324676  | -0.0712     | 0.49397874  | 0.95891677  |
| CEBA  | NM_004384_b01043_R | ACCTAAAGAGCCCTCACTCGAGAAATCTTCTTGAATATCTTCAAGTACAGTGGGG | HL590973 | 11999 | 0.703735    | 0.24740608  | 0.01399691  | 0.0623      | 0.4796823   | 0.818995103 |
| CEBA  | NM_004384_b01044_R | ACCTAAAGAGCCCTCACTCGAGAAATCTTCTTGAATATCTTCAAGTACAGTGGGG | HL590973 | 2519  | -0.1039765  | 0.280124    | 0.00139972  | -0.82275    | 0.46325447  | 0.91479088  |
| CEBA  | NM_004             |                                                         |          |       |             |             |             |             |             |             |

|      |                    |                                                           |           |            |            |             |             |             |            |             |            |             |            |
|------|--------------------|-----------------------------------------------------------|-----------|------------|------------|-------------|-------------|-------------|------------|-------------|------------|-------------|------------|
| CHX1 | NM_001274_361493.R | ACCTAAAAGGAGTGGATGGATGAACTTAACTTCGATTAAGCAATCAATCAATCCCGG | HL_24529  | 1589       | 9.2744     | 0.17329263  | 3.94E-05    | -1.93156667 | 3.12872786 | 0.24266133  |            |             |            |
| CHX1 | NM_001274_361493.R | ACCTAAAAGGAGTGGATGGATGAACTTAACTTCGATTAAGCAATCAATCAATCCCGG | HL_24529  | 5986       | 9.2744     | 0.17329263  | 3.94E-05    | -1.93156667 | 3.12872786 | 0.24266133  |            |             |            |
| CHX1 | NM_001274_361493.R | ACCTAAAAGGAGTGGATGGATGAACTTAACTTCGATTAAGCAATCAATCAATCCCGG | HL_24529  | 1341       | 10.1533    | 0.1930584   | 3.0E-05     | -0.88743333 | 1.9600007  | 0.374039129 |            |             |            |
| CHX1 | NM_001274_361493.R | ACCTAAAAGGAGTGGATGGATGAACTTAACTTCGATTAAGCAATCAATCAATCCCGG | HL_24529  | 6967       |            |             |             |             |            |             |            |             |            |
| CHX1 | NM_001274_361493.R | ACCTAAAAGGAGTGGATGGATGAACTTAACTTCGATTAAGCAATCAATCAATCCCGG | HL_24529  | 12343      |            |             |             |             |            |             |            |             |            |
| CHX1 | NM_001274_361493.R | ACCTAAAAGGAGTGGATGGATGAACTTAACTTCGATTAAGCAATCAATCAATCCCGG | HL_24529  | 0          | -0.38355   | 0.45829951  | 0.01282719  | -0.1238975  | 0.45780339 | 0.611138039 |            |             |            |
| CHX1 | NM_001274_361493.R | ACCTAAAAGGAGTGGATGGATGAACTTAACTTCGATTAAGCAATCAATCAATCCCGG | HL_24529  | 5396       | -0.841255  | 0.4571637   | 0.01205733  | -0.1009265  | 0.44479028 | 0.871452322 |            |             |            |
| CHX1 | NM_001274_361493.R | ACCTAAAAGGAGTGGATGGATGAACTTAACTTCGATTAAGCAATCAATCAATCCCGG | HL_24529  | 10772      | -0.26355   | 0.44740324  | 0.01409804  | -0.0518575  | 0.44740324 | 0.798233769 |            |             |            |
| CHX2 | NM_001274_361239.R | ACCTAAAAGGAGTGGATGGATGAACTTAACTTCGATTAAGCAATCAATCAATCCCGG | HL_29163  | 11         | -0.151555  | 0.91742324  | 0.67938083  | -0.0407125  | 0.11430476 | 0.832797192 |            |             |            |
| CHX2 | NM_001274_361239.R | ACCTAAAAGGAGTGGATGGATGAACTTAACTTCGATTAAGCAATCAATCAATCCCGG | HL_29163  | 5407       | 0.000000   | 0.99999999  | 0.00000000  | 0.24475     | 0.26047693 | 0.248162121 |            |             |            |
| CHX2 | NM_001274_361239.R | ACCTAAAAGGAGTGGATGGATGAACTTAACTTCGATTAAGCAATCAATCAATCCCGG | HL_29163  | 10783      | -0.009375  | 0.99725783  | 0.86328048  | -0.002125   | 0.2424474  | 0.895978663 |            |             |            |
| CHX2 | NM_001274_361239.R | ACCTAAAAGGAGTGGATGGATGAACTTAACTTCGATTAAGCAATCAATCAATCCCGG | HL_29163  | 52         | 0.683255   | 0.5542663   | 0.041102765 | -0.1002625  | 0.11068209 | 0.606433792 |            |             |            |
| CHX2 | NM_001274_361239.R | ACCTAAAAGGAGTGGATGGATGAACTTAACTTCGATTAAGCAATCAATCAATCCCGG | HL_29163  | 5408       | 0.89993133 | 0.5336411   | 0.00000000  | -0.17245    | 0.3860964  | 0.50780634  |            |             |            |
| CHX2 | NM_001274_361239.R | ACCTAAAAGGAGTGGATGGATGAACTTAACTTCGATTAAGCAATCAATCAATCCCGG | HL_29163  | 10784      | 0.738425   | 0.53797241  | 0.02981083  | -0.031075   | 0.1166427  | 0.874524204 |            |             |            |
| CHX2 | NM_001274_361239.R | ACCTAAAAGGAGTGGATGGATGAACTTAACTTCGATTAAGCAATCAATCAATCCCGG | HL_29163  | 5409       | 0.30773    | 0.11166636  | 0.77824208  | 0.0080975   | 0.3027875  | 0.800533099 |            |             |            |
| CHX2 | NM_001274_361239.R | ACCTAAAAGGAGTGGATGGATGAACTTAACTTCGATTAAGCAATCAATCAATCCCGG | HL_29163  | 10785      | 0.1        | 0.57629203  | 0.704265126 | 0.028575    | 0.4323257  | 0.933888664 |            |             |            |
| CHX2 | NM_001274_361239.R | ACCTAAAAGGAGTGGATGGATGAACTTAACTTCGATTAAGCAATCAATCAATCCCGG | HL_29163  | 14727      | -0.2254785 | 0.29761658  | 0.19544024  | -0.179975   | 0.34492624 | 0.588159761 |            |             |            |
| CH2  | AC126784_361343.R  | ACCTAAAAGGAGTGGATGGATGAACTTAACTTCGATTAAGCAATCAATCAATCCCGG | 3979      | 1.1576125  | 0.33651181 | 0.001456009 |             |             |            | 0.1644      | 0.3145741  | 0.465679204 |            |
| CH2  | AC126784_361343.R  | ACCTAAAAGGAGTGGATGGATGAACTTAACTTCGATTAAGCAATCAATCAATCCCGG | 9385      | 1.1018735  | 0.30770761 | 0.00149685  |             |             |            | 0.268       | 0.1899953  | 0.222839801 |            |
| CH2  | AC126784_361343.R  | ACCTAAAAGGAGTGGATGGATGAACTTAACTTCGATTAAGCAATCAATCAATCCCGG | 14731     | 1.594252   | 0.33139118 | 0.01413189  |             |             |            | 0.29715     | 0.1858445  | 0.220770562 |            |
| CH2  | AC126784_361343.R  | ACCTAAAAGGAGTGGATGGATGAACTTAACTTCGATTAAGCAATCAATCAATCCCGG | 3977      | 0.6248125  | 0.2504912  | 0.01179194  |             |             |            | 0.17625     | 0.2302749  | 0.4151307   |            |
| CH2  | AC126784_361343.R  | ACCTAAAAGGAGTGGATGGATGAACTTAACTTCGATTAAGCAATCAATCAATCCCGG | 9383      | 0.5163975  | 0.3682918  | 0.02147828  |             |             |            | 0.24475     | 0.26047693 | 0.248162121 |            |
| CH2  | AC126784_361343.R  | ACCTAAAAGGAGTGGATGGATGAACTTAACTTCGATTAAGCAATCAATCAATCCCGG | 14729     | 0.3388785  | 0.1864605  | 0.072388227 |             |             |            | 0.2827      | 0.2464838  | 0.206838248 |            |
| CH2  | AC126784_361343.R  | ACCTAAAAGGAGTGGATGGATGAACTTAACTTCGATTAAGCAATCAATCAATCCCGG | 3975      | -0.1227525 | 0.2056601  | 0.11476973  |             |             |            | 0.154251    | 0.5341585  | 0.704325025 |            |
| CH2  | AC126784_361343.R  | ACCTAAAAGGAGTGGATGGATGAACTTAACTTCGATTAAGCAATCAATCAATCCCGG | 9351      | -0.4095125 | 0.34918081 | 0.07984589  |             |             |            | 0.248       | 0.3794877  | 0.32319126  |            |
| CH2  | AC126784_361343.R  | ACCTAAAAGGAGTGGATGGATGAACTTAACTTCGATTAAGCAATCAATCAATCCCGG | 14727     | -0.2254785 | 0.29761658 | 0.19544024  |             |             |            | 0.07875     | 0.3364666  | 0.60996337  |            |
| CHK  | NM_001278_361420.R | ACCTAAAAGGAGTGGATGGATGAACTTAACTTCGATTAAGCAATCAATCAATCCCGG | HL_189898 | 1593       | 1.64285    | 1.5895315   | 0.04720463  | -0.3241375  | 0.5867927  | 0.29267258  |            |             |            |
| CHK  | NM_001278_361420.R | ACCTAAAAGGAGTGGATGGATGAACTTAACTTCGATTAAGCAATCAATCAATCCCGG | HL_189898 | 6869       | 0.29575    | 1.7465289   | 0.0912641   | -0.2637375  | 0.3818037  | 0.37814414  |            |             |            |
| CHK  | NM_001278_361420.R | ACCTAAAAGGAGTGGATGGATGAACTTAACTTCGATTAAGCAATCAATCAATCCCGG | HL_189898 | 12345      | 1.594252   | 0.1628402   | 0.04646685  | -0.2607125  | 0.5844222  | 0.38219124  |            |             |            |
| CHK  | NM_001278_361420.R | ACCTAAAAGGAGTGGATGGATGAACTTAACTTCGATTAAGCAATCAATCAATCCCGG | HL_189898 | 21         | -0.30905   | 0.1434748   | 0.0852911   | -0.2324125  | 0.156157   | 0.17231104  |            |             |            |
| CHK  | NM_001278_361420.R | ACCTAAAAGGAGTGGATGGATGAACTTAACTTCGATTAAGCAATCAATCAATCCCGG | HL_189898 | 5907       | 0.3152     | 0.1308474   | 0.07221905  | -0.1527125  | 0.1450606  | 0.33218441  |            |             |            |
| CHK  | NM_001278_361420.R | ACCTAAAAGGAGTGGATGGATGAACTTAACTTCGATTAAGCAATCAATCAATCCCGG | HL_189898 | 10777      | -0.39775   | 0.0945777   | 0.04640348  | -0.245265   | 0.2243681  | 0.18032605  |            |             |            |
| CHK  | NM_001278_361420.R | ACCTAAAAGGAGTGGATGGATGAACTTAACTTCGATTAAGCAATCAATCAATCCCGG | HL_189898 | 22         | 0.708755   | 0.4205731   | 0.04065617  | -0.341875   | 0.2229718  | 0.19246444  |            |             |            |
| CHK  | NM_001278_361420.R | ACCTAAAAGGAGTGGATGGATGAACTTAACTTCGATTAAGCAATCAATCAATCCCGG | HL_189898 | 5398       | 0.687825   | 0.4191118   | 0.05747116  | -0.218175   | 0.1987864  | 0.21812004  |            |             |            |
| CHK  | NM_001278_361420.R | ACCTAAAAGGAGTGGATGGATGAACTTAACTTCGATTAAGCAATCAATCAATCCCGG | HL_189898 | 10774      | 0.29575    | 0.1742668   | 0.00000000  | -0.17245    | 0.3860964  | 0.50780634  |            |             |            |
| CHK  | NM_001278_361420.R | ACCTAAAAGGAGTGGATGGATGAACTTAACTTCGATTAAGCAATCAATCAATCCCGG | HL_189898 | 5397       | -0.3884    | 0.2328564   | 0.01378837  | -0.46413333 | 0.18458671 | 0.31957209  |            |             |            |
| CHK  | NM_001278_361420.R | ACCTAAAAGGAGTGGATGGATGAACTTAACTTCGATTAAGCAATCAATCAATCCCGG | HL_189898 | 11449      | -0.67675   | 0.2602389   | 0.00929569  | -0.44746667 | 0.8820183  | 0.36469673  |            |             |            |
| CHK  | NM_001278_361420.R | ACCTAAAAGGAGTGGATGGATGAACTTAACTTCGATTAAGCAATCAATCAATCCCGG | HL_189898 | 397        |            |             |             |             |            |             |            |             |            |
| CHK  | NM_001278_361420.R | ACCTAAAAGGAGTGGATGGATGAACTTAACTTCGATTAAGCAATCAATCAATCCCGG | HL_189898 | 11994      | 0.9        | 0.4126      | 0.13699129  | 0.3512673   | 0.7947333  | 0.8780282   | 0.13968609 |             |            |
| CHK  | NM_001278_361420.R | ACCTAAAAGGAGTGGATGGATGAACTTAACTTCGATTAAGCAATCAATCAATCCCGG | HL_189898 | 5714       | 0.48885    | 0.8441682   | 0.00000000  | -1.2008     | 0.0820868  | 0.1654002   |            |             |            |
| CHK  | NM_001278_361420.R | ACCTAAAAGGAGTGGATGGATGAACTTAACTTCGATTAAGCAATCAATCAATCCCGG | HL_189898 | 1150       | 0.446275   | 1.8556357   | 0.56548507  | 1.282866667 | 1.1246515  | 0.07794347  |            |             |            |
| CHK  | NM_001278_361420.R | ACCTAAAAGGAGTGGATGGATGAACTTAACTTCGATTAAGCAATCAATCAATCCCGG | HL_189898 | 7285       | 3.26885    | 0.2907661   | 0.00000000  |             |            |             |            |             |            |
| CHK  | NM_001278_361420.R | ACCTAAAAGGAGTGGATGGATGAACTTAACTTCGATTAAGCAATCAATCAATCCCGG | HL_189898 | 12661      | 4.11699    | 0.3489757   | 0.0613125   |             |            |             |            |             |            |
| CHK  | NM_001278_361420.R | ACCTAAAAGGAGTGGATGGATGAACTTAACTTCGATTAAGCAATCAATCAATCCCGG | HL_189898 | 1969       | 0.446275   | 1.8556357   | 0.56548507  |             |            |             |            |             |            |
| CHK  | NM_001278_361420.R | ACCTAAAAGGAGTGGATGGATGAACTTAACTTCGATTAAGCAATCAATCAATCCCGG | HL_189898 | 3578       | 1.166875   | 0.4747078   | 0.624712822 |             |            | -0.424775   | 0.6289417  | 0.188551999 |            |
| CH2D | AF109141_361468.R  | ACCTAAAAGGAGTGGATGGATGAACTTAACTTCGATTAAGCAATCAATCAATCCCGG | HL_82071  | 8954       | 0.0189265  | 0.4879666   | 0.93713678  |             |            | 0.008075    | 0.4950022  | 0.99722884  |            |
| CH2D | AF109141_361468.R  | ACCTAAAAGGAGTGGATGGATGAACTTAACTTCGATTAAGCAATCAATCAATCCCGG | HL_82071  | 14310      | 0.02602    | 0.4454498   | 0.90000000  |             |            | 0.62602     | 0.2524744  | 0.02024183  |            |
| CH2D | AF109141_361468.R  | ACCTAAAAGGAGTGGATGGATGAACTTAACTTCGATTAAGCAATCAATCAATCCCGG | HL_82071  | 3552       | -0.1401125 | 0.5782846   | 0.60986111  |             |            | 0.3427      | 0.1853959  | 0.12308648  |            |
| CH2D | AF109141_361468.R  | ACCTAAAAGGAGTGGATGGATGAACTTAACTTCGATTAAGCAATCAATCAATCCCGG | HL_82071  | 204825     | 0.4086785  | 0.4986785   | 0.39949444  |             |            | 0.282575    | 0.4581929  | 0.469649642 |            |
| CH2D | AF109141_361468.R  | ACCTAAAAGGAGTGGATGGATGAACTTAACTTCGATTAAGCAATCAATCAATCCCGG | HL_82071  | 14304      | -0.746125  | 0.6485282   | 0.80179352  |             |            | 0.13175     | 0.1921467  | 0.15665846  |            |
| CH2D | AF109141_361468.R  | ACCTAAAAGGAGTGGATGGATGAACTTAACTTCGATTAAGCAATCAATCAATCCCGG | HL_82071  | 3550       | 0.2126625  | 0.5197266   | 0.00000000  |             |            | 0.49091     | 0.5075164  | 0.18209978  |            |
| CH2D | AF109141_361468.R  | ACCTAAAAGGAGTGGATGGATGAACTTAACTTCGATTAAGCAATCAATCAATCCCGG | HL_82071  | 8206       | 0.2669475  | 0.6477288   | 0.00072427  |             |            | -0.12225    | 0.3089189  | 0.58153261  |            |
| CH2D | AF109141_361468.R  | ACCTAAAAGGAGTGGATGGATGAACTTAACTTCGATTAAGCAATCAATCAATCCCGG | HL_82071  | 204825     | 0.2511375  | 0.4007964   | 0.00000000  |             |            | 0.3614533   | 0.2215204  | 0.18899164  |            |
| CH2D | AF109141_361468.R  | ACCTAAAAGGAGTGGATGGATGAACTTAACTTCGATTAAGCAATCAATCAATCCCGG | HL_82071  | 2511       | 1.68685    | 0.7607726   | 0.0094777   |             |            | 0.43875     | 0.3075961  | 0.21248474  |            |
| CH2D | AF109141_361468.R  | ACCTAAAAGGAGTGGATGGATGAACTTAACTTCGATTAAGCAATCAATCAATCCCGG | HL_82071  | 7887       | 2.7529875  | 1.3081736   | 0.00134884  |             |            | 0.44626     | 0.9372583  | 0.24878862  |            |
| CH2D | AF109141_361468.R  | ACCTAAAAGGAGTGGATGGATGAACTTAACTTCGATTAAGCAATCAATCAATCCCGG | HL_82071  | 13243      | 2.797825   | 0.9001709   | 0.00000000  |             |            | 0.217823    | 0.86025871 | 0.56119339  |            |
| CH2D | AF109141_361468.R  | ACCTAAAAGGAGTGGATGGATGAACTTAACTTCGATTAAGCAATCAATCAATCCCGG | HL_82071  | 1224       | 0.0396265  | 0.2350349   | 0.76912195  |             |            | 0.5226      | 0.3247691  | 0.08086787  |            |
| CH2D | AF109141_361468.R  | ACCTAAAAGGAGTGGATGGATGAACTTAACTTCGATTAAGCAATCAATCAATCCCGG | HL_82071  | 660        | 0.074125   | 0.2899164   | 0.00000000  |             |            | 0.4797      | 0.4581929  | 0.469649642 |            |
| CH2D | AF109141_361468.R  | ACCTAAAAGGAGTGGATGGATGAACTTAACTTCGATTAAGCAATCAATCAATCCCGG | HL_82071  | 11976      | 0.1103735  | 0.2304436   | 0.6884124   |             |            | 0.4826      | 0.4430331  | 0.08917608  |            |
| CH2D | AF109141_361468.R  | ACCTAAAAGGAGTGGATGGATGAACTTAACTTCGATTAAGCAATCAATCAATCCCGG | HL_82071  | 2509       | 0.3872625  | 0.4007964   | 0.00000000  |             |            | 0.49091     | 0.5075164  | 0.18209978  |            |
| CH2D | AF109141_361468.R  | ACCTAAAAGGAGTGGATGGATGAACTTAACTTCGATTAAGCAATCAATCAATCCCGG | HL_82071  | 7885       | 1.889075   | 0.2172854   | 0.0001881   |             |            | 0.662925    | 1.0154433  | 0.17191357  |            |
| CH2D | AF109141_361468.R  | ACCTAAAAGGAGTGGATGGATGAACTTAACTTCGATTAAGCAATCAATCAATCCCGG | HL_82071  | 13261      | 1.4784875  | 0.3999721   | 0.00063035  |             |            | 0.512775    | 1.0798004  | 0.27481307  |            |
| CH2D | AF109141_361468.R  | ACCTAAAAGGAGTGGATGGATGAACTTAACTTCGATTAAGCAATCAATCAATCCCGG | HL_82071  | 4323       | 1.0181     | 0.1170208   | 0.00000000  | 0.47725     | 0.5824054  | 0.14681234  | 0.10975133 |             |            |
| CH2D | AF109141_361468.R  | ACCTAAAAGGAGTGGATGGATGAACTTAACTTCGATTAAGCAATCAATCAATCCCGG | HL_82071  | 9699       | 0.962035   | 1.1897041   | 0.1002864   | 0.81395     | 0.1426323  | 0.00146136  | -0.8997667 | 0.75589     | 0.05948429 |
| CH2D | AF109141_361468.R  | ACCTAAAAGGAGTGGATGGATGAACTTAACTTCGATTAAGCAATCAATCAATCCCGG | HL_82071  | 15075      | 4.2525     | 0.2502368   | 0.00000000  |             |            | 0.63745     | 0.8878315  | 0.19788606  |            |
| CH2D | AF109141_361468.R  | ACCTAAAAGGAGTGGATGGATGAACTTAACTTCGATTAAGCAATCAATCAATCCCGG | HL_82071  | 4321       | -0.22668   | 0.5787964   | 0.          |             |            |             |            |             |            |



|        |                    |                                                      |         |       |            |            |             |             |            |            |             |             |             |            |
|--------|--------------------|------------------------------------------------------|---------|-------|------------|------------|-------------|-------------|------------|------------|-------------|-------------|-------------|------------|
| COE1C1 | BF16150_36965_R    | ACCTAAAAGGACAGCCTGGAGGACAGCATCTTCGATCTTCAGCTGGCTCCGG | HL32683 | 9691  | 1.175375   | 0.5178305  | 0.00415554  | 0.11556667  | 0.0899364  | 0.54578489 | 3.5419      | 3.15229965  | 0.027142789 |            |
| COE1C1 | BF16150_36965_R    | ACCTAAAAGGACAGCCTGGAGGACAGCATCTTCGATCTTCAGCTGGCTCCGG | HL32683 | 15987 | 0.82766667 | 0.24422222 | 0.03403333  | 0.36701884  | 0.89193046 | 0.29219661 | 2.9807      | 0.021291765 | 0.260291125 |            |
| COF2   | NK_004766_361256_R | ACCTAAAAGGACAGCCTGGAGGACAGCATCTTCGATCTTCAGCTGGCTCCGG | HL37324 | 2630  | 0.018125   | 0.55731275 | 0.89189958  |             |            | -0.2924625 | 0.31948378  | 0.04188802  | 0.188982989 |            |
| COF2   | NK_004766_361256_R | ACCTAAAAGGACAGCCTGGAGGACAGCATCTTCGATCTTCAGCTGGCTCCGG | HL37324 | 8900  | 1.58025    | 0.42243909 | 0.82002666  |             |            | -0.0422222 | 0.26881111  | 0.00000000  | 0.16648434  |            |
| COF2   | NK_004766_361256_R | ACCTAAAAGGACAGCCTGGAGGACAGCATCTTCGATCTTCAGCTGGCTCCGG | HL37324 | 13372 | 0.16025    | 0.42243909 | 0.82002666  |             |            | 0.3791375  | 0.27023939  | 0.00000000  | 0.16648434  |            |
| COF2   | NK_004766_361655_R | ACCTAAAAGGACAGCCTGGAGGACAGCATCTTCGATCTTCAGCTGGCTCCGG | HL37324 | 2624  | 1.58025    | 0.42243909 | 0.82002666  |             |            | 1.0947625  | 1.14799114  | 0.04188802  | 0.188982989 |            |
| COF2   | NK_004766_361655_R | ACCTAAAAGGACAGCCTGGAGGACAGCATCTTCGATCTTCAGCTGGCTCCGG | HL37324 | 8900  | 1.58025    | 0.42243909 | 0.82002666  |             |            | 1.1491125  | 1.16162424  | 0.04188802  | 0.188982989 |            |
| COF2   | NK_004766_361655_R | ACCTAAAAGGACAGCCTGGAGGACAGCATCTTCGATCTTCAGCTGGCTCCGG | HL37324 | 13372 | 1.5775     | 0.2922826  | 0.00029278  |             |            | 0.9433735  | 1.04736070  | 0.05791838  | 0.07006378  |            |
| COF2   | NK_004766_36294_R  | ACCTAAAAGGACAGCCTGGAGGACAGCATCTTCGATCTTCAGCTGGCTCCGG | HL37324 | 2622  | 1.1275     | 1.5727238  | 0.12678544  |             |            | 1.1938789  | 1.1938789   | 0.07006378  | 0.07006378  |            |
| COF2   | NK_004766_36294_R  | ACCTAAAAGGACAGCCTGGAGGACAGCATCTTCGATCTTCAGCTGGCTCCGG | HL37324 | 7396  | 1.00035    | 1.5727238  | 0.12678544  |             |            | 1.873795   | 1.47746693  | 0.07006378  | 0.07006378  |            |
| COF2   | NK_004766_36294_R  | ACCTAAAAGGACAGCCTGGAGGACAGCATCTTCGATCTTCAGCTGGCTCCGG | HL37324 | 13374 | 1.00035    | 1.5727238  | 0.12678544  |             |            | 1.1379625  | 1.81270928  | 0.12678544  | 0.12678544  |            |
| COF8   | NK_198189_361047_R | ACCTAAAAGGACAGCCTGGAGGACAGCATCTTCGATCTTCAGCTGGCTCCGG | HL31313 | 4664  | 0.13063333 | 0.37240170 | 0.33944313  | 0.03348333  | 0.42647603 |            |             | -0.065725   | 1.18485072  | 0.01866845 |
| COF8   | NK_198189_361047_R | ACCTAAAAGGACAGCCTGGAGGACAGCATCTTCGATCTTCAGCTGGCTCCGG | HL31313 | 10040 | 0.18163333 | 0.49765670 | 0.37110453  | -0.0683     | 0.0312412  | 0.40849793 | -0.4539     | 0.34716188  | 0.11807735  | -0.1421    |
| COF8   | NK_198189_361047_R | ACCTAAAAGGACAGCCTGGAGGACAGCATCTTCGATCTTCAGCTGGCTCCGG | HL31313 | 15414 | 0.12766667 | 0.53320466 | 0.40932604  | -0.29116667 | 0.44684284 | 0.42632732 | -0.48746666 | 0.33080255  | 0.2325275   | 0.36431    |
| COF8   | NK_198189_361098_R | ACCTAAAAGGACAGCCTGGAGGACAGCATCTTCGATCTTCAGCTGGCTCCGG | HL31313 | 4660  | -0.2092625 | 0.11915487 | 0.18775905  | -0.5542625  | 0.61812722 | 0.1141334  | 0.317275    | 0.53705882  | 0.22993152  | 0.109825   |
| COF8   | NK_198189_361098_R | ACCTAAAAGGACAGCCTGGAGGACAGCATCTTCGATCTTCAGCTGGCTCCGG | HL31313 | 10036 | 0.4767875  | 0.14242838 | 0.07488204  | -0.16183875 | 0.52134446 | 0.06103376 | 0.3359      | 0.51425782  | 0.238594682 | 0.116071   |
| COF8   | NK_198189_361098_R | ACCTAAAAGGACAGCCTGGAGGACAGCATCTTCGATCTTCAGCTGGCTCCGG | HL31313 | 15412 | -0.3004875 | 0.15811008 | 0.08790941  | -0.15252625 | 0.47200885 | 0.54136743 | 0.3346      | 0.51181108  | 0.22901194  | 0.082675   |
| COF8   | NK_198189_361098_R | ACCTAAAAGGACAGCCTGGAGGACAGCATCTTCGATCTTCAGCTGGCTCCGG | HL31313 | 4662  | 0.4056265  | 0.61620904 | 0.21693136  | -0.1173775  | 0.7932595  | 0.74170958 | 0.20025     | 0.34656072  | 0.238594682 | 0.13851    |
| COF8   | NK_198189_361098_R | ACCTAAAAGGACAGCCTGGAGGACAGCATCTTCGATCTTCAGCTGGCTCCGG | HL31313 | 10038 | 0.1796025  | 0.2498643  | 0.31766997  | -0.1380735  | 0.3894837  | 0.5081959  | 0.25555     | 0.36797534  | 0.2389952   | 0.383475   |
| COF8   | NK_198189_361098_R | ACCTAAAAGGACAGCCTGGAGGACAGCATCTTCGATCTTCAGCTGGCTCCGG | HL31313 | 15414 | -0.0786785 | 0.1873232  | 0.17217064  | 0.15118667  | 0.2693540  | 0.53083863 | 0.02005     | 0.37615516  | 0.26825814  | 0.387675   |
| COF8   | NK_198189_361098_R | ACCTAAAAGGACAGCCTGGAGGACAGCATCTTCGATCTTCAGCTGGCTCCGG | HL31313 | 4662  | 0.349825   | 0.3665318  | 0.3227929   |             |            |            | -0.2750262  | 0.5662095   | 0.34442591  |            |
| COF8   | NK_198189_361098_R | ACCTAAAAGGACAGCCTGGAGGACAGCATCTTCGATCTTCAGCTGGCTCCGG | HL31313 | 10038 | -0.309275  | 0.3743375  | 0.1217236   |             |            |            | -0.3130785  | 0.6083789   | 0.29911075  |            |
| COF8   | NK_198189_361098_R | ACCTAAAAGGACAGCCTGGAGGACAGCATCTTCGATCTTCAGCTGGCTCCGG | HL31313 | 15421 | -0.40346   | 0.3406011  | 0.021499675 |             |            |            | -0.4052375  | 0.29517607  | 0.09829161  |            |
| COF8   | NK_198189_361098_R | ACCTAAAAGGACAGCCTGGAGGACAGCATCTTCGATCTTCAGCTGGCTCCGG | HL31313 | 4660  | -0.2092625 | 0.11915487 | 0.18775905  | -0.5542625  | 0.61812722 | 0.1141334  | 0.317275    | 0.53705882  | 0.22993152  | 0.109825   |
| COF8   | NK_198189_361098_R | ACCTAAAAGGACAGCCTGGAGGACAGCATCTTCGATCTTCAGCTGGCTCCGG | HL31313 | 10036 | 0.4767875  | 0.14242838 | 0.07488204  | -0.16183875 | 0.52134446 | 0.06103376 | 0.3359      | 0.51425782  | 0.238594682 | 0.116071   |
| COF8   | NK_198189_361098_R | ACCTAAAAGGACAGCCTGGAGGACAGCATCTTCGATCTTCAGCTGGCTCCGG | HL31313 | 15412 | -0.3004875 | 0.15811008 | 0.08790941  | -0.15252625 | 0.47200885 | 0.54136743 | 0.3346      | 0.51181108  | 0.22901194  | 0.082675   |
| COF8   | NK_198189_361098_R | ACCTAAAAGGACAGCCTGGAGGACAGCATCTTCGATCTTCAGCTGGCTCCGG | HL31313 | 4662  | 0.4056265  | 0.61620904 | 0.21693136  | -0.1173775  | 0.7932595  | 0.74170958 | 0.20025     | 0.34656072  | 0.238594682 | 0.13851    |
| COF8   | NK_198189_361098_R | ACCTAAAAGGACAGCCTGGAGGACAGCATCTTCGATCTTCAGCTGGCTCCGG | HL31313 | 10038 | 0.1796025  | 0.2498643  | 0.31766997  | -0.1380735  | 0.3894837  | 0.5081959  | 0.25555     | 0.36797534  | 0.2389952   | 0.383475   |
| COF8   | NK_198189_361098_R | ACCTAAAAGGACAGCCTGGAGGACAGCATCTTCGATCTTCAGCTGGCTCCGG | HL31313 | 15414 | -0.0786785 | 0.1873232  | 0.17217064  | 0.15118667  | 0.2693540  | 0.53083863 | 0.02005     | 0.37615516  | 0.26825814  | 0.387675   |
| COF8   | NK_198189_361098_R | ACCTAAAAGGACAGCCTGGAGGACAGCATCTTCGATCTTCAGCTGGCTCCGG | HL31313 | 4662  | 0.349825   | 0.3665318  | 0.3227929   |             |            |            | -0.2750262  | 0.5662095   | 0.34442591  |            |
| COF8   | NK_198189_361098_R | ACCTAAAAGGACAGCCTGGAGGACAGCATCTTCGATCTTCAGCTGGCTCCGG | HL31313 | 10038 | -0.309275  | 0.3743375  | 0.1217236   |             |            |            | -0.3130785  | 0.6083789   | 0.29911075  |            |
| COF8   | NK_198189_361098_R | ACCTAAAAGGACAGCCTGGAGGACAGCATCTTCGATCTTCAGCTGGCTCCGG | HL31313 | 15421 | -0.40346   | 0.3406011  | 0.021499675 |             |            |            | -0.4052375  | 0.29517607  | 0.09829161  |            |
| COF8   | NK_198189_361098_R | ACCTAAAAGGACAGCCTGGAGGACAGCATCTTCGATCTTCAGCTGGCTCCGG | HL31313 | 4660  | -0.2092625 | 0.11915487 | 0.18775905  | -0.5542625  | 0.61812722 | 0.1141334  | 0.317275    | 0.53705882  | 0.22993152  | 0.109825   |
| COF8   | NK_198189_361098_R | ACCTAAAAGGACAGCCTGGAGGACAGCATCTTCGATCTTCAGCTGGCTCCGG | HL31313 | 10036 | 0.4767875  | 0.14242838 | 0.07488204  | -0.16183875 | 0.52134446 | 0.06103376 | 0.3359      | 0.51425782  | 0.238594682 | 0.116071   |
| COF8   | NK_198189_361098_R | ACCTAAAAGGACAGCCTGGAGGACAGCATCTTCGATCTTCAGCTGGCTCCGG | HL31313 | 15412 | -0.3004875 | 0.15811008 | 0.08790941  | -0.15252625 | 0.47200885 | 0.54136743 | 0.3346      | 0.51181108  | 0.22901194  | 0.082675   |
| COF8   | NK_198189_361098_R | ACCTAAAAGGACAGCCTGGAGGACAGCATCTTCGATCTTCAGCTGGCTCCGG | HL31313 | 4662  | 0.4056265  | 0.61620904 | 0.21693136  | -0.1173775  | 0.7932595  | 0.74170958 | 0.20025     | 0.34656072  | 0.238594682 | 0.13851    |
| COF8   | NK_198189_361098_R | ACCTAAAAGGACAGCCTGGAGGACAGCATCTTCGATCTTCAGCTGGCTCCGG | HL31313 | 10038 | 0.1796025  | 0.2498643  | 0.31766997  | -0.1380735  | 0.3894837  | 0.5081959  | 0.25555     | 0.36797534  | 0.2389952   | 0.383475   |
| COF8   | NK_198189_361098_R | ACCTAAAAGGACAGCCTGGAGGACAGCATCTTCGATCTTCAGCTGGCTCCGG | HL31313 | 15414 | -0.0786785 | 0.1873232  | 0.17217064  | 0.15118667  | 0.2693540  | 0.53083863 | 0.02005     | 0.37615516  | 0.26825814  | 0.387675   |
| COF8   | NK_198189_361098_R | ACCTAAAAGGACAGCCTGGAGGACAGCATCTTCGATCTTCAGCTGGCTCCGG | HL31313 | 4662  | 0.349825   | 0.3665318  | 0.3227929   |             |            |            | -0.2750262  | 0.5662095   | 0.34442591  |            |
| COF8   | NK_198189_361098_R | ACCTAAAAGGACAGCCTGGAGGACAGCATCTTCGATCTTCAGCTGGCTCCGG | HL31313 | 10038 | -0.309275  | 0.3743375  | 0.1217236   |             |            |            | -0.3130785  | 0.6083789   | 0.29911075  |            |
| COF8   | NK_198189_361098_R | ACCTAAAAGGACAGCCTGGAGGACAGCATCTTCGATCTTCAGCTGGCTCCGG | HL31313 | 15421 | -0.40346   | 0.3406011  | 0.021499675 |             |            |            | -0.4052375  | 0.29517607  | 0.09829161  |            |
| COF8   | NK_198189_361098_R | ACCTAAAAGGACAGCCTGGAGGACAGCATCTTCGATCTTCAGCTGGCTCCGG | HL31313 | 4660  | -0.2092625 | 0.11915487 | 0.18775905  | -0.5542625  | 0.61812722 | 0.1141334  | 0.317275    | 0.53705882  | 0.22993152  | 0.109825   |
| COF8   | NK_198189_361098_R | ACCTAAAAGGACAGCCTGGAGGACAGCATCTTCGATCTTCAGCTGGCTCCGG | HL31313 | 10036 | 0.4767875  | 0.14242838 | 0.07488204  | -0.16183875 | 0.52134446 | 0.06103376 | 0.3359      | 0.51425782  | 0.238594682 | 0.116071   |
| COF8   | NK_198189_361098_R | ACCTAAAAGGACAGCCTGGAGGACAGCATCTTCGATCTTCAGCTGGCTCCGG | HL31313 | 15412 | -0.3004875 | 0.15811008 | 0.08790941  | -0.15252625 | 0.47200885 | 0.54136743 | 0.3346      | 0.51181108  | 0.22901194  | 0.082675   |
| COF8   | NK_198189_361098_R | ACCTAAAAGGACAGCCTGGAGGACAGCATCTTCGATCTTCAGCTGGCTCCGG | HL31313 | 4662  | 0.4056265  | 0.61620904 | 0.21693136  | -0.1173775  | 0.7932595  | 0.74170958 | 0.20025     | 0.34656072  | 0.238594682 | 0.13851    |
| COF8   | NK_198189_361098_R | ACCTAAAAGGACAGCCTGGAGGACAGCATCTTCGATCTTCAGCTGGCTCCGG | HL31313 | 10038 | 0.1796025  | 0.2498643  | 0.31766997  | -0.1380735  | 0.3894837  | 0.5081959  | 0.25555     | 0.36797534  | 0.2389952   | 0.383475   |
| COF8   | NK_198189_361098_R | ACCTAAAAGGACAGCCTGGAGGACAGCATCTTCGATCTTCAGCTGGCTCCGG | HL31313 | 15414 | -0.0786785 | 0.1873232  | 0.17217064  | 0.15118667  | 0.2693540  | 0.53083863 | 0.02005     | 0.37615516  | 0.26825814  | 0.387675   |
| COF8   | NK_198189_361098_R | ACCTAAAAGGACAGCCTGGAGGACAGCATCTTCGATCTTCAGCTGGCTCCGG | HL31313 | 4662  | 0.349825   | 0.3665318  | 0.3227929   |             |            |            | -0.2750262  | 0.5662095   | 0.34442591  |            |
| COF8   | NK_198189_361098_R | ACCTAAAAGGACAGCCTGGAGGACAGCATCTTCGATCTTCAGCTGGCTCCGG | HL31313 | 10038 | -0.309275  | 0.3743375  | 0.1217236   |             |            |            | -0.3130785  | 0.6083789   | 0.29911075  |            |
| COF8   | NK_198189_361098_R | ACCTAAAAGGACAGCCTGGAGGACAGCATCTTCGATCTTCAGCTGGCTCCGG | HL31313 | 15421 | -0.40346   | 0.3406011  | 0.021499675 |             |            |            | -0.4052375  | 0.29517607  | 0.09829161  |            |
| COF8   | NK_198189_361098_R | ACCTAAAAGGACAGCCTGGAGGACAGCATCTTCGATCTTCAGCTGGCTCCGG | HL31313 | 4660  | -0.2092625 | 0.11915487 | 0.18775905  | -0.5542625  | 0.61812722 | 0.1141334  | 0.317275    | 0.53705882  | 0.22993152  | 0.109825   |
| COF8   | NK_198189_361098_R | ACCTAAAAGGACAGCCTGGAGGACAGCATCTTCGATCTTCAGCTGGCTCCGG | HL31313 | 10036 | 0.4767875  | 0.14242838 | 0.07488204  | -0.16183875 | 0.52134446 | 0.06103376 | 0.3359      | 0.51425782  | 0.238594682 | 0.116071   |
| COF8   | NK_198189_361098_R | ACCTAAAAGGACAGCCTGGAGGACAGCATCTTCGATCTTCAGCTGGCTCCGG | HL31313 | 15412 | -0.3004875 | 0.15811008 | 0.08790941  | -0.15252625 | 0.47200885 | 0.54136743 | 0.3346      | 0.51181108  | 0.22901194  | 0.082675   |
| COF8   | NK_198189_361098_R | ACCTAAAAGGACAGCCTGGAGGACAGCATCTTCGATCTTCAGCTGGCTCCGG | HL31313 | 4662  | 0.4056265  | 0.61620904 | 0.21693136  | -0.1173775  | 0.7932595  | 0.741      |             |             |             |            |

|           |                   |                                                        |          |       |             |            |             |             |             |             |
|-----------|-------------------|--------------------------------------------------------|----------|-------|-------------|------------|-------------|-------------|-------------|-------------|
| CSMKI4L   | NM_145203_16590_R | ACCTAAAAGAGCAAACTTACAGCTTCTTCTTGAAGAAATCGTAAAGTTCCTGGG | HL512897 | 11462 | -0.096775   | 0.115884   | 0.51128081  | -0.250175   | 0.18868718  | 0.15437201  |
| CSMK4D    | NM_13962_16490_R  | ACCTAAAAGAGCAAACTTACAGCTTCTTCTTGAAGAAATCGTAAAGTTCCTGGG | HL477070 | 2179  | 0.139625    | 0.134744   | 0.00029413  | 1.12005     | 1.550793    | 0.47270024  |
| CSMK4D    | NM_13962_16490_R  | ACCTAAAAGAGCAAACTTACAGCTTCTTCTTGAAGAAATCGTAAAGTTCCTGGG | HL477070 | 7505  | 2.544235    | 0.6171347  | 0.00029413  | 1.19785     | 1.563979    | 0.13186790  |
| CSMK4D    | NM_13962_16490_R  | ACCTAAAAGAGCAAACTTACAGCTTCTTCTTGAAGAAATCGTAAAGTTCCTGGG | HL477070 | 7613  | 2.740275    | 0.5666     | 0.00029413  | 1.19785     | 1.550793    | 0.13186790  |
| CSMK4D    | NM_13962_16490_R  | ACCTAAAAGAGCAAACTTACAGCTTCTTCTTGAAGAAATCGTAAAGTTCCTGGG | HL477070 | 661   | -0.4962     | 0.2241188  | 0.04229878  | -0.3584     | 0.3780222   | 0.14446434  |
| CSMK4D    | NM_13962_16490_R  | ACCTAAAAGAGCAAACTTACAGCTTCTTCTTGAAGAAATCGTAAAGTTCCTGGG | HL477070 | 6037  | -0.57105    | 0.4601258  | 0.04937722  | -0.15685    | 0.3667060   | 0.46783811  |
| CSMK4D    | NM_13962_16490_R  | ACCTAAAAGAGCAAACTTACAGCTTCTTCTTGAAGAAATCGTAAAGTTCCTGGG | HL477070 | 11413 | 0.5646      | 0.3321376  | 0.00029413  | 0.909825    | 0.9377928   | 0.08412015  |
| CSMK4D    | NM_13962_16490_R  | ACCTAAAAGAGCAAACTTACAGCTTCTTCTTGAAGAAATCGTAAAGTTCCTGGG | HL477070 | 662   | 1.0053      | 0.4964767  | 0.00735436  | 0.326825    | 0.2051391   | 0.09236633  |
| CSMK4D    | NM_13962_16490_R  | ACCTAAAAGAGCAAACTTACAGCTTCTTCTTGAAGAAATCGTAAAGTTCCTGGG | HL477070 | 6038  | 1.203425    | 0.5702445  | 0.00029413  | 0.909825    | 0.9377928   | 0.08412015  |
| CSMK4E    | NM_15221_16520_R  | ACCTAAAAGAGCAAACTTACAGCTTCTTCTTGAAGAAATCGTAAAGTTCCTGGG | HL477070 | 11414 | 1.0053      | 0.4964767  | 0.00735436  | 0.326825    | 0.2051391   | 0.09236633  |
| CSMK4E    | NM_15221_16520_R  | ACCTAAAAGAGCAAACTTACAGCTTCTTCTTGAAGAAATCGTAAAGTTCCTGGG | HL478313 | 6038  | 1.203425    | 0.5702445  | 0.00029413  | 0.909825    | 0.9377928   | 0.08412015  |
| CSMK4E    | NM_15221_16520_R  | ACCTAAAAGAGCAAACTTACAGCTTCTTCTTGAAGAAATCGTAAAGTTCCTGGG | HL478313 | 6041  | -0.06445    | 0.1827817  | 0.0199344   | 0.015255    | 0.3724978   | 0.09236214  |
| CSMK4E    | NM_15221_16520_R  | ACCTAAAAGAGCAAACTTACAGCTTCTTCTTGAAGAAATCGTAAAGTTCCTGGG | HL478313 | 1467  | 0.621075    | 0.2062425  | 0.00940898  | 0.1164      | 0.3106472   | 0.42314496  |
| CSMK4E    | NM_15221_16520_R  | ACCTAAAAGAGCAAACTTACAGCTTCTTCTTGAAGAAATCGTAAAGTTCCTGGG | HL478313 | 714   | 0.964075    | 0.4437749  | 0.00717281  | 0.1245      | 0.2060434   | 0.47270024  |
| CSMK4E    | NM_15221_16520_R  | ACCTAAAAGAGCAAACTTACAGCTTCTTCTTGAAGAAATCGTAAAGTTCCTGGG | HL478313 | 6092  | -0.8009     | 0.415794   | 0.01153317  | 0.00245     | 0.2971992   | 0.0818888   |
| CSMK4E    | NM_15221_16520_R  | ACCTAAAAGAGCAAACTTACAGCTTCTTCTTGAAGAAATCGTAAAGTTCCTGGG | HL478313 | 11468 | 0.3296      | 0.2844568  | 0.01798918  | 0.240205    | 0.2643961   | 0.265605031 |
| CSMK4G1   | NM_022048_16369_R | ACCTAAAAGAGCAAACTTACAGCTTCTTCTTGAAGAAATCGTAAAGTTCCTGGG | HL254335 | 679   | -0.546025   | 0.1499137  | 0.01275108  | -0.373      | 0.8998839   | 0.4013617   |
| CSMK4G1   | NM_022048_16369_R | ACCTAAAAGAGCAAACTTACAGCTTCTTCTTGAAGAAATCGTAAAGTTCCTGGG | HL254335 | 12658 | 1.0704      | 0.9047126  | 0.00597169  | -0.07626    | 0.4737634   | 0.75354442  |
| CSMK4G1   | NM_022048_16369_R | ACCTAAAAGAGCAAACTTACAGCTTCTTCTTGAAGAAATCGTAAAGTTCCTGGG | HL254335 | 11431 | -0.254625   | 0.3214549  | 0.01465692  | -0.218929   | 0.7310194   | 0.53387934  |
| CSMK4G1   | NM_022048_16369_R | ACCTAAAAGAGCAAACTTACAGCTTCTTCTTGAAGAAATCGTAAAGTTCCTGGG | HL254335 | 12658 | 1.0704      | 0.9047126  | 0.00597169  | -0.07626    | 0.4737634   | 0.75354442  |
| CSMK4G1   | NM_022048_16369_R | ACCTAAAAGAGCAAACTTACAGCTTCTTCTTGAAGAAATCGTAAAGTTCCTGGG | HL254335 | 1904  | 0.866275    | 0.1722988  | 0.03737703  | -0.4156667  | 0.2137964   | 0.20799844  |
| CSMK4G1   | NM_022048_16369_R | ACCTAAAAGAGCAAACTTACAGCTTCTTCTTGAAGAAATCGTAAAGTTCCTGGG | HL254335 | 7280  | -0.4872     | 0.5537383  | 0.1478951   | -0.3735667  | 0.1514868   | 0.11076717  |
| CSMK4G1   | NM_022048_16369_R | ACCTAAAAGAGCAAACTTACAGCTTCTTCTTGAAGAAATCGTAAAGTTCCTGGG | HL254335 | 1906  | 0.866275    | 0.1722988  | 0.03737703  | -0.4156667  | 0.2137964   | 0.20799844  |
| CSMK4G1   | NM_022048_16369_R | ACCTAAAAGAGCAAACTTACAGCTTCTTCTTGAAGAAATCGTAAAGTTCCTGGG | HL254335 | 7282  | 1.065875    | 0.6125988  | 0.01079791  | -0.189775   | 0.4515091   | 0.44159202  |
| CSMK4G1   | NM_022048_16369_R | ACCTAAAAGAGCAAACTTACAGCTTCTTCTTGAAGAAATCGTAAAGTTCCTGGG | HL254335 | 12658 | 1.0704      | 0.9047126  | 0.00597169  | -0.07626    | 0.4737634   | 0.75354442  |
| CSMK4G2   | NM_001319_16317_R | ACCTAAAAGAGCAAACTTACAGCTTCTTCTTGAAGAAATCGTAAAGTTCCTGGG | HL181390 | 38    | 1.6005      | 0.4931367  | 0.01388112  | 0.09428333  | 1.0915265   | 0.86213682  |
| CSMK4G2   | NM_001319_16317_R | ACCTAAAAGAGCAAACTTACAGCTTCTTCTTGAAGAAATCGTAAAGTTCCTGGG | HL181390 | 2414  | 1.5992      | 0.4604367  | 0.01007391  | 0.23368325  | 1.1149758   | 1.5573474   |
| CSMK4G2   | NM_001319_16317_R | ACCTAAAAGAGCAAACTTACAGCTTCTTCTTGAAGAAATCGTAAAGTTCCTGGG | HL181390 | 10790 | 1.39733333  | 0.1808567  | 0.00153957  | 0.08798333  | 1.129385    | 0.87523759  |
| CSMK4G2   | NM_001319_16317_R | ACCTAAAAGAGCAAACTTACAGCTTCTTCTTGAAGAAATCGTAAAGTTCCTGGG | HL181390 | 1995  | 1.1879      | 0.71877    | 0.0159125   | 0.311268    | 1.00115448  | 0.00067318  |
| CSMK4G2   | NM_001319_16317_R | ACCTAAAAGAGCAAACTTACAGCTTCTTCTTGAAGAAATCGTAAAGTTCCTGGG | HL181390 | 6971  | 1.1467      | 0.86825    | 0.0482284   | 0.1948125   | 0.4822365   | 0.00069698  |
| CSMK4G2   | NM_001319_16317_R | ACCTAAAAGAGCAAACTTACAGCTTCTTCTTGAAGAAATCGTAAAGTTCCTGGG | HL181390 | 39    | 0.0007      | 0.2315857  | 0.002041323 | 1.071625    | 0.4841275   | 0.00067318  |
| CSMK4G2   | NM_001319_16317_R | ACCTAAAAGAGCAAACTTACAGCTTCTTCTTGAAGAAATCGTAAAGTTCCTGGG | HL181390 | 5415  | 0.94215     | 0.2718345  | 0.00228137  | 0.209725    | 0.2320813   | 0.2513467   |
| CSMK4G2   | NM_001319_16317_R | ACCTAAAAGAGCAAACTTACAGCTTCTTCTTGAAGAAATCGTAAAGTTCCTGGG | HL181390 | 10791 | 0.932525    | 0.2405706  | 0.00158015  | 0.181715    | 0.2302341   | 0.31239303  |
| CSMK4G2   | NM_001319_16317_R | ACCTAAAAGAGCAAACTTACAGCTTCTTCTTGAAGAAATCGTAAAGTTCCTGGG | HL129206 | 1784  | -3.4644     | -4.502308  | 0.08942506  | -5.69416667 | 1.757213    | 0.001168756 |
| CSMK4G2   | NM_001319_16317_R | ACCTAAAAGAGCAAACTTACAGCTTCTTCTTGAAGAAATCGTAAAGTTCCTGGG | HL129206 | 7140  | 0.80675     | 0.7450715  | 0.04473733  | 1.0441377   | 0.001168756 | 0.001168756 |
| CSMK4G2   | NM_001319_16317_R | ACCTAAAAGAGCAAACTTACAGCTTCTTCTTGAAGAAATCGTAAAGTTCCTGGG | HL129206 | 12536 | -3.12035    | -4.1894028 | 0.10506604  | -6.29133333 | 1.11504012  | 0.000424289 |
| CSMK4G2   | NM_001319_16317_R | ACCTAAAAGAGCAAACTTACAGCTTCTTCTTGAAGAAATCGTAAAGTTCCTGGG | HL129206 | 260   | -0.070725   | 0.1996288  | 0.07580352  | -0.4992     | 1.5034007   | 0.00748996  |
| CSMK4G2   | NM_001319_16317_R | ACCTAAAAGAGCAAACTTACAGCTTCTTCTTGAAGAAATCGTAAAGTTCCTGGG | HL129206 | 5618  | 0.2017285   | 0.2399168  | 0.04473733  | 0.1041377   | 0.001168756 | 0.001168756 |
| CSMK4G2   | NM_001319_16317_R | ACCTAAAAGAGCAAACTTACAGCTTCTTCTTGAAGAAATCGTAAAGTTCCTGGG | HL129206 | 11012 | -0.6137     | -1.4099585 | 0.31293332  | -4.07760667 | 2.65825359  | 0.70778237  |
| CSMK4G2   | NM_001319_16317_R | ACCTAAAAGAGCAAACTTACAGCTTCTTCTTGAAGAAATCGTAAAGTTCCTGGG | HL129206 | 1786  | 1.2026      | 1.2328     |             |             |             |             |
| CSMK4G2   | NM_001319_16317_R | ACCTAAAAGAGCAAACTTACAGCTTCTTCTTGAAGAAATCGTAAAGTTCCTGGG | HL129206 | 1162  | -8.12915    |            |             |             |             |             |
| CSMK4G3   | NM_004384_16418_R | ACCTAAAAGAGCAAACTTACAGCTTCTTCTTGAAGAAATCGTAAAGTTCCTGGG | HL446484 | 12538 | 0.083885    | 2.86162140 | 0.012358717 | -6.3412     |             |             |
| CSMK4G3   | NM_004384_16418_R | ACCTAAAAGAGCAAACTTACAGCTTCTTCTTGAAGAAATCGTAAAGTTCCTGGG | HL446484 | 766   | -0.84925    | 0.1942703  | 0.00105337  | -0.828075   | 0.2403787   | 0.0050401   |
| CSMK4G3   | NM_004384_16418_R | ACCTAAAAGAGCAAACTTACAGCTTCTTCTTGAAGAAATCGTAAAGTTCCTGGG | HL446484 | 10142 | 0.14422     | 0.1939589  | 0.01420181  | -0.646225   | 1.770828    | 0.00020257  |
| CSMK4G3   | NM_004384_16418_R | ACCTAAAAGAGCAAACTTACAGCTTCTTCTTGAAGAAATCGTAAAGTTCCTGGG | HL446484 | 11518 | -0.484175   | 0.1505251  | 0.01290337  | -0.5475     | 0.0829162   | 0.011887763 |
| CSMK4G3   | NM_004384_16418_R | ACCTAAAAGAGCAAACTTACAGCTTCTTCTTGAAGAAATCGTAAAGTTCCTGGG | HL446484 | 1924  | 3.586125    | 0.1345738  | 0.00035837  | 0.170795    | 0.5892988   | 0.34312763  |
| CSMK4G3   | NM_004384_16418_R | ACCTAAAAGAGCAAACTTACAGCTTCTTCTTGAAGAAATCGTAAAGTTCCTGGG | HL446484 | 7200  | 0.342125    | 0.708478   | 0.00035837  | 0.4         | 0.3876002   | 0.11387813  |
| CSMK4G3   | NM_004384_16418_R | ACCTAAAAGAGCAAACTTACAGCTTCTTCTTGAAGAAATCGTAAAGTTCCTGGG | HL446484 | 12676 | 3.915875    | 0.9272746  | 0.000147658 | 0.31225     | 0.3901264   | 0.19466538  |
| CSMK4G3   | NM_004384_16418_R | ACCTAAAAGAGCAAACTTACAGCTTCTTCTTGAAGAAATCGTAAAGTTCCTGGG | HL446484 | 6143  | 0.006       |            |             |             |             |             |
| CSMK4G3   | NM_004384_16418_R | ACCTAAAAGAGCAAACTTACAGCTTCTTCTTGAAGAAATCGTAAAGTTCCTGGG | HL446484 | 11519 | -0.40883133 | 0.1614581  | 0.08969058  | -0.39395    | 0.2277909   | 0.25142061  |
| CSMK4G3   | NM_004384_16418_R | ACCTAAAAGAGCAAACTTACAGCTTCTTCTTGAAGAAATCGTAAAGTTCCTGGG | HL446484 | 1181  | 0.22018     | 0.5655     | 0.000147658 | -0.379425   | 1.768086    | 0.05520508  |
| CSMK4G3   | NM_004384_16418_R | ACCTAAAAGAGCAAACTTACAGCTTCTTCTTGAAGAAATCGTAAAGTTCCTGGG | HL446484 | 11518 | -0.484175   | 0.1505251  | 0.01290337  | -0.5475     | 0.0829162   | 0.011887763 |
| CSMK4G3   | NM_004384_16418_R | ACCTAAAAGAGCAAACTTACAGCTTCTTCTTGAAGAAATCGTAAAGTTCCTGGG | HL446484 | 1924  | 3.586125    | 0.1345738  | 0.00035837  | 0.170795    | 0.5892988   | 0.34312763  |
| CSMK4G3   | NM_004384_16418_R | ACCTAAAAGAGCAAACTTACAGCTTCTTCTTGAAGAAATCGTAAAGTTCCTGGG | HL446484 | 7200  | 0.342125    | 0.708478   | 0.00035837  | 0.4         | 0.3876002   | 0.11387813  |
| CSMK4G3   | NM_004384_16418_R | ACCTAAAAGAGCAAACTTACAGCTTCTTCTTGAAGAAATCGTAAAGTTCCTGGG | HL446484 | 12676 | 3.915875    | 0.9272746  | 0.000147658 | 0.31225     | 0.3901264   | 0.19466538  |
| CSMK4G3   | NM_004384_16418_R | ACCTAAAAGAGCAAACTTACAGCTTCTTCTTGAAGAAATCGTAAAGTTCCTGGG | HL446484 | 6143  | 0.006       |            |             |             |             |             |
| CSMK4G3   | NM_004384_16418_R | ACCTAAAAGAGCAAACTTACAGCTTCTTCTTGAAGAAATCGTAAAGTTCCTGGG | HL446484 | 11519 | -0.40883133 | 0.1614581  | 0.08969058  | -0.39395    | 0.2277909   | 0.25142061  |
| CSMK4G3   | NM_004384_16418_R | ACCTAAAAGAGCAAACTTACAGCTTCTTCTTGAAGAAATCGTAAAGTTCCTGGG | HL446484 | 1181  | 0.22018     | 0.5655     | 0.000147658 | -0.379425   | 1.768086    | 0.05520508  |
| CSMK4G3   | NM_004384_16418_R | ACCTAAAAGAGCAAACTTACAGCTTCTTCTTGAAGAAATCGTAAAGTTCCTGGG | HL446484 | 11518 | -0.484175   | 0.1505251  | 0.01290337  | -0.5475     | 0.0829162   | 0.011887763 |
| CSMK4G3   | NM_004384_16418_R | ACCTAAAAGAGCAAACTTACAGCTTCTTCTTGAAGAAATCGTAAAGTTCCTGGG | HL446484 | 1924  | 3.586125    | 0.1345738  | 0.00035837  | 0.170795    | 0.5892988   | 0.34312763  |
| CSMK4G3   | NM_004384_16418_R | ACCTAAAAGAGCAAACTTACAGCTTCTTCTTGAAGAAATCGTAAAGTTCCTGGG | HL446484 | 7200  | 0.342125    | 0.708478   | 0.00035837  | 0.4         | 0.3876002   | 0.11387813  |
| CSMK4G3   | NM_004384_16418_R | ACCTAAAAGAGCAAACTTACAGCTTCTTCTTGAAGAAATCGTAAAGTTCCTGGG | HL446484 | 12676 | 3.915875    | 0.9272746  | 0.000147658 | 0.31225     | 0.3901264   | 0.19466538  |
| CSMK4G3   | NM_004384_16418_R | ACCTAAAAGAGCAAACTTACAGCTTCTTCTTGAAGAAATCGTAAAGTTCCTGGG | HL446484 | 6143  | 0.006       |            |             |             |             |             |
| CSMK4G3   | NM_004384_16418_R | ACCTAAAAGAGCAAACTTACAGCTTCTTCTTGAAGAAATCGTAAAGTTCCTGGG | HL446484 | 11519 | -0.40883133 | 0.1614581  | 0.08969058  | -0.39395    | 0.2277909   | 0.25142061  |
| CSMK4G3   | NM_004384_16418_R | ACCTAAAAGAGCAAACTTACAGCTTCTTCTTGAAGAAATCGTAAAGTTCCTGGG | HL446484 | 1181  | 0.22018     | 0.5655     | 0.000147658 | -0.379425   | 1.768086    | 0.05520508  |
| CSMK4G3   | NM_004384_16418_R | ACCTAAAAGAGCAAACTTACAGCTTCTTCTTGAAGAAATCGTAAAGTTCCTGGG | HL446484 | 11518 | -0.484175   | 0.1505251  | 0.01290337  | -0.5475     | 0.0829162   | 0.011887763 |
| CSMK4G3   | NM_004384_16418_R | ACCTAAAAGAGCAAACTTACAGCTTCTTCTTGAAGAAATCGTAAAGTTCCTGGG | HL446484 | 1924  | 3.586125    | 0.1345738  | 0.00035837  | 0.170795    | 0.5892988   | 0.34312763  |
| CSMK4G3   | NM_004384_16418_R | ACCTAAAAGAGCAAACTTACAGCTTCTTCTTGAAGAAATCGTAAAGTTCCTGGG | HL446484 | 7200  | 0.342125    | 0.708478   | 0.00035837  | 0.4         | 0.3876002   | 0.11387813  |
| CSMK4G3   | NM_004384_16418_R | ACCTAAAAGAGCAAACTTACAGCTTCTTCTTGAAGAAATCGTAAAGTTCCTGGG | HL446484 | 12676 | 3.915875    | 0.9272746  | 0.000147658 | 0.31225     | 0.3901264   | 0.19466538  |
| CSMK4G3   | NM_004384_16418_R | ACCTAAAAGAGCAAACTTACAGCTTCTTCTTGAAGAAATCGTAAAGTTCCTGGG | HL446484 | 6143  | 0.006       |            |             |             |             |             |
| CSMK4G3   | NM_004384_16418_R | ACCTAAAAGAGCAAACTTACAGCTTCTTCTTGAAGAAATCGTAAAGTTCCTGGG | HL446484 | 11519 | -0.40883133 | 0.1614581  | 0.08969058  | -0.39395    | 0.2277909   | 0.25142061  |
| CSMK4G3   | NM_004384_16418_R | ACCTAAAAGAGCAAACTTACAGCTTCTTCTTGAAGAAATCGTAAAGTTCCTGGG | HL446484 | 1181  | 0.22018     | 0.5655     | 0.000147658 | -0.379425   | 1.768086    | 0.05520508  |
| CSMK4G3   | NM_004384_16418_R | ACCTAAAAGAGCAAACTTACAGCTTCTTCTTGAAGAAATCGTAAAGTTCCTGGG | HL446484 | 11518 | -0.484175   | 0.1505251  | 0.01290337  | -0.5475     | 0.0829162   | 0.011887763 |
| CSMK4G3</ |                   |                                                        |          |       |             |            |             |             |             |             |

|         |                    |                                                          |          |       |            |             |             |             |             |             |
|---------|--------------------|----------------------------------------------------------|----------|-------|------------|-------------|-------------|-------------|-------------|-------------|
| CXCR4   | NM_003467_36973_R  | ACCTAAAAGGTTGGTGTTCCTGATTCATCTCTTGAAGATAGGACCAACCCAGCG   | HL402866 | 7839  | 1.0388125  | 0.31770662  | 0.002479843 | 0.17055     | 0.7600451   | 0.606899175 |
| CXCR4   | NM_003467_36973_R  | ACCTAAAAGGTTGGTGTTCCTGATTCATCTCTTGAAGATAGGACCAACCCAGCG   | HL402866 | 1227  | 0.15765    | 0.7212079   | 0.000000000 | 0.15765     | 0.7212079   | 0.000000000 |
| CXCR4   | NM_003467_36973_R  | ACCTAAAAGGTTGGTGTTCCTGATTCATCTCTTGAAGATAGGACCAACCCAGCG   | HL402866 | 2465  | 0.0064879  | 0.37394888  | 0.871474234 | 0.3311      | 0.3194371   | 0.172505767 |
| CXCR4   | NM_003467_36973_R  | ACCTAAAAGGTTGGTGTTCCTGATTCATCTCTTGAAGATAGGACCAACCCAGCG   | HL402866 | 2611  | 0.1011725  | 0.30369511  | 0.774888891 | 0.3104679   | 0.2684179   | 0.000000000 |
| CXCR4   | NM_003467_36973_R  | ACCTAAAAGGTTGGTGTTCCTGATTCATCTCTTGAAGATAGGACCAACCCAGCG   | HL402866 | 2617  | 0.1011725  | 0.30369511  | 0.774888891 | 0.197975    | 0.4251526   | 0.4885472   |
| CXCR5   | NM_016463_361702_R | ACCTAAAAGGCCCCCTTGTGAGCAAACTCTTGATTTGGTTCGAAAGCGGTGGCG   | HL189119 | 1267  | 1.56765    | 0.527444    | 0.00127946  | 0.0020      | 0.2787954   | 0.924675199 |
| CXCR5   | NM_016463_361702_R | ACCTAAAAGGCCCCCTTGTGAGCAAACTCTTGATTTGGTTCGAAAGCGGTGGCG   | HL189119 | 8343  | 1.48995    | 0.4274834   | 0.0021962   | 0.11085     | 0.7588116   | 0.738900112 |
| CXCR5   | NM_016463_361702_R | ACCTAAAAGGCCCCCTTGTGAGCAAACTCTTGATTTGGTTCGAAAGCGGTGGCG   | HL189119 | 13719 | 1.24135    | 0.2269453   | 0.00000233  | 0.03205     | 0.9191602   | 0.972975705 |
| CXCR5   | NM_016463_361702_R | ACCTAAAAGGCCCCCTTGTGAGCAAACTCTTGATTTGGTTCGAAAGCGGTGGCG   | HL189119 | 2973  | 0.0026443  | 0.4502893   | 0.000000000 | 0.041866667 | 1.5100911   | 0.96448992  |
| CXCR5   | NM_016463_361893_R | ACCTAAAAGGCAAGAAGTGAACCACTTCATCTTGATTTGGTTCGAAAGCGGTGGCG | HL189119 | 8347  | 0.851225   | 0.59811721  | 0.02381332  | 0.143246667 | 1.770244677 | 0.841277477 |
| CXCR5   | NM_016463_361893_R | ACCTAAAAGGCAAGAAGTGAACCACTTCATCTTGATTTGGTTCGAAAGCGGTGGCG | HL189119 | 12723 | 0.89129    | 0.4201885   | 0.000000000 | 0.221256667 | 1.7924564   | 0.760045175 |
| CXCR5   | NM_016463_362031_R | ACCTAAAAGGCCCCCTTGTGAGCAAACTCTTGATTTGGTTCGAAAGCGGTGGCG   | HL189119 | 2069  | 1.801075   | 0.29249060  | 0.00133747  | 0.447175    | 0.5653194   | 0.145664662 |
| CXCR5   | NM_016463_362031_R | ACCTAAAAGGCCCCCTTGTGAGCAAACTCTTGATTTGGTTCGAAAGCGGTGGCG   | HL189119 | 8345  | 1.7426     | 0.246107    | 0.00018845  | 0.449070    | 0.2169617   | 0.5243105   |
| CXCR5   | NM_016463_362031_R | ACCTAAAAGGCCCCCTTGTGAGCAAACTCTTGATTTGGTTCGAAAGCGGTGGCG   | HL189119 | 13721 | 1.813275   | 0.33609677  | 0.00002790  | 0.46279     | 0.3207497   | 0.124207247 |
| CXCR6   | NM_030623_364617_R | ACCTAAAAGGCAACATGATGATTAATCTTGATTTGGTTCGAAAGCGGTGGCG     | HL567994 | 3659  | 0.8604     | 0.7486184   | 0.04194857  | 0.3047      | 0.41378043  | 0.313311394 |
| CXCR6   | NM_030623_364617_R | ACCTAAAAGGCAACATGATGATTAATCTTGATTTGGTTCGAAAGCGGTGGCG     | HL567994 | 14411 | 0.3866     | 0.30689181  | 0.02009390  | -0.26966461 | 0.3646766   | 0.346878004 |
| CXCR6   | NM_030623_364617_R | ACCTAAAAGGCAACATGATGATTAATCTTGATTTGGTTCGAAAGCGGTGGCG     | HL567994 | 9035  | 0.62375    | 0.34216011  | 0.01685708  | 0.4335      | 0.35658682  | 0.03245952  |
| CXCR6   | NM_030623_364617_R | ACCTAAAAGGCAACATGATGATTAATCTTGATTTGGTTCGAAAGCGGTGGCG     | HL414382 | 9235  | 0.0447     |             |             | 0.662925    | 0.3647472   | 0.023574441 |
| CXCR6   | NM_030623_364617_R | ACCTAAAAGGCAACATGATGATTAATCTTGATTTGGTTCGAAAGCGGTGGCG     | HL414382 | 14601 | 0.5999     | 0.2037296   | 0.80898483  | 0.58293     | 0.18369718  | 0.032872446 |
| CXCR6   | NM_030623_364617_R | ACCTAAAAGGCAACATGATGATTAATCTTGATTTGGTTCGAAAGCGGTGGCG     | HL414382 | 3851  | 0.3535375  | 0.74484804  | 0.33655801  | 0.466275    | 0.1103375   | 0.05432087  |
| CXCR6   | NM_030623_364617_R | ACCTAAAAGGCAACATGATGATTAATCTTGATTTGGTTCGAAAGCGGTGGCG     | HL414382 | 9227  | 0.1530275  | 0.5881357   | 0.6255827   | 0.4059      | 0.1072396   | 0.03946726  |
| CXCR6   | NM_030623_364617_R | ACCTAAAAGGCAACATGATGATTAATCTTGATTTGGTTCGAAAGCGGTGGCG     | HL414382 | 14603 | 0.4303026  | 0.8093939   | 0.27719925  | 0.38478     | 0.11416171  | 0.09481267  |
| CXCR6   | NM_030623_364617_R | ACCTAAAAGGCAACATGATGATTAATCTTGATTTGGTTCGAAAGCGGTGGCG     | HL414382 | 3847  | 0.5893785  | 0.2777889   | 0.01746832  | -0.3899     | 0.1452293   | 0.01259493  |
| CXCR6   | NM_030623_364617_R | ACCTAAAAGGCAACATGATGATTAATCTTGATTTGGTTCGAAAGCGGTGGCG     | HL414382 | 9223  | -0.5963126 | 0.2988538   | 0.01837915  | 0.41425     | 0.2133076   | 0.07726204  |
| CXCR6   | NM_030623_364617_R | ACCTAAAAGGCAACATGATGATTAATCTTGATTTGGTTCGAAAGCGGTGGCG     | HL414382 | 14599 | -0.3734625 | 0.5260333   | 0.18205173  | 0.251425    | 0.23287434  | 0.250955177 |
| CY1D    | NM_015247_362946_R | ACCTAAAAGGCAACATGATGATTAATCTTGATTTGGTTCGAAAGCGGTGGCG     | HL578973 | 1434  |            |             |             |             |             |             |
| CY1D    | NM_015247_362946_R | ACCTAAAAGGCAACATGATGATTAATCTTGATTTGGTTCGAAAGCGGTGGCG     | HL578973 | 6810  |            |             |             |             |             |             |
| CY1D    | NM_015247_362946_R | ACCTAAAAGGCAACATGATGATTAATCTTGATTTGGTTCGAAAGCGGTGGCG     | HL578973 | 12188 |            |             |             |             |             |             |
| CY1D    | NM_015247_362946_R | ACCTAAAAGGCAACATGATGATTAATCTTGATTTGGTTCGAAAGCGGTGGCG     | HL578973 | 2445  |            |             |             |             |             |             |
| CY1D    | NM_015247_362946_R | ACCTAAAAGGCAACATGATGATTAATCTTGATTTGGTTCGAAAGCGGTGGCG     | HL578973 | 7821  |            |             |             |             |             |             |
| CY1D    | NM_015247_362946_R | ACCTAAAAGGCAACATGATGATTAATCTTGATTTGGTTCGAAAGCGGTGGCG     | HL578973 | 31197 |            |             |             |             |             |             |
| CY12    | NM_003388_361788_R | ACCTAAAAGGCTCCGAGTTCGGGCAAACTCTTGATTTGGTTCGAAAGCGGTGGCG  | HL525664 | 3149  | -0.962025  | 0.16044317  | 0.00110165  | -0.5823     | 0.4077284   | 0.04818824  |
| CY12    | NM_003388_361788_R | ACCTAAAAGGCTCCGAGTTCGGGCAAACTCTTGATTTGGTTCGAAAGCGGTGGCG  | HL525664 | 8525  | 0.46485    | 0.14081318  | 0.00188995  | 0.164267    | 0.8991718   | 0.00003012  |
| CY12    | NM_003388_361788_R | ACCTAAAAGGCTCCGAGTTCGGGCAAACTCTTGATTTGGTTCGAAAGCGGTGGCG  | HL525664 | 13901 | -1.09395   | 0.21671441  | 0.00084162  | -0.4292     | 0.64418287  | 0.187169234 |
| CY12    | NM_003388_361788_R | ACCTAAAAGGCTCCGAGTTCGGGCAAACTCTTGATTTGGTTCGAAAGCGGTGGCG  | HL525664 | 2161  | 0.14122    | 0.3302216   | 0.000000000 | 0.14755     | 0.3306469   | 0.2912567   |
| CY12    | NM_003388_362033_R | ACCTAAAAGGCTCCGAGTTCGGGCAAACTCTTGATTTGGTTCGAAAGCGGTGGCG  | HL525664 | 8527  | -0.96425   | 0.12532133  | 0.00051483  | -0.224      | 0.3348629   | 0.1307486   |
| CY12    | NM_003388_362033_R | ACCTAAAAGGCTCCGAGTTCGGGCAAACTCTTGATTTGGTTCGAAAGCGGTGGCG  | HL525664 | 13903 | -0.992615  | 0.13843531  | 0.003181956 | -0.126      | 0.1349734   | 0.3462908   |
| CY12    | NM_003388_362033_R | ACCTAAAAGGCTCCGAGTTCGGGCAAACTCTTGATTTGGTTCGAAAGCGGTGGCG  | HL525664 | 3113  | 0.51145    | 0.1834834   | 0.016099425 | 0.16422     | 0.3306469   | 0.55291411  |
| CY12    | NM_003388_362033_R | ACCTAAAAGGCTCCGAGTTCGGGCAAACTCTTGATTTGGTTCGAAAGCGGTGGCG  | HL525664 | 8529  | -0.40475   | 0.48477788  | 0.451221746 | 0.27675     | 0.9307701   | 0.486313    |
| CY12    | NM_003388_362033_R | ACCTAAAAGGCTCCGAGTTCGGGCAAACTCTTGATTTGGTTCGAAAGCGGTGGCG  | HL525664 | 13905 | 0.091125   | 0.4417943   | 0.688251525 | 0.19737     | 0.0632626   | 0.01505402  |
| DE4234E | BC03427_362482_R   | ACCTAAAAGGCTCCGAGTTCGGGCAAACTCTTGATTTGGTTCGAAAGCGGTGGCG  | HL518995 | 4573  | -0.27775   | 0.76282793  | 0.197832007 | 0.66833     | 0.77986136  | 0.115730060 |
| DE4234E | BC03427_362482_R   | ACCTAAAAGGCTCCGAGTTCGGGCAAACTCTTGATTTGGTTCGAAAGCGGTGGCG  | HL518995 | 9949  | 0.001125   | 0.488251525 | 0.000000000 | 0.024166667 | 0.9493893   | 0.18934953  |
| DE4234E | BC03427_362482_R   | ACCTAAAAGGCTCCGAGTTCGGGCAAACTCTTGATTTGGTTCGAAAGCGGTGGCG  | HL518995 | 15325 | -0.21173   | 0.6464964   | 0.46839805  | 0.94775     | 0.57746847  | 0.35287727  |
| DE4234E | BC03427_362482_R   | ACCTAAAAGGCTCCGAGTTCGGGCAAACTCTTGATTTGGTTCGAAAGCGGTGGCG  | HL518995 | 4579  | 0.77715    | 0.612011    | 0.03776627  | 0.1467333   | 0.5272911   | 0.88384337  |
| DE4234E | BC03427_362482_R   | ACCTAAAAGGCTCCGAGTTCGGGCAAACTCTTGATTTGGTTCGAAAGCGGTGGCG  | HL518995 | 9951  | 0.51123    | 0.8852824   | 0.58589191  | 0.30261     | 0.50731768  | 0.235911023 |
| DE4234E | BC03427_362482_R   | ACCTAAAAGGCTCCGAGTTCGGGCAAACTCTTGATTTGGTTCGAAAGCGGTGGCG  | HL518995 | 15327 | -0.1225    | 0.83098781  | 0.78189995  | 0.4005      | 0.5804464   | 0.41130817  |
| DE4234E | BC03427_362482_R   | ACCTAAAAGGCTCCGAGTTCGGGCAAACTCTTGATTTGGTTCGAAAGCGGTGGCG  | HL518995 | 4577  | 1.39272    | 0.96880623  | 0.000000000 | 0.19737     | 0.38827288  | 0.004802976 |
| DE4234E | BC03427_362482_R   | ACCTAAAAGGCTCCGAGTTCGGGCAAACTCTTGATTTGGTTCGAAAGCGGTGGCG  | HL518995 | 9953  | 1.38255    | 0.10427793  | 0.040076292 | 2.1216      | 0.81693936  | 0.00772129  |
| DE4234E | BC03427_362482_R   | ACCTAAAAGGCTCCGAGTTCGGGCAAACTCTTGATTTGGTTCGAAAGCGGTGGCG  | HL518995 | 15329 | 0.96275    | 0.83098781  | 0.300577047 | 0.001       | 0.6372446   | 0.00034715  |
| DM1     | NM_014992_361908_R | ACCTAAAAGGCTCCGAGTTCGGGCAAACTCTTGATTTGGTTCGAAAGCGGTGGCG  | HL19156  | 3292  | 0.106205   | 0.35490161  | 0.5981194   | -0.0011875  | 0.3516034   | 0.99938486  |
| DM1     | NM_014992_361908_R | ACCTAAAAGGCTCCGAGTTCGGGCAAACTCTTGATTTGGTTCGAAAGCGGTGGCG  | HL19156  | 8468  | 0.31785    | 0.5791663   | 0.000000000 | 0.182387    | 0.3265652   | 0.44236969  |
| DM1     | NM_014992_361908_R | ACCTAAAAGGCTCCGAGTTCGGGCAAACTCTTGATTTGGTTCGAAAGCGGTGGCG  | HL19156  | 14044 | 0.474525   | 0.22929556  | 0.028988374 | -0.1087     | 0.39921488  | 0.62390216  |
| DM1     | NM_014992_361908_R | ACCTAAAAGGCTCCGAGTTCGGGCAAACTCTTGATTTGGTTCGAAAGCGGTGGCG  | HL19156  | 3249  | 0.224775   | 0.2349779   | 0.03976782  | 0.338       | 0.33746658  | 0.18999181  |
| DM1     | NM_014992_361908_R | ACCTAAAAGGCTCCGAGTTCGGGCAAACTCTTGATTTGGTTCGAAAGCGGTGGCG  | HL19156  | 8670  | 0.00715    | 0.24674882  | 0.445779001 | 0.235775    | 0.3542916   | 0.44438807  |
| DM1     | NM_014992_361908_R | ACCTAAAAGGCTCCGAGTTCGGGCAAACTCTTGATTTGGTTCGAAAGCGGTGGCG  | HL19156  | 14046 | 0.19       | 0.3186454   | 0.33986625  | 0.302875    | 0.9193731   | 0.31451375  |
| DM1     | NM_014992_361908_R | ACCTAAAAGGCTCCGAGTTCGGGCAAACTCTTGATTTGGTTCGAAAGCGGTGGCG  | HL19156  | 3249  | 0.1892     | 0.3975      | 0.48008181  | 0.45427318  | 0.1495      | 0.31247115  |
| DM1     | NM_014992_361908_R | ACCTAAAAGGCTCCGAGTTCGGGCAAACTCTTGATTTGGTTCGAAAGCGGTGGCG  | HL19156  | 14042 | 0.0026     | 0.5312561   | 0.743110218 | 0.061       | 0.2147155   | 0.13720032  |
| DM1     | NM_014992_361908_R | ACCTAAAAGGCTCCGAGTTCGGGCAAACTCTTGATTTGGTTCGAAAGCGGTGGCG  | HL19156  | 3292  | -0.0015    | 0.17520032  | 0.000000000 | -0.3992625  | 0.2471866   | 0.0102108   |
| DM1     | NM_014992_361908_R | ACCTAAAAGGCTCCGAGTTCGGGCAAACTCTTGATTTGGTTCGAAAGCGGTGGCG  | HL380277 | 354   | 0.0075     | 0.95770739  | 0.96372734  | 2.1981      | 0.42689072  | 0.016013609 |
| DM1     | NM_014992_361908_R | ACCTAAAAGGCTCCGAGTTCGGGCAAACTCTTGATTTGGTTCGAAAGCGGTGGCG  | HL380277 | 8667  | 0.182387   | 0.3265652   | 0.44236969  | 0.182387    | 0.3265652   | 0.44236969  |
| DM1     | NM_014992_361908_R | ACCTAAAAGGCTCCGAGTTCGGGCAAACTCTTGATTTGGTTCGAAAGCGGTGGCG  | HL380277 | 11108 | -0.47965   | 0.76057919  | 0.19549196  | 1.121       | 0.68489151  | 0.0376215   |
| DM1     | NM_014992_361908_R | ACCTAAAAGGCTCCGAGTTCGGGCAAACTCTTGATTTGGTTCGAAAGCGGTGGCG  | HL380277 | 357   | -0.6436667 | 1.1564267   | 0.27959369  | -1.0098     | 0.35768423  | 0.55041071  |
| DM1     | NM_014992_361908_R | ACCTAAAAGGCTCCGAGTTCGGGCAAACTCTTGATTTGGTTCGAAAGCGGTGGCG  | HL380277 | 8667  | 0.224775   | 0.13008863  | 0.68516648  | 1.086       | 0.3024994   | 0.61565091  |
| DM1     | NM_014992_361908_R | ACCTAAAAGGCTCCGAGTTCGGGCAAACTCTTGATTTGGTTCGAAAGCGGTGGCG  | HL380277 | 11109 | -0.1611    | 0.14842409  | 0.78699354  | -0.3966263  | 0.18229333  | 0.08776295  |
| DM1     | NM_014992_361908_R | ACCTAAAAGGCTCCGAGTTCGGGCAAACTCTTGATTTGGTTCGAAAGCGGTGGCG  | HL380277 | 1569  | 0.96275    | 0.83098781  | 0.300577047 | 0.001       | 0.6372446   | 0.00034715  |
| DM1     | NM_014992_361908_R | ACCTAAAAGGCTCCGAGTTCGGGCAAACTCTTGATTTGGTTCGAAAGCGGTGGCG  | HL380277 | 6945  | -4.7365    |             |             | -0.3992625  | 0.2471866   | 0.0102108   |
| DM1     | NM_014992_361908_R | ACCTAAAAGGCTCCGAGTTCGGGCAAACTCTTGATTTGGTTCGAAAGCGGTGGCG  | HL380277 | 1221  |            |             |             | 0.0635      | 0.2812016   | 0.19324644  |
| DM2     | NM_014236_36496_R  | ACCTAAAAGGCTCCGAGTTCGGGCAAACTCTTGATTTGGTTCGAAAGCGGTGGCG  | HL72886  | 6986  | -1.546265  | 0.27879171  | 0.27496342  | -0.4983     | 0.5247676   | 0.83993407  |
| DM2     | NM_014236_36496_R  | ACCTAAAAGGCTCCGAGTTCGGGCAAACTCTTGATTTGGTTCGAAAGCGGTGGCG  | HL72886  | 12487 | 0.182387   | 0.3265652   | 0.44236969  | -1.119      | 0.5874937   | 0.69418678  |
| DM2     | NM_014236_36496_R  | ACCTAAAAGGCTCCGAGTTCGGGCAAACTCTTGATTTGGTTCGAAAGCGGTGGCG  | HL72886  | 1610  | -1.84525   | 0.26592843  | 0.19367422  | -0.119      | 0.5874937   | 0.69418678  |
| DM2     | NM_014236_36496_R  | ACCTAAAAGGCTCCGAGTTCGGGCAAACTCTTGATTTGGTTCGAAAGCGGTGGCG  | HL72886  | 453   | 0.049875   | 0.1464978   | 0.91818355  | 0.2488      | 0.8995252   | 0.662771887 |
| DM2     | NM_014236_36496_R  | ACCTAAAAGGCTCCGAGTTCGGGCAAACTCTTGATTTGGTTCGAAAGCGGTGGCG  | HL72886  | 882   | 0.1078     | 0.3943808   | 0.90061397  | -1.7083333  | 0.1882758   | 0.29922222  |
| DM2     | NM_014236_36496_R  | ACCTAAAAGGCTCCGAGTTCGGGCAAACTCTTGATTTGGTTCGAAAGCGGTGGCG  | HL72886  | 11205 | -0.132875  | 0.19208085  | 0.79244229  | -1.80286667 | 0.30654268  | 0.249035165 |
| DM2     | NM_014236_36496_R  | ACCTAAAAGGCTCCGAGTTCGGGCAAACTCTTGATTTGGTTCGAAAGCGGTGGCG  | HL72886  | 454   | 0.17445    | 0.19302342  | 0.68954183  | -0.4619     | 0.2404916   | 0.62032661  |



NKPF764344 WN 01.51459 361528 8 ACCTAAAAGAGGAGGAAAGCAAGAAATTCCTTGAAATATCTTGATATCTCTTCCTCCG... HL35619 8714 0.1731 0.5275133 0.1851209 1.73956 0.72290631 0.017082519 0.95845 0.59315286 0.048153072





|        |                  |                                                        |          |       |            |            |             |             |             |             |
|--------|------------------|--------------------------------------------------------|----------|-------|------------|------------|-------------|-------------|-------------|-------------|
| EF34K4 | BX49019_361033.R | ACGTAAAAGTGGCCCTGCTGGTCAATCTTGAAATTTCCGCGACAGCGGGCCAGG | HL412102 | 10899 | 0.3421     | 0.2396484  | 0.08408153  | 0.1560125   | 0.19020135  | 0.35274274  |
| EF34K4 | BX49019_361033.R | ACGTAAAAGTGGCCCTGCTGGTCAATCTTGAAATTTCCGCGACAGCGGGCCAGG | HL412102 | 10899 | 0.66592581 | 0.07524462 | 0.08606525  | 0.16749789  | 0.02002615  | 0.00000000  |
| EF34K4 | BX49019_361033.R | ACGTAAAAGTGGCCCTGCTGGTCAATCTTGAAATTTCCGCGACAGCGGGCCAGG | HL412102 | 5435  | 0.2888     | 0.21156633 | 0.37845578  | 0.0164373   | 0.10613688  | 0.00264916  |
| EF34K4 | BX49019_361033.R | ACGTAAAAGTGGCCCTGCTGGTCAATCTTGAAATTTCCGCGACAGCGGGCCAGG | HL412102 | 10899 | 0.188      | 0.2396484  | 0.08408153  | 0.1560125   | 0.19020135  | 0.35274274  |
| EF34K4 | BX49019_361033.R | ACGTAAAAGTGGCCCTGCTGGTCAATCTTGAAATTTCCGCGACAGCGGGCCAGG | HL412102 | 10899 | 1.034      | 0.368375   | 0.2801939   | 0.10681255  | 0.187225    | 0.00046754  |
| EF34K4 | BX49019_361033.R | ACGTAAAAGTGGCCCTGCTGGTCAATCTTGAAATTTCCGCGACAGCGGGCCAGG | HL412102 | 10899 | 0.6660     | 0.364925   | 0.240654    | 0.09503035  | 0.17223     | 0.00000000  |
| EF34K4 | BX49019_361033.R | ACGTAAAAGTGGCCCTGCTGGTCAATCTTGAAATTTCCGCGACAGCGGGCCAGG | HL412102 | 10899 | 1.2056     | 0.3371825  | 0.284181    | 0.1077148   | 0.132825    | 0.09319647  |
| EF34K4 | BX49019_361033.R | ACGTAAAAGTGGCCCTGCTGGTCAATCTTGAAATTTCCGCGACAGCGGGCCAGG | HL412102 | 10899 | 2369       | -1.171125  | 0.25123085  | 0.00066223  | 0.11109224  | 0.04370364  |
| EF34K4 | BX49019_361033.R | ACGTAAAAGTGGCCCTGCTGGTCAATCTTGAAATTTCCGCGACAGCGGGCCAGG | HL412102 | 10899 | 745        | 0.1109224  | 0.2294805   | 0.00070263  | 0.1537      | 0.0521943   |
| EF34K4 | BX49019_361033.R | ACGTAAAAGTGGCCCTGCTGGTCAATCTTGAAATTTCCGCGACAGCGGGCCAGG | HL412102 | 10899 | 13121      | -1.1107125 | 0.20279997  | 0.00051781  | 0.1323      | 0.00000000  |
| EF34K4 | BX49019_361033.R | ACGTAAAAGTGGCCCTGCTGGTCAATCTTGAAATTTCCGCGACAGCGGGCCAGG | HL412102 | 10899 | 1203       | 0.154225   | 0.2396484   | 0.08408153  | 0.1560125   | 0.19020135  |
| EF34K4 | BX49019_361033.R | ACGTAAAAGTGGCCCTGCTGGTCAATCTTGAAATTTCCGCGACAGCGGGCCAGG | HL412102 | 10899 | 6679       | 0.259875   | 0.17041361  | 0.19222171  | 1.11821     | 0.0564833   |
| EF34K4 | BX49019_361033.R | ACGTAAAAGTGGCCCTGCTGGTCAATCTTGAAATTTCCGCGACAGCGGGCCAGG | HL412102 | 10899 | 12053      | 0.2262125  | 0.18791064  | 0.20896379  | 1.18222     | 0.0822509   |
| EF34K4 | BX49019_361033.R | ACGTAAAAGTGGCCCTGCTGGTCAATCTTGAAATTTCCGCGACAGCGGGCCAGG | HL412102 | 10899 | 1302       | 0.2727285  | 0.2396484   | 0.08408153  | 0.1560125   | 0.19020135  |
| EF34K4 | BX49019_361033.R | ACGTAAAAGTGGCCCTGCTGGTCAATCTTGAAATTTCCGCGACAGCGGGCCAGG | HL412102 | 10899 | 6678       | 0.2893875  | 0.28303429  | 0.19729128  | -0.52175    | 0.3608308   |
| EF34K4 | BX49019_361033.R | ACGTAAAAGTGGCCCTGCTGGTCAATCTTGAAATTTCCGCGACAGCGGGCCAGG | HL412102 | 10899 | 12054      | 0.134625   | 0.2816451   | 0.16210428  | 0.3066644   | 0.06081919  |
| EF34K4 | BX49019_361033.R | ACGTAAAAGTGGCCCTGCTGGTCAATCTTGAAATTTCCGCGACAGCGGGCCAGG | HL412102 | 10899 | 2367       | 0.1659265  | 0.2491284   | 0.46139635  | -0.1689     | 0.4785641   |
| EF34K4 | BX49019_361033.R | ACGTAAAAGTGGCCCTGCTGGTCAATCTTGAAATTTCCGCGACAGCGGGCCAGG | HL412102 | 10899 | 7743       | 0.0658375  | 0.18229209  | 0.08625704  | 0.007525    | 0.4087504   |
| EF34K4 | BX49019_361033.R | ACGTAAAAGTGGCCCTGCTGGTCAATCTTGAAATTTCCGCGACAGCGGGCCAGG | HL412102 | 10899 | 13119      | -0.054962  | 0.22410369  | 0.93312041  | 0.12925     | 0.4488919   |
| EF34K4 | BX49019_361033.R | ACGTAAAAGTGGCCCTGCTGGTCAATCTTGAAATTTCCGCGACAGCGGGCCAGG | HL412102 | 10899 | 2365       | -0.144     | 0.1555635   | 0.19735893  | 0.105275    | 0.5314037   |
| EF34K4 | BX49019_361033.R | ACGTAAAAGTGGCCCTGCTGGTCAATCTTGAAATTTCCGCGACAGCGGGCCAGG | HL412102 | 10899 | 7741       | 0.2066     | 0.2396484   | 0.08408153  | 0.1560125   | 0.19020135  |
| EF34K4 | BX49019_361033.R | ACGTAAAAGTGGCCCTGCTGGTCAATCTTGAAATTTCCGCGACAGCGGGCCAGG | HL412102 | 10899 | 13117      | 0.101      | 0.2396484   | 0.08408153  | 0.1560125   | 0.19020135  |
| EF34K4 | BX49019_361033.R | ACGTAAAAGTGGCCCTGCTGGTCAATCTTGAAATTTCCGCGACAGCGGGCCAGG | HL412102 | 10899 | 1201       | -0.1898265 | 0.25785848  | 0.208410729 | -0.18705    | 0.6799575   |
| EF34K4 | BX49019_361033.R | ACGTAAAAGTGGCCCTGCTGGTCAATCTTGAAATTTCCGCGACAGCGGGCCAGG | HL412102 | 10899 | 6677       | -0.2120875 | 0.2563363   | 0.18736497  | -0.51915    | 0.2202238   |
| EF34K4 | BX49019_361033.R | ACGTAAAAGTGGCCCTGCTGGTCAATCTTGAAATTTCCGCGACAGCGGGCCAGG | HL412102 | 10899 | 12053      | -0.120125  | 0.2193021   | 0.32089322  | -0.51945    | 0.2221586   |
| EF34K4 | BX49019_361033.R | ACGTAAAAGTGGCCCTGCTGGTCAATCTTGAAATTTCCGCGACAGCGGGCCAGG | HL412102 | 10899 | 7737       | 0.0904     | 0.23902029  | 0.084436941 | 0.0865      | 0.460752    |
| EF34K4 | BX49019_361033.R | ACGTAAAAGTGGCCCTGCTGGTCAATCTTGAAATTTCCGCGACAGCGGGCCAGG | HL412102 | 10899 | 13113      | 0.0977     | 0.2396484   | 0.08408153  | 0.1560125   | 0.19020135  |
| EF34K4 | BX49019_361033.R | ACGTAAAAGTGGCCCTGCTGGTCAATCTTGAAATTTCCGCGACAGCGGGCCAGG | HL412102 | 10899 | 2361       | 0.2575     | 0.0544272   | 0.41822873  | 0.33935     | 0.3315637   |
| EF34K4 | BX49019_361033.R | ACGTAAAAGTGGCCCTGCTGGTCAATCTTGAAATTTCCGCGACAGCGGGCCAGG | HL412102 | 10899 | 1201       | 0.89375    | 0.3803473   | 0.04711892  | 0.24225     | 0.4048186   |
| EF34K4 | BX49019_361033.R | ACGTAAAAGTGGCCCTGCTGGTCAATCTTGAAATTTCCGCGACAGCGGGCCAGG | HL412102 | 10899 | 7739       | 0.981795   | 0.47370263  | 0.00529837  | 0.32862     | 0.5118521   |
| EF34K4 | BX49019_361033.R | ACGTAAAAGTGGCCCTGCTGGTCAATCTTGAAATTTCCGCGACAGCGGGCCAGG | HL412102 | 10899 | 13115      | 1.0212375  | 0.5182025   | 0.00931792  | -0.30293    | 0.44676351  |
| EF34K4 | BX49019_361033.R | ACGTAAAAGTGGCCCTGCTGGTCAATCTTGAAATTTCCGCGACAGCGGGCCAGG | HL412102 | 10899 | 1300       | -0.1413735 | 0.4918498   | 0.471432905 | 0.1021      | 0.50974663  |
| EF34K4 | BX49019_361033.R | ACGTAAAAGTGGCCCTGCTGGTCAATCTTGAAATTTCCGCGACAGCGGGCCAGG | HL412102 | 10899 | 578376     | 6676       | -0.1500875  | 0.47862379  | 0.44470568  | 0.0211      |
| EF34K4 | BX49019_361033.R | ACGTAAAAGTGGCCCTGCTGGTCAATCTTGAAATTTCCGCGACAGCGGGCCAGG | HL412102 | 10899 | 12052      | -0.1070125 | 0.4753014   | 0.5475261   | 0.009275    | 0.5130961   |
| EF34K4 | BX49019_361033.R | ACGTAAAAGTGGCCCTGCTGGTCAATCTTGAAATTTCCGCGACAGCGGGCCAGG | HL412102 | 10899 | 578376     | 2359       | 0.5128495   | 0.32280289  | 0.04575474  | 0.152       |
| EF34K4 | BX49019_361033.R | ACGTAAAAGTGGCCCTGCTGGTCAATCTTGAAATTTCCGCGACAGCGGGCCAGG | HL412102 | 10899 | 578376     | 7315       | 0.1929225   | 0.47862379  | 0.44470568  | 0.0211      |
| EF34K4 | BX49019_361033.R | ACGTAAAAGTGGCCCTGCTGGTCAATCTTGAAATTTCCGCGACAGCGGGCCAGG | HL412102 | 10899 | 578376     | 13111      | 0.740125    | 0.4627001   | 0.02303818  | 0.0771      |
| EF34K4 | BX49019_361033.R | ACGTAAAAGTGGCCCTGCTGGTCAATCTTGAAATTTCCGCGACAGCGGGCCAGG | HL412102 | 10899 | 578376     | 1299       | -0.556875   | 0.4270791   | 0.03628889  | -0.371      |
| EF34K4 | BX49019_361033.R | ACGTAAAAGTGGCCCTGCTGGTCAATCTTGAAATTTCCGCGACAGCGGGCCAGG | HL412102 | 10899 | 6679       | 0.3321875  | 0.42424284  | 0.041194178 | 0.06425     | 0.1323268   |
| EF34K4 | BX49019_361033.R | ACGTAAAAGTGGCCCTGCTGGTCAATCTTGAAATTTCCGCGACAGCGGGCCAGG | HL412102 | 10899 | 578376     | 12051      | -0.514125   | 0.3879658   | 0.03831356  | 0.06475     |
| EF34K4 | BX49019_361033.R | ACGTAAAAGTGGCCCTGCTGGTCAATCTTGAAATTTCCGCGACAGCGGGCCAGG | HL412102 | 10899 | 1117       | 0.2396484  | 0.08408153  | 0.1560125   | 0.19020135  | 0.35274274  |
| EF34K4 | BX49019_361033.R | ACGTAAAAGTGGCCCTGCTGGTCAATCTTGAAATTTCCGCGACAGCGGGCCAGG | HL412102 | 10899 | 75882      | 6493       | 1.2277625   | 0.32509131  | 0.0002486   | -0.0241875  |
| EF34K4 | BX49019_361033.R | ACGTAAAAGTGGCCCTGCTGGTCAATCTTGAAATTTCCGCGACAGCGGGCCAGG | HL412102 | 10899 | 11869      | 0.186875   | 0.2752358   | 0.00000000  | 0.009275    | 0.0912087   |
| EF34K4 | BX49019_361033.R | ACGTAAAAGTGGCCCTGCTGGTCAATCTTGAAATTTCCGCGACAGCGGGCCAGG | HL412102 | 10899 | 75882      | 2008       | -0.8928626  | 0.54197789  | 0.01504669  | -0.3998785  |
| EF34K4 | BX49019_361033.R | ACGTAAAAGTGGCCCTGCTGGTCAATCTTGAAATTTCCGCGACAGCGGGCCAGG | HL412102 | 10899 | 75882      | 7474       | -1.1188875  | 0.4270791   | 0.03628889  | -0.371      |
| EF34K4 | BX49019_361033.R | ACGTAAAAGTGGCCCTGCTGGTCAATCTTGAAATTTCCGCGACAGCGGGCCAGG | HL412102 | 10899 | 12850      | 1.184875   | 0.42034704  | 0.00208212  | 0.38228     | 0.50974663  |
| EF34K4 | BX49019_361033.R | ACGTAAAAGTGGCCCTGCTGGTCAATCTTGAAATTTCCGCGACAGCGGGCCAGG | HL412102 | 10899 | 75882      | 1118       | -0.898975   | 0.46599424  | 0.01409696  | -0.240425   |
| EF34K4 | BX49019_361033.R | ACGTAAAAGTGGCCCTGCTGGTCAATCTTGAAATTTCCGCGACAGCGGGCCAGG | HL412102 | 10899 | 6494       | 0.00539375 | 0.3009023   | 0.00718044  | 0.0083375   | 0.00718044  |
| EF34K4 | BX49019_361033.R | ACGTAAAAGTGGCCCTGCTGGTCAATCTTGAAATTTCCGCGACAGCGGGCCAGG | HL412102 | 10899 | 75882      | 1870       | -0.9187875  | 0.4728085   | 0.009271348 | -0.2914125  |
| EF34K4 | BX49019_361033.R | ACGTAAAAGTGGCCCTGCTGGTCAATCTTGAAATTTCCGCGACAGCGGGCCAGG | HL412102 | 10899 | 2438       | 0.1944925  | 0.4094025   | 0.00000000  | 0.00000000  | 0.3891828   |
| EF34K4 | BX49019_361033.R | ACGTAAAAGTGGCCCTGCTGGTCAATCTTGAAATTTCCGCGACAGCGGGCCAGG | HL412102 | 10899 | 184492     | 7814       | -0.878175   | 0.3702269   | 0.022927708 | 0.0202125   |
| EF34K4 | BX49019_361033.R | ACGTAAAAGTGGCCCTGCTGGTCAATCTTGAAATTTCCGCGACAGCGGGCCAGG | HL412102 | 10899 | 13100      | 0.186875   | 0.2752358   | 0.00000000  | 0.00000000  | 0.009275    |
| EF34K4 | BX49019_361033.R | ACGTAAAAGTGGCCCTGCTGGTCAATCTTGAAATTTCCGCGACAGCGGGCCAGG | HL412102 | 10899 | 184492     | 2438       | -0.411375   | 0.38421264  | 0.13068701  | -0.6228875  |
| EF34K4 | BX49019_361033.R | ACGTAAAAGTGGCCCTGCTGGTCAATCTTGAAATTTCCGCGACAGCGGGCCAGG | HL412102 | 10899 | 10899      | 7812       | -0.1642125  | 0.4094025   | 0.00000000  | -0.1642125  |
| EF34K4 | BX49019_361033.R | ACGTAAAAGTGGCCCTGCTGGTCAATCTTGAAATTTCCGCGACAGCGGGCCAGG | HL412102 | 10899 | 10899      | 13118      | 0.740125    | 0.4627001   | 0.02303818  | 0.0771      |
| EF34K4 | BX49019_361033.R | ACGTAAAAGTGGCCCTGCTGGTCAATCTTGAAATTTCCGCGACAGCGGGCCAGG | HL412102 | 10899 | 184492     | 2438       | -0.851775   | 0.3015939   | 0.00721043  | -0.7417875  |
| EF34K4 | BX49019_361033.R | ACGTAAAAGTGGCCCTGCTGGTCAATCTTGAAATTTCCGCGACAGCGGGCCAGG | HL412102 | 10899 | 10899      | 7810       | -0.1124     | 0.4109395   | 0.0171906   | -0.1124     |
| EF34K4 | BX49019_361033.R | ACGTAAAAGTGGCCCTGCTGGTCAATCTTGAAATTTCCGCGACAGCGGGCCAGG | HL412102 | 10899 | 184492     | 13186      | -0.65256667 | 0.4481485   | 0.08170967  | -0.3702625  |
| EF34K4 | BX49019_361033.R | ACGTAAAAGTGGCCCTGCTGGTCAATCTTGAAATTTCCGCGACAGCGGGCCAGG | HL412102 | 10899 | 6494       | 0.7679075  | 0.2996125   | 0.00000000  | 0.00000000  | 0.2996125   |
| EF34K4 | BX49019_361033.R | ACGTAAAAGTGGCCCTGCTGGTCAATCTTGAAATTTCCGCGACAGCGGGCCAGG | HL412102 | 10899 | 1616109    | 8095       | -0.666575   | 0.27034607  | 0.01166915  | -0.74125    |
| EF34K4 | BX49019_361033.R | ACGTAAAAGTGGCCCTGCTGGTCAATCTTGAAATTTCCGCGACAGCGGGCCAGG | HL412102 | 10899 | 6494       | 0.1944925  | 0.4094025   | 0.00000000  | 0.00000000  | 0.3891828   |
| EF34K4 | BX49019_361033.R | ACGTAAAAGTGGCCCTGCTGGTCAATCTTGAAATTTCCGCGACAGCGGGCCAGG | HL412102 | 10899 | 1616109    | 8095       | -0.257      | 0.2630191   | 0.04709592  | -0.0965     |
| EF34K4 | BX49019_361033.R | ACGTAAAAGTGGCCCTGCTGGTCAATCTTGAAATTTCCGCGACAGCGGGCCAGG | HL412102 | 10899 | 1616109    | 8095       | -0.32726667 | 0.4181544   | 0.49642617  | -0.19125    |
| EF34K4 | BX49019_361033.R | ACGTAAAAGTGGCCCTGCTGGTCAATCTTGAAATTTCCGCGACAGCGGGCCAGG | HL412102 | 10899 | 1616109    | 8095       | -0.268025   | 0.3795126   | 0.00000000  | -0.268025   |
| EF34K4 | BX49019_361033.R | ACGTAAAAGTGGCCCTGCTGGTCAATCTTGAAATTTCCGCGACAGCGGGCCAGG | HL412102 | 10899 | 1616109    | 8095       | -0.848425   | 0.77889189  | 0.04876015  | -0.00023333 |
| EF34K4 | BX49019_361033.R | ACGTAAAAGTGGCCCTGCTGGTCAATCTTGAAATTTCCGCGACAGCGGGCCAGG | HL412102 | 10899 | 1616109    | 8095       | -0.779225   | 0.4618072   | 0.00000000  | -0.49023333 |
| EF34K4 | BX49019_361033.R | ACGTAAAAGTGGCCCTGCTGGTCAATCTTGAAATTTCCGCGACAGCGGGCCAGG | HL412102 | 10899 | 1616109    | 8095       | -0.588125   | 0.42663981  | 0.03705957  | -0.1105     |
| EF34K4 | BX49019_361033.R | ACGTAAAAGTGGCCCTGCTGGTCAATCTTGAAATTTCCGCGACAGCGGGCCAGG | HL412102 | 10899 | 3915       | 0.919026   | 0.2610275   | 0.00000000  | 0.00000000  | 0.2610275   |
| EF34K4 | BX49019_361033.R |                                                        |          |       |            |            |             |             |             |             |



|       |                    |                                                        |          |       |            |            |            |             |            |             |
|-------|--------------------|--------------------------------------------------------|----------|-------|------------|------------|------------|-------------|------------|-------------|
| EPH42 | NM_004431_161850_R | ACCTAAAAGAGGAGGATCTTCTTCACATCTTGAAATGGAGAAAGAACTCGCCGG | HL171596 | 263   | 1.582175   | 2.493920   | 0.18448498 | -0.01403333 | 1.60230824 | 0.98550167  |
| EPH42 | NM_004431_161850_R | ACCTAAAAGAGGAGGATCTTCTTCACATCTTGAAATGGAGAAAGAACTCGCCGG | HL171596 | 263   | 1.582175   | 2.493920   | 0.18448498 | -0.01403333 | 1.60230824 | 0.98550167  |
| EPH42 | NM_004431_161850_R | ACCTAAAAGAGGAGGATCTTCTTCACATCTTGAAATGGAGAAAGAACTCGCCGG | HL171596 | 11015 | 1.153615   | 5.09620176 | 0.55399051 | -0.02096667 | 3.02103232 | 0.98827676  |
| EPH42 | NM_004431_161850_R | ACCTAAAAGAGGAGGATCTTCTTCACATCTTGAAATGGAGAAAGAACTCGCCGG | HL171596 | 3648  | 1.001869   | 7.962610   | 0.37242691 | -0.01209262 | 5.13709262 | 0.98266136  |
| EPH42 | NM_004431_161850_R | ACCTAAAAGAGGAGGATCTTCTTCACATCTTGAAATGGAGAAAGAACTCGCCGG | HL171596 | 11016 | 2.09781333 | 2.4107475  | 0.10280323 | -0.10333333 | 7.39897276 | 0.77481175  |
| EPH42 | NM_004431_161850_R | ACCTAAAAGAGGAGGATCTTCTTCACATCTTGAAATGGAGAAAGAACTCGCCGG | HL171596 | 264   | 1.4024     |            |            | 0.3333      |            |             |
| EPH42 | NM_004431_161850_R | ACCTAAAAGAGGAGGATCTTCTTCACATCTTGAAATGGAGAAAGAACTCGCCGG | HL171596 | 1790  | 1.352025   | 0.77095094 | 0.00866760 | 0.79336667  | 2.88333824 | 0.57085809  |
| EPH42 | NM_004431_161850_R | ACCTAAAAGAGGAGGATCTTCTTCACATCTTGAAATGGAGAAAGAACTCGCCGG | HL171596 | 12542 | 1.33865    | 0.9120802  | 0.10607009 | 0.33303333  | 4.62011367 | 0.88197674  |
| EPH42 | NM_004431_161850_R | ACCTAAAAGAGGAGGATCTTCTTCACATCTTGAAATGGAGAAAGAACTCGCCGG | HL171596 | 11019 | 1.020495   | 0.4028074  | 2.1236     | 0.4320269   | 1.08851763 | 0.7466      |
| EPH42 | NM_004431_161850_R | ACCTAAAAGAGGAGGATCTTCTTCACATCTTGAAATGGAGAAAGAACTCGCCGG | HL123642 | 389   | -0.491975  | 1.24655881 | 0.36972725 | -0.15603333 | 2.51607455 | 0.89604775  |
| EPH42 | NM_004431_161850_R | ACCTAAAAGAGGAGGATCTTCTTCACATCTTGAAATGGAGAAAGAACTCGCCGG | HL123642 | 7863  | 1.232425   | 0.34707953 | 0.12470953 | 0.12470953  | 0.12470953 | 0.12470953  |
| EPH42 | NM_004431_161850_R | ACCTAAAAGAGGAGGATCTTCTTCACATCTTGAAATGGAGAAAGAACTCGCCGG | HL123642 | 1141  | -1.2275    | 0.32059157 | 0.34978955 | -1.10123333 | 6.21279961 | 0.70883384  |
| EPH42 | NM_004431_161850_R | ACCTAAAAGAGGAGGATCTTCTTCACATCTTGAAATGGAGAAAGAACTCGCCGG | HL123642 | 6993  | 3.38185    | 9.74004236 | 0.45680187 |             |            |             |
| EPH42 | NM_004431_161850_R | ACCTAAAAGAGGAGGATCTTCTTCACATCTTGAAATGGAGAAAGAACTCGCCGG | HL123642 | 12369 | 0.319075   | 3.3224586  | 0.84220069 | -1.586      |            |             |
| EPH42 | NM_004431_161850_R | ACCTAAAAGAGGAGGATCTTCTTCACATCTTGAAATGGAGAAAGAACTCGCCGG | HL123642 | 1617  | -5.2222    |            |            |             |            |             |
| EPH42 | NM_004431_161850_R | ACCTAAAAGAGGAGGATCTTCTTCACATCTTGAAATGGAGAAAGAACTCGCCGG | HL171218 | 1792  | 1.3836     | 3.57303025 | 0.36638049 | -0.17646667 | 1.89811125 | 0.45079673  |
| EPH42 | NM_004431_161850_R | ACCTAAAAGAGGAGGATCTTCTTCACATCTTGAAATGGAGAAAGAACTCGCCGG | HL171218 | 7168  | 2.022295   | 4.32142885 | 0.81272474 | -0.4727     | 1.79574386 | 0.91493006  |
| EPH42 | NM_004431_161850_R | ACCTAAAAGAGGAGGATCTTCTTCACATCTTGAAATGGAGAAAGAACTCGCCGG | HL171218 | 12544 | 2.041225   | 4.02003963 | 0.25336919 | 0.5903      | 1.178745   | 0.821025169 |
| EPH42 | NM_004431_161850_R | ACCTAAAAGAGGAGGATCTTCTTCACATCTTGAAATGGAGAAAGAACTCGCCGG | HL171218 | 277   | -0.04165   | 1.09183055 | 0.8260278  | 0.20066667  | 1.2098464  | 0.66679343  |
| EPH42 | NM_004431_161850_R | ACCTAAAAGAGGAGGATCTTCTTCACATCTTGAAATGGAGAAAGAACTCGCCGG | HL171218 | 8653  | 0.26415    | 1.0932485  | 0.8310068  | 0.27373333  | 1.5532668  | 0.75091167  |
| EPH42 | NM_004431_161850_R | ACCTAAAAGAGGAGGATCTTCTTCACATCTTGAAATGGAGAAAGAACTCGCCGG | HL171218 | 11029 | -0.34975   | 1.0379624  | 0.44359146 | 0.33306667  | 1.5790783  | 0.66426205  |
| EPH42 | NM_004431_161850_R | ACCTAAAAGAGGAGGATCTTCTTCACATCTTGAAATGGAGAAAGAACTCGCCGG | HL171218 | 278   | 1.2892     | 1.61747924 | 0.09972678 | 1.1443      | 1.1632286  | 0.1091402   |
| EPH42 | NM_004431_161850_R | ACCTAAAAGAGGAGGATCTTCTTCACATCTTGAAATGGAGAAAGAACTCGCCGG | HL171218 | 9654  | 0.80492    | 1.93279075 | 0.21983657 | 0.8904      | 1.4387903  | 0.26436632  |
| EPH42 | NM_004431_161850_R | ACCTAAAAGAGGAGGATCTTCTTCACATCTTGAAATGGAGAAAGAACTCGCCGG | HL171218 | 11030 | 0.714275   | 0.8303496  | 0.09383659 | 0.76166667  | 1.9517795  | 0.43864131  |
| EPH42 | NM_004431_161850_R | ACCTAAAAGAGGAGGATCTTCTTCACATCTTGAAATGGAGAAAGAACTCGCCGG | HL498653 | 12546 | 2.132705   | 2.01037311 | 0.17995839 | 0.1094      | 0.6270806  | 0.03849063  |
| EPH42 | NM_004431_161850_R | ACCTAAAAGAGGAGGATCTTCTTCACATCTTGAAATGGAGAAAGAACTCGCCGG | HL498653 | 1794  | 1.68775    | 1.50817973 | 0.05671477 | 0.4205      | 0.7642401  | 0.80417877  |
| EPH42 | NM_004431_161850_R | ACCTAAAAGAGGAGGATCTTCTTCACATCTTGAAATGGAGAAAGAACTCGCCGG | HL498653 | 7170  | 2.22931967 | 1.3398527  | 0.17897539 | 0.9965      | 0.1212379  | 0.80289145  |
| EPH42 | NM_004431_161850_R | ACCTAAAAGAGGAGGATCTTCTTCACATCTTGAAATGGAGAAAGAACTCGCCGG | HL498653 | 1796  | 2.50295    | 2.66283373 | 0.06066425 | -4.3507     | 2.4347166  | 0.02003988  |
| EPH42 | NM_004431_161850_R | ACCTAAAAGAGGAGGATCTTCTTCACATCTTGAAATGGAGAAAGAACTCGCCGG | HL498653 | 7172  | 2.2528     | 2.7802942  | 0.40169373 | -3.895      | 0.5330489  | 0.17138333  |
| EPH42 | NM_004431_161850_R | ACCTAAAAGAGGAGGATCTTCTTCACATCTTGAAATGGAGAAAGAACTCGCCGG | HL498653 | 12548 | 2.8904     | 2.31414444 | 0.07120117 | -3.2891     | 0.9338449  | 0.29316608  |
| EPH42 | NM_004431_161850_R | ACCTAAAAGAGGAGGATCTTCTTCACATCTTGAAATGGAGAAAGAACTCGCCGG | HL292059 | 7402  | 1.9944     | 1.83861905 | 0.08416912 | 1.88053333  | 7.21927658 | 0.98766081  |
| EPH42 | NM_004431_161850_R | ACCTAAAAGAGGAGGATCTTCTTCACATCTTGAAATGGAGAAAGAACTCGCCGG | HL292059 | 12778 | 1.8075     | 1.46653946 | 0.06688615 | 1.38966667  | 6.824404   | 0.63387737  |
| EPH42 | NM_004431_161850_R | ACCTAAAAGAGGAGGATCTTCTTCACATCTTGAAATGGAGAAAGAACTCGCCGG | HL292059 | 7406  | 2.6089     | 1.3846565  | 0.07771838 | -1.5483     | 5.51799564 | 0.584802256 |
| EPH42 | NM_004431_161850_R | ACCTAAAAGAGGAGGATCTTCTTCACATCTTGAAATGGAGAAAGAACTCGCCGG | HL292059 | 12780 |            |            |            | -0.537025   | 0.56938463 | 0.10747209  |
| EPH42 | NM_004431_161850_R | ACCTAAAAGAGGAGGATCTTCTTCACATCTTGAAATGGAGAAAGAACTCGCCGG | HL292059 | 2030  |            |            |            |             |            |             |
| EPH42 | NM_004431_161850_R | ACCTAAAAGAGGAGGATCTTCTTCACATCTTGAAATGGAGAAAGAACTCGCCGG | HL292059 | 12782 | -0.22655   | 0.526441   | 0.58227165 | -0.33306667 | 0.839233   | 0.46142675  |
| EPH42 | NM_004431_161850_R | ACCTAAAAGAGGAGGATCTTCTTCACATCTTGAAATGGAGAAAGAACTCGCCGG | HL7962   | 1800  |            |            |            |             |            |             |
| EPH42 | NM_004431_161850_R | ACCTAAAAGAGGAGGATCTTCTTCACATCTTGAAATGGAGAAAGAACTCGCCGG | HL7962   | 7174  |            |            |            |             |            |             |
| EPH42 | NM_004431_161850_R | ACCTAAAAGAGGAGGATCTTCTTCACATCTTGAAATGGAGAAAGAACTCGCCGG | HL7962   | 12552 |            |            |            |             |            |             |
| EPH42 | NM_004431_161850_R | ACCTAAAAGAGGAGGATCTTCTTCACATCTTGAAATGGAGAAAGAACTCGCCGG | HL7962   | 5655  |            |            |            |             |            |             |
| EPH42 | NM_004431_161850_R | ACCTAAAAGAGGAGGATCTTCTTCACATCTTGAAATGGAGAAAGAACTCGCCGG | HL7962   | 11031 | -0.580275  | 0.53208757 | 0.06194849 | -0.21033333 | 1.12920375 | 0.71030195  |
| EPH42 | NM_004431_161850_R | ACCTAAAAGAGGAGGATCTTCTTCACATCTTGAAATGGAGAAAGAACTCGCCGG | HL7962   | 2379  | 0.2377     | 0.9292485  | 0.14933667 | 0.325       |            |             |
| EPH42 | NM_004431_161850_R | ACCTAAAAGAGGAGGATCTTCTTCACATCTTGAAATGGAGAAAGAACTCGCCGG | HL283613 | 632   | 0.0888     | 0.44983036 | 0.69846349 | 0.39625     | 0.4708171  | 0.15426099  |
| EPH42 | NM_004431_161850_R | ACCTAAAAGAGGAGGATCTTCTTCACATCTTGAAATGGAGAAAGAACTCGCCGG | HL283613 | 633   | -0.82155   | 0.0681114  | 0.00130371 | 0.24835     | 0.5179735  | 0.36676165  |
| EPH42 | NM_004431_161850_R | ACCTAAAAGAGGAGGATCTTCTTCACATCTTGAAATGGAGAAAGAACTCGCCGG | HL283613 | 634   | 0.219225   | 1.4488128  | 0.14023898 | 0.4012366   | 0.9158078  | 0.17337271  |
| EPH42 | NM_004431_161850_R | ACCTAAAAGAGGAGGATCTTCTTCACATCTTGAAATGGAGAAAGAACTCGCCGG | HL283613 | 11384 | 0.67136667 | 0.56509431 | 0.07407468 | 0.3023      | 0.49486604 | 0.0720003   |
| EPH42 | NM_004431_161850_R | ACCTAAAAGAGGAGGATCTTCTTCACATCTTGAAATGGAGAAAGAACTCGCCGG | HL283613 | 633   | -0.82155   | 0.0681114  | 0.00130371 | 0.24835     | 0.5179735  | 0.36676165  |
| EPH42 | NM_004431_161850_R | ACCTAAAAGAGGAGGATCTTCTTCACATCTTGAAATGGAGAAAGAACTCGCCGG | HL283613 | 634   | 0.219225   | 1.4488128  | 0.14023898 | 0.4012366   | 0.9158078  | 0.17337271  |
| EPH42 | NM_004431_161850_R | ACCTAAAAGAGGAGGATCTTCTTCACATCTTGAAATGGAGAAAGAACTCGCCGG | HL283613 | 11385 | -0.49225   | 0.49687245 | 0.08673311 | 0.37485     | 0.62913333 | 0.25300462  |
| EPH42 | NM_004431_161850_R | ACCTAAAAGAGGAGGATCTTCTTCACATCTTGAAATGGAGAAAGAACTCGCCGG | HL283613 | 634   | 0.219225   | 1.4488128  | 0.14023898 | 0.4012366   | 0.9158078  | 0.17337271  |
| EPH42 | NM_004431_161850_R | ACCTAAAAGAGGAGGATCTTCTTCACATCTTGAAATGGAGAAAGAACTCGCCGG | HL283613 | 6010  | 0.32875    | 0.32051483 | 0.12773012 | -0.64775    | 0.2260506  | 0.01124047  |
| EPH42 | NM_004431_161850_R | ACCTAAAAGAGGAGGATCTTCTTCACATCTTGAAATGGAGAAAGAACTCGCCGG | HL283613 | 634   | 0.219225   | 1.4488128  | 0.14023898 | 0.4012366   | 0.9158078  | 0.17337271  |
| EPH42 | NM_004431_161850_R | ACCTAAAAGAGGAGGATCTTCTTCACATCTTGAAATGGAGAAAGAACTCGCCGG | HL116092 | 1826  | 2.23798333 | 2.90641773 | 0.13409575 |             |            |             |
| EPH42 | NM_004431_161850_R | ACCTAAAAGAGGAGGATCTTCTTCACATCTTGAAATGGAGAAAGAACTCGCCGG | HL116092 | 7202  | 4.9169     | 1.00000000 | 0.38016667 | 4.0291007   | 0.8416001  |             |
| EPH42 | NM_004431_161850_R | ACCTAAAAGAGGAGGATCTTCTTCACATCTTGAAATGGAGAAAGAACTCGCCGG | HL116092 | 12578 | 4.20445    | 4.42428552 | 0.06202717 | -1.2555     | 5.7754410  | 0.64774317  |
| EPH42 | NM_004431_161850_R | ACCTAAAAGAGGAGGATCTTCTTCACATCTTGAAATGGAGAAAGAACTCGCCGG | HL116092 | 5656  | -0.581235  | 1.0048484  | 0.21393313 | -3.56883333 | 0.16581983 | 0.00058881  |
| EPH42 | NM_004431_161850_R | ACCTAAAAGAGGAGGATCTTCTTCACATCTTGAAATGGAGAAAGAACTCGCCGG | HL116092 | 11312 | 1.4948     | 1.939881   | 0.23201152 | 3.87906667  | 1.1277449  | 0.00089901  |
| EPH42 | NM_004431_161850_R | ACCTAAAAGAGGAGGATCTTCTTCACATCTTGAAATGGAGAAAGAACTCGCCGG | HL116092 | 280   | 0.3869     |            |            | 0.0266      |            |             |
| EPH42 | NM_004431_161850_R | ACCTAAAAGAGGAGGATCTTCTTCACATCTTGAAATGGAGAAAGAACTCGCCGG | HL116092 | 11031 | -0.49003   | 1.10591396 | 0.84764271 | 0.4046      | 0.7147535  | 0.303747    |
| EPH42 | NM_004431_161850_R | ACCTAAAAGAGGAGGATCTTCTTCACATCTTGAAATGGAGAAAGAACTCGCCGG | HL116092 | 5657  | 0.736975   | 0.8145313  | 0.39626274 | 0.6265      |            |             |
| EPH42 | NM_004431_161850_R | ACCTAAAAGAGGAGGATCTTCTTCACATCTTGAAATGGAGAAAGAACTCGCCGG | HL233229 | 5658  | 0.221625   | 1.38639029 | 0.04697957 | 0.9881      | 2.2515956  | 0.68360220  |
| EPH42 | NM_004431_161850_R | ACCTAAAAGAGGAGGATCTTCTTCACATCTTGAAATGGAGAAAGAACTCGCCGG | HL233229 | 11034 | 0.343775   | 1.86380717 | 0.65396324 | -1.43426667 | 1.515789   | 0.11383712  |
| EPH42 | NM_004431_161850_R | ACCTAAAAGAGGAGGATCTTCTTCACATCTTGAAATGGAGAAAGAACTCGCCGG | HL233229 | 282   |            |            |            |             |            |             |
| EPH42 | NM_004431_161850_R | ACCTAAAAGAGGAGGATCTTCTTCACATCTTGAAATGGAGAAAGAACTCGCCGG | HL233229 | 283   | 1.39965    | 0.66223889 | 0.01280203 | -0.7973     |            |             |
| EPH42 | NM_004431_161850_R | ACCTAAAAGAGGAGGATCTTCTTCACATCTTGAAATGGAGAAAGAACTCGCCGG | HL233229 | 5659  | 0.888375   | 1.2450737  | 0.10793248 | 0.286       | 1.2677371  | 0.65039036  |
| EPH42 | NM_004431_161850_R | ACCTAAAAGAGGAGGATCTTCTTCACATCTTGAAATGGAGAAAGAACTCGCCGG | HL11031  | 7203  | 0.702025   | 0.42254303 | 0.07500000 | 0.3203864   | 0.7300266  | 0.00550636  |
| EPH42 | NM_004431_161850_R | ACCTAAAAGAGGAGGATCTTCTTCACATCTTGAAATGGAGAAAGAACTCGCCGG | HL233229 | 5660  | 1.720075   | 1.13707047 | 0.05518431 | -3.95553333 | 3.85142334 | 0.06885059  |
| EPH42 | NM_004431_161850_R | ACCTAAAAGAGGAGGATCTTCTTCACATCTTGAAATGGAGAAAGAACTCGCCGG | HL233229 | 11036 | 0.292495   | 0.56629000 | 0.04603333 | 0.74280000  | 0.00000000 |             |
| EPH42 | NM_004431_161850_R | ACCTAAAAGAGGAGGATCTTCTTCACATCTTGAAATGGAGAAAGAACTCGCCGG | HL233229 | 284   | 2.6149     |            |            | 0.9825      |            |             |
| EPH42 | NM_004431_161850_R | ACCTAAAAGAGGAGGATCTTCTTCACATCTTGAAATGGAGAAAGAACTCGCCGG | HL2913   | 1827  | -1.17225   | 0.83093074 | 0.1088575  | -4.953333   | 1.9312708  | 0.00090626  |
| EPH42 | NM_004431_161850_R | ACCTAAAAGAGGAGGATCTTCTTCACATCTTGAAATGGAGAAAGAACTCGCCGG | HL2913   | 7204  | 1.1801     | 1.73879374 | 0.05426198 | -4.88933333 | 3.1247282  | 0.02926261  |
| EPH42 | NM_004431_161850_R | ACCTAAAAGAGGAGGATCTTCTTCACATCTTGAAATGGAGAAAGAACTCGCCGG | HL2913   | 12580 | -1.397975  | 1.1834826  | 0.03246204 | -0.09633333 | 3.2159161  | 0.0009091   |
| EPH42 | NM_004431_161850_R | ACCTAAAAGAGGAGGATCTTCTTCACATCTTGAAATGGAGAAAGAACTCGCCGG | HL2913   | 285   | 0.221625   | 1.38639029 | 0.04697957 | 0.9881      | 2.2515956  | 0.68360220  |
| EPH42 | NM_004431_161850_R | ACCTAAAAGAGGAGGATCTTCTTCACATCTTGAAATGGAGAAAGAACTCGCCGG | HL2913   | 5661  | 2.92733333 | 2.42899743 | 0.03146859 | -0.7798     | 0.8970839  | 0.89295104  |
| EPH42 | NM_004431_161850_R | ACCTAAAAGAGGAGGATCTTCTTCACATCTTGAAATGGAGAAAGAACTCGCCGG | HL2913   | 11037 | 2.30196467 | 1.70995541 | 0.03666553 | 0.52346667  | 4.8044173  | 0.81438763  |
| EPH42 | NM_004431_161850_R | ACCTAAAAGAGGAGGATCTTCTTCACATCTTGAAATGGAGAAAGAACTCGCCGG | HL2913   | 1830  | -3.0785    |            |            |             |            |             |
|       |                    |                                                        |          |       |            |            |            |             |            |             |



|      |                   |                                                           |          |        |            |            |             |             |           |            |             |             |
|------|-------------------|-----------------------------------------------------------|----------|--------|------------|------------|-------------|-------------|-----------|------------|-------------|-------------|
| FAMH | NM_018147_36480_R | ACCTAAAAGGGGGTGGATTTGGTATGATGATCTTGGAAATCACTACACACCACCCGG | HL173438 | 2232   | 2.2293375  | 0.46272031 | 0.000160203 |             |           | 1.8530735  | 0.35625284  | 0.000146391 |
| FAMH | NM_018147_36480_R | ACCTAAAAGGGGGTGGATTTGGTATGATGATCTTGGAAATCACTACACACCACCCGG | HL173438 | 768    | 2.2293375  | 0.46272031 | 0.000160203 |             |           | 1.8530735  | 0.35625284  | 0.000146391 |
| FAMH | NM_018147_36480_R | ACCTAAAAGGGGGTGGATTTGGTATGATGATCTTGGAAATCACTACACACCACCCGG | HL173438 | 12984  | 2.1502625  | 0.39201044 | 0.000116315 |             |           | 1.8530735  | 0.35625284  | 0.000146391 |
| FAMH | NM_018147_36480_R | ACCTAAAAGGGGGTGGATTTGGTATGATGATCTTGGAAATCACTACACACCACCCGG | HL173438 | 2258   | 2.1502625  | 0.39201044 | 0.000116315 |             |           | 1.8530735  | 0.35625284  | 0.000146391 |
| FAMH | NM_018147_36480_R | ACCTAAAAGGGGGTGGATTTGGTATGATGATCTTGGAAATCACTACACACCACCCGG | HL173438 | 7534   | 0.52118333 | 0.93558164 | 0.27831738  |             |           | 1.8530735  | 0.35625284  | 0.000146391 |
| FAMH | NM_018147_36480_R | ACCTAAAAGGGGGTGGATTTGGTATGATGATCTTGGAAATCACTACACACCACCCGG | HL173438 | 13010  | 1.48916667 | 0.38124256 | 0.000520923 |             |           | 1.8530735  | 0.35625284  | 0.000146391 |
| FAMH | NM_018147_36480_R | ACCTAAAAGGGGGTGGATTTGGTATGATGATCTTGGAAATCACTACACACCACCCGG | HL173438 | 4878   | 2.2851125  | 0.47496796 | 0.000139933 |             | 1.4496205 | 0.74941107 | 0.009252715 |             |
| FAMH | NM_018147_36480_R | ACCTAAAAGGGGGTGGATTTGGTATGATGATCTTGGAAATCACTACACACCACCCGG | HL173438 | 10254  | 2.5091875  | 0.36322038 | 0.436105    |             | 1.4802925 | 0.69943077 | 0.000678277 |             |
| FAMH | NM_018147_36480_R | ACCTAAAAGGGGGTGGATTTGGTATGATGATCTTGGAAATCACTACACACCACCCGG | HL173438 | 15610  | 1.33114625 | 0.68561617 | 0.000252715 |             | 1.6392625 | 0.51019774 | 0.000400316 |             |
| FAMH | NM_018147_36480_R | ACCTAAAAGGGGGTGGATTTGGTATGATGATCTTGGAAATCACTACACACCACCCGG | HL173438 | 4882   | 1.0862375  | 0.37715513 | 0.003346656 |             | 0.5466225 | 0.23388089 | 0.022819901 |             |
| FAMH | NM_018147_36480_R | ACCTAAAAGGGGGTGGATTTGGTATGATGATCTTGGAAATCACTACACACCACCCGG | HL173438 | 10258  | 1.0862375  | 0.37715513 | 0.003346656 |             | 0.5466225 | 0.23388089 | 0.022819901 |             |
| FAMH | NM_018147_36480_R | ACCTAAAAGGGGGTGGATTTGGTATGATGATCTTGGAAATCACTACACACCACCCGG | HL173438 | 15614  | 1.0541125  | 0.35658020 | 0.00230937  |             | 0.6904875 | 0.1094905  | 0.000525668 |             |
| FAMH | NM_018147_36480_R | ACCTAAAAGGGGGTGGATTTGGTATGATGATCTTGGAAATCACTACACACCACCCGG | HL173438 | 4880   | 0.2957875  | 0.2918042  | 0.14527747  |             | 0.0628475 | 0.5038946  | 0.80511138  |             |
| FAMH | NM_018147_36480_R | ACCTAAAAGGGGGTGGATTTGGTATGATGATCTTGGAAATCACTACACACCACCCGG | HL173438 | 10256  | 0.1609375  | 0.2084462  | 0.339119404 |             | 0.0196425 | 0.3119014  | 0.918271349 |             |
| FAMH | NM_018147_36480_R | ACCTAAAAGGGGGTGGATTTGGTATGATGATCTTGGAAATCACTACACACCACCCGG | HL173438 | 15612  | 0.2711625  | 0.24029174 | 0.158281625 |             | 0.0156125 | 0.3314156  | 0.9370697   |             |
| FAMH | NM_018147_36480_R | ACCTAAAAGGGGGTGGATTTGGTATGATGATCTTGGAAATCACTACACACCACCCGG | HL173438 | 1101   | 0.5069125  | 0.34362032 | 0.060937509 |             |           |            |             |             |
| FAMH | NM_018147_36480_R | ACCTAAAAGGGGGTGGATTTGGTATGATGATCTTGGAAATCACTACACACCACCCGG | HL173438 | 1183   | 0.4731375  | 0.36902150 | 0.05898161  |             |           |            |             |             |
| FAMH | NM_018147_36480_R | ACCTAAAAGGGGGTGGATTTGGTATGATGATCTTGGAAATCACTACACACCACCCGG | HL173438 | 6477   | 0.443125   | 0.34374299 | 0.06236399  |             |           |            |             |             |
| FAMH | NM_018147_36480_R | ACCTAAAAGGGGGTGGATTTGGTATGATGATCTTGGAAATCACTACACACCACCCGG | HL173438 | 1102   | 1.5291425  | 0.53248332 | 0.001476204 |             |           |            |             |             |
| FAMH | NM_018147_36480_R | ACCTAAAAGGGGGTGGATTTGGTATGATGATCTTGGAAATCACTACACACCACCCGG | HL173438 | 6478   | 1.5237575  | 0.46372704 | 0.00097874  |             |           |            |             |             |
| FAMH | NM_018147_36480_R | ACCTAAAAGGGGGTGGATTTGGTATGATGATCTTGGAAATCACTACACACCACCCGG | HL173438 | 11854  | 1.6218975  | 0.44353667 | 0.0063368   |             |           |            |             |             |
| FAMH | NM_018147_36480_R | ACCTAAAAGGGGGTGGATTTGGTATGATGATCTTGGAAATCACTACACACCACCCGG | HL173438 | 1100   | 0.9727375  | 0.303208   | 0.00252264  |             |           |            |             |             |
| FAMH | NM_018147_36480_R | ACCTAAAAGGGGGTGGATTTGGTATGATGATCTTGGAAATCACTACACACCACCCGG | HL173438 | 6476   | 0.9393375  | 0.29428    | 0.00252264  |             |           |            |             |             |
| FAMH | NM_018147_36480_R | ACCTAAAAGGGGGTGGATTTGGTATGATGATCTTGGAAATCACTACACACCACCCGG | HL173438 | 11852  | 0.9393375  | 0.29428    | 0.00252264  |             |           |            |             |             |
| FAMH | NM_018147_36480_R | ACCTAAAAGGGGGTGGATTTGGTATGATGATCTTGGAAATCACTACACACCACCCGG | HL173438 | 4183   | 1.46028333 | 0.3135888  | 0.00114472  |             |           |            |             |             |
| FAMH | NM_018147_36480_R | ACCTAAAAGGGGGTGGATTTGGTATGATGATCTTGGAAATCACTACACACCACCCGG | HL173438 | 9539   | 1.45796667 | 0.2140246  | 0.0014721   |             |           |            |             |             |
| FAMH | NM_018147_36480_R | ACCTAAAAGGGGGTGGATTTGGTATGATGATCTTGGAAATCACTACACACCACCCGG | HL173438 | 14935  | 0.5018875  | 0.4466591  | 0.067381488 |             |           |            |             |             |
| FAMH | NM_018147_36480_R | ACCTAAAAGGGGGTGGATTTGGTATGATGATCTTGGAAATCACTACACACCACCCGG | HL173438 | 4185   |            |            |             |             |           |            |             |             |
| FAMH | NM_018147_36480_R | ACCTAAAAGGGGGTGGATTTGGTATGATGATCTTGGAAATCACTACACACCACCCGG | HL173438 | 14937  |            |            |             |             |           |            |             |             |
| FAMH | NM_018147_36480_R | ACCTAAAAGGGGGTGGATTTGGTATGATGATCTTGGAAATCACTACACACCACCCGG | HL173438 | 2674   | 1.4709775  | 0.4981566  | 0.0007175   |             |           |            |             |             |
| FAMH | NM_018147_36480_R | ACCTAAAAGGGGGTGGATTTGGTATGATGATCTTGGAAATCACTACACACCACCCGG | HL173438 | 8950   | 1.4605     | 0.4317307  | 0.00089925  |             |           |            |             |             |
| FAMH | NM_018147_36480_R | ACCTAAAAGGGGGTGGATTTGGTATGATGATCTTGGAAATCACTACACACCACCCGG | HL173438 | 13426  | 1.4832     | 0.431278   | 0.00042869  |             |           |            |             |             |
| FAMH | NM_018147_36480_R | ACCTAAAAGGGGGTGGATTTGGTATGATGATCTTGGAAATCACTACACACCACCCGG | HL173438 | 2672   | 0.1589775  | 0.4767124  | 0.68116234  |             |           |            |             |             |
| FAMH | NM_018147_36480_R | ACCTAAAAGGGGGTGGATTTGGTATGATGATCTTGGAAATCACTACACACCACCCGG | HL173438 | 8048   | 0.471475   | 1.49428871 | 0.421468834 |             |           |            |             |             |
| FAMH | NM_018147_36480_R | ACCTAAAAGGGGGTGGATTTGGTATGATGATCTTGGAAATCACTACACACCACCCGG | HL173438 | 13424  | 0.471475   | 1.49428871 | 0.421468834 |             |           |            |             |             |
| FAMH | NM_018147_36480_R | ACCTAAAAGGGGGTGGATTTGGTATGATGATCTTGGAAATCACTACACACCACCCGG | HL173438 | 2676   | 0.223675   | 0.8512429  | 0.65725246  |             |           |            |             |             |
| FAMH | NM_018147_36480_R | ACCTAAAAGGGGGTGGATTTGGTATGATGATCTTGGAAATCACTACACACCACCCGG | HL173438 | 8052   | 0.223675   | 0.8512429  | 0.65725246  |             |           |            |             |             |
| FAMH | NM_018147_36480_R | ACCTAAAAGGGGGTGGATTTGGTATGATGATCTTGGAAATCACTACACACCACCCGG | HL173438 | 13428  | 0.1889375  | 0.1819334  | 0.15216479  |             |           |            |             |             |
| FAMH | NM_018147_36480_R | ACCTAAAAGGGGGTGGATTTGGTATGATGATCTTGGAAATCACTACACACCACCCGG | HL173438 | 403917 | 4254       | 0.3207     | 0.36016312  | 0.152146626 |           | -1.32125   | 0.5838398   | 0.000623785 |
| FAMH | NM_018147_36480_R | ACCTAAAAGGGGGTGGATTTGGTATGATGATCTTGGAAATCACTACACACCACCCGG | HL173438 | 15006  | 0.2823275  | 0.4008344  | 0.00027675  |             |           |            |             |             |
| FAMH | NM_018147_36480_R | ACCTAAAAGGGGGTGGATTTGGTATGATGATCTTGGAAATCACTACACACCACCCGG | HL173438 | 403917 | 9630       | 0.76363133 | 0.81657384  | 0.13505667  |           |            |             |             |
| FAMH | NM_018147_36480_R | ACCTAAAAGGGGGTGGATTTGGTATGATGATCTTGGAAATCACTACACACCACCCGG | HL173438 | 4262   | 0.8126175  | 0.8126175  | 0.000000000 |             |           |            |             |             |
| FAMH | NM_018147_36480_R | ACCTAAAAGGGGGTGGATTTGGTATGATGATCTTGGAAATCACTACACACCACCCGG | HL173438 | 143097 | 1.038      | 0.16135559 | 0.01305383  |             | 1.4093511 | 0.01244342 | 0.161688667 | 0.51516989  |
| FAMH | NM_018147_36480_R | ACCTAAAAGGGGGTGGATTTGGTATGATGATCTTGGAAATCACTACACACCACCCGG | HL173438 | 9638   | 1.038      | 0.16135559 | 0.01305383  |             | 1.4093511 | 0.01244342 | 0.161688667 | 0.51516989  |
| FAMH | NM_018147_36480_R | ACCTAAAAGGGGGTGGATTTGGTATGATGATCTTGGAAATCACTACACACCACCCGG | HL173438 | 143097 | 1.038      | 0.16135559 | 0.01305383  |             | 1.4093511 | 0.01244342 | 0.161688667 | 0.51516989  |
| FAMH | NM_018147_36480_R | ACCTAAAAGGGGGTGGATTTGGTATGATGATCTTGGAAATCACTACACACCACCCGG | HL173438 | 9638   | 1.038      | 0.16135559 | 0.01305383  |             | 1.4093511 | 0.01244342 | 0.161688667 | 0.51516989  |
| FAMH | NM_018147_36480_R | ACCTAAAAGGGGGTGGATTTGGTATGATGATCTTGGAAATCACTACACACCACCCGG | HL173438 | 143097 | 1.038      | 0.16135559 | 0.01305383  |             | 1.4093511 | 0.01244342 | 0.161688667 | 0.51516989  |
| FAMH | NM_018147_36480_R | ACCTAAAAGGGGGTGGATTTGGTATGATGATCTTGGAAATCACTACACACCACCCGG | HL173438 | 9638   | 1.038      | 0.16135559 | 0.01305383  |             | 1.4093511 | 0.01244342 | 0.161688667 | 0.51516989  |
| FAMH | NM_018147_36480_R | ACCTAAAAGGGGGTGGATTTGGTATGATGATCTTGGAAATCACTACACACCACCCGG | HL173438 | 143097 | 1.038      | 0.16135559 | 0.01305383  |             | 1.4093511 | 0.01244342 | 0.161688667 | 0.51516989  |
| FAMH | NM_018147_36480_R | ACCTAAAAGGGGGTGGATTTGGTATGATGATCTTGGAAATCACTACACACCACCCGG | HL173438 | 9638   | 1.038      | 0.16135559 | 0.01305383  |             | 1.4093511 | 0.01244342 | 0.161688667 | 0.51516989  |
| FAMH | NM_018147_36480_R | ACCTAAAAGGGGGTGGATTTGGTATGATGATCTTGGAAATCACTACACACCACCCGG | HL173438 | 143097 | 1.038      | 0.16135559 | 0.01305383  |             | 1.4093511 | 0.01244342 | 0.161688667 | 0.51516989  |
| FAMH | NM_018147_36480_R | ACCTAAAAGGGGGTGGATTTGGTATGATGATCTTGGAAATCACTACACACCACCCGG | HL173438 | 9638   | 1.038      | 0.16135559 | 0.01305383  |             | 1.4093511 | 0.01244342 | 0.161688667 | 0.51516989  |
| FAMH | NM_018147_36480_R | ACCTAAAAGGGGGTGGATTTGGTATGATGATCTTGGAAATCACTACACACCACCCGG | HL173438 | 143097 | 1.038      | 0.16135559 | 0.01305383  |             | 1.4093511 | 0.01244342 | 0.161688667 | 0.51516989  |
| FAMH | NM_018147_36480_R | ACCTAAAAGGGGGTGGATTTGGTATGATGATCTTGGAAATCACTACACACCACCCGG | HL173438 | 9638   | 1.038      | 0.16135559 | 0.01305383  |             | 1.4093511 | 0.01244342 | 0.161688667 | 0.51516989  |
| FAMH | NM_018147_36480_R | ACCTAAAAGGGGGTGGATTTGGTATGATGATCTTGGAAATCACTACACACCACCCGG | HL173438 | 143097 | 1.038      | 0.16135559 | 0.01305383  |             | 1.4093511 | 0.01244342 | 0.161688667 | 0.51516989  |
| FAMH | NM_018147_36480_R | ACCTAAAAGGGGGTGGATTTGGTATGATGATCTTGGAAATCACTACACACCACCCGG | HL173438 | 9638   | 1.038      | 0.16135559 | 0.01305383  |             | 1.4093511 | 0.01244342 | 0.161688667 | 0.51516989  |
| FAMH | NM_018147_36480_R | ACCTAAAAGGGGGTGGATTTGGTATGATGATCTTGGAAATCACTACACACCACCCGG | HL173438 | 143097 | 1.038      | 0.16135559 | 0.01305383  |             | 1.4093511 | 0.01244342 | 0.161688667 | 0.51516989  |
| FAMH | NM_018147_36480_R | ACCTAAAAGGGGGTGGATTTGGTATGATGATCTTGGAAATCACTACACACCACCCGG | HL173438 | 9638   | 1.038      | 0.16135559 | 0.01305383  |             | 1.4093511 | 0.01244342 | 0.161688667 | 0.51516989  |
| FAMH | NM_018147_36480_R | ACCTAAAAGGGGGTGGATTTGGTATGATGATCTTGGAAATCACTACACACCACCCGG | HL173438 | 143097 | 1.038      | 0.16135559 | 0.01305383  |             | 1.4093511 | 0.01244342 | 0.161688667 | 0.51516989  |
| FAMH | NM_018147_36480_R | ACCTAAAAGGGGGTGGATTTGGTATGATGATCTTGGAAATCACTACACACCACCCGG | HL173438 | 9638   | 1.038      | 0.16135559 | 0.01305383  |             | 1.4093511 | 0.01244342 | 0.161688667 | 0.51516989  |
| FAMH | NM_018147_36480_R | ACCTAAAAGGGGGTGGATTTGGTATGATGATCTTGGAAATCACTACACACCACCCGG | HL173438 | 143097 | 1.038      | 0.16135559 | 0.01305383  |             | 1.4093511 | 0.01244342 | 0.161688667 | 0.51516989  |
| FAMH | NM_018147_36480_R | ACCTAAAAGGGGGTGGATTTGGTATGATGATCTTGGAAATCACTACACACCACCCGG | HL173438 | 9638   | 1.038      | 0.16135559 | 0.01305383  |             | 1.4093511 | 0.01244342 | 0.161688667 | 0.51516989  |
| FAMH | NM_018147_36480_R | ACCTAAAAGGGGGTGGATTTGGTATGATGATCTTGGAAATCACTACACACCACCCGG | HL173438 | 143097 | 1.038      | 0.16135559 | 0.01305383  |             | 1.4093511 | 0.01244342 | 0.161688667 | 0.51516989  |
| FAMH | NM_018147_36480_R | ACCTAAAAGGGGGTGGATTTGGTATGATGATCTTGGAAATCACTACACACCACCCGG | HL173438 | 9638   | 1.038      | 0.16135559 | 0.01305383  |             | 1.4093511 | 0.01244342 | 0.161688667 | 0.51516989  |
| FAMH | NM_018147_36480_R | ACCTAAAAGGGGGTGGATTTGGTATGATGATCTTGGAAATCACTACACACCACCCGG | HL173438 | 143097 | 1.038      | 0.16135559 | 0.01305383  |             | 1.4093511 | 0.01244342 | 0.161688667 | 0.51516989  |
| FAMH | NM_018147_36480_R | ACCTAAAAGGGGGTGGATTTGGTATGATGATCTTGGAAATCACTACACACCACCCGG | HL173438 |        |            |            |             |             |           |            |             |             |















|        |                    |                                                            |          |       |            |            |             |           |            |             |            |            |            |           |            |             |
|--------|--------------------|------------------------------------------------------------|----------|-------|------------|------------|-------------|-----------|------------|-------------|------------|------------|------------|-----------|------------|-------------|
| HD4C11 | NM_024827_36457_R  | ACCTAAAGGACCCCAATCAATGATTCGATTCCTTGAAATCAAGATCAATGATGGGGGG | HL404802 | 3094  | -1.599725  | 0.28813104 | -0.002459   | 0.63855   | 0.888969   | 0.12510216  | -0.05626   | 0.44216641 | 0.80213821 | -0.149375 | 0.31190197 | 0.468880235 |
| HD4C11 | NM_024827_36458_R  | ACCTAAAGGACCCCAATCAATGATTCGATTCCTTGAAATCAAGATCAATGATGGGGGG | HL404802 | 8470  | -1.599725  | 0.28813104 | -0.002459   | 0.63855   | 0.888969   | 0.12510216  | -0.05626   | 0.44216641 | 0.80213821 | -0.149375 | 0.31190197 | 0.468880235 |
| HD4C11 | NM_024827_36459_R  | ACCTAAAGGACCCCAATCAATGATTCGATTCCTTGAAATCAAGATCAATGATGGGGGG | HL404802 | 13846 | -1.5785    | 0.27255322 | 0.00022049  | -0.6251   | 0.809583   | 0.11163237  | 0.0538     | 0.52349168 | 0.80885141 | -0.03732  | 0.3838182  | 0.37700515  |
| HD4C2  | NM_001527_36316_R  | ACCTAAAGGACCCCAATCAATGATTCGATTCCTTGAAATCAAGATCAATGATGGGGGG | HL41332  | 200   | -1.6705    | 0.19072222 | 0.00000000  | -0.4725   | 0.492222   | 0.01233333  | 0.01233333 | 0.11233333 | 0.29000000 | 0.24925   | 0.2927771  | 0.17522904  |
| HD4C2  | NM_001527_36317_R  | ACCTAAAGGACCCCAATCAATGATTCGATTCCTTGAAATCAAGATCAATGATGGGGGG | HL41332  | 8454  | -1.6482    | 0.26679951 | 0.00000000  | -0.3212   | 0.321231   | 0.06738354  | 0.47425    | 0.3564544  | 0.80200976 | 0.173775  | 0.31869894 | 0.1878747   |
| HD4C2  | NM_001527_36318_R  | ACCTAAAGGACCCCAATCAATGATTCGATTCCTTGAAATCAAGATCAATGATGGGGGG | HL41332  | 13830 | -1.6005    | 0.26666464 | 0.00015048  | -0.2875   | 0.4905317  | 0.33012038  | 0.07495    | 0.3912629  | 0.80392019 | 0.412275  | 0.2927771  | 0.06475863  |
| HD4C2  | NM_001527_36319_R  | ACCTAAAGGACCCCAATCAATGATTCGATTCCTTGAAATCAAGATCAATGATGGGGGG | HL41332  | 3074  | -1.7413    | 0.2718     | 0.00000000  | -0.264    | 0.264      | 0.4084617   | 0.061496   | 0.7415668  | 0.80213821 | 0.04779   | 0.3660864  | 0.1878747   |
| HD4C2  | NM_001527_36320_R  | ACCTAAAGGACCCCAATCAATGATTCGATTCCTTGAAATCAAGATCAATGATGGGGGG | HL41332  | 8450  | -0.5711    | 0.1984396  | 0.01258272  | -0.0455   | 1.2032075  | 0.30052391  | 0.14618    | 0.3749048  | 0.04722502 | 0.0870    | 0.8862176  | 0.08195774  |
| HD4C2  | NM_001527_36321_R  | ACCTAAAGGACCCCAATCAATGATTCGATTCCTTGAAATCAAGATCAATGATGGGGGG | HL41332  | 13832 | -0.1937    | 0.14195    | 0.00000000  | -0.1937   | 0.1937     | 0.1937      | 0.1937     | 0.1937     | 0.1937     | 0.1937    | 0.1937     | 0.1937      |
| HD4C2  | NM_001527_36322_R  | ACCTAAAGGACCCCAATCAATGATTCGATTCCTTGAAATCAAGATCAATGATGGGGGG | HL41332  | 3076  | -0.0175    | 0.1317974  | 0.57880217  | 0.0421    | 0.46125    | 0.0232786   | 0.14645    | 0.3879462  | 0.06204745 | -0.82475  | 0.1304967  | 0.00097838  |
| HD4C2  | NM_001527_36323_R  | ACCTAAAGGACCCCAATCAATGATTCGATTCCTTGAAATCAAGATCAATGATGGGGGG | HL41332  | 8452  | -0.2765    | 0.1848238  | 0.00000000  | -0.2765   | 0.2765     | 0.2765      | 0.2765     | 0.2765     | 0.2765     | 0.2765    | 0.2765     | 0.2765      |
| HD4C2  | NM_001527_36324_R  | ACCTAAAGGACCCCAATCAATGATTCGATTCCTTGAAATCAAGATCAATGATGGGGGG | HL41332  | 13828 | -0.2974    | 0.3201762  | 0.26341338  | 0.2622    | 0.8646159  | 0.47487354  | 0.66723    | 0.4322651  | 0.05410832 | 0.9028    | 0.1994928  | 0.00284364  |
| HD4C3  | NM_003881_361018_R | ACCTAAAGGACCCCAATCAATGATTCGATTCCTTGAAATCAAGATCAATGATGGGGGG | HL519632 | 1187  | -0.340525  | 0.3050762  | 0.14457908  | 0.7777    | 0.1670267  | 0.00993905  |            |            |            |           |            |             |
| HD4C3  | NM_003881_361019_R | ACCTAAAGGACCCCAATCAATGATTCGATTCCTTGAAATCAAGATCAATGATGGGGGG | HL519632 | 6561  | -0.346129  | 0.2918774  | 0.17280045  | 0.1728    | 0.1728     | 0.1728      | 0.1728     | 0.1728     | 0.1728     | 0.1728    | 0.1728     | 0.1728      |
| HD4C3  | NM_003881_361018_R | ACCTAAAGGACCCCAATCAATGATTCGATTCCTTGAAATCAAGATCAATGATGGGGGG | HL519632 | 11939 | -0.3444785 | 0.2170818  | 0.10380089  | 0.07225   | 0.1660277  | 0.00747006  |            |            |            |           |            |             |
| HD4C3  | NM_003881_361052_R | ACCTAAAGGACCCCAATCAATGATTCGATTCCTTGAAATCAAGATCAATGATGGGGGG | HL519632 | 1186  | -0.208126  | 0.3981908  | 0.03268225  | 0.1387    | 0.1387     | 0.1387      | 0.1387     | 0.1387     | 0.1387     | 0.1387    | 0.1387     | 0.1387      |
| HD4C3  | NM_003881_361052_R | ACCTAAAGGACCCCAATCAATGATTCGATTCCTTGAAATCAAGATCAATGATGGGGGG | HL519632 | 6562  | -0.213625  | 0.3749041  | 0.04712923  | 0.07225   | 0.0629712  | 0.73832039  |            |            |            |           |            |             |
| HD4C3  | NM_003881_361052_R | ACCTAAAGGACCCCAATCAATGATTCGATTCCTTGAAATCAAGATCAATGATGGGGGG | HL519632 | 11938 | -0.309626  | 0.3793021  | 0.30598212  | 0.0801    | 0.6181438  | 0.78829197  |            |            |            |           |            |             |
| HD4C3  | NM_003881_361052_R | ACCTAAAGGACCCCAATCAATGATTCGATTCCTTGAAATCAAGATCAATGATGGGGGG | HL519632 | 1185  | -1.553237  | 0.4640975  | 0.000151403 | 0.386175  | 0.386175   | 0.42782491  |            |            |            |           |            |             |
| HD4C3  | NM_003881_361052_R | ACCTAAAGGACCCCAATCAATGATTCGATTCCTTGAAATCAAGATCAATGATGGGGGG | HL519632 | 6561  | -1.569125  | 0.2999879  | 0.00023712  | 0.899295  | 0.301799   | 0.0167249   |            |            |            |           |            |             |
| HD4C3  | NM_003881_361052_R | ACCTAAAGGACCCCAATCAATGATTCGATTCCTTGAAATCAAGATCAATGATGGGGGG | HL519632 | 11937 | -1.469925  | 0.4103229  | 0.000922113 | 0.46625   | 0.5521288  | 0.1599479   |            |            |            |           |            |             |
| HD4C4  | NM_06037_361640_R  | ACCTAAAGGACCCCAATCAATGATTCGATTCCTTGAAATCAAGATCAATGATGGGGGG | HL20516  | 1184  | -1.092287  | 0.6590039  | 0.01371458  | 0.669795  | 0.442256   | 0.007202871 |            |            |            |           |            |             |
| HD4C4  | NM_06037_361640_R  | ACCTAAAGGACCCCAATCAATGATTCGATTCCTTGAAATCAAGATCAATGATGGGGGG | HL20516  | 6560  | -1.071375  | 0.6299894  | 0.01232617  | 0.46625   | 0.4660932  | 0.37079935  |            |            |            |           |            |             |
| HD4C4  | NM_06037_361640_R  | ACCTAAAGGACCCCAATCAATGATTCGATTCCTTGAAATCAAGATCAATGATGGGGGG | HL20516  | 11936 | -1.112375  | 0.7290463  | 0.01795909  | 0.670795  | 0.4561076  | 0.031217    |            |            |            |           |            |             |
| HD4C4  | NM_06037_361640_R  | ACCTAAAGGACCCCAATCAATGATTCGATTCCTTGAAATCAAGATCAATGATGGGGGG | HL20516  | 2252  | -2.032426  | 1.0960348  | 0.00362902  | 0.2925    | 0.05620476 | 0.00041968  |            |            |            |           |            |             |
| HD4C4  | NM_06037_361624_R  | ACCTAAAGGACCCCAATCAATGATTCGATTCCTTGAAATCAAGATCAATGATGGGGGG | HL20516  | 7628  | -2.088615  | 1.2905583  | 0.01067443  | 1.94885   | 0.8271048  | 0.00138084  |            |            |            |           |            |             |
| HD4C4  | NM_06037_361624_R  | ACCTAAAGGACCCCAATCAATGATTCGATTCCTTGAAATCAAGATCAATGATGGGGGG | HL20516  | 13904 | -1.790875  | 0.2164337  | 0.01241441  | 1.2025    | 0.0953747  | 0.00047068  |            |            |            |           |            |             |
| HD4C4  | NM_06037_361624_R  | ACCTAAAGGACCCCAATCAATGATTCGATTCCTTGAAATCAAGATCAATGATGGGGGG | HL20516  | 2250  | -0.573125  | 0.3336033  | 0.00239363  | -0.2103   | 0.5819048  | 0.47660683  |            |            |            |           |            |             |
| HD4C4  | NM_06037_361624_R  | ACCTAAAGGACCCCAATCAATGATTCGATTCCTTGAAATCAAGATCAATGATGGGGGG | HL20516  | 7628  | -0.613215  | 0.4382638  | 0.00217822  | -0.2798   | 0.6814909  | 0.68716075  |            |            |            |           |            |             |
| HD4C4  | NM_06037_361624_R  | ACCTAAAGGACCCCAATCAATGATTCGATTCCTTGAAATCAAGATCAATGATGGGGGG | HL20516  | 13902 | -0.568792  | 0.4200221  | 0.00492232  | -0.19795  | 0.6034111  | 0.50168132  |            |            |            |           |            |             |
| HD4C5  | NM_19205_362099_R  | ACCTAAAGGACCCCAATCAATGATTCGATTCCTTGAAATCAAGATCAATGATGGGGGG | HL519632 | 1183  | -2.181725  | 1.6232842  | 0.02022046  | 0.98779   | 1.4326712  | 0.0879233   |            |            |            |           |            |             |
| HD4C5  | NM_19205_362099_R  | ACCTAAAGGACCCCAATCAATGATTCGATTCCTTGAAATCAAGATCAATGATGGGGGG | HL519632 | 6559  | -2.328625  | 1.8133276  | 0.02043917  | 0.6519    | 1.6093464  | 0.93782968  |            |            |            |           |            |             |
| HD4C5  | NM_19205_362099_R  | ACCTAAAGGACCCCAATCAATGATTCGATTCCTTGAAATCAAGATCAATGATGGGGGG | HL519632 | 11935 | -2.267875  | 1.8860367  | 0.02899009  | -0.18725  | 1.5677199  | 0.70877165  |            |            |            |           |            |             |
| HD4C5  | NM_19205_362099_R  | ACCTAAAGGACCCCAATCAATGATTCGATTCCTTGAAATCAAGATCAATGATGGGGGG | HL519632 | 2248  | -0.1117375 | 0.4832374  | 0.52649749  | -0.2189   | 0.8325198  | 0.55270315  |            |            |            |           |            |             |
| HD4C5  | NM_19205_362099_R  | ACCTAAAGGACCCCAATCAATGATTCGATTCCTTGAAATCAAGATCAATGATGGGGGG | HL519632 | 7624  | -0.0013625 | 0.2917524  | 0.85071634  | 0.397779  | 1.0147791  | 0.38172501  |            |            |            |           |            |             |
| HD4C5  | NM_19205_362099_R  | ACCTAAAGGACCCCAATCAATGATTCGATTCCTTGAAATCAAGATCAATGATGGGGGG | HL519632 | 13907 | -0.4887    | 0.00000000 | 0.00000000  | 0.4887    | 0.4887     | 0.4887      |            |            |            |           |            |             |
| HD4C6  | NM_06004_362407_R  | ACCTAAAGGACCCCAATCAATGATTCGATTCCTTGAAATCAAGATCAATGATGGGGGG | HL47674  | 3080  | -0.807975  | 1.1677960  | 0.14887282  | 0.28375   | 0.4445052  | 0.56648994  |            |            |            |           |            |             |
| HD4C6  | NM_06004_362407_R  | ACCTAAAGGACCCCAATCAATGATTCGATTCCTTGAAATCAAGATCAATGATGGGGGG | HL47674  | 8456  | -0.567725  | 0.1027818  | 0.00261688  | -0.1197   | 1.4132514  | 0.82795033  |            |            |            |           |            |             |
| HD4C6  | NM_06004_362407_R  | ACCTAAAGGACCCCAATCAATGATTCGATTCCTTGAAATCAAGATCAATGATGGGGGG | HL47674  | 13874 | -0.642975  | 0.488195   | 0.01262264  | 0.68729   | 0.32076636 | 0.0281492   |            |            |            |           |            |             |
| HD4C6  | NM_06004_362407_R  | ACCTAAAGGACCCCAATCAATGATTCGATTCCTTGAAATCAAGATCAATGATGGGGGG | HL47674  | 3082  | -0.72825   | 0.2454783  | 0.00611457  | -0.0845   | 0.8958187  | 0.02869814  |            |            |            |           |            |             |
| HD4C6  | NM_06004_362407_R  | ACCTAAAGGACCCCAATCAATGATTCGATTCCTTGAAATCAAGATCAATGATGGGGGG | HL47674  | 8454  | -0.642975  | 0.488195   | 0.01262264  | 0.68729   | 0.32076636 | 0.0281492   |            |            |            |           |            |             |
| HD4C6  | NM_06004_362407_R  | ACCTAAAGGACCCCAATCAATGATTCGATTCCTTGAAATCAAGATCAATGATGGGGGG | HL47674  | 13834 | -1.19125   | 0.1438464  | 0.00060767  | -0.0549   | 0.8817317  | 0.10868922  |            |            |            |           |            |             |
| HD4C6  | NM_06004_362407_R  | ACCTAAAGGACCCCAATCAATGATTCGATTCCTTGAAATCAAGATCAATGATGGGGGG | HL47674  | 3084  | -0.97075   | 0.24400000 | 0.00000000  | -0.97075  | 0.97075    | 0.97075     |            |            |            |           |            |             |
| HD4C6  | NM_06004_362407_R  | ACCTAAAGGACCCCAATCAATGATTCGATTCCTTGAAATCAAGATCAATGATGGGGGG | HL47674  | 8460  | -1.74962   | 0.1799788  | 0.702605    | 0.80265   | 0.2044525  | 0.60368313  |            |            |            |           |            |             |
| HD4C6  | NM_06004_362407_R  | ACCTAAAGGACCCCAATCAATGATTCGATTCCTTGAAATCAAGATCAATGATGGGGGG | HL47674  | 13903 | -1.74962   | 0.1799788  | 0.702605    | 0.80265   | 0.2044525  | 0.60368313  |            |            |            |           |            |             |
| HD4C7A | NM_015401_361048_R | ACCTAAAGGACCCCAATCAATGATTCGATTCCTTGAAATCAAGATCAATGATGGGGGG | HL20063  | 318   | -0.59      | 0.3089787  | 0.0104182   | 0.16267   | 0.5103101  | 0.11284318  |            |            |            |           |            |             |
| HD4C7A | NM_015401_361048_R | ACCTAAAGGACCCCAATCAATGATTCGATTCCTTGAAATCAAGATCAATGATGGGGGG | HL20063  | 8512  | -0.728     | 0.1362079  | 0.0147449   | 0.7076667 | 0.8427269  | 0.1123264   |            |            |            |           |            |             |
| HD4C7A | NM_015401_361048_R | ACCTAAAGGACCCCAATCAATGATTCGATTCCTTGAAATCAAGATCAATGATGGGGGG | HL20063  | 1386  | -0.96      | 0.3118353  | 0.00000000  | -0.96     | 0.96       | 0.96        |            |            |            |           |            |             |
| HD4C7A | NM_015401_361048_R | ACCTAAAGGACCCCAATCAATGATTCGATTCCTTGAAATCAAGATCAATGATGGGGGG | HL20063  | 3134  | -0.87037   | 0.3187346  | 0.0042061   | 1.12623   | 1.7119409  | 0.2119564   |            |            |            |           |            |             |
| HD4C7A | NM_015401_361048_R | ACCTAAAGGACCCCAATCAATGATTCGATTCCTTGAAATCAAGATCAATGATGGGGGG | HL20063  | 8513  | -0.87037   | 0.3187346  | 0.0042061   | 1.12623   | 1.7119409  | 0.2119564   |            |            |            |           |            |             |
| HD4C7A | NM_015401_361048_R | ACCTAAAGGACCCCAATCAATGATTCGATTCCTTGAAATCAAGATCAATGATGGGGGG | HL20063  | 1386  | -0.87037   | 0.3187346  | 0.0042061   | 1.12623   | 1.7119409  | 0.2119564   |            |            |            |           |            |             |
| HD4C7A | NM_015401_361048_R | ACCTAAAGGACCCCAATCAATGATTCGATTCCTTGAAATCAAGATCAATGATGGGGGG | HL20063  | 3134  | -0.87037   | 0.3187346  | 0.0042061   | 1.12623   | 1.7119409  | 0.2119564   |            |            |            |           |            |             |
| HD4C7A | NM_015401_361048_R | ACCTAAAGGACCCCAATCAATGATTCGATTCCTTGAAATCAAGATCAATGATGGGGGG | HL20063  | 8513  | -1.45996   | 0.4141300  | 0.00452106  | 1.18655   | 1.726102   | 0.10872805  |            |            |            |           |            |             |
| HD4C7A | NM_015401_361048_R | ACCTAAAGGACCCCAATCAATGATTCGATTCCTTGAAATCAAGATCAATGATGGGGGG | HL20063  | 1386  | -1.45996   | 0.4141300  | 0.00452106  | 1.18655   | 1.726102   | 0.10872805  |            |            |            |           |            |             |
| HD4C7A |                    |                                                            |          |       |            |            |             |           |            |             |            |            |            |           |            |             |

|     |                    |                                                             |          |       |            |            |             |            |            |              |
|-----|--------------------|-------------------------------------------------------------|----------|-------|------------|------------|-------------|------------|------------|--------------|
| H5S | NM_004712_b0994_R  | ACCTAAAAGCCCTGATCTTCACTCTGATCTTGSATCAACAGTCAAGTGAAGTGAAGGGG | HL514990 | 1179  | -0.1413375 | 0.5874963  | 0.524155618 | 0.497125   | 0.56221596 | 0.11195895   |
| H5S | NM_004712_b0994_R  | ACCTAAAAGCCCTGATCTTCACTCTGATCTTGSATCAACAGTCAAGTGAAGTGAAGGGG | HL514990 | 6236  | -0.1413375 | 0.5874963  | 0.524155618 | 0.497125   | 0.56221596 | 0.11195895   |
| H5S | NM_004712_b0994_R  | ACCTAAAAGCCCTGATCTTCACTCTGATCTTGSATCAACAGTCAAGTGAAGTGAAGGGG | HL514990 | 11931 | -0.1045875 | 0.5818626  | 0.607837064 | 0.5710     | 0.51593017 | 0.05588537   |
| H5S | NM_004712_b0994_R  | ACCTAAAAGCCCTGATCTTCACTCTGATCTTGSATCAACAGTCAAGTGAAGTGAAGGGG | HL514990 | 2274  | -0.2598375 | 0.5818626  | 0.607837064 | 0.5710     | 0.51593017 | 0.05588537   |
| H5S | NM_004712_b0994_R  | ACCTAAAAGCCCTGATCTTCACTCTGATCTTGSATCAACAGTCAAGTGAAGTGAAGGGG | HL514990 | 7416  | -0.5834215 | 0.2312437  | 0.011219758 | 0.07575    | 0.07202109 | 0.05561629   |
| H5S | NM_004712_b0994_R  | ACCTAAAAGCCCTGATCTTCACTCTGATCTTGSATCAACAGTCAAGTGAAGTGAAGGGG | HL514990 | 12992 | -0.5356265 | 0.2310454  | 0.010423457 | 0.03465    | 0.01912413 | 0.04849997   |
| H5S | NM_004712_b0994_R  | ACCTAAAAGCCCTGATCTTCACTCTGATCTTGSATCAACAGTCAAGTGAAGTGAAGGGG | HL514990 | 178   | -0.7183735 | 0.1874271  | 0.007784241 | 0.58323    | 0.42651509 | 0.041125385  |
| H5S | NM_001530_b01283_R | ACCTAAAAGCCCTGATCTTCACTCTGATCTTGSATCAACAGTCAAGTGAAGTGAAGGGG | HL514990 | 6554  | -0.8112125 | 0.2378130  | 0.003359886 | 0.8706     | 0.43529238 | 0.051524809  |
| H5S | NM_001530_b01283_R | ACCTAAAAGCCCTGATCTTCACTCTGATCTTGSATCAACAGTCAAGTGAAGTGAAGGGG | HL514990 | 11910 | -0.7088375 | 0.1791430  | 0.003359886 | 0.0030     | 0.04249435 | 0.050661919  |
| H5S | NM_001530_b02634_R | ACCTAAAAGCCCTGATCTTCACTCTGATCTTGSATCAACAGTCAAGTGAAGTGAAGGGG | HL514990 | 2242  | -0.0016424 | 0.23757605 | 0.003564948 | -0.0036    | 0.69972464 | 0.035506187  |
| H5S | NM_001530_b02634_R | ACCTAAAAGCCCTGATCTTCACTCTGATCTTGSATCAACAGTCAAGTGAAGTGAAGGGG | HL514990 | 7618  | -0.0016424 | 0.23757605 | 0.003564948 | 0.3964     | 0.37006519 | 0.052873914  |
| H5S | NM_001530_b02634_R | ACCTAAAAGCCCTGATCTTCACTCTGATCTTGSATCAACAGTCAAGTGAAGTGAAGGGG | HL514990 | 12994 | -0.0036215 | 0.3584011  | 0.0092244   | 0.06925    | 0.75232308 | 0.0505641    |
| H5S | NM_017902_b01029_R | ACCTAAAAGCCCTGATCTTCACTCTGATCTTGSATCAACAGTCAAGTGAAGTGAAGGGG | HL514990 | 2238  | -1.3929265 | 0.4873343  | 0.0016084   | -0.251     | 0.74428608 | 0.04788495   |
| H5S | NM_017902_b01029_R | ACCTAAAAGCCCTGATCTTCACTCTGATCTTGSATCAACAGTCAAGTGAAGTGAAGGGG | HL514990 | 7414  | -1.3929265 | 0.4873343  | 0.0016084   | 0.0095     | 0.80210864 | 0.078022121  |
| H5S | NM_017902_b01029_R | ACCTAAAAGCCCTGATCTTCACTCTGATCTTGSATCAACAGTCAAGTGAAGTGAAGGGG | HL514990 | 12990 | -1.3730735 | 0.4482994  | 0.001608428 | -0.10375   | 0.7984642  | 0.700128954  |
| H5S | NM_017902_b01029_R | ACCTAAAAGCCCTGATCTTCACTCTGATCTTGSATCAACAGTCAAGTGAAGTGAAGGGG | HL514990 | 1177  | -0.6781215 | 0.3564283  | 0.010273399 | 0.1688     | 0.37006519 | 0.052873914  |
| H5S | NM_017902_b0405_R  | ACCTAAAAGCCCTGATCTTCACTCTGATCTTGSATCAACAGTCAAGTGAAGTGAAGGGG | HL514990 | 6553  | -0.6498375 | 0.39693363 | 0.082289562 | 0.1391     | 0.5097442  | 0.915179364  |
| H5S | NM_017902_b0405_R  | ACCTAAAAGCCCTGATCTTCACTCTGATCTTGSATCAACAGTCAAGTGAAGTGAAGGGG | HL514990 | 11929 | -0.6429625 | 0.4159261  | 0.035743998 | 0.16025    | 0.5898814  | 0.734004919  |
| H5S | NM_017902_b0817_R  | ACCTAAAAGCCCTGATCTTCACTCTGATCTTGSATCAACAGTCAAGTGAAGTGAAGGGG | HL514990 | 1164  | -0.6240215 | 0.1507587  | 0.05444808  | -0.0198    | 0.5475566  | 0.70155904   |
| H5S | NM_017902_b0817_R  | ACCTAAAAGCCCTGATCTTCACTCTGATCTTGSATCAACAGTCAAGTGAAGTGAAGGGG | HL514990 | 6540  | -0.7538975 | 0.3002894  | 0.0607865   | -0.075     | 0.3821379  | 0.75262444   |
| H5S | NM_017902_b0817_R  | ACCTAAAAGCCCTGATCTTCACTCTGATCTTGSATCAACAGTCAAGTGAAGTGAAGGGG | HL514990 | 11916 | -0.9584875 | 0.2309293  | 0.002756141 | 0.0096     | 0.6497272  | 0.454849141  |
| H5S | NM_152794_b0345_R  | ACCTAAAAGCCCTGATCTTCACTCTGATCTTGSATCAACAGTCAAGTGAAGTGAAGGGG | HL420830 | 2234  | -0.1690925 | 0.1964827  | 0.2421128   | -0.239     | 0.3614766  | 0.188628209  |
| H5S | NM_152794_b0345_R  | ACCTAAAAGCCCTGATCTTCACTCTGATCTTGSATCAACAGTCAAGTGAAGTGAAGGGG | HL420830 | 7610  | -0.2091125 | 0.20214624 | 0.161861818 | -0.3527325 | 0.37499558 | 0.144495881  |
| H5S | NM_152794_b0345_R  | ACCTAAAAGCCCTGATCTTCACTCTGATCTTGSATCAACAGTCAAGTGAAGTGAAGGGG | HL420830 | 12986 | -0.1739625 | 0.2203915  | 0.228900021 | -0.2737    | 0.3187423  | 0.24401376   |
| H5S | NM_152794_b0345_R  | ACCTAAAAGCCCTGATCTTCACTCTGATCTTGSATCAACAGTCAAGTGAAGTGAAGGGG | HL420830 | 2236  | -0.5067975 | 0.5428028  | 0.07896114  | 0.10255    | 0.5898814  | 0.734004919  |
| H5S | NM_152794_b0934_R  | ACCTAAAAGCCCTGATCTTCACTCTGATCTTGSATCAACAGTCAAGTGAAGTGAAGGGG | HL420830 | 7612  | -0.6686265 | 0.16163425 | 0.01431379  | -0.143     | 0.6881377  | 0.37056814   |
| H5S | NM_152794_b0934_R  | ACCTAAAAGCCCTGATCTTCACTCTGATCTTGSATCAACAGTCAAGTGAAGTGAAGGGG | HL420830 | 12988 | -0.5123735 | 0.2019282  | 0.00131262  | 0.0038     | 0.5354643  | 0.307079379  |
| H5S | NM_152794_b0934_R  | ACCTAAAAGCCCTGATCTTCACTCTGATCTTGSATCAACAGTCAAGTGAAGTGAAGGGG | HL420830 | 1163  | -1.3519875 | 0.2019282  | 0.00131262  | 0.843237   | 0.7308945  | 0.03488801   |
| H5S | NM_152794_b0934_R  | ACCTAAAAGCCCTGATCTTCACTCTGATCTTGSATCAACAGTCAAGTGAAGTGAAGGGG | HL420830 | 6539  | -1.3126265 | 0.1862292  | 0.0013862   | 0.1385     | 0.6954241  | 0.03116880   |
| H5S | NM_152794_b0934_R  | ACCTAAAAGCCCTGATCTTCACTCTGATCTTGSATCAACAGTCAAGTGAAGTGAAGGGG | HL420830 | 11915 | -1.3281875 | 0.1885237  | 0.00132228  | 0.91222    | 0.7674642  | 0.0286853    |
| H5S | NM_003599_b02525_R | ACCTAAAAGCCCTGATCTTCACTCTGATCTTGSATCAACAGTCAAGTGAAGTGAAGGGG | HL524815 | 3531  | -0.821675  | 0.2579109  | 0.00391173  | -0.1305375 | 0.5261893  | 0.30658684   |
| H5S | NM_003599_b02525_R | ACCTAAAAGCCCTGATCTTCACTCTGATCTTGSATCAACAGTCAAGTGAAGTGAAGGGG | HL524815 | 8907  | -0.1646245 | 0.3368121  | 0.521388466 | -0.2527125 | 0.37499558 | 0.30658684   |
| H5S | NM_003599_b02525_R | ACCTAAAAGCCCTGATCTTCACTCTGATCTTGSATCAACAGTCAAGTGAAGTGAAGGGG | HL524815 | 14283 | -0.818425  | 0.1460389  | 0.002249219 | -0.079375  | 0.5604227  | 0.70987714   |
| H5S | NM_003599_b02525_R | ACCTAAAAGCCCTGATCTTCACTCTGATCTTGSATCAACAGTCAAGTGAAGTGAAGGGG | HL524815 | 3003  | -0.0611    | 0.4408207  | 0.16450000  | -0.2524125 | 0.37499558 | 0.30658684   |
| H5S | NM_003599_b02525_R | ACCTAAAAGCCCTGATCTTCACTCTGATCTTGSATCAACAGTCAAGTGAAGTGAAGGGG | HL524815 | 8979  | -0.620375  | 0.1790885  | 0.008119919 | -0.180125  | 0.2806137  | 0.38793482   |
| H5S | NM_003599_b02525_R | ACCTAAAAGCCCTGATCTTCACTCTGATCTTGSATCAACAGTCAAGTGAAGTGAAGGGG | HL524815 | 14285 | -0.1426    | 0.1782945  | 0.001296187 | 0.1296187  | 0.4444117  | 0.24296187   |
| H5S | NM_003599_b02525_R | ACCTAAAAGCCCTGATCTTCACTCTGATCTTGSATCAACAGTCAAGTGAAGTGAAGGGG | HL524815 | 3529  | -0.05955   | 0.2101332  | 0.73969919  | 0.8862125  | 0.3641112  | 0.006811479  |
| H5S | NM_003599_b02525_R | ACCTAAAAGCCCTGATCTTCACTCTGATCTTGSATCAACAGTCAAGTGAAGTGAAGGGG | HL524815 | 8905  | -0.04525   | 0.2802942  | 0.7890175   | 0.526326   | 0.3793672  | 0.04626209   |
| H5S | NM_003599_b02525_R | ACCTAAAAGCCCTGATCTTCACTCTGATCTTGSATCAACAGTCAAGTGAAGTGAAGGGG | HL524815 | 14281 | -0.03075   | 0.1771781  | 0.8114207   | 0.007129   | 0.2466029  | 0.00181448   |
| H5S | NM_198208_b0250_R  | ACCTAAAAGCCCTGATCTTCACTCTGATCTTGSATCAACAGTCAAGTGAAGTGAAGGGG | HL53263  | 1942  | -0.16942   | 0.20214624 | 0.161861818 | -2.286     |            |              |
| H5S | NM_198208_b0250_R  | ACCTAAAAGCCCTGATCTTCACTCTGATCTTGSATCAACAGTCAAGTGAAGTGAAGGGG | HL53263  | 7318  | -0.16942   | 0.20214624 | 0.161861818 | -2.736     |            |              |
| H5S | NM_198208_b0250_R  | ACCTAAAAGCCCTGATCTTCACTCTGATCTTGSATCAACAGTCAAGTGAAGTGAAGGGG | HL53263  | 12694 | -0.16942   | 0.20214624 | 0.161861818 | -1.4147    |            |              |
| H5S | NM_198208_b0250_R  | ACCTAAAAGCCCTGATCTTCACTCTGATCTTGSATCAACAGTCAAGTGAAGTGAAGGGG | HL53263  | 7310  | -0.16942   | 0.20214624 | 0.161861818 | -7.038     |            |              |
| H5S | NM_198208_b0250_R  | ACCTAAAAGCCCTGATCTTCACTCTGATCTTGSATCAACAGTCAAGTGAAGTGAAGGGG | HL53263  | 12696 | -0.16942   | 0.20214624 | 0.161861818 | -1.4147    |            |              |
| H5S | NM_198208_b0250_R  | ACCTAAAAGCCCTGATCTTCACTCTGATCTTGSATCAACAGTCAAGTGAAGTGAAGGGG | HL53263  | 1930  | -0.16942   | 0.20214624 | 0.161861818 | -7.038     |            |              |
| H5S | NM_198208_b0250_R  | ACCTAAAAGCCCTGATCTTCACTCTGATCTTGSATCAACAGTCAAGTGAAGTGAAGGGG | HL53263  | 7346  | -0.16942   | 0.20214624 | 0.161861818 | -1.4147    |            |              |
| H5S | NM_198208_b0250_R  | ACCTAAAAGCCCTGATCTTCACTCTGATCTTGSATCAACAGTCAAGTGAAGTGAAGGGG | HL53263  | 12722 | -0.16942   | 0.20214624 | 0.161861818 | -8.971     |            |              |
| H5S | NM_027240_b01121_R | ACCTAAAAGCCCTGATCTTCACTCTGATCTTGSATCAACAGTCAAGTGAAGTGAAGGGG | HL397465 | 680   | 0.3638     | 0.9882829  | 0.899910335 | 0.209785   | 0.4394797  | 0.403999102  |
| H5S | NM_027240_b01121_R | ACCTAAAAGCCCTGATCTTCACTCTGATCTTGSATCAACAGTCAAGTGAAGTGAAGGGG | HL397465 | 6056  | -0.2438    | 0.3966575  | 0.51868722  | 0.61066667 | 0.1324633  | 0.03232843   |
| H5S | NM_027240_b01121_R | ACCTAAAAGCCCTGATCTTCACTCTGATCTTGSATCAACAGTCAAGTGAAGTGAAGGGG | HL397465 | 11432 | -0.2088    | 0.3966575  | 0.51868722  | -1.001175  | 0.3735417  | 0.00531832   |
| H5S | NM_027240_b01121_R | ACCTAAAAGCCCTGATCTTCACTCTGATCTTGSATCAACAGTCAAGTGAAGTGAAGGGG | HL397465 | 681   | -0.2059667 | 0.2299808  | 0.342254757 | -0.001175  | 0.3735417  | 0.00531832   |
| H5S | NM_027240_b01121_R | ACCTAAAAGCCCTGATCTTCACTCTGATCTTGSATCAACAGTCAAGTGAAGTGAAGGGG | HL397465 | 6057  | -0.1369    | 0.2679032  | 0.53027256  | 0.81332133 | 0.3604343  | 0.15338974   |
| H5S | NM_027240_b01121_R | ACCTAAAAGCCCTGATCTTCACTCTGATCTTGSATCAACAGTCAAGTGAAGTGAAGGGG | HL397465 | 11431 | -0.2088    | 0.3966575  | 0.51868722  | -1.001175  | 0.3735417  | 0.00531832   |
| H5S | NM_027240_b01121_R | ACCTAAAAGCCCTGATCTTCACTCTGATCTTGSATCAACAGTCAAGTGAAGTGAAGGGG | HL397465 | 681   | -0.2059667 | 0.2299808  | 0.342254757 | -0.001175  | 0.3735417  | 0.00531832   |
| H5S | NM_027240_b01121_R | ACCTAAAAGCCCTGATCTTCACTCTGATCTTGSATCAACAGTCAAGTGAAGTGAAGGGG | HL397465 | 6057  | -0.1369    | 0.2679032  | 0.53027256  | 0.81332133 | 0.3604343  | 0.15338974   |
| H5S | NM_027240_b01121_R | ACCTAAAAGCCCTGATCTTCACTCTGATCTTGSATCAACAGTCAAGTGAAGTGAAGGGG | HL397465 | 11431 | -0.2088    | 0.3966575  | 0.51868722  | -1.001175  | 0.3735417  | 0.00531832   |
| H5S | NM_027240_b01121_R | ACCTAAAAGCCCTGATCTTCACTCTGATCTTGSATCAACAGTCAAGTGAAGTGAAGGGG | HL397465 | 681   | -0.2059667 | 0.2299808  | 0.342254757 | -0.001175  | 0.3735417  | 0.00531832   |
| H5S | NM_027240_b01121_R | ACCTAAAAGCCCTGATCTTCACTCTGATCTTGSATCAACAGTCAAGTGAAGTGAAGGGG | HL397465 | 6057  | -0.1369    | 0.2679032  | 0.53027256  | 0.81332133 | 0.3604343  | 0.15338974   |
| H5S | NM_027240_b01121_R | ACCTAAAAGCCCTGATCTTCACTCTGATCTTGSATCAACAGTCAAGTGAAGTGAAGGGG | HL397465 | 11431 | -0.2088    | 0.3966575  | 0.51868722  | -1.001175  | 0.3735417  | 0.00531832   |
| H5S | NM_027240_b01121_R | ACCTAAAAGCCCTGATCTTCACTCTGATCTTGSATCAACAGTCAAGTGAAGTGAAGGGG | HL397465 | 681   | -0.2059667 | 0.2299808  | 0.342254757 | -0.001175  | 0.3735417  | 0.00531832   |
| H5S | NM_027240_b01121_R | ACCTAAAAGCCCTGATCTTCACTCTGATCTTGSATCAACAGTCAAGTGAAGTGAAGGGG | HL397465 | 6057  | -0.1369    | 0.2679032  | 0.53027256  | 0.81332133 | 0.3604343  | 0.15338974   |
| H5S | NM_027240_b01121_R | ACCTAAAAGCCCTGATCTTCACTCTGATCTTGSATCAACAGTCAAGTGAAGTGAAGGGG | HL397465 | 11431 | -0.2088    | 0.3966575  | 0.51868722  | -1.001175  | 0.3735417  | 0.00531832   |
| H5S | NM_027240_b01121_R | ACCTAAAAGCCCTGATCTTCACTCTGATCTTGSATCAACAGTCAAGTGAAGTGAAGGGG | HL397465 | 681   | -0.2059667 | 0.2299808  | 0.342254757 | -0.001175  | 0.3735417  | 0.00531832   |
| H5S | NM_027240_b01121_R | ACCTAAAAGCCCTGATCTTCACTCTGATCTTGSATCAACAGTCAAGTGAAGTGAAGGGG | HL397465 | 6057  | -0.1369    | 0.2679032  | 0.53027256  | 0.81332133 | 0.3604343  | 0.15338974   |
| H5S | NM_027240_b01121_R | ACCTAAAAGCCCTGATCTTCACTCTGATCTTGSATCAACAGTCAAGTGAAGTGAAGGGG | HL397465 | 11431 | -0.2088    | 0.3966575  | 0.51868722  | -1.001175  | 0.3735417  | 0.00531832   |
| H5S | NM_027240_b01121_R | ACCTAAAAGCCCTGATCTTCACTCTGATCTTGSATCAACAGTCAAGTGAAGTGAAGGGG | HL397465 | 681   | -0.2059667 | 0.2299808  | 0.342254757 | -0.001175  | 0.3735417  | 0.00531832   |
| H5S | NM_027240_b01121_R | ACCTAAAAGCCCTGATCTTCACTCTGATCTTGSATCAACAGTCAAGTGAAGTGAAGGGG | HL397465 | 6057  | -0.1369    | 0.2679032  | 0.53027256  | 0.81332133 | 0.3604343  | 0.15338974   |
| H5S | NM_027240_b01121_R | ACCTAAAAGCCCTGATCTTCACTCTGATCTTGSATCAACAGTCAAGTGAAGTGAAGGGG | HL397465 | 11431 | -0.2088    | 0.3966575  | 0.51868722  | -1.001175  | 0.3735417  | 0.00531832   |
| H5S | NM_027240_b01121_R | ACCTAAAAGCCCTGATCTTCACTCTGATCTTGSATCAACAGTCAAGTGAAGTGAAGGGG | HL397465 | 681   | -0.2059667 | 0.2299808  | 0.342254757 | -0.001175  | 0.3735417  | 0.00531832   |
| H5S | NM_027240_b01121_R | ACCTAAAAGCCCTGATCTTCACTCTGATCTTGSATCAACAGTCAAGTGAAGTGAAGGGG | HL397465 | 6057  | -0.1369    | 0.2679032  | 0.53027256  | 0.81332133 | 0.3604343  | 0.15338974   |
| H5S | NM_027240_b01121_R | ACCTAAAAGCCCTGATCTTCACTCTGATCTTGSATCAACAGTCAAGTGAAGTGAAGGGG | HL397465 | 11431 | -0.2088    | 0.3966575  | 0.51868722  | -1.001175  | 0.3735417  | 0.00531832   |
| H5S | NM_027240_b01121_R | ACCTAAAAGCCCTGATCTTCACTCTGATCTTGSATCAACAGTCAAGTGAAGTGAAGGGG | HL397465 | 681   | -0.2059667 | 0.2299808  | 0.342254757 | -0.001175  | 0.3735417  | 0.00531832</ |

|         |                   |                                                         |          |       |            |            |             |           |            |             |
|---------|-------------------|---------------------------------------------------------|----------|-------|------------|------------|-------------|-----------|------------|-------------|
| HPCALL  | A693973_3d298r_R  | ACCTAAAAGGCTTGTGTGGTATTATCTCTTGATATCAATCAACCAACACAGCCGG | HL580427 | 14644 | 0.350625   | 0.58079397 | 0.23391102  | 1.18935   | 0.2783054  | 0.39663912  |
| HPCALL  | A693973_3d212r_R  | ACCTAAAAGGCTTGTGTGGTATTATCTCTTGATATCAATCAACCAACACAGCCGG | HL580427 | 2890  | 0.350625   | 0.58079397 | 0.23391102  | 1.18935   | 0.2783054  | 0.39663912  |
| HPCALL  | A693973_3d212r_R  | ACCTAAAAGGCTTGTGTGGTATTATCTCTTGATATCAATCAACCAACACAGCCGG | HL580427 | 9266  | -1.0148975 | 0.35067364 | 0.00215452  | -0.78373  | 0.3078166  | 0.00761698  |
| HPCALL  | A693973_3d212r_R  | ACCTAAAAGGCTTGTGTGGTATTATCTCTTGATATCAATCAACCAACACAGCCGG | HL580427 | 1464  | 0.846125   | 0.63270131 | 0.03121178  | 0.051     | 0.4123054  | 0.01153382  |
| HPN     | NL18283_3d011r_L  | ACCTAAAAGGCTTGTGTGGTATTATCTCTTGATATCAATCAACCAACACAGCCGG | HL182835 | 1191  | 0.846125   | 0.63270131 | 0.03121178  | 0.051     | 0.4123054  | 0.01153382  |
| HPN     | NL18283_3d011r_L  | ACCTAAAAGGCTTGTGTGGTATTATCTCTTGATATCAATCAACCAACACAGCCGG | HL182835 | 6538  | 0.7819375  | 0.62948131 | 0.04211756  | -0.055    | 0.3489494  | 0.8217863   |
| HPN     | NL18283_3d011r_L  | ACCTAAAAGGCTTGTGTGGTATTATCTCTTGATATCAATCAACCAACACAGCCGG | HL182835 | 1191  | 0.846125   | 0.63270131 | 0.03121178  | 0.051     | 0.4123054  | 0.01153382  |
| HPN     | NL18283_3d0175r_R | ACCTAAAAGGCTTGTGTGGTATTATCTCTTGATATCAATCAACCAACACAGCCGG | HL182835 | 2208  | 2.5074375  | 0.39146015 | 5.846E-05   | 1.452725  | 0.38917517 | 0.00061893  |
| HPN     | NL18283_3d0175r_R | ACCTAAAAGGCTTGTGTGGTATTATCTCTTGATATCAATCAACCAACACAGCCGG | HL182835 | 798   | 1.4852025  | 0.62948131 | 0.04211756  | 0.051     | 0.3489494  | 0.00074879  |
| HPN     | NL18283_3d176r_R  | ACCTAAAAGGCTTGTGTGGTATTATCTCTTGATATCAATCAACCAACACAGCCGG | HL182835 | 12960 | 2.4837875  | 0.47315121 | 0.00011962  | 1.4138    | 0.3869667  | 0.00709756  |
| HPN     | NL18283_3d176r_R  | ACCTAAAAGGCTTGTGTGGTATTATCTCTTGATATCAATCAACCAACACAGCCGG | HL182835 | 1141  | 0.846125   | 0.63270131 | 0.03121178  | 0.051     | 0.4123054  | 0.01153382  |
| HPN     | NL18283_3d176r_R  | ACCTAAAAGGCTTGTGTGGTATTATCTCTTGATATCAATCAACCAACACAGCCGG | HL182835 | 6537  | 0.7121815  | 0.36487654 | 0.27489951  | -0.2575   | 0.1832041  | 0.213581189 |
| HPN     | NL18283_3d175r_R  | ACCTAAAAGGCTTGTGTGGTATTATCTCTTGATATCAATCAACCAACACAGCCGG | HL182835 | 11913 | -0.0200285 | 0.51460023 | 0.87315804  | -0.2105   | 0.2224288  | 0.311405403 |
| HPN     | NL17975_3d027r_R  | ACCTAAAAGGCTTGTGTGGTATTATCTCTTGATATCAATCAACCAACACAGCCGG | HL179003 | 2204  | 1.0497238  | 0.62948131 | 0.04211756  | 0.051     | 0.3489494  | 0.36629184  |
| HRAS    | NL17975_3d027r_R  | ACCTAAAAGGCTTGTGTGGTATTATCTCTTGATATCAATCAACCAACACAGCCGG | HL179003 | 7580  | 0.1127625  | 0.68513879 | 0.809412684 | 1.0621    | 0.3223593  | 0.39708635  |
| HRAS    | NL17975_3d027r_R  | ACCTAAAAGGCTTGTGTGGTATTATCTCTTGATATCAATCAACCAACACAGCCGG | HL179003 | 12956 | 0.0097035  | 0.6847876  | 0.848500007 | 0.12021   | 0.0700611  | 0.428854969 |
| HRAS    | NL17975_3d121r_R  | ACCTAAAAGGCTTGTGTGGTATTATCTCTTGATATCAATCAACCAACACAGCCGG | HL179003 | 1160  | 0.2914875  | 0.32824562 | 0.06418995  | 0.3861    | 0.3970867  | 0.13490056  |
| HRAS    | NL17975_3d121r_R  | ACCTAAAAGGCTTGTGTGGTATTATCTCTTGATATCAATCAACCAACACAGCCGG | HL179003 | 6536  | -0.4498375 | 0.39735121 | 0.052377336 | 0.312     | 0.4041096  | 0.151232362 |
| HRAS    | NL17975_3d121r_R  | ACCTAAAAGGCTTGTGTGGTATTATCTCTTGATATCAATCAACCAACACAGCCGG | HL179003 | 11912 | -0.4201215 | 0.33353814 | 0.40999475  | 0.387475  | 0.4333743  | 0.146927005 |
| HRAS    | NL17975_3d046r_R  | ACCTAAAAGGCTTGTGTGGTATTATCTCTTGATATCAATCAACCAACACAGCCGG | HL179003 | 2208  | 0.1028785  | 0.7032586  | 0.853547229 | 0.3162    | 0.3424006  | 0.01991489  |
| HRAS    | NL17975_3d046r_R  | ACCTAAAAGGCTTGTGTGGTATTATCTCTTGATATCAATCAACCAACACAGCCGG | HL179003 | 7582  | 0.0976725  | 0.71455532 | 0.90584427  | 1.1675    | 1.2834952  | 0.02811601  |
| HRAS    | NL17975_3d046r_R  | ACCTAAAAGGCTTGTGTGGTATTATCTCTTGATATCAATCAACCAACACAGCCGG | HL179003 | 12958 | 0.1731215  | 0.73887382 | 0.863205232 | 0.4149    | 0.4874007  | 0.1392024   |
| HRK     | NL03806_3d044r_R  | ACCTAAAAGGCTTGTGTGGTATTATCTCTTGATATCAATCAACCAACACAGCCGG | HL87427  | 615   | -0.8974875 | 0.10788975 | 0.001337236 | -0.322665 | 0.8865955  | 0.378149966 |
| HRK     | NL03806_3d044r_R  | ACCTAAAAGGCTTGTGTGGTATTATCTCTTGATATCAATCAACCAACACAGCCGG | HL87427  | 6152  | -0.9002625 | 0.08181531 | 0.001166834 | -0.00956  | 0.9252846  | 0.81269313  |
| HRK     | NL03806_3d044r_R  | ACCTAAAAGGCTTGTGTGGTATTATCTCTTGATATCAATCAACCAACACAGCCGG | HL87427  | 11568 | -0.063025  | 0.12808161 | 0.001337236 | -0.1124   | 0.9302352  | 0.874111847 |
| HRK     | NL03806_3d064r_R  | ACCTAAAAGGCTTGTGTGGTATTATCTCTTGATATCAATCAACCAACACAGCCGG | HL87427  | 2170  |            |            |             | -1.039    |            |             |
| HRK     | NL03806_3d064r_R  | ACCTAAAAGGCTTGTGTGGTATTATCTCTTGATATCAATCAACCAACACAGCCGG | HL87427  | 7546  |            |            |             | -1.9438   |            |             |
| HRK     | NL03806_3d064r_R  | ACCTAAAAGGCTTGTGTGGTATTATCTCTTGATATCAATCAACCAACACAGCCGG | HL87427  | 12922 |            |            |             | -0.954    |            |             |
| HRK     | NL03806_3d067r_R  | ACCTAAAAGGCTTGTGTGGTATTATCTCTTGATATCAATCAACCAACACAGCCGG | HL87427  | 837   | 0.0026525  | 0.39863145 | 0.769129884 |           |            |             |
| HRK     | NL03806_3d067r_R  | ACCTAAAAGGCTTGTGTGGTATTATCTCTTGATATCAATCAACCAACACAGCCGG | HL87427  | 6205  | -0.4545    |            |             | -0.1096   |            |             |
| HSF90A1 | NL05348_3d101r_R  | ACCTAAAAGGCTTGTGTGGTATTATCTCTTGATATCAATCAACCAACACAGCCGG | HL52660  | 11581 | 1.51330875 | 2.40661787 | 0.17679366  | 1.32423   | 1.40226346 | 0.08163721  |
| HSF90A1 | NL05348_3d101r_R  | ACCTAAAAGGCTTGTGTGGTATTATCTCTTGATATCAATCAACCAACACAGCCGG | HL52660  | 2200  |            |            |             | 0.8491    | 0.9113413  | 0.08823436  |
| HSF90A1 | NL05348_3d101r_R  | ACCTAAAAGGCTTGTGTGGTATTATCTCTTGATATCAATCAACCAACACAGCCGG | HL52660  | 12952 | 1.7708375  | 2.44173042 | 0.152149708 | 1.18935   | 1.0073018  | 0.206517181 |
| HSF90A1 | NL05348_3d101r_R  | ACCTAAAAGGCTTGTGTGGTATTATCTCTTGATATCAATCAACCAACACAGCCGG | HL52660  | 2202  | 0.7430125  | 0.59347100 | 0.04398842  | 0.394675  | 0.3235564  | 0.10775126  |
| HSF90A1 | NL05348_3d101r_R  | ACCTAAAAGGCTTGTGTGGTATTATCTCTTGATATCAATCAACCAACACAGCCGG | HL52660  | 7578  | 0.22025    | 0.62948131 | 0.04211756  | 0.051     | 0.3489494  | 0.00074879  |
| HSF90A1 | NL05348_3d101r_R  | ACCTAAAAGGCTTGTGTGGTATTATCTCTTGATATCAATCAACCAACACAGCCGG | HL52660  | 12956 | 0.8248575  | 0.58079397 | 0.03026234  | 0.0214    | 0.3734663  | 0.0479624   |
| HSF90A1 | NL05348_3d204r_R  | ACCTAAAAGGCTTGTGTGGTATTATCTCTTGATATCAATCAACCAACACAGCCGG | HL52660  | 1159  | -0.4883735 | 0.40942526 | 0.07200427  | -0.5965   | 0.1977460  | 0.7919378   |
| HSF90A1 | NL05348_3d204r_R  | ACCTAAAAGGCTTGTGTGGTATTATCTCTTGATATCAATCAACCAACACAGCCGG | HL52660  | 6531  | -0.4348075 | 0.6574178  | 0.120796679 | 0.0646    | 0.1973901  | 0.75602902  |
| HSF90A1 | NL05348_3d204r_R  | ACCTAAAAGGCTTGTGTGGTATTATCTCTTGATATCAATCAACCAACACAGCCGG | HL52660  | 11911 | -0.4831235 | 0.49581123 | 0.08136234  | 0.00895   | 0.2064949  | 0.717599009 |
| HSF90A1 | NL05348_3d101r_R  | ACCTAAAAGGCTTGTGTGGTATTATCTCTTGATATCAATCAACCAACACAGCCGG | HL52660  | 2184  | 0.0097375  | 0.6511796  | 0.08461205  | 2.0009    | 0.4650057  | 0.00786465  |
| HSF90A1 | NL05348_3d101r_R  | ACCTAAAAGGCTTGTGTGGTATTATCTCTTGATATCAATCAACCAACACAGCCGG | HL52660  | 7570  | 0.0438735  | 0.70388737 | 0.084861205 | 1.749     | 2.3072311  | 0.07243556  |
| HSF90A1 | NL05348_3d101r_R  | ACCTAAAAGGCTTGTGTGGTATTATCTCTTGATATCAATCAACCAACACAGCCGG | HL52660  | 12946 | 0.0097375  | 0.6511796  | 0.08461205  | 2.0009    | 0.4650057  | 0.00786465  |
| HSF90A1 | NL05348_3d101r_R  | ACCTAAAAGGCTTGTGTGGTATTATCTCTTGATATCAATCAACCAACACAGCCGG | HL52660  | 7576  | -0.8779125 | 0.68009059 | 0.02836414  | -0.0656   | 0.3993568  | 0.7666756   |
| HSF90A1 | NL05348_3d101r_R  | ACCTAAAAGGCTTGTGTGGTATTATCTCTTGATATCAATCAACCAACACAGCCGG | HL52660  | 11908 | -0.7373175 | 0.78807473 | 0.06829102  | 0.1145    | 0.4036431  | 0.497791538 |
| HSF90A1 | NL05348_3d101r_R  | ACCTAAAAGGCTTGTGTGGTATTATCTCTTGATATCAATCAACCAACACAGCCGG | HL52660  | 1157  | 0.8920375  | 0.4325893  | 0.00970608  | 0.04875   | 0.4767855  | 0.8312046   |
| HSF90A1 | NL05348_3d101r_R  | ACCTAAAAGGCTTGTGTGGTATTATCTCTTGATATCAATCAACCAACACAGCCGG | HL52660  | 6532  | 0.49285    | 0.3118993  | 0.00970608  | 0.0023    | 0.4592997  | 0.9984640   |
| HSF90A1 | NL05348_3d101r_R  | ACCTAAAAGGCTTGTGTGGTATTATCTCTTGATATCAATCAACCAACACAGCCGG | HL52660  | 11909 | 0.8407625  | 0.36909693 | 0.08200653  | 0.03885   | 0.4302959  | 0.87961063  |
| HSF90A1 | NL05348_3d101r_R  | ACCTAAAAGGCTTGTGTGGTATTATCTCTTGATATCAATCAACCAACACAGCCGG | HL52660  | 1019  | -1.369626  | 0.19623497 | 0.00000988  | -0.04785  | 0.5843937  | 0.00310964  |
| HSF90B1 | NL03299_3d174r_R  | ACCTAAAAGGCTTGTGTGGTATTATCTCTTGATATCAATCAACCAACACAGCCGG | HL19274  | 6395  | 1.3052635  | 0.22097184 | 0.000181402 | -0.048785 | 0.5691309  | 0.8945823   |
| HSF90B1 | NL03299_3d174r_R  | ACCTAAAAGGCTTGTGTGGTATTATCTCTTGATATCAATCAACCAACACAGCCGG | HL19274  | 11721 | 0.0021235  | 0.8942876  | 0.000181402 | 0.0021235 | 0.8942876  | 0.000181402 |
| HSF90B1 | NL03299_3d174r_R  | ACCTAAAAGGCTTGTGTGGTATTATCTCTTGATATCAATCAACCAACACAGCCGG | HL19274  | 1018  | 0.9243735  | 0.19589369 | 0.00878907  | 0.609125  | 0.4851538  | 0.05312137  |
| HSF90B1 | NL03299_3d174r_R  | ACCTAAAAGGCTTGTGTGGTATTATCTCTTGATATCAATCAACCAACACAGCCGG | HL19274  | 6394  | 1.0671825  | 0.22097184 | 0.000181402 | 0.0021235 | 0.8942876  | 0.000181402 |
| HSF90B1 | NL03299_3d174r_R  | ACCTAAAAGGCTTGTGTGGTATTATCTCTTGATATCAATCAACCAACACAGCCGG | HL19274  | 11770 | 1.0687975  | 0.25253514 | 0.00072752  | -0.48497  | 0.5217659  | 0.00527659  |
| HSF90B1 | NL03299_3d068r_R  | ACCTAAAAGGCTTGTGTGGTATTATCTCTTGATATCAATCAACCAACACAGCCGG | HL19274  | 12803 |            |            |             | 0.54355   | 0.3181568  | 0.04215084  |
| HSF90B1 | NL03299_3d068r_R  | ACCTAAAAGGCTTGTGTGGTATTATCTCTTGATATCAATCAACCAACACAGCCGG | HL19274  | 4182  | -0.3665375 | 0.14854155 | 0.004677004 | -0.12775  | 0.4619256  | 0.00000000  |
| HSF90B1 | NL03299_3d068r_R  | ACCTAAAAGGCTTGTGTGGTATTATCTCTTGATATCAATCAACCAACACAGCCGG | HL19274  | 4182  | -0.3665375 | 0.14854155 | 0.004677004 | -0.12775  | 0.4619256  | 0.00000000  |
| HSF90B1 | NL03299_3d068r_R  | ACCTAAAAGGCTTGTGTGGTATTATCTCTTGATATCAATCAACCAACACAGCCGG | HL19274  | 4182  | -0.3665375 | 0.14854155 | 0.004677004 | -0.12775  | 0.4619256  | 0.00000000  |
| HSF90B1 | NL03299_3d068r_R  | ACCTAAAAGGCTTGTGTGGTATTATCTCTTGATATCAATCAACCAACACAGCCGG | HL19274  | 4182  | -0.3665375 | 0.14854155 | 0.004677004 | -0.12775  | 0.4619256  | 0.00000000  |
| HSF90B1 | NL03299_3d068r_R  | ACCTAAAAGGCTTGTGTGGTATTATCTCTTGATATCAATCAACCAACACAGCCGG | HL19274  | 4182  | -0.3665375 | 0.14854155 | 0.004677004 | -0.12775  | 0.4619256  | 0.00000000  |
| HSF90B1 | NL03299_3d068r_R  | ACCTAAAAGGCTTGTGTGGTATTATCTCTTGATATCAATCAACCAACACAGCCGG | HL19274  | 4182  | -0.3665375 | 0.14854155 | 0.004677004 | -0.12775  | 0.4619256  | 0.00000000  |
| HSF90B1 | NL03299_3d068r_R  | ACCTAAAAGGCTTGTGTGGTATTATCTCTTGATATCAATCAACCAACACAGCCGG | HL19274  | 4182  | -0.3665375 | 0.14854155 | 0.004677004 | -0.12775  | 0.4619256  | 0.00000000  |
| HSF90B1 | NL03299_3d068r_R  | ACCTAAAAGGCTTGTGTGGTATTATCTCTTGATATCAATCAACCAACACAGCCGG | HL19274  | 4182  | -0.3665375 | 0.14854155 | 0.004677004 | -0.12775  | 0.4619256  | 0.00000000  |
| HSF90B1 | NL03299_3d068r_R  | ACCTAAAAGGCTTGTGTGGTATTATCTCTTGATATCAATCAACCAACACAGCCGG | HL19274  | 4182  | -0.3665375 | 0.14854155 | 0.004677004 | -0.12775  | 0.4619256  | 0.00000000  |
| HSF90B1 | NL03299_3d068r_R  | ACCTAAAAGGCTTGTGTGGTATTATCTCTTGATATCAATCAACCAACACAGCCGG | HL19274  | 4182  | -0.3665375 | 0.14854155 | 0.004677004 | -0.12775  | 0.4619256  | 0.00000000  |
| HSF90B1 | NL03299_3d068r_R  | ACCTAAAAGGCTTGTGTGGTATTATCTCTTGATATCAATCAACCAACACAGCCGG | HL19274  | 4182  | -0.3665375 | 0.14854155 | 0.004677004 | -0.12775  | 0.4619256  | 0.00000000  |
| HSF90B1 | NL03299_3d068r_R  | ACCTAAAAGGCTTGTGTGGTATTATCTCTTGATATCAATCAACCAACACAGCCGG | HL19274  | 4182  | -0.3665375 | 0.14854155 | 0.004677004 | -0.12775  | 0.4619256  | 0.00000000  |
| HSF90B1 | NL03299_3d068r_R  | ACCTAAAAGGCTTGTGTGGTATTATCTCTTGATATCAATCAACCAACACAGCCGG | HL19274  | 4182  | -0.3665375 | 0.14854155 | 0.004677004 | -0.12775  | 0.4619256  | 0.00000000  |
| HSF90B1 | NL03299_3d068r_R  | ACCTAAAAGGCTTGTGTGGTATTATCTCTTGATATCAATCAACCAACACAGCCGG | HL19274  | 4182  | -0.3665375 | 0.14854155 | 0.004677004 | -0.12775  | 0.4619256  | 0.00000000  |
| HSF90B1 | NL03299_3d068r_R  | ACCTAAAAGGCTTGTGTGGTATTATCTCTTGATATCAATCAACCAACACAGCCGG | HL19274  | 4182  | -0.        |            |             |           |            |             |







|       |                    |                                                        |          |        |            |           |             |            |            |             |             |            |             |
|-------|--------------------|--------------------------------------------------------|----------|--------|------------|-----------|-------------|------------|------------|-------------|-------------|------------|-------------|
| ITP8B | A1242780_362355_R  | ACCTAAAAGAGGAGGATCTACACAGAGATCTTGTAATCTTGTTGATCTCTCCGG | HL52887  | 4937   | 2.216425   | 1.2488213 | 0.06651078  | 0.0387125  | 0.7746662  | 0.045201784 |             |            |             |
| ITP8B | A1242780_362355_R  | ACCTAAAAGAGGAGGATCTACACAGAGATCTTGTAATCTTGTTGATCTCTCCGG | HL52887  | 1033   | 1.538025   | 0.9025759 | 0.06651078  | 0.0387125  | 0.7746662  | 0.045201784 |             |            |             |
| ITP8B | A1242780_362355_R  | ACCTAAAAGAGGAGGATCTACACAGAGATCTTGTAATCTTGTTGATCTCTCCGG | HL52887  | 1589   | 1.6943875  | 0.7759884 | 0.0634758   | 1.0865     | 0.0000000  | 0.0000000   |             |            |             |
| ITP8B | A1242780_362355_R  | ACCTAAAAGAGGAGGATCTACACAGAGATCTTGTAATCTTGTTGATCTCTCCGG | HL52887  | 1683   | 0.8115275  | 0.4702629 | 0.06651078  | 0.0387125  | 0.7746662  | 0.045201784 |             |            |             |
| ITP8B | A1242780_362355_R  | ACCTAAAAGAGGAGGATCTACACAGAGATCTTGTAATCTTGTTGATCTCTCCGG | HL52887  | 1039   | 0.0510095  | 0.4320219 | 0.05977662  | 0.4648282  | 0.63702851 | 0.06283156  |             |            |             |
| ITP8B | A1242780_362727_R  | ACCTAAAAGGCAAAATGTGGATGTGATGCTTGATCGATCTCCACATCCGGGG   | HL52887  | 1585   | -0.5019997 | 0.7911346 | 0.19749708  | -0.3555    | 1.5880405  | 0.67402711  |             |            |             |
| ITP8B | A1242780_362727_R  | ACCTAAAAGGCAAAATGTGGATGTGATGCTTGATCGATCTCCACATCCGGGG   | HL52887  | 4935   | -0.3357375 | 0.2328954 | 0.08793964  | -0.2029375 | 0.7627879  | 0.874492574 |             |            |             |
| ITP8B | A1242780_362675_R  | ACCTAAAAGAGGAGGATCTACACAGAGATCTTGTAATCTTGTTGATCTCTCCGG | HL52887  | 10311  | -0.3426125 | 0.0746283 | 0.04814466  | -0.4213875 | 0.7549487  | 0.26877941  |             |            |             |
| ITP8B | A1242780_362675_R  | ACCTAAAAGAGGAGGATCTACACAGAGATCTTGTAATCTTGTTGATCTCTCCGG | HL52887  | 15867  | 0.0004625  | 0.1526941 | 0.06651078  | 0.0387125  | 0.7746662  | 0.045201784 |             |            |             |
| ITP8B | BX137724_361709_R  | ACCTAAAAGAGGAGGATCTACACAGAGATCTTGTAATCTTGTTGATCTCTCCGG | HL11905  | 4686   | -0.4046725 | 0.1138942 | 0.02730751  | 0.4071125  | 0.1571593  | 0.50140081  |             |            |             |
| ITP8B | BX137724_361709_R  | ACCTAAAAGAGGAGGATCTACACAGAGATCTTGTAATCTTGTTGATCTCTCCGG | HL11905  | 10067  | 0.12725    | 0.0000000 | 0.0000000   | 0.0000000  | 0.0000000  | 0.0000000   |             |            |             |
| ITP8B | BX137724_361709_R  | ACCTAAAAGAGGAGGATCTACACAGAGATCTTGTAATCTTGTTGATCTCTCCGG | HL11905  | 15438  | 0.0124875  | 0.2883166 | 0.04452791  | 0.3945125  | 0.1469278  | 0.04082311  |             |            |             |
| ITP8B | BX137724_361709_R  | ACCTAAAAGGCAATCTCCAGTATCTTGTAATCTTGTTGATCTCTCCGG       | HL11905  | 4684   | -0.0824875 | 0.2094264 | 0.46955284  | -0.0738375 | 0.3027627  | 0.496825708 |             |            |             |
| ITP8B | BX137724_361709_R  | ACCTAAAAGGCAATCTCCAGTATCTTGTAATCTTGTTGATCTCTCCGG       | HL11905  | 10060  | 0.1044875  | 0.1722851 | 0.03116166  | 0.0000000  | 0.0000000  | 0.0000000   |             |            |             |
| ITP8B | BX137724_361709_R  | ACCTAAAAGGCAATCTCCAGTATCTTGTAATCTTGTTGATCTCTCCGG       | HL11905  | 15436  | 0.1151215  | 0.0970374 | 0.43029296  | 0.0138785  | 0.2750164  | 0.914649876 |             |            |             |
| ITP8B | NM_002227_361642_R | ACCTAAAAGGAGGATCTACACAGAGATCTTGTAATCTTGTTGATCTCTCCGG   | HL207358 | 1683   | 4.0885     | 1.1565437 | 0.00411963  | 0.1178075  | 0.3647861  | 0.479090697 |             |            |             |
| ITP8B | NM_002227_361642_R | ACCTAAAAGGAGGATCTACACAGAGATCTTGTAATCTTGTTGATCTCTCCGG   | HL207358 | 7059   | 3.91185    | 1.3085011 | 0.06652389  | 0.0000000  | 0.0000000  | 0.0000000   |             |            |             |
| ITP8B | NM_002227_361642_R | ACCTAAAAGGAGGATCTACACAGAGATCTTGTAATCTTGTTGATCTCTCCGG   | HL207358 | 12435  | 3.70175    | 0.9940133 | 0.00416331  | 0.0000000  | 0.0000000  | 0.0000000   |             |            |             |
| ITP8B | NM_002227_361642_R | ACCTAAAAGGAGGATCTACACAGAGATCTTGTAATCTTGTTGATCTCTCCGG   | HL207358 | 1685   | 0.024      | 0.2034491 | 0.95488804  | 0.0271625  | 0.5333887  | 0.0175435   |             |            |             |
| ITP8B | NM_002227_361642_R | ACCTAAAAGGAGGATCTACACAGAGATCTTGTAATCTTGTTGATCTCTCCGG   | HL207358 | 781    | 0.016      | 0.3977008 | 0.71885129  | 0.8147875  | 0.5483854  | 0.0226005   |             |            |             |
| ITP8B | NM_002227_361642_R | ACCTAAAAGGAGGATCTACACAGAGATCTTGTAATCTTGTTGATCTCTCCGG   | HL207358 | 12437  | 0.016      | 0.5456    | 0.0000000   | 0.0000000  | 0.0000000  | 0.0000000   |             |            |             |
| ITP8B | NM_002227_362233_R | ACCTAAAAGGCAATCTCCAGTATCTTGTAATCTTGTTGATCTCTCCGG       | HL207358 | 550    | 0.024      | 0.2034491 | 0.95488804  | 0.0271625  | 0.5333887  | 0.0175435   |             |            |             |
| ITP8B | NM_002227_362233_R | ACCTAAAAGGCAATCTCCAGTATCTTGTAATCTTGTTGATCTCTCCGG       | HL207358 | 1086   | 0.016      | 0.3977008 | 0.71885129  | 0.8147875  | 0.5483854  | 0.0226005   |             |            |             |
| ITP8B | NM_002227_362233_R | ACCTAAAAGGCAATCTCCAGTATCTTGTAATCTTGTTGATCTCTCCGG       | HL207358 | 144    | 0.5456     | 0.0000000 | 0.0000000   | 0.0000000  | 0.0000000  | 0.0000000   |             |            |             |
| ITP8B | NM_004972_361183_R | ACCTAAAAGGCAATCTCCAGTATCTTGTAATCTTGTTGATCTCTCCGG       | HL59181  | 25     | 0.2703303  | 0.5173030 | 0.31732453  | 0.2534875  | 0.2581131  | 0.228442607 |             |            |             |
| ITP8B | NM_004972_361183_R | ACCTAAAAGGCAATCTCCAGTATCTTGTAATCTTGTTGATCTCTCCGG       | HL59181  | 5401   | 0.3112333  | 0.5110585 | 0.30003524  | 0.3087125  | 0.2361556  | 0.11899784  |             |            |             |
| ITP8B | NM_004972_361183_R | ACCTAAAAGGCAATCTCCAGTATCTTGTAATCTTGTTGATCTCTCCGG       | HL59181  | 10777  | 0.19355    | 0.4741175 | 0.45494769  | 0.4542625  | 0.1551304  | 0.03313257  |             |            |             |
| ITP8B | NM_004972_361183_R | ACCTAAAAGGCAATCTCCAGTATCTTGTAATCTTGTTGATCTCTCCGG       | HL59181  | 144374 | 26         | 0.3110035 | 0.4540155   | 0.21281839 | 0.1219125  | 0.13183761  | 0.427259564 |            |             |
| ITP8B | NM_004972_361183_R | ACCTAAAAGGCAATCTCCAGTATCTTGTAATCTTGTTGATCTCTCCGG       | HL59181  | 2482   | 0.37475    | 0.5092525 | 0.17091088  | 0.1893375  | 0.1220448  | 0.24437651  |             |            |             |
| ITP8B | NM_004972_361183_R | ACCTAAAAGGCAATCTCCAGTATCTTGTAATCTTGTTGATCTCTCCGG       | HL59181  | 10778  | 0.0000000  | 0.5066747 | 0.15599618  | 0.1711215  | 0.1123602  | 0.25684088  |             |            |             |
| ITP8B | NM_004972_361183_R | ACCTAAAAGGCAATCTCCAGTATCTTGTAATCTTGTTGATCTCTCCGG       | HL59181  | 27     | 1.5657333  | 0.3358122 | 0.00462752  | 0.3813875  | 0.1977158  | 0.0959642   |             |            |             |
| ITP8B | NM_004972_361183_R | ACCTAAAAGGCAATCTCCAGTATCTTGTAATCTTGTTGATCTCTCCGG       | HL59181  | 10779  | 1.7096233  | 0.4466242 | 0.80023381  | 0.007125   | 0.1137131  | 0.02809066  |             |            |             |
| ITP8B | NM_004972_361183_R | ACCTAAAAGGCAATCTCCAGTATCTTGTAATCTTGTTGATCTCTCCGG       | HL59181  | 5403   | 1.4941     | 0.0000000 | 0.0000000   | 0.4593875  | 0.2452485  | 0.0420914   |             |            |             |
| ITP8B | NM_004972_361183_R | ACCTAAAAGGCAATCTCCAGTATCTTGTAATCTTGTTGATCTCTCCGG       | HL59181  | 100    | 0.0000000  | 0.0000000 | 0.0000000   | -0.1711667 | 1.2090951  | 0.81843245  |             |            |             |
| ITP8B | NM_000215_361021_R | ACCTAAAAGGCAATCTCCAGTATCTTGTAATCTTGTTGATCTCTCCGG       | HL51247  | 5476   | 0.0000000  | 0.0000000 | 0.0000000   | -0.1469    | 1.6738617  | 0.86612793  |             |            |             |
| ITP8B | NM_000215_361021_R | ACCTAAAAGGCAATCTCCAGTATCTTGTAATCTTGTTGATCTCTCCGG       | HL51247  | 1082   | 0.0000000  | 0.0000000 | 0.0000000   | 0.0000000  | 0.0000000  | 0.0000000   |             |            |             |
| ITP8B | NM_000215_361021_R | ACCTAAAAGGCAATCTCCAGTATCTTGTAATCTTGTTGATCTCTCCGG       | HL51247  | 101    | 1.3238     | 0.0000000 | 0.0000000   | 0.1447375  | 0.7337559  | 0.67766785  |             |            |             |
| ITP8B | NM_000215_361021_R | ACCTAAAAGGCAATCTCCAGTATCTTGTAATCTTGTTGATCTCTCCGG       | HL51247  | 5477   | 1.4235     | 0.0000000 | 0.0000000   | 0.3716833  | 0.0388972  | 0.1318062   |             |            |             |
| ITP8B | NM_000215_361021_R | ACCTAAAAGGCAATCTCCAGTATCTTGTAATCTTGTTGATCTCTCCGG       | HL51247  | 1083   | 0.4463133  | 0.9059815 | 0.35348324  | 0.0041625  | 0.8149014  | 0.00213852  |             |            |             |
| ITP8B | NM_000215_361021_R | ACCTAAAAGGCAATCTCCAGTATCTTGTAATCTTGTTGATCTCTCCGG       | HL51247  | 102    | -0.8099    | 0.1366610 | 0.00778028  | -0.1430375 | 0.0941028  | 0.34177748  |             |            |             |
| ITP8B | NM_000215_361021_R | ACCTAAAAGGCAATCTCCAGTATCTTGTAATCTTGTTGATCTCTCCGG       | HL51247  | 5478   | 0.211      | 0.3683899 | 0.00899778  | 0.0000000  | 0.0000000  | 0.0000000   |             |            |             |
| ITP8B | NM_000215_361021_R | ACCTAAAAGGCAATCTCCAGTATCTTGTAATCTTGTTGATCTCTCCGG       | HL51247  | 10854  | -0.7918    | 0.3828335 | 0.0096338   | -0.1804375 | 0.1839642  | 0.28934588  |             |            |             |
| ITP8B | NM_000215_361021_R | ACCTAAAAGGCAATCTCCAGTATCTTGTAATCTTGTTGATCTCTCCGG       | HL51247  | 4654   | -0.397     | 0.4542438 | 0.0000000   | -0.0000000 | 0.0000000  | 0.0000000   |             |            |             |
| ITP8B | NM_000215_361021_R | ACCTAAAAGGCAATCTCCAGTATCTTGTAATCTTGTTGATCTCTCCGG       | HL51247  | 9840   | -0.1928    | 0.5653632 | 0.4819549   | -0.056     | 0.1662461  | 0.07101061  | 0.64382363  |            |             |
| ITP8B | NM_000215_361021_R | ACCTAAAAGGCAATCTCCAGTATCTTGTAATCTTGTTGATCTCTCCGG       | HL51247  | 102    | -0.27728   | 0.1444783 | 0.0000000   | -0.1167    | 0.5022399  | 0.76762029  | 0.58666867  |            |             |
| ITP8B | NM_000215_361021_R | ACCTAAAAGGCAATCTCCAGTATCTTGTAATCTTGTTGATCTCTCCGG       | HL51247  | 4652   | 0.50025    | 0.2506952 | 0.90267808  | 0.0000000  | 0.0000000  | 0.0000000   |             |            |             |
| ITP8B | NM_000215_361021_R | ACCTAAAAGGCAATCTCCAGTATCTTGTAATCTTGTTGATCTCTCCGG       | HL51247  | 9838   | -0.04265   | 0.4503885 | 0.03100914  | -0.48075   | 0.5211354  | 0.11693505  | -0.1674667  | 0.6065154  | 0.61905462  |
| ITP8B | NM_000215_361021_R | ACCTAAAAGGCAATCTCCAGTATCTTGTAATCTTGTTGATCTCTCCGG       | HL51247  | 872    | -0.1145    | 0.8412666 | 0.0000000   | -0.9332333 | 0.4809788  | 0.0000000   | 0.0000000   | 0.0000000  | 0.0000000   |
| ITP8B | NM_000215_361021_R | ACCTAAAAGGCAATCTCCAGTATCTTGTAATCTTGTTGATCTCTCCGG       | HL51247  | 4435   | 1.8435667  | 0.2447469 | 0.16587311  | 1.015175   | 0.9618154  | 0.06037867  | 0.00873333  | 0.15693493 | 0.11548141  |
| ITP8B | NM_000215_361021_R | ACCTAAAAGGCAATCTCCAGTATCTTGTAATCTTGTTGATCTCTCCGG       | HL51247  | 15187  | -0.14925   | 0.1344655 | 0.0000000   | -0.0000000 | 0.0000000  | 0.0000000   | 0.0000000   | 0.0000000  | 0.0000000   |
| ITP8B | NM_000215_361021_R | ACCTAAAAGGCAATCTCCAGTATCTTGTAATCTTGTTGATCTCTCCGG       | HL51247  | 9811   | 3.6173     | 4.4010261 | 0.13889719  | 1.00065    | 0.5062175  | 0.0726488   | 0.0000000   | 0.0000000  | 0.0000000   |
| ITP8B | NM_000215_361021_R | ACCTAAAAGGCAATCTCCAGTATCTTGTAATCTTGTTGATCTCTCCGG       | HL51247  | 4439   | 0.1999     | 0.9000289 | 0.0000000   | 0.0000000  | 0.0000000  | 0.0000000   | 0.0000000   | 0.0000000  | 0.0000000   |
| ITP8B | NM_000215_361021_R | ACCTAAAAGGCAATCTCCAGTATCTTGTAATCTTGTTGATCTCTCCGG       | HL51247  | 9815   | 0.7777     | 1.0623131 | 0.11349102  | 0.18025    | 0.3911662  | 0.0132805   | 0.4298      | 0.28819157 | 0.01819968  |
| ITP8B | NM_000215_361021_R | ACCTAAAAGGCAATCTCCAGTATCTTGTAATCTTGTTGATCTCTCCGG       | HL51247  | 1025   | -0.55475   | 0.1318682 | 0.0000000   | -0.55475   | 0.1318682  | 0.0000000   | 0.0000000   | 0.0000000  | 0.0000000   |
| ITP8B | NM_000215_361021_R | ACCTAAAAGGCAATCTCCAGTATCTTGTAATCTTGTTGATCTCTCCGG       | HL51247  | 4437   | -0.3792467 | 0.1457345 | 0.11663667  | -0.1166367 | 0.1457345  | 0.3049778   | -0.4235661  | 0.5517956  | 0.21916355  |
| ITP8B | NM_000215_361021_R | ACCTAAAAGGCAATCTCCAGTATCTTGTAATCTTGTTGATCTCTCCGG       | HL51247  | 9813   | -0.5425    | 0.1921047 | 0.11642899  | -1.37065   | 0.1537979  | 0.000111974 | -0.4193333  | 0.7204103  | 0.15442223  |
| ITP8B | NM_000215_361021_R | ACCTAAAAGGCAATCTCCAGTATCTTGTAATCTTGTTGATCTCTCCGG       | HL51247  | 11     | 0.134478   | 0.8669913 | 0.72309803  | 0.2626467  | 0.4621149  | 0.3044976   | 0.0000000   | 0.0000000  | 0.0000000   |
| ITP8B | NM_002228_361111_R | ACCTAAAAGGCAATCTCCAGTATCTTGTAATCTTGTTGATCTCTCCGG       | HL52704  | 1148   | 1.6423875  | 0.7847181 | 0.00010872  | 0.0000000  | 0.0000000  | 0.0000000   | 0.0000000   | 0.0000000  | 0.0000000   |
| ITP8B | NM_002228_361111_R | ACCTAAAAGGCAATCTCCAGTATCTTGTAATCTTGTTGATCTCTCCGG       | HL52704  | 6524   | 0.192125   | 1.1995043 | 0.0000000   | 0.0000000  | 0.0000000  | 0.0000000   | 0.0000000   | 0.0000000  | 0.0000000   |
| ITP8B | NM_002228_361111_R | ACCTAAAAGGCAATCTCCAGTATCTTGTAATCTTGTTGATCTCTCCGG       | HL52704  | 11900  | 3.9601125  | 0.1151847 | 0.0000000   | 0.0000000  | 0.0000000  | 0.0000000   | 0.0000000   | 0.0000000  | 0.0000000   |
| ITP8B | NM_002228_361111_R | ACCTAAAAGGCAATCTCCAGTATCTTGTAATCTTGTTGATCTCTCCGG       | HL52704  | 2144   | -0.0000000 | 0.0000000 | 0.0000000   | 0.0000000  | 0.0000000  | 0.0000000   | 0.0000000   | 0.0000000  | 0.0000000   |
| ITP8B | NM_002228_361111_R | ACCTAAAAGGCAATCTCCAGTATCTTGTAATCTTGTTGATCTCTCCGG       | HL52704  | 7520   | -0.187465  | 0.3070973 | 0.25612157  | -0.0000000 | 0.0000000  | 0.0000000   | 0.0000000   | 0.0000000  | 0.0000000   |
| ITP8B | NM_002228_361111_R | ACCTAAAAGGCAATCTCCAGTATCTTGTAATCTTGTTGATCTCTCCGG       | HL52704  | 12896  | -0.1198833 | 0.3527109 | 0.52712512  | -0.4492875 | 0.3228859  | 0.1078946   | -0.92725    | 0.3228859  | 0.1078946   |
| ITP8B | NM_002228_361111_R | ACCTAAAAGGCAATCTCCAGTATCTTGTAATCTTGTTGATCTCTCCGG       | HL52704  | 2146   | 4.4818     | 0.0647268 | 0.000129124 | 1.808      | 0.814989   | 0.0118014   | 0.0000000   | 0.0000000  | 0.0000000   |
| ITP8B | NM_002228_361111_R | ACCTAAAAGGCAATCTCCAGTATCTTGTAATCTTGTTGATCTCTCCGG       | HL52704  | 7522   | 2.4129     | 0.1055268 | 0.000157019 | 0.188615   | 0.9751996  | 0.01482154  | 0.0000000   | 0.0000000  | 0.0000000   |
| ITP8B | NM_002228_361111_R | ACCTAAAAGGCAATCTCCAGTATCTTGTAATCTTGTTGATCTCTCCGG       | HL52704  | 12888  | 2.7564667  | 0.0000000 | 0.0000000   | 0.0000000  | 0.0000000  | 0.0000000   | 0.0000000   | 0.0000000  | 0.0000000   |
| ITP8B | NM_002228_361111_R | ACCTAAAAGGCAATCTCCAGTATCTTGTAATCTTGTTGATCTCTCCGG       | HL5292   | 1146   | 1.0208375  | 0.3328966 | 0.02975305  | 0.0000000  | 0.0000000  | 0.0000000   | -0.7765     | 0.13159661 | 0.007704295 |
| ITP8B | NM_002228_361111_R | ACCTAAAAGGCAATCTCCAGTATCTTGTAATCTTGTTGATCTCTCCGG       | HL5292   | 6522   | 0.0000000  | 0.0       |             |            |            |             |             |            |             |



|       |                    |                                                           |          |       |              |            |             |            |            |             |
|-------|--------------------|-----------------------------------------------------------|----------|-------|--------------|------------|-------------|------------|------------|-------------|
| KCMRG | NM_173605_16812_R  | ACCTAAAGAGGAGGAGTGGTTCCTAATCTCTGATTAATGAAACACACTGACCTGGC  | HL508055 | 10424 | 1.1253625    | 0.08254017 | 0.00037352  | -0.0550375 | 0.47637357 | 0.82296245  |
| KCMRG | NM_173605_16812_R  | ACCTAAAGAGGAGGAGTGGTTCCTAATCTCTGATTAATGAAACACACTGACCTGGC  | HL508055 | 10424 | 1.232212613  | 0.17624281 | 0.00037352  | -0.0550375 | 0.47637357 | 0.82296245  |
| KCMRG | NM_173605_16874_R  | ACCTAAAAGAGGAGGAGTGGTTCCTAATCTCTGATTAATGAAACACACTGACCTGGC | HL508055 | 5050  | -0.5578675   | 0.4658558  | 0.05330069  | 0.7461125  | 0.6942737  | 0.06746492  |
| KCMRG | NM_173605_16874_R  | ACCTAAAAGAGGAGGAGTGGTTCCTAATCTCTGATTAATGAAACACACTGACCTGGC | HL508055 | 5050  | -0.3341175   | 0.4658558  | 0.05330069  | 0.7461125  | 0.6942737  | 0.06746492  |
| KCMRG | NM_173605_16874_R  | ACCTAAAAGAGGAGGAGTGGTTCCTAATCTCTGATTAATGAAACACACTGACCTGGC | HL508055 | 15802 | -0.3341175   | 0.4658558  | 0.05330069  | 0.7461125  | 0.6942737  | 0.06746492  |
| KCMRG | NM_173605_16874_R  | ACCTAAAAGAGGAGGAGTGGTTCCTAATCTCTGATTAATGAAACACACTGACCTGGC | HL508055 | 15802 | -0.3341175   | 0.4658558  | 0.05330069  | 0.7461125  | 0.6942737  | 0.06746492  |
| KCMRG | NM_173605_16874_R  | ACCTAAAAGAGGAGGAGTGGTTCCTAATCTCTGATTAATGAAACACACTGACCTGGC | HL508055 | 5052  | -0.2740875   | 0.2602120  | 0.15501577  | -0.5899265 | 0.3744791  | 0.30639571  |
| KCMRG | NM_173605_16874_R  | ACCTAAAAGAGGAGGAGTGGTTCCTAATCTCTGATTAATGAAACACACTGACCTGGC | HL508055 | 10428 | -0.2543875   | 0.2914971  | 0.19799758  | -0.3738875 | 0.4281808  | 0.41986113  |
| KCMRG | NM_173605_16996_R  | ACCTAAAAGAGGAGGAGTGGTTCCTAATCTCTGATTAATGAAACACACTGACCTGGC | HL508055 | 15804 | -0.2318735   | 0.2439647  | 0.20716108  | -0.5556265 | 0.2320387  | 0.05184215  |
| KCTD7 | NM_153033_16468_R  | ACCTAAAAGAGGAGGAGTGGTTCCTAATCTCTGATTAATGAAACACACTGACCTGGC | HL508055 | 5207  | -0.533336647 | 0.9203841  | 0.00037352  | -0.0550375 | 0.47637357 | 0.82296245  |
| KCTD7 | NM_153033_16468_R  | ACCTAAAAGAGGAGGAGTGGTTCCTAATCTCTGATTAATGAAACACACTGACCTGGC | HL508055 | 10583 | -0.8400215   | 0.9203841  | 0.00037352  | -0.0550375 | 0.47637357 | 0.82296245  |
| KCTD7 | NM_153033_16468_R  | ACCTAAAAGAGGAGGAGTGGTTCCTAATCTCTGATTAATGAAACACACTGACCTGGC | HL508055 | 15809 | -0.54929     | 0.9392007  | 0.0031502   | -0.4573875 | 0.9079515  | 0.302144935 |
| KCTD7 | NM_153033_16468_R  | ACCTAAAAGAGGAGGAGTGGTTCCTAATCTCTGATTAATGAAACACACTGACCTGGC | HL508055 | 5205  | -0.4329125   | 1.1662479  | 0.2490971   | 0.3640125  | 0.4411608  | 0.16785158  |
| KCTD7 | NM_153033_16494_R  | ACCTAAAAGAGGAGGAGTGGTTCCTAATCTCTGATTAATGAAACACACTGACCTGGC | HL508055 | 10581 | -0.8848175   | 0.2302372  | 0.48819206  | 0.4562625  | 0.64409186 | 0.109425069 |
| KCTD7 | NM_153033_16494_R  | ACCTAAAAGAGGAGGAGTGGTTCCTAATCTCTGATTAATGAAACACACTGACCTGGC | HL508055 | 15927 | 1.2321215    | 2.4995210  | 0.2979369   | 0.8596875  | 0.44809314 | 0.01480594  |
| KDR   | NM_002253_160771_R | ACCTAAAAGAGGAGGAGTGGTTCCTAATCTCTGATTAATGAAACACACTGACCTGGC | HL479756 | 157   | 0.879075     | 0.8917398  | 0.06307258  | 0.0257325  | 0.7217356  | 0.939673604 |
| KDR   | NM_002253_160771_R | ACCTAAAAGAGGAGGAGTGGTTCCTAATCTCTGATTAATGAAACACACTGACCTGGC | HL479756 | 5333  | 0.2004       | 0.9118825  | 0.05700051  | -0.0214626 | 0.7482945  | 0.62236852  |
| KDR   | NM_002253_160480_R | ACCTAAAAGAGGAGGAGTGGTTCCTAATCTCTGATTAATGAAACACACTGACCTGGC | HL479756 | 10909 | 0.979125     | 0.85284615 | 0.03907144  | 0.0492375  | 0.7282003  | 0.885840001 |
| KDR   | NM_002253_160480_R | ACCTAAAAGAGGAGGAGTGGTTCCTAATCTCTGATTAATGAAACACACTGACCTGGC | HL479756 | 158   | 0.54269      | 0.9392007  | 0.0031502   | -0.4573875 | 0.9079515  | 0.302144935 |
| KDR   | NM_002253_160480_R | ACCTAAAAGAGGAGGAGTGGTTCCTAATCTCTGATTAATGAAACACACTGACCTGGC | HL479756 | 5334  | 1.193725     | 0.9356911  | 0.73093971  | -0.4988626 | 0.85450842 | 0.24365704  |
| KDR   | NM_002253_160480_R | ACCTAAAAGAGGAGGAGTGGTTCCTAATCTCTGATTAATGAAACACACTGACCTGGC | HL479756 | 10910 | 0.18429      | 0.9432227  | 0.05547763  | -0.4131212 | 0.8577165  | 0.310499923 |
| KDR   | NM_002253_160480_R | ACCTAAAAGAGGAGGAGTGGTTCCTAATCTCTGATTAATGAAACACACTGACCTGGC | HL479756 | 1687  | -0.68126667  | 0.3672833  | 0.03223385  | -0.4643975 | 0.4046683  | 0.08561577  |
| KDR   | NM_002253_160480_R | ACCTAAAAGAGGAGGAGTGGTTCCTAATCTCTGATTAATGAAACACACTGACCTGGC | HL479756 | 7063  | -0.60893333  | 0.36680843 | 0.04368203  | -0.4833375 | 0.36460543 | 0.06232514  |
| KDR   | NM_002253_160480_R | ACCTAAAAGAGGAGGAGTGGTTCCTAATCTCTGATTAATGAAACACACTGACCTGGC | HL479756 | 12439 | -0.8525      | 0.9203841  | 0.00037352  | -0.0550375 | 0.47637357 | 0.82296245  |
| KDR   | NM_002253_160480_R | ACCTAAAAGAGGAGGAGTGGTTCCTAATCTCTGATTAATGAAACACACTGACCTGGC | HL58831  | 3193  | 1.406275     | 0.6907099  | 0.05112835  | -0.4504375 | 0.3388114  | 0.68079863  |
| KDR   | NM_002253_160480_R | ACCTAAAAGAGGAGGAGTGGTTCCTAATCTCTGATTAATGAAACACACTGACCTGGC | HL58831  | 8569  | 1.435705     | 0.6201205  | 0.00473708  | -0.0550375 | 0.47637357 | 0.82296245  |
| KDR   | NM_002253_160480_R | ACCTAAAAGAGGAGGAGTGGTTCCTAATCTCTGATTAATGAAACACACTGACCTGGC | HL58831  | 13945 | 1.4624       | 0.6510361  | 0.03230866  | -0.0550375 | 0.47637357 | 0.82296245  |
| KDR   | NM_002253_160480_R | ACCTAAAAGAGGAGGAGTGGTTCCTAATCTCTGATTAATGAAACACACTGACCTGGC | HL58831  | 2195  | 1.3036       | 0.2081154  | 0.01404842  | -0.0550375 | 0.47637357 | 0.82296245  |
| KDR   | NM_002253_160480_R | ACCTAAAAGAGGAGGAGTGGTTCCTAATCTCTGATTAATGAAACACACTGACCTGGC | HL58831  | 8751  | 1.23815      | 0.3338208  | 0.00105977  | -0.0550375 | 0.47637357 | 0.82296245  |
| KDR   | NM_002253_160480_R | ACCTAAAAGAGGAGGAGTGGTTCCTAATCTCTGATTAATGAAACACACTGACCTGGC | HL58831  | 13947 | 1.30365      | 0.1633688  | 0.000217403 | -0.0550375 | 0.47637357 | 0.82296245  |
| KDR   | NM_002253_160480_R | ACCTAAAAGAGGAGGAGTGGTTCCTAATCTCTGATTAATGAAACACACTGACCTGGC | HL58831  | 3167  | 1.2784       | 0.2147904  | 0.00242606  | -0.0550375 | 0.47637357 | 0.82296245  |
| KDR   | NM_002253_160480_R | ACCTAAAAGAGGAGGAGTGGTTCCTAATCTCTGATTAATGAAACACACTGACCTGGC | HL58831  | 8543  | 1.312625     | 0.1858316  | 0.000297878 | -0.0550375 | 0.47637357 | 0.82296245  |
| KDR   | NM_002253_160480_R | ACCTAAAAGAGGAGGAGTGGTTCCTAATCTCTGATTAATGAAACACACTGACCTGGC | HL58831  | 13947 | 1.292625     | 0.3882593  | 0.00941212  | -0.0550375 | 0.47637357 | 0.82296245  |
| KDR   | NM_002253_160480_R | ACCTAAAAGAGGAGGAGTGGTTCCTAATCTCTGATTAATGAAACACACTGACCTGGC | HL58831  | 2789  | 2.24645      | 1.2378909  | 0.05053031  | -0.0550375 | 0.47637357 | 0.82296245  |
| KDR   | NM_002253_160480_R | ACCTAAAAGAGGAGGAGTGGTTCCTAATCTCTGATTAATGAAACACACTGACCTGGC | HL58831  | 8165  | 2.098        | 1.1188437  | 0.00456476  | -0.0550375 | 0.47637357 | 0.82296245  |
| KDR   | NM_002253_160480_R | ACCTAAAAGAGGAGGAGTGGTTCCTAATCTCTGATTAATGAAACACACTGACCTGGC | HL58831  | 13541 | 2.2633       | 1.1987196  | 0.00464271  | -0.0550375 | 0.47637357 | 0.82296245  |
| KDR   | NM_002253_160480_R | ACCTAAAAGAGGAGGAGTGGTTCCTAATCTCTGATTAATGAAACACACTGACCTGGC | HL58831  | 2787  | 0.858        | 0.9203841  | 0.00037352  | -0.0550375 | 0.47637357 | 0.82296245  |
| KDR   | NM_002253_160480_R | ACCTAAAAGAGGAGGAGTGGTTCCTAATCTCTGATTAATGAAACACACTGACCTGGC | HL58831  | 8163  | -0.524775    | 0.1299817  | 0.01724871  | -0.0550375 | 0.47637357 | 0.82296245  |
| KDR   | NM_002253_160480_R | ACCTAAAAGAGGAGGAGTGGTTCCTAATCTCTGATTAATGAAACACACTGACCTGGC | HL58831  | 13539 | -0.4543      | 0.2075076  | 0.01474364  | -0.0550375 | 0.47637357 | 0.82296245  |
| KDR   | NM_002253_160480_R | ACCTAAAAGAGGAGGAGTGGTTCCTAATCTCTGATTAATGAAACACACTGACCTGGC | HL58831  | 2785  | 0.38879      | 0.7912468  | 0.46242662  | -0.0550375 | 0.47637357 | 0.82296245  |
| KDR   | NM_002253_160480_R | ACCTAAAAGAGGAGGAGTGGTTCCTAATCTCTGATTAATGAAACACACTGACCTGGC | HL58831  | 8161  | -0.446575    | 0.8217615  | 0.40383827  | -0.0550375 | 0.47637357 | 0.82296245  |
| KDR   | NM_002253_160480_R | ACCTAAAAGAGGAGGAGTGGTTCCTAATCTCTGATTAATGAAACACACTGACCTGGC | HL58831  | 13537 | -0.3955      |            |             | -0.0550375 | 0.47637357 | 0.82296245  |
| KDR   | NM_002253_160480_R | ACCTAAAAGAGGAGGAGTGGTTCCTAATCTCTGATTAATGAAACACACTGACCTGGC | HL47984  | 4532  | 1.138        | 0.7593066  | 0.73392121  | 0.0414     | 0.3350518  | 0.83929619  |
| KDR   | NM_002253_160480_R | ACCTAAAAGAGGAGGAGTGGTTCCTAATCTCTGATTAATGAAACACACTGACCTGGC | HL47984  | 9908  | 0.85275      | 0.9432227  | 0.05547763  | -0.4131212 | 0.8577165  | 0.310499923 |
| KDR   | NM_002253_160480_R | ACCTAAAAGAGGAGGAGTGGTTCCTAATCTCTGATTAATGAAACACACTGACCTGGC | HL47984  | 15284 | 0.64375      | 0.4147279  | 0.00588289  | -0.392921  | 0.7919628  | 0.30444075  |
| KDR   | NM_002253_160480_R | ACCTAAAAGAGGAGGAGTGGTTCCTAATCTCTGATTAATGAAACACACTGACCTGGC | HL47984  | 9504  | 0.118742     | 1.2377871  | -0.20425    | 0.280374   | 0.28291153 | 0.27386667  |
| KDR   | NM_002253_160480_R | ACCTAAAAGAGGAGGAGTGGTTCCTAATCTCTGATTAATGAAACACACTGACCTGGC | HL47984  | 9504  | 0.118742     | 1.2377871  | -0.20425    | 0.280374   | 0.28291153 | 0.27386667  |
| KDR   | NM_002253_160480_R | ACCTAAAAGAGGAGGAGTGGTTCCTAATCTCTGATTAATGAAACACACTGACCTGGC | HL47984  | 15280 | -0.135       | 0.2297168  | 0.49492766  | -0.17626   | 0.4830708  | 0.49791609  |
| KDR   | NM_002253_160480_R | ACCTAAAAGAGGAGGAGTGGTTCCTAATCTCTGATTAATGAAACACACTGACCTGGC | HL47984  | 9508  | -0.14375     | 0.9203841  | 0.00037352  | -0.0550375 | 0.47637357 | 0.82296245  |
| KDR   | NM_002253_160480_R | ACCTAAAAGAGGAGGAGTGGTTCCTAATCTCTGATTAATGAAACACACTGACCTGGC | HL47984  | 9906  | -0.1893      | 0.9208497  | 0.67808558  | -0.48235   | 0.1193107  | 0.70746657  |
| KDR   | NM_002253_160480_R | ACCTAAAAGAGGAGGAGTGGTTCCTAATCTCTGATTAATGAAACACACTGACCTGGC | HL47984  | 15282 | 0.16831533   | 0.7415     | 0.9203841   | 0.00037352 | 0.47637357 | 0.82296245  |
| KDR   | NM_002253_160480_R | ACCTAAAAGAGGAGGAGTGGTTCCTAATCTCTGATTAATGAAACACACTGACCTGGC | HL47984  | 4429  | 0.421025     | 1.0832109  | 0.3888179   | -0.049475  | 0.2034865  | 0.61268208  |
| KDR   | NM_002253_160480_R | ACCTAAAAGAGGAGGAGTGGTTCCTAATCTCTGATTAATGAAACACACTGACCTGGC | HL47984  | 9885  | 0.85275      | 0.9432227  | 0.05547763  | -0.4131212 | 0.8577165  | 0.310499923 |
| KDR   | NM_002253_160480_R | ACCTAAAAGAGGAGGAGTGGTTCCTAATCTCTGATTAATGAAACACACTGACCTGGC | HL47984  | 15181 | 0.64275      | 1.6237025  | 0.5119318   | -0.44905   | 0.3940268  | 0.89056667  |
| KDR   | NM_002253_160480_R | ACCTAAAAGAGGAGGAGTGGTTCCTAATCTCTGATTAATGAAACACACTGACCTGGC | HL47984  | 4423  | -0.49375     | 0.7247011  | 0.9917964   | 0.01165    | 0.2421059  | 0.63388826  |
| KDR   | NM_002253_160480_R | ACCTAAAAGAGGAGGAGTGGTTCCTAATCTCTGATTAATGAAACACACTGACCTGGC | HL47984  | 9809  | 0.18925      | 0.66023529 | 0.05129956  | -0.2584075 | 0.5812529  | -0.1974331  |
| KDR   | NM_002253_160480_R | ACCTAAAAGAGGAGGAGTGGTTCCTAATCTCTGATTAATGAAACACACTGACCTGGC | HL47984  | 15185 | 0.32075      | 1.1340266  | 0.51248149  | -0.471     | 0.6194713  | 0.8794527   |
| KDR   | NM_002253_160480_R | ACCTAAAAGAGGAGGAGTGGTTCCTAATCTCTGATTAATGAAACACACTGACCTGGC | HL47984  | 4411  | -0.1382      | 0.7043036  | 0.680974    | -0.0991    |            |             |
| KDR   | NM_002253_160480_R | ACCTAAAAGAGGAGGAGTGGTTCCTAATCTCTGATTAATGAAACACACTGACCTGGC | HL47984  | 9807  | -0.60275     | 0.3203151  | 0.02591263  | -0.56255   | 0.4010026  | 0.17911748  |
| KDR   | NM_002253_160480_R | ACCTAAAAGAGGAGGAGTGGTTCCTAATCTCTGATTAATGAAACACACTGACCTGGC | HL47984  | 15183 | 0.18275      | 0.9203841  | 0.00037352  | -0.0550375 | 0.47637357 | 0.82296245  |
| KDR   | NM_002253_160480_R | ACCTAAAAGAGGAGGAGTGGTTCCTAATCTCTGATTAATGAAACACACTGACCTGGC | HL47984  | 4648  | -0.9400215   | 0.18999463 | 0.05123234  | -0.6238625 | 0.7781393  | 0.13045173  |
| KDR   | NM_002253_160480_R | ACCTAAAAGAGGAGGAGTGGTTCCTAATCTCTGATTAATGAAACACACTGACCTGGC | HL47984  | 10024 | -0.718225    | 0.27464027 | 0.14161011  | -0.3234    | 0.1107392  | 0.43316591  |
| KDR   | NM_002253_160480_R | ACCTAAAAGAGGAGGAGTGGTTCCTAATCTCTGATTAATGAAACACACTGACCTGGC | HL47984  | 15400 | -0.718225    | 0.27464027 | 0.14161011  | -0.3234    | 0.1107392  | 0.43316591  |
| KDR   | NM_002253_160480_R | ACCTAAAAGAGGAGGAGTGGTTCCTAATCTCTGATTAATGAAACACACTGACCTGGC | HL47984  | 4791  | 0.18925      | 0.66023529 | 0.05129956  | -0.2584075 | 0.5812529  | -0.1974331  |
| KDR   | NM_002253_160480_R | ACCTAAAAGAGGAGGAGTGGTTCCTAATCTCTGATTAATGAAACACACTGACCTGGC | HL47984  | 10167 | 0.2224875    | 0.44076187 | 0.1055016   | -0.2009125 | 0.5625791  | 0.48077808  |
| KDR   | NM_002253_160480_R | ACCTAAAAGAGGAGGAGTGGTTCCTAATCTCTGATTAATGAAACACACTGACCTGGC | HL47984  | 15186 | 0.467375     | 0.1255786  | 0.0196754   | -0.078875  | 0.1879261  | 0.82415066  |
| KDR   | NM_0               |                                                           |          |       |              |            |             |            |            |             |

|          |                     |                                                    |          |        |              |            |            |             |            |             |
|----------|---------------------|----------------------------------------------------|----------|--------|--------------|------------|------------|-------------|------------|-------------|
| KIAA1706 | AK027386_36209_r1   | ACCTAAAAGAGCAACATTCGGACATCTTCGTAATTCGATCCGATCTCCCG | HL487994 | 3941   | 0.3196265    | 0.4304478  | 0.18928922 | 0.160875    | 0.1356026  | 0.42065964  |
| KIAA1706 | AK027386_36209_r2   | ACCTAAAAGAGCAACATTCGGACATCTTCGTAATTCGATCCGATCTCCCG | HL487994 | 3917   | 0.126        | 0.1718888  | 0.0821166  | 0.126       | 0.1718888  | 0.0821166   |
| KIAA1706 | AK027386_36209_r3   | ACCTAAAAGAGCAACATTCGGACATCTTCGTAATTCGATCCGATCTCCCG | HL487994 | 4673   | 0.0032625    | 0.2520180  | 0.8864193  | -0.11623    | 0.1326239  | 0.5726793   |
| KIAA1706 | AK027386_36209_r4   | ACCTAAAAGAGCAACATTCGGACATCTTCGTAATTCGATCCGATCTCCCG | HL487994 | 4682   | 0.0032625    | 0.2520180  | 0.8864193  | -0.11623    | 0.1326239  | 0.5726793   |
| KIAA1706 | AK027386_36209_r5   | ACCTAAAAGAGCAACATTCGGACATCTTCGTAATTCGATCCGATCTCCCG | HL487994 | 931    | 0.1          | 0.17472    | 0.390004   | 0.33375     | 0.588685   | 0.2416852   |
| KIAA1706 | AK027386_36209_r6   | ACCTAAAAGAGCAACATTCGGACATCTTCGTAATTCGATCCGATCTCCCG | HL487994 | 14697  | 0.0246667    | 0.1407488  | 0.92520869 | 0.0246667   | 0.1407488  | 0.92520869  |
| KIAA1718 | KM137934_361138_r1  | ACCTAAAAGAGCAACATTCGGACATCTTCGTAATTCGATCCGATCTCCCG | HL380710 | 4781   | 0.1156425    | 0.3495262  | 0.5640178  | -0.685265   | 0.6608039  | 0.0761537   |
| KIAA1718 | KM137934_361138_r2  | ACCTAAAAGAGCAACATTCGGACATCTTCGTAATTCGATCCGATCTCCCG | HL380710 | 1011   | 0.073375     | 0.1250422  | 0.7887379  | 0.073375    | 0.1250422  | 0.7887379   |
| KIAA1718 | KM137934_361138_r3  | ACCTAAAAGAGCAACATTCGGACATCTTCGTAATTCGATCCGATCTCCCG | HL380710 | 15533  | 0.0515625    | 0.1907243  | 0.80624825 | -0.8134625  | 0.3960213  | 0.012612087 |
| KIAA1718 | KM137934_361138_r4  | ACCTAAAAGAGCAACATTCGGACATCTTCGTAATTCGATCCGATCTCCCG | HL380710 | 4739   | 0.1091157    | 0.3495262  | 0.5640178  | -0.685265   | 0.6608039  | 0.0761537   |
| KIAA1718 | KM137934_361138_r5  | ACCTAAAAGAGCAACATTCGGACATCTTCGTAATTCGATCCGATCTCCCG | HL380710 | 10155  | -0.4844875   | 0.0670734  | 0.0146337  | -0.110225   | 0.6688517  | 0.7315337   |
| KIAA1718 | KM137934_361138_r6  | ACCTAAAAGAGCAACATTCGGACATCTTCGTAATTCGATCCGATCTCCCG | HL380710 | 15531  | -0.1164425   | 0.1309885  | 0.0727935  | -0.13773    | 0.7642821  | 0.7036608   |
| KIAA1718 | KM137934_361138_r7  | ACCTAAAAGAGCAACATTCGGACATCTTCGTAATTCGATCCGATCTCCCG | HL380710 | 4777   | 1.3111       | 0.3111     | 0.3111     | 1.47861     | 0.5097031  | 0.15630054  |
| KIAA1718 | KM137934_361138_r8  | ACCTAAAAGAGCAACATTCGGACATCTTCGTAATTCGATCCGATCTCCCG | HL380710 | 15529  | 1.268        | 0.77625    | 0.0652413  | -0.31785    | 1.7712873  | 0.7066209   |
| KIAA1718 | KM137934_361138_r9  | ACCTAAAAGAGCAACATTCGGACATCTTCGTAATTCGATCCGATCTCCCG | HL380710 | 10153  | 0.097105     | 0.1668515  | 0.1586965  | -0.17665    | 0.9648182  | 0.15681357  |
| KIAA1804 | KM103435_3610147_r1 | ACCTAAAAGAGCAACATTCGGACATCTTCGTAATTCGATCCGATCTCCCG | HL546455 | 2019   | 0.1126265    | 0.4920289  | 0.64505005 | -0.359725   | 0.1691261  | 0.0642765   |
| KIAA1804 | KM103435_3610147_r2 | ACCTAAAAGAGCAACATTCGGACATCTTCGTAATTCGATCCGATCTCCCG | HL546455 | 7395   | 0.37075      | 0.4954803  | 0.5789086  | -0.3993     | 0.1655662  | 0.04232106  |
| KIAA1804 | KM103435_3610147_r3 | ACCTAAAAGAGCAACATTCGGACATCTTCGTAATTCGATCCGATCTCCCG | HL546455 | 12771  | 0.2687       | 0.9138144  | 0.506734   | -0.28525    | 0.1313814  | 0.1002026   |
| KIAA1804 | KM103435_3610147_r4 | ACCTAAAAGAGCAACATTCGGACATCTTCGTAATTCGATCCGATCTCCCG | HL546455 | 765    | 0.8873       | 0.8873     | 0.8873     | 0.8873      | 0.8873     | 0.8873      |
| KIAA1804 | KM103435_3610147_r5 | ACCTAAAAGAGCAACATTCGGACATCTTCGTAATTCGATCCGATCTCCCG | HL546455 | 611    | -0.345715    | 0.5087811  | 0.2063562  | -0.09275    | 0.5210648  | 0.72771345  |
| KIAA1804 | KM103435_3610147_r6 | ACCTAAAAGAGCAACATTCGGACATCTTCGTAATTCGATCCGATCTCCCG | HL546455 | 11507  | 0.5034       | 1.2896494  | 0.3724956  | -0.36275    | 0.4378899  | 0.22146054  |
| KIAA1804 | KM103435_3610147_r7 | ACCTAAAAGAGCAACATTCGGACATCTTCGTAATTCGATCCGATCTCCCG | HL546455 | 756    | 0.823925     | 0.2824221  | 0.0372974  | 0.16555     | 0.3007726  | 0.43751668  |
| KIAA1804 | KM103435_3610147_r8 | ACCTAAAAGAGCAACATTCGGACATCTTCGTAATTCGATCCGATCTCCCG | HL546455 | 6132   | 0.76345      | 0.2679293  | 0.06520413 | -0.31725    | 0.3438033  | 0.11936881  |
| KIAA1804 | KM103435_3610147_r9 | ACCTAAAAGAGCAACATTCGGACATCTTCGTAATTCGATCCGATCTCCCG | HL546455 | 11508  | 0.097105     | 0.1668515  | 0.1586965  | -0.520825   | 0.3330442  | 0.04164819  |
| KIAA1909 | AB067496_361174_r1  | ACCTAAAAGAGCAACATTCGGACATCTTCGTAATTCGATCCGATCTCCCG | HL538800 | 3783   | 0.7093       | 0.4673649  | 0.0241218  |             |            |             |
| KIAA1909 | AB067496_361174_r2  | ACCTAAAAGAGCAACATTCGGACATCTTCGTAATTCGATCCGATCTCCCG | HL538800 | 1159   | 0.084255     | 0.2455058  | 0.9079987  |             |            |             |
| KIAA1909 | AB067496_361174_r3  | ACCTAAAAGAGCAACATTCGGACATCTTCGTAATTCGATCCGATCTCCCG | HL538800 | 14535  | 0.1743       | 0.4848462  | 0.0856309  |             |            |             |
| KIAA1909 | AB067496_361174_r4  | ACCTAAAAGAGCAACATTCGGACATCTTCGTAATTCGATCCGATCTCCCG | HL538800 | 3781   | 1.97675      | 0.3888962  | 0.0016126  |             |            |             |
| KIAA1909 | AB067496_361174_r5  | ACCTAAAAGAGCAACATTCGGACATCTTCGTAATTCGATCCGATCTCCCG | HL538800 | 9157   | 2.20723      | 0.1818741  | 1.93E-05   |             |            |             |
| KIAA1909 | AB067496_361174_r6  | ACCTAAAAGAGCAACATTCGGACATCTTCGTAATTCGATCCGATCTCCCG | HL538800 | 14533  | 1.323235     | 0.1479064  | 0.00229144 |             |            |             |
| KIAA1909 | AB067496_361174_r7  | ACCTAAAAGAGCAACATTCGGACATCTTCGTAATTCGATCCGATCTCCCG | HL538800 | 9161   | 0.9343133    | 0.3069764  | 0.01056162 |             |            |             |
| KIAA1909 | AB067496_361174_r8  | ACCTAAAAGAGCAACATTCGGACATCTTCGTAATTCGATCCGATCTCCCG | HL538800 | 14537  | 1.369475     | 0.2116468  | 0.0028769  |             |            |             |
| KIAA1909 | AB067496_361174_r9  | ACCTAAAAGAGCAACATTCGGACATCTTCGTAATTCGATCCGATCTCCCG | HL538800 | 3785   | 0.626425     | 0.6425368  | 0.15276944 |             |            |             |
| KIAA1909 | AB067496_361174_r10 | ACCTAAAAGAGCAACATTCGGACATCTTCGTAATTCGATCCGATCTCCCG | HL538800 | 4917   | -0.6688375   | 0.1618338  | 0.0811135  | -0.427265   | 0.4482392  | 0.09475897  |
| KIAA1909 | AB067496_361174_r11 | ACCTAAAAGAGCAACATTCGGACATCTTCGTAATTCGATCCGATCTCCCG | HL538800 | 15623  | 0.0000000    | 0.0000000  | 0.0000000  |             |            |             |
| KIAA1909 | AB067496_361174_r12 | ACCTAAAAGAGCAACATTCGGACATCTTCGTAATTCGATCCGATCTCCCG | HL538800 | 15669  | -0.5126265   | 0.0843306  | 0.0120208  | 0.8851875   | 0.2115623  | 0.39992719  |
| KIAA1909 | AB067496_361174_r13 | ACCTAAAAGAGCAACATTCGGACATCTTCGTAATTCGATCCGATCTCCCG | HL538800 | 4915   | -0.7397075   | 0.2920889  | 0.08014917 | -0.2203     | 0.3070611  | 0.37280554  |
| KIAA1909 | AB067496_361174_r14 | ACCTAAAAGAGCAACATTCGGACATCTTCGTAATTCGATCCGATCTCCCG | HL538800 | 10229  | -0.3774325   | 0.1274752  | 0.16408139 | -0.4020125  | 0.4608139  | 0.188407166 |
| KIAA1909 | AB067496_361174_r15 | ACCTAAAAGAGCAACATTCGGACATCTTCGTAATTCGATCCGATCTCCCG | HL538800 | 15667  | -0.3287875   | 0.2861305  | 0.11280409 | -0.513075   | 0.4944241  | 0.02913986  |
| KIAA1909 | AB067496_361174_r16 | ACCTAAAAGAGCAACATTCGGACATCTTCGTAATTCGATCCGATCTCCCG | HL538800 | 4913   | -0.1313825   | 0.2824221  | 0.0372974  | -0.038125   | 0.7691669  | 0.073000058 |
| KIAA1909 | AB067496_361174_r17 | ACCTAAAAGAGCAACATTCGGACATCTTCGTAATTCGATCCGATCTCCCG | HL538800 | 10289  | -0.2874805   | 0.4892465  | 0.09503844 | 0.0137895   | 0.3961469  | 0.091756314 |
| KIAA1909 | AB067496_361174_r18 | ACCTAAAAGAGCAACATTCGGACATCTTCGTAATTCGATCCGATCTCCCG | HL538800 | 15656  | -0.165183323 | 0.0296663  | 0.0098125  | 0.0898125   | 0.38705523 | 0.680152029 |
| KIAA1912 | AB067496_361174_r19 | ACCTAAAAGAGCAACATTCGGACATCTTCGTAATTCGATCCGATCTCCCG | HL538800 | 3789   | 0.63575      | 0.0974234  | 0.0520919  |             |            |             |
| KIAA1912 | AB067496_361174_r20 | ACCTAAAAGAGCAACATTCGGACATCTTCGTAATTCGATCCGATCTCCCG | HL538800 | 117136 | 0.362953     | 0.1181262  | 0.0056539  |             |            |             |
| KIAA1912 | AB067496_361174_r21 | ACCTAAAAGAGCAACATTCGGACATCTTCGTAATTCGATCCGATCTCCCG | HL538800 | 14541  | 0.4072       | 0.4685259  | 0.2068717  |             |            |             |
| KIAA1912 | AB067496_361174_r22 | ACCTAAAAGAGCAACATTCGGACATCTTCGTAATTCGATCCGATCTCCCG | HL538800 | 117136 | 3787         | -0.38075   | 0.4937598  | 0.1375402   |            |             |
| KIAA1912 | AB067496_361174_r23 | ACCTAAAAGAGCAACATTCGGACATCTTCGTAATTCGATCCGATCTCCCG | HL538800 | 9163   | 0.8399       | 0.3691267  | 0.0109745  |             |            |             |
| KIAA1912 | AB067496_361174_r24 | ACCTAAAAGAGCAACATTCGGACATCTTCGTAATTCGATCCGATCTCCCG | HL538800 | 117136 | 14539        | 0.16425    | 0.3667068  | 0.57015628  |            |             |
| KIAA1912 | AB067496_361174_r25 | ACCTAAAAGAGCAACATTCGGACATCTTCGTAATTCGATCCGATCTCCCG | HL538800 | 14541  | 0.4421       | 0.1763201  | 0.02916663 |             |            |             |
| KIAA1912 | AB067496_361174_r26 | ACCTAAAAGAGCAACATTCGGACATCTTCGTAATTCGATCCGATCTCCCG | HL538800 | 117136 | 9167         | -0.47025   | 0.1367161  | 0.0188199   |            |             |
| KIAA1912 | AB067496_361174_r27 | ACCTAAAAGAGCAACATTCGGACATCTTCGTAATTCGATCCGATCTCCCG | HL538800 | 14541  | 0.4421       | 0.1763201  | 0.02916663 |             |            |             |
| KIAA1920 | KM137548_364938_r1  | ACCTAAAAGAGCAACATTCGGACATCTTCGTAATTCGATCCGATCTCCCG | HL513096 | 4951   | 0.3479375    | 0.2688528  | 0.08714734 | -0.3134875  | 0.1039202  | 0.07495516  |
| KIAA1920 | KM137548_364938_r2  | ACCTAAAAGAGCAACATTCGGACATCTTCGTAATTCGATCCGATCTCCCG | HL513096 | 14533  | 0.0682725    | 0.0321622  | 0.0048979  |             |            |             |
| KIAA1920 | KM137548_364938_r3  | ACCTAAAAGAGCAACATTCGGACATCTTCGTAATTCGATCCGATCTCCCG | HL513096 | 15703  | 0.1812135    | 0.0270143  | 0.0018903  | -0.0208375  | 0.4267976  | 0.86690775  |
| KIAA1920 | KM137548_364938_r4  | ACCTAAAAGAGCAACATTCGGACATCTTCGTAATTCGATCCGATCTCCCG | HL513096 | 4949   | 0.3709785    | 0.92021047 | 0.2671953  | -0.4504875  | 0.9906652  | 0.34279872  |
| KIAA1920 | KM137548_364938_r5  | ACCTAAAAGAGCAACATTCGGACATCTTCGTAATTCGATCCGATCTCCCG | HL513096 | 10313  | 0.0754625    | 0.0839818  | 0.0607332  | 0.232729289 |            |             |
| KIAA1920 | KM137548_364938_r6  | ACCTAAAAGAGCAACATTCGGACATCTTCGTAATTCGATCCGATCTCCCG | HL513096 | 15701  | 0.1630285    | 0.2237491  | 0.3424036  | -0.589075   | 1.1389733  | 0.3025793   |
| KIAA1920 | KM137548_364938_r7  | ACCTAAAAGAGCAACATTCGGACATCTTCGTAATTCGATCCGATCTCCCG | HL513096 | 4953   | 0.578925     | 0.2922463  | 0.0541391  | 0.0000000   | 0.0000000  | 0.0000000   |
| KIAA1920 | KM137548_364938_r8  | ACCTAAAAGAGCAACATTCGGACATCTTCGTAATTCGATCCGATCTCCCG | HL513096 | 10329  | -0.2426125   | 0.17366112 | 0.0139026  | -0.0028875  | 0.7031208  | 0.02696155  |
| KIAA1920 | KM137548_364938_r9  | ACCTAAAAGAGCAACATTCGGACATCTTCGTAATTCGATCCGATCTCCCG | HL513096 | 15703  | 0.0682725    | 0.0321622  | 0.0048979  | -0.8231215  | 0.73454027 | 0.65849015  |
| KIAA1920 | KM137548_364938_r10 | ACCTAAAAGAGCAACATTCGGACATCTTCGTAATTCGATCCGATCTCCCG | HL513096 | 15701  | 0.5407605    | 0.6848498  | 0.11180453 |             |            |             |
| KIAA1920 | KM137548_364938_r11 | ACCTAAAAGAGCAACATTCGGACATCTTCGTAATTCGATCCGATCTCCCG | HL513096 | 4952   | 0.7420625    | 0.1791521  | 0.18423837 |             |            |             |
| KIAA1920 | KM137548_364938_r12 | ACCTAAAAGAGCAACATTCGGACATCTTCGTAATTCGATCCGATCTCCCG | HL513096 | 10313  | 0.1001275    | 0.6207479  | 0.04123798 |             |            |             |
| KIAA1920 | KM137548_364938_r13 | ACCTAAAAGAGCAACATTCGGACATCTTCGTAATTCGATCCGATCTCCCG | HL513096 | 15701  | 0.0754625    | 0.0839818  | 0.0607332  |             |            |             |
| KIAA1920 | KM137548_364938_r14 | ACCTAAAAGAGCAACATTCGGACATCTTCGTAATTCGATCCGATCTCCCG | HL513096 | 15701  | 0.1630285    | 0.2237491  | 0.3424036  |             |            |             |
| KIAA1920 | KM137548_364938_r15 | ACCTAAAAGAGCAACATTCGGACATCTTCGTAATTCGATCCGATCTCCCG | HL513096 | 4953   | 0.578925     | 0.2922463  | 0.0541391  |             |            |             |
| KIAA1920 | KM137548_364938_r16 | ACCTAAAAGAGCAACATTCGGACATCTTCGTAATTCGATCCGATCTCCCG | HL513096 | 10329  | -0.2426125   | 0.17366112 | 0.0139026  |             |            |             |
| KIAA1920 | KM137548_364938_r17 | ACCTAAAAGAGCAACATTCGGACATCTTCGTAATTCGATCCGATCTCCCG | HL513096 | 15703  | 0.0682725    | 0.0321622  | 0.0048979  |             |            |             |
| KIAA1920 | KM137548_364938_r18 | ACCTAAAAGAGCAACATTCGGACATCTTCGTAATTCGATCCGATCTCCCG | HL513096 | 15701  | 0.5407605    | 0.6848498  | 0.11180453 |             |            |             |
| KIAA1920 | KM137548_364938_r19 | ACCTAAAAGAGCAACATTCGGACATCTTCGTAATTCGATCCGATCTCCCG | HL513096 | 4952   | 0.7420625    | 0.1791521  | 0.18423837 |             |            |             |
| KIAA1920 | KM137548_364938_r20 | ACCTAAAAGAGCAACATTCGGACATCTTCGTAATTCGATCCGATCTCCCG | HL513096 | 10313  | 0.1001275    | 0.6207479  | 0.04123798 |             |            |             |
| KIAA1920 | KM137548_364938_r21 | ACCTAAAAGAGCAACATTCGGACATCTTCGTAATTCGATCCGATCTCCCG | HL513096 | 157    |              |            |            |             |            |             |



|       |                    |                                                             |          |       |             |            |             |             |            |             |
|-------|--------------------|-------------------------------------------------------------|----------|-------|-------------|------------|-------------|-------------|------------|-------------|
| LG459 | NM_009587_361023_R | ACCTAAAGAGGAGGACACCTTTGAGATCTCTTGAAATGATTAACAAGAGTGTCTACAGG | HL81337  | 13616 | -0.07425    | 0.9374878  | 0.8546653   | 0.654425    | 1.1139149  | 0.178410225 |
| LG459 | NM_009587_360447_R | ACCTAAAATAGTACCACTCTCTGATCTGATGATTAAGAGAGATGTCTCCAGG        | HL81337  | 2862  | 0.0465      | 0.9748321  | 0.84093337  |             |            |             |
| LG459 | NM_009587_360447_R | ACCTAAAATAGTACCACTCTCTGATCTGATGATTAAGAGAGATGTCTCCAGG        | HL81337  | 8238  | 0.47679     | 0.4999951  | 0.23300803  |             |            |             |
| LHP   | AF463496_360477_R  | ACCTAAAATAGTACCACTCTCTGATCTGATGATTAAGAGAGATGTCTCCAGG        | HL81337  | 13618 | 0.07423     | 0.9360289  | 0.18212442  |             |            |             |
| LHP   | AF463496_360477_R  | ACCTAAAATAGTACCACTCTCTGATCTGATGATTAAGAGAGATGTCTCCAGG        | HL81337  | 13618 |             |            |             | 0.93932     | 1.0309918  | 0.0466959   |
| LHP   | AF463496_360477_R  | ACCTAAAATAGTACCACTCTCTGATCTGATGATTAAGAGAGATGTCTCCAGG        | HL81337  | 8424  | 0.78132333  | 0.3171174  | 0.0229922   | 0.874275    | 1.0173919  | 0.0761694   |
| LHP   | AF463496_360477_R  | ACCTAAAATAGTACCACTCTCTGATCTGATGATTAAGAGAGATGTCTCCAGG        | HL81337  | 13800 | 0.08626667  | 0.1961265  | 0.02031196  | 0.101       | 1.0309496  | 0.04232407  |
| LHP   | AF463496_360477_R  | ACCTAAAATAGTACCACTCTCTGATCTGATGATTAAGAGAGATGTCTCCAGG        | HL81337  | 3046  | 0.131715    | 0.875117   | 0.39570017  | 0.1441      |            |             |
| LHP   | AF463496_360477_R  | ACCTAAAATAGTACCACTCTCTGATCTGATGATTAAGAGAGATGTCTCCAGG        | HL81337  | 8422  | -0.14495    | 0.2460828  | 0.4170543   | 0.2779      | 0.9394525  | 0.28620326  |
| LHP   | AF463496_360477_R  | ACCTAAAATAGTACCACTCTCTGATCTGATGATTAAGAGAGATGTCTCCAGG        | HL81337  | 2738  | 0.0370788   | 0.9120943  | 0.8406667   | 0.282825    | 0.4282061  | 0.26349734  |
| LHP   | AF463496_360477_R  | ACCTAAAATAGTACCACTCTCTGATCTGATGATTAAGAGAGATGTCTCCAGG        | HL81337  | 2713  | -1.209      | 0.4079199  | 0.00192926  | -0.9415     | 0.5563008  | 0.01145732  |
| LHP   | AF463496_360477_R  | ACCTAAAATAGTACCACTCTCTGATCTGATGATTAAGAGAGATGTCTCCAGG        | HL81337  | 8089  | -0.009      | 0.3717984  | 0.00336233  | -0.30271    | 0.4722202  | 0.13267626  |
| LHP   | AF463496_360477_R  | ACCTAAAATAGTACCACTCTCTGATCTGATGATTAAGAGAGATGTCTCCAGG        | HL81337  | 13465 | -1.239      | 0.2618492  | 0.00961127  | 0.848279    | 0.5817063  | 0.02284364  |
| LMK1  | NM_002314_361386_R | ACCTAAAAGAGGTCACCTTCACATCGATCTTGATGATGAGATGATGAGTCCAGG      | HL83656  | 159   | 1.07135     | 1.7437593  | 0.2498703   | -0.207125   | 0.43019021 | 0.389179484 |
| LMK1  | NM_002314_361386_R | ACCTAAAAGAGGTCACCTTCACATCGATCTTGATGATGAGATGATGAGTCCAGG      | HL83656  | 5335  | 1.00366667  | 1.1846493  | 0.10543312  | -0.121375   | 0.4743821  | 0.40093337  |
| LMK1  | NM_002314_361386_R | ACCTAAAAGAGGTCACCTTCACATCGATCTTGATGATGAGATGATGAGTCCAGG      | HL83656  | 10911 | 1.184       | 1.2368919  | 0.09827726  | 0.1018735   | 0.5250151  | 0.70288705  |
| LMK1  | NM_002314_361386_R | ACCTAAAAGAGGTCACCTTCACATCGATCTTGATGATGAGATGATGAGTCCAGG      | HL83656  | 160   | -1.00475    | 0.7323757  | 0.02309963  | -1.070325   | 0.4870723  | 0.03285346  |
| LMK1  | NM_002314_361386_R | ACCTAAAAGAGGTCACCTTCACATCGATCTTGATGATGAGATGATGAGTCCAGG      | HL83656  | 5336  | -1.07473    | 0.8312588  | 0.08299217  | -1.0606125  | 0.8331380  | 0.03736807  |
| LMK1  | NM_002314_361386_R | ACCTAAAAGAGGTCACCTTCACATCGATCTTGATGATGAGATGATGAGTCCAGG      | HL83656  | 10912 | -1.04478    | 0.999444   | 0.0251844   | -1.042875   | 0.7975424  | 0.03202926  |
| LMK2  | NM_016733_361312_R | ACCTAAAAGAGGTCACCTTCACATCGATCTTGATGATGAGATGATGAGTCCAGG      | HL83656  | 572   | 1.28783     | 3.009793   | 0.05986749  | 1.8193333   | 0.8723154  | 0.01621793  |
| LMK2  | NM_016733_361312_R | ACCTAAAAGAGGTCACCTTCACATCGATCTTGATGATGAGATGATGAGTCCAGG      | HL83656  | 5948  | 1.44895     | 1.4564209  | 0.05303333  | 1.2652      | 1.2281705  | 0.09719503  |
| LMK2  | NM_016733_361312_R | ACCTAAAAGAGGTCACCTTCACATCGATCTTGATGATGAGATGATGAGTCCAGG      | HL83656  | 11324 | 1.182       | 1.4870943  | 0.07574607  | 1.042875    | 1.4589005  | 0.00978641  |
| LMK2  | NM_016733_361312_R | ACCTAAAAGAGGTCACCTTCACATCGATCTTGATGATGAGATGATGAGTCCAGG      | HL83656  | 573   | -1.2062     | 0.7358919  | 0.311992214 | 0.6832      | 0.4253084  | 0.56238033  |
| LMK2  | NM_016733_361312_R | ACCTAAAAGAGGTCACCTTCACATCGATCTTGATGATGAGATGATGAGTCCAGG      | HL83656  | 5949  | -1.12345    | 4.4802803  | 0.53296367  | -0.8246667  | 4.79051495 | 0.68950434  |
| LMK2  | NM_016733_361312_R | ACCTAAAAGAGGTCACCTTCACATCGATCTTGATGATGAGATGATGAGTCCAGG      | HL83656  | 11325 | -1.174025   | 3.163513   | 0.3857027   | -0.2676     | 3.6610419  | 0.87892026  |
| LMK2  | NM_016733_361312_R | ACCTAAAAGAGGTCACCTTCACATCGATCTTGATGATGAGATGATGAGTCCAGG      | HL83656  | 1758  | 1.5695      | 1.4545763  | 0.06147778  | 1.042875    | 1.26888807 | 0.00978641  |
| LMK2  | NM_016733_361312_R | ACCTAAAAGAGGTCACCTTCACATCGATCTTGATGATGAGATGATGAGTCCAGG      | HL83656  | 7134  | 1.0699      | 1.7001693  | 0.05212279  | -1.0588     | 3.3287582  | 0.514636397 |
| LMK2  | NM_016733_361312_R | ACCTAAAAGAGGTCACCTTCACATCGATCTTGATGATGAGATGATGAGTCCAGG      | HL83656  | 12510 | 1.2609      | 1.4545763  | 0.06147778  | 1.042875    | 1.26888807 | 0.00978641  |
| LMK3  | AC096170_361796_R  | ACCTAAAAGAGGTCACCTTCACATCGATCTTGATGATGAGATGATGAGTCCAGG      | HL83656  | 3996  | -0.1838785  | 0.07581836 | 0.22508887  | -0.32053333 | 3.8821119  | 0.48909512  |
| LMK3  | AC096170_361796_R  | ACCTAAAAGAGGTCACCTTCACATCGATCTTGATGATGAGATGATGAGTCCAGG      | HL83656  | 9372  | 0.20005     | 0.9176413  | 0.51794703  | 0.562970    | 0.1759077  | 0.02461084  |
| LMK3  | AC096170_361796_R  | ACCTAAAAGAGGTCACCTTCACATCGATCTTGATGATGAGATGATGAGTCCAGG      | HL83656  | 14748 | 0.0430625   | 0.44523228 | 0.88047987  | 0.27945     | 0.45870149 | 0.04602024  |
| LMK3  | AC096170_361796_R  | ACCTAAAAGAGGTCACCTTCACATCGATCTTGATGATGAGATGATGAGTCCAGG      | HL83656  | 3998  | -0.1524875  | 0.4115734  | 0.49049074  | 0.4438      | 0.8603875  | 0.25131203  |
| LMK3  | AC096170_361796_R  | ACCTAAAAGAGGTCACCTTCACATCGATCTTGATGATGAGATGATGAGTCCAGG      | HL83656  | 9374  | -0.1948025  | 0.3302404  | 0.36691549  | 0.23551     | 0.7002026  | 0.27505727  |
| LMK3  | AC096170_361796_R  | ACCTAAAAGAGGTCACCTTCACATCGATCTTGATGATGAGATGATGAGTCCAGG      | HL83656  | 14750 | -0.1897125  | 0.3538848  | 0.3596142   | 0.215       | 0.6822841  | 0.49963139  |
| LMK3  | AC096170_361796_R  | ACCTAAAAGAGGTCACCTTCACATCGATCTTGATGATGAGATGATGAGTCCAGG      | HL83656  | 3999  | 1.5695      | 1.4545763  | 0.06147778  | 1.042875    | 1.26888807 | 0.00978641  |
| LMK3  | AC096170_361796_R  | ACCTAAAAGAGGTCACCTTCACATCGATCTTGATGATGAGATGATGAGTCCAGG      | HL83656  | 9370  |             |            |             | -0.1322     | 0.3045631  | 0.48128323  |
| LMK3  | AC096170_361796_R  | ACCTAAAAGAGGTCACCTTCACATCGATCTTGATGATGAGATGATGAGTCCAGG      | HL83656  | 14746 |             |            |             | -0.1577     | 0.2969775  | 0.48928848  |
| LN10  | BC04556_361038_R   | ACCTAAAAGAGGTCACCTTCACATCGATCTTGATGATGAGATGATGAGTCCAGG      | HL513666 | 4279  | 0.316       | 1.0006328  | 0.47307352  | 0.620205    | 0.47289142 | 0.04842475  |
| LN10  | BC04556_361038_R   | ACCTAAAAGAGGTCACCTTCACATCGATCTTGATGATGAGATGATGAGTCCAGG      | HL513666 | 9611  | 0.292025    | 1.1471447  | 0.55596023  | 0.664975    | 0.39981745 | 0.02799417  |
| LN10  | BC04556_361038_R   | ACCTAAAAGAGGTCACCTTCACATCGATCTTGATGATGAGATGATGAGTCCAGG      | HL513666 | 15027 | 0.42025     | 0.2283283  | 0.04869876  | 0.4868175   | 0.33703243 | 0.05203336  |
| LN10  | BC04556_361038_R   | ACCTAAAAGAGGTCACCTTCACATCGATCTTGATGATGAGATGATGAGTCCAGG      | HL513666 | 4277  | 0.8236      | 0.6066288  | 0.02720149  | 0.2662789   | 0.16278209 | 0.6550333   |
| LN10  | BC04556_361038_R   | ACCTAAAAGAGGTCACCTTCACATCGATCTTGATGATGAGATGATGAGTCCAGG      | HL513666 | 9612  | 0.0000000   | 0.0000000  | 0.0000000   | 0.0000000   | 0.0000000  | 0.0000000   |
| LN10  | BC04556_361038_R   | ACCTAAAAGAGGTCACCTTCACATCGATCTTGATGATGAGATGATGAGTCCAGG      | HL513666 | 15029 | -0.7428     | 0.59061827 | 0.03635995  | -0.1733     | 0.2719598  | 0.36681897  |
| LN10  | BC04556_361038_R   | ACCTAAAAGAGGTCACCTTCACATCGATCTTGATGATGAGATGATGAGTCCAGG      | HL513666 | 4273  | 0.0000000   | 0.0000000  | 0.0000000   | 0.0000000   | 0.0000000  | 0.0000000   |
| LN10  | BC04556_361038_R   | ACCTAAAAGAGGTCACCTTCACATCGATCTTGATGATGAGATGATGAGTCCAGG      | HL513666 | 9609  | -0.37415    | 0.1979     | 0.0990277   | -0.18725    | 0.1887187  | 0.2607777   |
| LN10  | BC04556_361038_R   | ACCTAAAAGAGGTCACCTTCACATCGATCTTGATGATGAGATGATGAGTCCAGG      | HL513666 | 15025 | -0.4067     | 0.4190155  | 0.10863192  | -0.1518     | 0.38117307 | 0.490159872 |
| LMO2  | NM_005774_361240_R | ACCTAAAAGAGGTCACCTTCACATCGATCTTGATGATGAGATGATGAGTCCAGG      | HL34560  | 3989  | -0.39813333 | 0.3729     | 0.0000000   |             |            |             |
| LMO2  | NM_005774_361240_R | ACCTAAAAGAGGTCACCTTCACATCGATCTTGATGATGAGATGATGAGTCCAGG      | HL34560  | 8771  | -0.28433333 | 0.15532746 | 0.09856223  |             |            |             |
| LMO2  | NM_005774_361240_R | ACCTAAAAGAGGTCACCTTCACATCGATCTTGATGATGAGATGATGAGTCCAGG      | HL34560  | 1414  | -0.0000000  | 0.0000000  | 0.0000000   |             |            |             |
| LMO2  | NM_005774_361240_R | ACCTAAAAGAGGTCACCTTCACATCGATCTTGATGATGAGATGATGAGTCCAGG      | HL34560  | 3391  | -0.348825   | 0.1848134  | 0.06449222  |             |            |             |
| LMO2  | NM_005774_361240_R | ACCTAAAAGAGGTCACCTTCACATCGATCTTGATGATGAGATGATGAGTCCAGG      | HL34560  | 1413  | 0.813735    | 2.8147176  | 0.0148778   |             |            |             |
| LMO2  | NM_005774_361240_R | ACCTAAAAGAGGTCACCTTCACATCGATCTTGATGATGAGATGATGAGTCCAGG      | HL34560  | 1415  | 0.8811      | 0.7812933  | 0.04192208  |             |            |             |
| LMO2  | NM_005774_361240_R | ACCTAAAAGAGGTCACCTTCACATCGATCTTGATGATGAGATGATGAGTCCAGG      | HL34560  | 8769  | 0.0000000   | 0.0000000  | 0.0000000   |             |            |             |
| LMO2  | NM_005774_361240_R | ACCTAAAAGAGGTCACCTTCACATCGATCTTGATGATGAGATGATGAGTCCAGG      | HL34560  | 1413  | 0.67373333  | 0.7605304  | -0.20586667 | 0.76657376  | 0.61653103 |             |
| LMO2  | NM_005774_361240_R | ACCTAAAAGAGGTCACCTTCACATCGATCTTGATGATGAGATGATGAGTCCAGG      | HL34560  | 8777  | 1.4483      | 2.4578313  | 0.22693024  | -1.0269     | 1.0432159  | 0.04979943  |
| LMO2  | NM_005774_361240_R | ACCTAAAAGAGGTCACCTTCACATCGATCTTGATGATGAGATGATGAGTCCAGG      | HL34560  | 11253 | 0.54646667  | 0.8115366  | 0.0000000   | 0.7907      | 0.3296325  | 0.03200877  |
| LMO2  | NM_005774_361240_R | ACCTAAAAGAGGTCACCTTCACATCGATCTTGATGATGAGATGATGAGTCCAGG      | HL34560  | 44179 | 0.486075    | 0.1818708  | 0.29370248  | -2.67313333 | 0.2126229  | 0.04918187  |
| LMO2  | NM_005774_361240_R | ACCTAAAAGAGGTCACCTTCACATCGATCTTGATGATGAGATGATGAGTCCAGG      | HL34560  | 8788  | 0.5695      | 0.7848184  | 0.0000000   |             |            |             |
| LMO2  | NM_005774_361240_R | ACCTAAAAGAGGTCACCTTCACATCGATCTTGATGATGAGATGATGAGTCCAGG      | HL34560  | 11254 | 1.06416     | 4.4652174  | 0.56480744  | -0.57933333 | 0.2963153  | 0.00015104  |
| LMO2  | NM_005774_361240_R | ACCTAAAAGAGGTCACCTTCACATCGATCTTGATGATGAGATGATGAGTCCAGG      | HL34560  | 44179 | 503         | 0.13875    | 1.2424374   | 0.55175534  | -1.4356    | 0.7216061   |
| LMO2  | NM_005774_361240_R | ACCTAAAAGAGGTCACCTTCACATCGATCTTGATGATGAGATGATGAGTCCAGG      | HL34560  | 8779  | 0.3985      | 0.7364932  | 0.0000000   | -0.0213     | 0.2422228  | 0.00883347  |
| LMO2  | NM_005774_361240_R | ACCTAAAAGAGGTCACCTTCACATCGATCTTGATGATGAGATGATGAGTCCAGG      | HL34560  | 11255 | -0.00985    | 1.50933076 | 0.83827417  | -0.28216667 | 2.61365577 | 0.02094762  |
| LMO2  | NM_005774_361240_R | ACCTAAAAGAGGTCACCTTCACATCGATCTTGATGATGAGATGATGAGTCCAGG      | HL34560  | 2022  |             |            |             |             |            |             |
| LMO2  | NM_005774_361240_R | ACCTAAAAGAGGTCACCTTCACATCGATCTTGATGATGAGATGATGAGTCCAGG      | HL34560  | 7398  |             |            |             |             |            |             |
| LMO2  | NM_005774_361240_R | ACCTAAAAGAGGTCACCTTCACATCGATCTTGATGATGAGATGATGAGTCCAGG      | HL34560  | 1274  |             |            |             |             |            |             |
| LMO2  | NM_005774_361240_R | ACCTAAAAGAGGTCACCTTCACATCGATCTTGATGATGAGATGATGAGTCCAGG      | HL34560  | 846   | -0.8251     | 0.32227010 | 0.01278857  | -0.60586667 | 0.4993137  | 0.10178148  |
| LMO2  | NM_005774_361240_R | ACCTAAAAGAGGTCACCTTCACATCGATCTTGATGATGAGATGATGAGTCCAGG      | HL34560  | 1275  | 0.0000000   | 0.0000000  | 0.0000000   | 0.7738      | 0.3812824  | 0.26873986  |
| LMO2  | NM_005774_361240_R | ACCTAAAAGAGGTCACCTTCACATCGATCTTGATGATGAGATGATGAGTCCAGG      | HL34560  | 11598 | -0.4445     | 0.0559221  | 0.15528718  | -0.34976667 | 0.38925366 | 0.227344437 |
| LMO2  | NM_005774_361240_R | ACCTAAAAGAGGTCACCTTCACATCGATCTTGATGATGAGATGATGAGTCCAGG      | HL34560  | 4164  | 1.57675     | 0.2611548  | 0.00021519  | 0.82025     | 0.67354    | 0.02439991  |
| LMO2  | NM_005774_361240_R | ACCTAAAAGAGGTCACCTTCACATCGATCTTGATGATGAGATGATGAGTCCAGG      | HL34560  | 14915 | 1.5625      | 0.2328424  | 0.0000000   | 0.7297      | 0.0681202  | 0.22496632  |
| LMO2  | NM_005774_361240_R | ACCTAAAAGAGGTCACCTTCACATCGATCTTGATGATGAGATGATGAGTCCAGG      | HL34560  | 9540  |             |            |             |             |            |             |







|       |                    |                                                         |          |       |             |            |             |             |            |              |
|-------|--------------------|---------------------------------------------------------|----------|-------|-------------|------------|-------------|-------------|------------|--------------|
| MAPK3 | NM_002746_b0991.1  | ACCTAAAAGGACCGGATGTAACTTTCATTCCTGATTAAGGTTAAAGTTCAGTCCG | HL861    | 7211  | -1.1088     | 0.3777864  | 0.02889939  | -0.2195     | 0.7269577  | 0.634035429  |
| MAPK3 | NM_002746_b0991.2  | ACCTAAAAGGACCGGATGTAACTTTCATTCCTGATTAAGGTTAAAGTTCAGTCCG | HL861    | 12587 | 0.0000000   | 0.0000000  | 0.0000000   | 0.0000000   | 0.0000000  | 0.0000000    |
| MAPK4 | NM_002747_b01046.4 | ACCTAAAAGGACCGGATGTAACTTTCATTCCTGATTAAGGTTAAAGTTCAGTCCG | HL43378  | 249   | -0.15715    | 0.7398496  | 0.63480954  | 0.055375    | 0.16516473 | 0.72021464   |
| MAPK4 | NM_002747_b01046.5 | ACCTAAAAGGACCGGATGTAACTTTCATTCCTGATTAAGGTTAAAGTTCAGTCCG | HL43378  | 2628  | 0.0000000   | 0.0000000  | 0.0000000   | 0.0000000   | 0.0000000  | 0.0000000    |
| MAPK4 | NM_002747_b01046.6 | ACCTAAAAGGACCGGATGTAACTTTCATTCCTGATTAAGGTTAAAGTTCAGTCCG | HL43378  | 11001 | 0.187325    | 1.8972833  | 0.72313861  | 0.188128    | 0.152634   | 0.27658292   |
| MAPK4 | NM_002747_b01046.7 | ACCTAAAAGGACCGGATGTAACTTTCATTCCTGATTAAGGTTAAAGTTCAGTCCG | HL43378  | 1857  | 0.3479      |            |             | -0.270275   | 0.76974736 | 0.33076589   |
| MAPK4 | NM_002747_b01046.8 | ACCTAAAAGGACCGGATGTAACTTTCATTCCTGATTAAGGTTAAAGTTCAGTCCG | HL43378  | 7213  | 0.28486     | 0.04136575 | 0.20234063  | -0.4202375  | 0.76668636 | 0.26020286   |
| MAPK4 | NM_002747_b01046.9 | ACCTAAAAGGACCGGATGTAACTTTCATTCCTGATTAAGGTTAAAGTTCAGTCCG | HL43378  | 12589 | 0.4478      | 0.1319613  | 0.16576204  | -0.232125   | 0.73034004 | 0.37012491   |
| MAPK4 | NM_002747_b01047.1 | ACCTAAAAGGACCGGATGTAACTTTCATTCCTGATTAAGGTTAAAGTTCAGTCCG | HL43378  | 1839  | -0.2884663  | 0.7275922  | 0.40382617  | 0.13311362  | 0.30905979 | 0.21941884   |
| MAPK4 | NM_002747_b01047.2 | ACCTAAAAGGACCGGATGTAACTTTCATTCCTGATTAAGGTTAAAGTTCAGTCCG | HL43378  | 2281  | -0.3727     | 0.4232524  | 0.15574265  | -0.1404265  | 0.33123278 | 0.491297004  |
| MAPK4 | NM_002747_b01047.3 | ACCTAAAAGGACCGGATGTAACTTTCATTCCTGATTAAGGTTAAAGTTCAGTCCG | HL43378  | 12831 | 0.0000000   | 0.0000000  | 0.0000000   | 0.0000000   | 0.0000000  | 0.0000000    |
| MAPK6 | NM_002748_b01120.1 | ACCTAAAAGGACCGGATGTAACTTTCATTCCTGATTAAGGTTAAAGTTCAGTCCG | HL41847  | 250   | 0.14567     | 0.6577911  | 0.62734573  | -0.2748333  | 0.2893263  | 0.29611453   |
| MAPK6 | NM_002748_b01120.2 | ACCTAAAAGGACCGGATGTAACTTTCATTCCTGATTAAGGTTAAAGTTCAGTCCG | HL41847  | 5628  | 0.48966     | 0.0771882  | 0.67218979  | -0.117125   | 0.3004712  | 0.14403089   |
| MAPK6 | NM_002748_b01120.3 | ACCTAAAAGGACCGGATGTAACTTTCATTCCTGATTAAGGTTAAAGTTCAGTCCG | HL41847  | 11002 | 0.2051      | 0.3492026  | 0.14118189  | -0.4202375  | 0.30031411 | 0.2466299787 |
| MAPK6 | NM_002748_b01120.4 | ACCTAAAAGGACCGGATGTAACTTTCATTCCTGATTAAGGTTAAAGTTCAGTCCG | HL41847  | 251   | -0.59725    | 0.5824374  | 0.0968049   | -0.342325   | 0.17466113 | 0.15444203   |
| MAPK6 | NM_002748_b01120.5 | ACCTAAAAGGACCGGATGTAACTTTCATTCCTGATTAAGGTTAAAGTTCAGTCCG | HL41847  | 5627  | 0.587975    | 0.4467064  | 0.00989241  | -0.301825   | 0.3665005  | 0.10590693   |
| MAPK6 | NM_002748_b01120.6 | ACCTAAAAGGACCGGATGTAACTTTCATTCCTGATTAAGGTTAAAGTTCAGTCCG | HL41847  | 11003 | -0.48975    | 0.5883893  | 0.11317475  | -0.2874875  | 0.36512879 | 0.21093093   |
| MAPK6 | NM_002748_b01120.7 | ACCTAAAAGGACCGGATGTAACTTTCATTCCTGATTAAGGTTAAAGTTCAGTCCG | HL41847  | 1841  | 0.3139      | 0.3412635  | 0.15040211  | -0.659265   | 0.2338788  | 0.011844193  |
| MAPK6 | NM_002748_b01120.8 | ACCTAAAAGGACCGGATGTAACTTTCATTCCTGATTAAGGTTAAAGTTCAGTCCG | HL41847  | 7217  | 0.326475    | 0.3234474  | 0.1291134   | -0.638626   | 0.2199561  | 0.01242203   |
| MAPK6 | NM_002748_b01120.9 | ACCTAAAAGGACCGGATGTAACTTTCATTCCTGATTAAGGTTAAAGTTCAGTCCG | HL41847  | 12593 | 0.1375      | 0.3801701  | 0.15939518  | -0.449125   | 0.242774   | 0.01062923   |
| MAPK7 | NM_139033_b02711.1 | ACCTAAAAGGACCGGATGTAACTTTCATTCCTGATTAAGGTTAAAGTTCAGTCCG | HL50136  | 7501  | -0.3904233  | 0.4225777  | 0.1334421   | 0.113025    | 0.64327294 | 0.74049201   |
| MAPK7 | NM_139033_b02711.2 | ACCTAAAAGGACCGGATGTAACTTTCATTCCTGATTAAGGTTAAAGTTCAGTCCG | HL50136  | 2125  | -0.2688     |            |             |             |            |              |
| MAPK7 | NM_139033_b02711.3 | ACCTAAAAGGACCGGATGTAACTTTCATTCCTGATTAAGGTTAAAGTTCAGTCCG | HL50136  | 6024  | -0.10975    | 0.8894786  | 0.02804209  | -0.0668     | 0.5769624  | 0.08660592   |
| MAPK8 | NM_002750_b0662.1  | ACCTAAAAGGACCGGATGTAACTTTCATTCCTGATTAAGGTTAAAGTTCAGTCCG | HL52204  | 1400  | -0.27325    | 0.4534411  | 0.26593022  | -0.4145     | 0.25951823 | 0.06118324   |
| MAPK8 | NM_002750_b0662.2  | ACCTAAAAGGACCGGATGTAACTTTCATTCCTGATTAAGGTTAAAGTTCAGTCCG | HL52204  | 12595 | 0.14567     | 0.0771882  | 0.67218979  | -0.299125   | 0.3550789  | 0.33588997   |
| MAPK8 | NM_002750_b0662.3  | ACCTAAAAGGACCGGATGTAACTTTCATTCCTGATTAAGGTTAAAGTTCAGTCCG | HL52204  | 252   | -1.172      | 1.3720366  | 0.14566728  | -0.5988785  | 0.54151707 | 0.072194368  |
| MAPK8 | NM_002750_b0662.4  | ACCTAAAAGGACCGGATGTAACTTTCATTCCTGATTAAGGTTAAAGTTCAGTCCG | HL52204  | 2628  | 0.0000000   | 0.0000000  | 0.0000000   | 0.0000000   | 0.0000000  | 0.0000000    |
| MAPK8 | NM_002750_b0662.5  | ACCTAAAAGGACCGGATGTAACTTTCATTCCTGATTAAGGTTAAAGTTCAGTCCG | HL52204  | 11004 | -0.09733333 | 1.2972614  | 0.17646973  | -0.525215   | 0.5738665  | 0.11125761   |
| MAPK8 | NM_002750_b0662.6  | ACCTAAAAGGACCGGATGTAACTTTCATTCCTGATTAAGGTTAAAGTTCAGTCCG | HL52204  | 1845  | 2.332       | 0.1057781  | 0.14136979  | -0.457475   | 0.44387945 | 0.01124213   |
| MAPK8 | NM_002750_b0662.7  | ACCTAAAAGGACCGGATGTAACTTTCATTCCTGATTAAGGTTAAAGTTCAGTCCG | HL52204  | 7221  | 1.90914667  | 2.7927919  | 0.17201665  | -0.498125   | 0.4643682  | 0.08779522   |
| MAPK8 | NM_002750_b0662.8  | ACCTAAAAGGACCGGATGTAACTTTCATTCCTGATTAAGGTTAAAGTTCAGTCCG | HL52204  | 12597 | 1.97775     | 1.9811242  | 0.0964365   | -0.5638785  | 0.44411081 | 0.05779014   |
| MAPK8 | NM_139069_b01146.1 | ACCTAAAAGGACCGGATGTAACTTTCATTCCTGATTAAGGTTAAAGTTCAGTCCG | HL48431  | 6039  | 0.294       | 0.2438809  | 0.154015    | 0.373875    | 0.6435082  | 0.28359102   |
| MAPK8 | NM_139069_b01146.2 | ACCTAAAAGGACCGGATGTAACTTTCATTCCTGATTAAGGTTAAAGTTCAGTCCG | HL48431  | 11415 | 0.307825    | 0.2715152  | 0.12388069  | 0.21456667  | 0.46052591 | 0.55180481   |
| MAPK8 | NM_139069_b01146.3 | ACCTAAAAGGACCGGATGTAACTTTCATTCCTGATTAAGGTTAAAGTTCAGTCCG | HL48431  | 6413  | 0.39825     |            |             |             |            |              |
| MAPK8 | NM_139069_b01146.4 | ACCTAAAAGGACCGGATGTAACTTTCATTCCTGATTAAGGTTAAAGTTCAGTCCG | HL48431  | 604   | 0.57925     | 0.6061495  | 0.08214037  | -0.24075    | 0.4188712  | 0.30654237   |
| MAPK8 | NM_139069_b01146.5 | ACCTAAAAGGACCGGATGTAACTTTCATTCCTGATTAAGGTTAAAGTTCAGTCCG | HL48431  | 640   | 0.3296      | 0.4507012  | 0.0564688   | -0.0275     | 0.4516071  | 0.0038038    |
| MAPK8 | NM_139069_b01146.6 | ACCTAAAAGGACCGGATGTAACTTTCATTCCTGATTAAGGTTAAAGTTCAGTCCG | HL48431  | 11416 | 0.5461      | 0.859248   | 0.116478178 | 0.02026     | 0.5861438  | 0.0096118    |
| MAPK8 | NM_139069_b01146.7 | ACCTAAAAGGACCGGATGTAACTTTCATTCCTGATTAAGGTTAAAGTTCAGTCCG | HL48431  | 2131  | 3.7075      | 0.4042724  | 0.11020744  | 0.7145      | 1.2548169  | 0.3421064    |
| MAPK8 | NM_139069_b01146.8 | ACCTAAAAGGACCGGATGTAACTTTCATTCCTGATTAAGGTTAAAGTTCAGTCCG | HL48431  | 7807  | 0.2325      | 2.6966243  | 0.09692322  | 0.32655     | 1.185713   | 0.44529164   |
| MAPK8 | NM_139069_b01146.9 | ACCTAAAAGGACCGGATGTAACTTTCATTCCTGATTAAGGTTAAAGTTCAGTCCG | HL48431  | 12883 | 2.9725      | 2.5161887  | 0.05906232  | 1.576       |            |              |
| MAPK8 | NM_004759_b01317.1 | ACCTAAAAGGACCGGATGTAACTTTCATTCCTGATTAAGGTTAAAGTTCAGTCCG | HL50276  | 314   | 0.14567     | 0.0771882  | 0.67218979  | -0.299125   | 0.3550789  | 0.33588997   |
| MAPK8 | NM_004759_b01317.2 | ACCTAAAAGGACCGGATGTAACTTTCATTCCTGATTAAGGTTAAAGTTCAGTCCG | HL50276  | 5710  | 0.62        | 1.0625643  | 0.08559903  | 0.7216643   | 1.3846187  | 0.31471335   |
| MAPK8 | NM_004759_b01317.3 | ACCTAAAAGGACCGGATGTAACTTTCATTCCTGATTAAGGTTAAAGTTCAGTCCG | HL50276  | 11008 | -0.18252    | 0.5868268  | 0.09991457  | 0.3111239   | 0.1848604  | 0.51470908   |
| MAPK8 | NM_004759_b01317.4 | ACCTAAAAGGACCGGATGTAACTTTCATTCCTGATTAAGGTTAAAGTTCAGTCCG | HL50276  | 335   | 0.06215     | 1.2357942  | 0.14604288  | -0.65333333 | 2.81548603 | 0.03762722   |
| MAPK8 | NM_004759_b01317.5 | ACCTAAAAGGACCGGATGTAACTTTCATTCCTGATTAAGGTTAAAGTTCAGTCCG | HL50276  | 5711  | 0.02285     | 1.3398439  | 0.62947541  | -0.1986     | 0.4761023  | 0.02905604   |
| MAPK8 | NM_004759_b01317.6 | ACCTAAAAGGACCGGATGTAACTTTCATTCCTGATTAAGGTTAAAGTTCAGTCCG | HL50276  | 11007 | 0.38        | 0.484384   | 0.18721938  | -0.81971928 | 0.9207488  | 0.18814969   |
| MAPK8 | NM_004759_b01317.7 | ACCTAAAAGGACCGGATGTAACTTTCATTCCTGATTAAGGTTAAAGTTCAGTCCG | HL50276  | 336   | -0.44125    | 0.622088   | 0.16542945  | -0.4978     | 1.5252911  | 0.5134925    |
| MAPK8 | NM_004759_b01317.8 | ACCTAAAAGGACCGGATGTAACTTTCATTCCTGATTAAGGTTAAAGTTCAGTCCG | HL50276  | 5712  | -0.5395     |            |             |             | 1.45473106 | 0.0176026    |
| MAPK8 | NM_004759_b01317.9 | ACCTAAAAGGACCGGATGTAACTTTCATTCCTGATTAAGGTTAAAGTTCAGTCCG | HL50276  | 11008 | -0.67825    | 0.7264362  | 0.07996411  | -0.7488667  | 1.6667845  | 0.38013828   |
| MAPK8 | NM_004835_b0466.1  | ACCTAAAAGGACCGGATGTAACTTTCATTCCTGATTAAGGTTAAAGTTCAGTCCG | HL24521  | 318   | 0.0000000   | 0.0000000  | 0.0000000   | 0.0000000   | 0.0000000  | 0.0000000    |
| MAPK8 | NM_004835_b0466.2  | ACCTAAAAGGACCGGATGTAACTTTCATTCCTGATTAAGGTTAAAGTTCAGTCCG | HL24521  | 5686  | -0.8765     | 0.8325382  | 0.05798933  | 1.84536667  | 0.8300872  | 0.01565058   |
| MAPK8 | NM_004835_b0466.3  | ACCTAAAAGGACCGGATGTAACTTTCATTCCTGATTAAGGTTAAAGTTCAGTCCG | HL24521  | 11063 | -0.0000000  | 0.0000000  | 0.0000000   | 0.0000000   | 0.0000000  | 0.0000000    |
| MAPK8 | NM_004835_b0466.4  | ACCTAAAAGGACCGGATGTAACTTTCATTCCTGATTAAGGTTAAAGTTCAGTCCG | HL24521  | 1878  | -0.042      | 0.411777   | 0.0312196   | 1.0499      | 1.0157281  | 0.20758827   |
| MAPK8 | NM_004835_b0466.5  | ACCTAAAAGGACCGGATGTAACTTTCATTCCTGATTAAGGTTAAAGTTCAGTCCG | HL24521  | 7254  | -0.089      | 0.6477876  | 0.77037015  | -1.4931333  | 2.1631378  | 0.24929268   |
| MAPK8 | NM_004835_b0466.6  | ACCTAAAAGGACCGGATGTAACTTTCATTCCTGATTAAGGTTAAAGTTCAGTCCG | HL24521  | 12630 | 0.0000000   | 0.0000000  | 0.0000000   | 0.0000000   | 0.0000000  | 0.0000000    |
| MAPK8 | NM_004835_b0466.7  | ACCTAAAAGGACCGGATGTAACTTTCATTCCTGATTAAGGTTAAAGTTCAGTCCG | HL24521  | 12632 |             |            |             | -4.968      |            |              |
| MAPK8 | NM_004835_b0466.8  | ACCTAAAAGGACCGGATGTAACTTTCATTCCTGATTAAGGTTAAAGTTCAGTCCG | HL413901 | 6041  | -1.83746667 | 0.3387228  | 0.001039487 | 0.96635     | 0.4388852  | 0.00913323   |
| MAPK8 | NM_139078_b01516.1 | ACCTAAAAGGACCGGATGTAACTTTCATTCCTGATTAAGGTTAAAGTTCAGTCCG | HL413901 | 11417 | 0.808       |            |             |             |            |              |
| MAPK8 | NM_139078_b01516.2 | ACCTAAAAGGACCGGATGTAACTTTCATTCCTGATTAAGGTTAAAGTTCAGTCCG | HL413901 | 666   | -0.67025    | 0.5445483  | 0.77071043  | 0.145175    | 0.217037   | 0.40080241   |
| MAPK8 | NM_139078_b01516.3 | ACCTAAAAGGACCGGATGTAACTTTCATTCCTGATTAAGGTTAAAGTTCAGTCCG | HL413901 | 6042  | -0.00275    | 0.5432892  | 0.99133733  | 0.33475     | 0.2147485  | 0.01049996   |
| MAPK8 | NM_139078_b01516.4 | ACCTAAAAGGACCGGATGTAACTTTCATTCCTGATTAAGGTTAAAGTTCAGTCCG | HL413901 | 11418 | 0.88182     | 0.8241341  | 0.77228248  | 0.39275     | 0.2229342  | 0.06425754   |
| MAPK8 | NM_139078_b01516.5 | ACCTAAAAGGACCGGATGTAACTTTCATTCCTGATTAAGGTTAAAGTTCAGTCCG | HL413901 | 12885 | 0.86825     | 0.2616873  | 0.2840134   | 0.324       | 1.7865517  | 0.1824311    |
| MAPK8 | NM_139078_b01516.6 | ACCTAAAAGGACCGGATGTAACTTTCATTCCTGATTAAGGTTAAAGTTCAGTCCG | HL413901 | 2133  | 0.0000000   | 0.0000000  | 0.0000000   | 0.0000000   | 0.0000000  | 0.0000000    |
| MAPK8 | NM_139078_b01516.7 | ACCTAAAAGGACCGGATGTAACTTTCATTCCTGATTAAGGTTAAAGTTCAGTCCG | HL413901 | 7509  | -0.80825    | 0.2616873  | 0.2840134   | 0.324       | 1.7865517  | 0.1824311    |
| MAPK8 | NM_139078_b01516.8 | ACCTAAAAGGACCGGATGTAACTTTCATTCCTGATTAAGGTTAAAGTTCAGTCCG | HL413901 | 2892  | -0.3920375  |            |             | 0.1781      |            |              |
| MAPK8 | NM_139078_b01516.9 | ACCTAAAAGGACCGGATGTAACTTTCATTCCTGATTAAGGTTAAAGTTCAGTCCG | HL413901 | 9279  | -0.210875   | 0.8905708  | 0.5919459   |             |            |              |
| MAPK8 | NM_A02505_b01016.1 | ACCTAAAAGGACCGGATGTAACTTTCATTCCTGATTAAGGTTAAAGTTCAGTCCG | HL91701  | 14651 | -0.251925   | 0.1802268  | 0.13771215  |             |            |              |
| MAPK8 | NM_A02505_b01016.2 | ACCTAAAAGGACCGGATGTAACTTTCATTCCTGATTAAGGTTAAAGTTCAGTCCG | HL91701  | 3061  | -0.351725   | 0.7676947  | 0.06419908  |             |            |              |
| MAPK8 | NM_A02505_b01016.3 | ACCTAAAAGGACCGGATGTAACTTTCATTCCTGATTAAGGTTAAAGTTCAGTCCG | HL91701  | 9277  | 1.437025    | 0.7995169  | 0           |             |            |              |













|       |                    |                                                         |         |       |             |            |             |            |            |             |             |            |             |
|-------|--------------------|---------------------------------------------------------|---------|-------|-------------|------------|-------------|------------|------------|-------------|-------------|------------|-------------|
| NABSF | BC04998_361007_R   | ACCTAAAAGGCGCCAGATTCATCTCATCTCTGATGAGTACAGCTATCTCGGGGGG | HL32284 | 4292  | -0.699325   | 0.15466073 | 0.00783468  | -0.33965   | 0.2260902  | 0.09140273  | 0.303866667 | 0.48173138 | 0.33683047  |
| NABSF | BC04998_361008_R   | ACCTAAAAGGCGCCAGATTCATCTCATCTCTGATGAGTACAGCTATCTCGGGGGG | HL32284 | 7658  | 0.2080561   | 0.13762422 | 0.00801833  | -0.4882625 | 0.2306165  | 0.10853233  | 0.4882625   | 0.74200047 | 0.34200047  |
| NABSF | BC04998_361009_R   | ACCTAAAAGGCGCCAGATTCATCTCATCTCTGATGAGTACAGCTATCTCGGGGGG | HL32284 | 15044 | -0.658478   | 0.25093338 | 0.00954484  | -0.64995   | 0.55880188 | 0.06161016  | 0.36133333  | 0.5332412  | 0.35117863  |
| NABSF | BC04998_361296_R   | ACCTAAAAGGCGCCAGATTCATCTCATCTCTGATGAGTACAGCTATCTCGGGGGG | HL32284 | 4290  | 0.188125    | 0.14400002 | 0.00844722  | -0.7775    | 0.2400999  | 0.00259999  | 0.1096      | 0.2760263  | 0.2760263   |
| NABSF | BC04998_361297_R   | ACCTAAAAGGCGCCAGATTCATCTCATCTCTGATGAGTACAGCTATCTCGGGGGG | HL32284 | 9666  | 1.584575    | 0.49529325 | 0.02067482  | -0.66095   | 0.42809662 | 0.00961692  | 0.31366667  | 0.5139455  | 0.432668318 |
| NABSF | BC04998_362199_R   | ACCTAAAAGGCGCCAGATTCATCTCATCTCTGATGAGTACAGCTATCTCGGGGGG | HL32284 | 15942 | 1.602725    | 0.44400202 | 0.00964472  | -0.7775    | 0.2400999  | 0.00259999  | 0.1096      | 0.2760263  | 0.2760263   |
| NABSF | BC04998_362496_R   | ACCTAAAAGGCGCCAGATTCATCTCATCTCTGATGAGTACAGCTATCTCGGGGGG | HL32284 | 4294  | 0.8915      | 0.6654032  | 0.02489666  | -0.862975  | 0.26249723 | 0.07867029  | 0.33772222  | 0.50429247 | 0.442929407 |
| NABSF | BC04998_362498_R   | ACCTAAAAGGCGCCAGATTCATCTCATCTCTGATGAGTACAGCTATCTCGGGGGG | HL32284 | 9670  | 0.97515     | 0.75270831 | 0.02793133  | 0.83998    | 0.06014048 | 0.05590701  | 0.7139      |            |             |
| NABSF | BC04998_362499_R   | ACCTAAAAGGCGCCAGATTCATCTCATCTCTGATGAGTACAGCTATCTCGGGGGG | HL32284 | 15946 | 0.8090255   | 0.48400002 | 0.00844722  | -0.7775    | 0.2400999  | 0.00259999  | 0.1096      | 0.2760263  | 0.2760263   |
| NB2AL | NK_219104_361912_R | ACCTAAAAGGCGCCAGATTCATCTCATCTCTGATGAGTACAGCTATCTCGGGGGG | HL43743 | 3766  | -0.1829     | 0.51775365 | 0.09572819  | 0.00000    | 0.64131793 | 0.00411987  |             |            |             |
| NB2AL | NK_219104_361913_R | ACCTAAAAGGCGCCAGATTCATCTCATCTCTGATGAGTACAGCTATCTCGGGGGG | HL43743 | 9143  | 0.1522      | 0.10400002 | 0.00844722  | -0.7775    | 0.2400999  | 0.00259999  | 0.1096      | 0.2760263  | 0.2760263   |
| NB2AL | NK_219104_361914_R | ACCTAAAAGGCGCCAGATTCATCTCATCTCTGATGAGTACAGCTATCTCGGGGGG | HL43743 | 14518 | -0.49066667 | 0.6415611  | 0.10424388  |            |            |             | -1.2544625  | 0.4142239  | 0.51025491  |
| NB2AL | NK_219104_361915_R | ACCTAAAAGGCGCCAGATTCATCTCATCTCTGATGAGTACAGCTATCTCGGGGGG | HL43743 | 3794  | -0.846125   | 0.4236398  | 0.00972227  |            |            |             | -0.1634626  | 0.7125002  | 0.61078278  |
| NB2AL | NK_219104_361916_R | ACCTAAAAGGCGCCAGATTCATCTCATCTCTGATGAGTACAGCTATCTCGGGGGG | HL43743 | 9170  | 0.0941      | 0.37224200 | 0.00907771  |            |            |             | 0.032461    | 0.43200000 | 0.86612706  |
| NB2AL | NK_219104_361917_R | ACCTAAAAGGCGCCAGATTCATCTCATCTCTGATGAGTACAGCTATCTCGGGGGG | HL43743 | 14546 | -0.7792     | 0.36117988 | 0.00930754  |            |            |             | -0.0751425  | 0.7904262  | 0.68732043  |
| NB2AL | NK_219104_361918_R | ACCTAAAAGGCGCCAGATTCATCTCATCTCTGATGAGTACAGCTATCTCGGGGGG | HL43743 | 3768  | 0.2227      | 0.28564262 | 0.154349709 |            |            |             | 0.00005     | 0.81948389 | 0.810207069 |
| NB2AL | NK_219104_361919_R | ACCTAAAAGGCGCCAGATTCATCTCATCTCTGATGAGTACAGCTATCTCGGGGGG | HL43743 | 9144  | 0.662125    | 0.87728811 | 0.127597735 |            |            |             | 0.5562425   | 0.64524666 | 0.90712308  |
| NB2AL | NK_219104_361920_R | ACCTAAAAGGCGCCAGATTCATCTCATCTCTGATGAGTACAGCTATCTCGGGGGG | HL43743 | 14520 | 0.1523      | 0.37440005 | 0.04580062  |            |            |             | 0.00005     | 0.30319929 | 0.29606452  |
| NBN   | BX64816_361676_R   | ACCTAAAAGGCGCCAGATTCATCTCATCTCTGATGAGTACAGCTATCTCGGGGGG | HL49208 | 4350  | 1.12395     | 0.18233053 | 0.18705201  |            |            |             | -1.033      |            |             |
| NBN   | BX64816_361677_R   | ACCTAAAAGGCGCCAGATTCATCTCATCTCTGATGAGTACAGCTATCTCGGGGGG | HL49208 | 15187 | 0.7978      | 1.07225872 | 0.21396621  | 0.7084     | 0.37859547 | 0.159103996 | -1.0191     |            |             |
| NBN   | BX64816_361678_R   | ACCTAAAAGGCGCCAGATTCATCTCATCTCTGATGAGTACAGCTATCTCGGGGGG | HL49208 | 9726  | 0.5262      | 0.20072662 | 0.32381875  |            |            |             |             |            |             |
| NBN   | BX64816_361703_R   | ACCTAAAAGGCGCCAGATTCATCTCATCTCTGATGAGTACAGCTATCTCGGGGGG | HL49208 | 4348  | 1.79075     | 1.45464649 | 0.02653172  | 1.97826    | 0.63728666 | 0.00158508  | 0.30193333  | 1.0250445  | 0.888283104 |
| NBN   | BX64816_361704_R   | ACCTAAAAGGCGCCAGATTCATCTCATCTCTGATGAGTACAGCTATCTCGGGGGG | HL49208 | 9724  | 2.1106      | 1.531959   | 0.00977941  | 2.023125   | 0.39632075 | 0.8995      | 0.8252466   | 0.61099977 |             |
| NBN   | BX64816_361705_R   | ACCTAAAAGGCGCCAGATTCATCTCATCTCTGATGAGTACAGCTATCTCGGGGGG | HL49208 | 15100 | 1.9853      | 1.85109598 | 0.04117249  | 1.978475   | 0.83405775 | 0.00249815  | 0.7204      | 0.9633131  | 1.043781002 |
| NBN   | BX64816_362495_R   | ACCTAAAAGGCGCCAGATTCATCTCATCTCTGATGAGTACAGCTATCTCGGGGGG | HL49208 | 4346  | -0.243975   | 0.43040262 | 0.154349709 | -0.71385   | 0.39132044 | 0.03094645  | 0.00005     | 0.81948389 | 0.810207069 |
| NBN   | BX64816_362496_R   | ACCTAAAAGGCGCCAGATTCATCTCATCTCTGATGAGTACAGCTATCTCGGGGGG | HL49208 | 9722  | -0.32373    | 0.40403941 | 0.161997541 | -0.104575  | 0.2078931  | 0.0018202   | 0.3378      | 1.5140869  | 0.59184452  |
| NBN   | BX64816_362497_R   | ACCTAAAAGGCGCCAGATTCATCTCATCTCTGATGAGTACAGCTATCTCGGGGGG | HL49208 | 15998 | 0.15075     | 0.40225662 | 0.154349709 | -0.9991    | 0.39737027 | 0.00946907  | -0.13933    | 0.7048667  | 0.71942659  |
| NC0A1 | NK_147233_361175_R | ACCTAAAAGGCGCCAGATTCATCTCATCTCTGATGAGTACAGCTATCTCGGGGGG | HL41293 | 4797  | -0.537175   | 0.1331788  | 0.01192893  | -0.4675875 | 0.9327738  | 0.3088806   |             |            |             |
| NC0A1 | NK_147233_361176_R | ACCTAAAAGGCGCCAGATTCATCTCATCTCTGATGAGTACAGCTATCTCGGGGGG | HL41293 | 10173 | -0.464125   | 0.1813808  | 0.00541493  | -0.636265  | 0.7079628  | 0.1098286   |             |            |             |
| NC0A1 | NK_147233_361177_R | ACCTAAAAGGCGCCAGATTCATCTCATCTCTGATGAGTACAGCTATCTCGGGGGG | HL41293 | 15549 | -0.491875   | 0.14800019 | 0.0173385   | -0.4557875 | 0.75743104 | 0.23799973  |             |            |             |
| NC0A1 | NK_147233_361484_R | ACCTAAAAGGCGCCAGATTCATCTCATCTCTGATGAGTACAGCTATCTCGGGGGG | HL41293 | 4799  | 0.084475    | 0.43736591 | 0.70797367  | -0.259975  | 0.5889328  | 0.38797091  |             |            |             |
| NC0A1 | NK_147233_361485_R | ACCTAAAAGGCGCCAGATTCATCTCATCTCTGATGAGTACAGCTATCTCGGGGGG | HL41293 | 10175 | 0.0914125   | 0.1327662  | 0.00699841  | -0.235562  | 0.6189835  | 0.44770272  |             |            |             |
| NC0A1 | NK_147233_361486_R | ACCTAAAAGGCGCCAGATTCATCTCATCTCTGATGAGTACAGCTATCTCGGGGGG | HL41293 | 15551 | 0.408375    | 0.2585161  | 0.05436005  | -0.007125  | 1.0548149  | 0.98805445  |             |            |             |
| NC0A1 | NK_147233_361688_R | ACCTAAAAGGCGCCAGATTCATCTCATCTCTGATGAGTACAGCTATCTCGGGGGG | HL41293 | 4795  | 1.1667625   | 0.1407925  | 0.00299391  | -0.5295735 | 0.58992675 | 0.118001147 |             |            |             |
| NC0A1 | NK_147233_361689_R | ACCTAAAAGGCGCCAGATTCATCTCATCTCTGATGAGTACAGCTATCTCGGGGGG | HL41293 | 10171 | 1.0265625   | 0.5251428  | 0.00793704  | -0.7409125 | 0.5387248  | 0.038110195 |             |            |             |
| NC0A1 | NK_147233_361690_R | ACCTAAAAGGCGCCAGATTCATCTCATCTCTGATGAGTACAGCTATCTCGGGGGG | HL41293 | 15547 | 0.408375    | 0.2585161  | 0.05436005  | -0.007125  | 1.0548149  | 0.98805445  |             |            |             |
| NC0A2 | NK_06540_361913_R  | ACCTAAAAGGCGCCAGATTCATCTCATCTCTGATGAGTACAGCTATCTCGGGGGG | HL46678 | 4835  | -0.916375   | 0.2262956  | 0.00201282  | 0.0915125  | 0.4150736  | 0.06743469  |             |            |             |
| NC0A2 | NK_06540_361914_R  | ACCTAAAAGGCGCCAGATTCATCTCATCTCTGATGAGTACAGCTATCTCGGGGGG | HL46678 | 10211 | -1.1522125  | 0.1077000  | 0.0038089   | -0.117325  | 0.3460342  | 0.96039647  |             |            |             |
| NC0A2 | NK_06540_361915_R  | ACCTAAAAGGCGCCAGATTCATCTCATCTCTGATGAGTACAGCTATCTCGGGGGG | HL46678 | 15587 | -0.418475   | 0.1241818  | 0.0021875   | -0.437875  | 0.6544854  | 0.60997191  |             |            |             |
| NC0A2 | NK_06540_362035_R  | ACCTAAAAGGCGCCAGATTCATCTCATCTCTGATGAGTACAGCTATCTCGGGGGG | HL46678 | 4833  | 3.899875    | 0.5899913  | 0.004475    | 1.312475   | 0.4752162  | 0.00341936  |             |            |             |
| NC0A2 | NK_06540_362036_R  | ACCTAAAAGGCGCCAGATTCATCTCATCTCTGATGAGTACAGCTATCTCGGGGGG | HL46678 | 10209 | 0.4647625   | 0.1327662  | 0.00699841  | -0.235562  | 0.6189835  | 0.44770272  |             |            |             |
| NC0A2 | NK_06540_362037_R  | ACCTAAAAGGCGCCAGATTCATCTCATCTCTGATGAGTACAGCTATCTCGGGGGG | HL46678 | 15585 | 3.9920125   | 0.4992525  | 1.116       | 1.1922625  | 0.4295878  | 0.00328169  |             |            |             |
| NC0A2 | NK_06540_362697_R  | ACCTAAAAGGCGCCAGATTCATCTCATCTCTGATGAGTACAGCTATCTCGGGGGG | HL46678 | 4831  | -0.463875   | 0.1493848  | 0.0021875   | -0.437875  | 0.6544854  | 0.60997191  |             |            |             |
| NC0A2 | NK_06540_362698_R  | ACCTAAAAGGCGCCAGATTCATCTCATCTCTGATGAGTACAGCTATCTCGGGGGG | HL46678 | 10207 | 0.0087625   | 0.4118184  | 0.76652893  | 0.2962626  | 0.8790918  | 0.47815126  |             |            |             |
| NC0A2 | NK_06540_362699_R  | ACCTAAAAGGCGCCAGATTCATCTCATCTCTGATGAGTACAGCTATCTCGGGGGG | HL46678 | 15548 | -0.437875   | 0.1493848  | 0.0021875   | -0.437875  | 0.6544854  | 0.60997191  |             |            |             |
| NC0A2 | NK_06540_362699_R  | ACCTAAAAGGCGCCAGATTCATCTCATCTCTGATGAGTACAGCTATCTCGGGGGG | HL46678 | 4831  | -0.463875   | 0.1493848  | 0.0021875   | -0.437875  | 0.6544854  | 0.60997191  |             |            |             |
| NC0A2 | NK_06540_362699_R  | ACCTAAAAGGCGCCAGATTCATCTCATCTCTGATGAGTACAGCTATCTCGGGGGG | HL46678 | 10207 | 0.0087625   | 0.4118184  | 0.76652893  | 0.2962626  | 0.8790918  | 0.47815126  |             |            |             |
| NC0A2 | NK_06540_362699_R  | ACCTAAAAGGCGCCAGATTCATCTCATCTCTGATGAGTACAGCTATCTCGGGGGG | HL46678 | 15548 | -0.437875   | 0.1493848  | 0.0021875   | -0.437875  | 0.6544854  | 0.60997191  |             |            |             |
| NC0A2 | NK_06540_362699_R  | ACCTAAAAGGCGCCAGATTCATCTCATCTCTGATGAGTACAGCTATCTCGGGGGG | HL46678 | 4831  | -0.463875   | 0.1493848  | 0.0021875   | -0.437875  | 0.6544854  | 0.60997191  |             |            |             |
| NC0A2 | NK_06540_362699_R  | ACCTAAAAGGCGCCAGATTCATCTCATCTCTGATGAGTACAGCTATCTCGGGGGG | HL46678 | 10207 | 0.0087625   | 0.4118184  | 0.76652893  | 0.2962626  | 0.8790918  | 0.47815126  |             |            |             |
| NC0A2 | NK_06540_362699_R  | ACCTAAAAGGCGCCAGATTCATCTCATCTCTGATGAGTACAGCTATCTCGGGGGG | HL46678 | 15548 | -0.437875   | 0.1493848  | 0.0021875   | -0.437875  | 0.6544854  | 0.60997191  |             |            |             |
| NC0A2 | NK_06540_362699_R  | ACCTAAAAGGCGCCAGATTCATCTCATCTCTGATGAGTACAGCTATCTCGGGGGG | HL46678 | 4831  | -0.463875   | 0.1493848  | 0.0021875   | -0.437875  | 0.6544854  | 0.60997191  |             |            |             |
| NC0A2 | NK_06540_362699_R  | ACCTAAAAGGCGCCAGATTCATCTCATCTCTGATGAGTACAGCTATCTCGGGGGG | HL46678 | 10207 | 0.0087625   | 0.4118184  | 0.76652893  | 0.2962626  | 0.8790918  | 0.47815126  |             |            |             |
| NC0A2 | NK_06540_362699_R  | ACCTAAAAGGCGCCAGATTCATCTCATCTCTGATGAGTACAGCTATCTCGGGGGG | HL46678 | 15548 | -0.437875   | 0.1493848  | 0.0021875   | -0.437875  | 0.6544854  | 0.60997191  |             |            |             |
| NC0A2 | NK_06540_362699_R  | ACCTAAAAGGCGCCAGATTCATCTCATCTCTGATGAGTACAGCTATCTCGGGGGG | HL46678 | 4831  | -0.463875   | 0.1493848  | 0.0021875   | -0.437875  | 0.6544854  | 0.60997191  |             |            |             |
| NC0A2 | NK_06540_362699_R  | ACCTAAAAGGCGCCAGATTCATCTCATCTCTGATGAGTACAGCTATCTCGGGGGG | HL46678 | 10207 | 0.0087625   | 0.4118184  | 0.76652893  | 0.2962626  | 0.8790918  | 0.47815126  |             |            |             |
| NC0A2 | NK_06540_362699_R  | ACCTAAAAGGCGCCAGATTCATCTCATCTCTGATGAGTACAGCTATCTCGGGGGG | HL46678 | 15548 | -0.437875   | 0.1493848  | 0.0021875   | -0.437875  | 0.6544854  | 0.60997191  |             |            |             |
| NC0A2 | NK_06540_362699_R  | ACCTAAAAGGCGCCAGATTCATCTCATCTCTGATGAGTACAGCTATCTCGGGGGG | HL46678 | 4831  | -0.463875   | 0.1493848  | 0.0021875   | -0.437875  | 0.6544854  | 0.60997191  |             |            |             |
| NC0A2 | NK_06540_362699_R  | ACCTAAAAGGCGCCAGATTCATCTCATCTCTGATGAGTACAGCTATCTCGGGGGG | HL46678 | 10207 | 0.0087625   | 0.4118184  | 0.76652893  | 0.2962626  | 0.8790918  | 0.47815126  |             |            |             |
| NC0A2 | NK_06540_362699_R  | ACCTAAAAGGCGCCAGATTCATCTCATCTCTGATGAGTACAGCTATCTCGGGGGG | HL46678 | 15548 | -0.437875   | 0.1493848  | 0.0021875   | -0.437875  | 0.6544854  | 0.60997191  |             |            |             |
| NC0A2 | NK_06540_362699_R  | ACCTAAAAGGCGCCAGATTCATCTCATCTCTGATGAGTACAGCTATCTCGGGGGG | HL46678 | 4831  | -0.463875   | 0.1493848  | 0.0021875   | -0.437875  | 0.6544854  | 0.60997191  |             |            |             |
| NC0A2 | NK_06540_362699_R  | ACCTAAAAGGCGCCAGATTCATCTCATCTCTGATGAGTACAGCTATCTCGGGGGG | HL46678 | 10207 | 0.0087625   | 0.4118184  | 0.76652893  | 0.2962626  | 0.8790918  | 0.47815126  |             |            |             |
| NC0A2 | NK_06540_362699_R  | ACCTAAAAGGCGCCAGATTCATCTCATCTCTGATGAGTACAGCTATCTCGGGGGG | HL46678 | 15548 | -0.437875   | 0.1493848  | 0.0021875   | -0.437875  | 0.6544854  | 0.60997191  |             |            |             |
| NC0A2 | NK_06540_362699_R  | ACCTAAAAGGCGCCAGATTCATCTCATCTCTGATGAGTACAGCTATCTCGGGGGG | HL46678 | 4831  | -0.463875   | 0.1493848  | 0.0021875   | -0.437875  | 0.6544854  | 0.60997191  |             |            |             |
| NC0A2 | NK_06540_362699_R  | ACCTAAAAGGCGCCAGATTCATCTCATCTCTGATGAGTACAGCTATCTCGGGGGG | HL46678 | 10207 | 0.0087625   | 0.4118184  | 0.76652893  | 0.2962626  | 0.8790918  | 0.47815126  |             |            |             |



|        |                   |                                                           |          |       |             |           |             |            |            |             |
|--------|-------------------|-----------------------------------------------------------|----------|-------|-------------|-----------|-------------|------------|------------|-------------|
| NME1   | NM_198175_16712_R | ACGTAAAGAGGATGGCTGTGGTTGTCATCTTGTGAAGAACCAACAGCCGATCTCCGG | HL463456 | 2008  | 1.0592875   | 0.3909355 | 0.003890443 | 0.2107875  | 0.2015944  | 0.3173565   |
| NME1   | NM_198175_16712_R | ACGTAAAGAGGATGGCTGTGGTTGTCATCTTGTGAAGAACCAACAGCCGATCTCCGG | HL463456 | 7384  | 1.0022623   | 0.3712432 | 0.0037664   | 0.2607464  | 0.2637087  | 0.3173565   |
| NME1   | NM_198175_16712_R | ACGTAAAGAGGATGGCTGTGGTTGTCATCTTGTGAAGAACCAACAGCCGATCTCCGG | HL463456 | 12760 | 1.0022623   | 0.3712432 | 0.0037664   | 0.2607464  | 0.2637087  | 0.3173565   |
| NME1   | NM_198175_16712_R | ACGTAAAGAGGATGGCTGTGGTTGTCATCTTGTGAAGAACCAACAGCCGATCTCCGG | HL463456 | 15177 | 1.0022623   | 0.3712432 | 0.0037664   | 0.2607464  | 0.2637087  | 0.3173565   |
| NMU    | NM_00681_16212_R  | ACGTAAAGAGGATGGCTGTGGTTGTCATCTTGTGAAGAACCAACAGCCGATCTCCGG | HL463456 | 10713 | 1.085125    | 0.2211302 | 0.1038185   | -0.512415  | 1.0049318  | 0.2923671   |
| NMU    | NM_00681_16212_R  | ACGTAAAGAGGATGGCTGTGGTTGTCATCTTGTGAAGAACCAACAGCCGATCTCCGG | HL46387  | 16989 | 0.431775    | 0.3184006 | 0.17178917  | -0.775275  | 1.1858343  | 0.2924166   |
| NMU    | NM_00681_16212_R  | ACGTAAAGAGGATGGCTGTGGTTGTCATCTTGTGAAGAACCAACAGCCGATCTCCGG | HL46387  | 513   | -1.348187   | 0.1861396 | 0.0556124   | -0.208826  | 0.6457824  | 0.512486669 |
| NMU    | NM_00681_16212_R  | ACGTAAAGAGGATGGCTGTGGTTGTCATCTTGTGAAGAACCAACAGCCGATCTCCGG | HL46387  | 10711 | -0.375625   | 0.0772880 | 0.0363731   | -0.057375  | 0.5249975  | 0.82012759  |
| NMU    | NM_00681_16212_R  | ACGTAAAGAGGATGGCTGTGGTTGTCATCTTGTGAAGAACCAACAGCCGATCTCCGG | HL46387  | 16987 | 1.3643075   | 0.2409011 | 0.0000000   | 0.2409011  | 0.0000000  | 0.0000000   |
| NMU    | NM_00681_16413_R  | ACGTAAAGAGGATGGCTGTGGTTGTCATCTTGTGAAGAACCAACAGCCGATCTCCGG | HL46387  | 5339  | -0.4738975  | 0.3661124 | 0.0562934   | -0.6739625 | 0.2181482  | 0.0124184   |
| NMU    | NM_00681_16413_R  | ACGTAAAGAGGATGGCTGTGGTTGTCATCTTGTGAAGAACCAACAGCCGATCTCCGG | HL46387  | 16991 | -0.3821375  | 0.2991242 | 0.0000000   | -0.2991242 | 0.0000000  | 0.0000000   |
| NMU    | NM_00681_16413_R  | ACGTAAAGAGGATGGCTGTGGTTGTCATCTTGTGAAGAACCAACAGCCGATCTCCGG | HL46387  | 16991 | -0.15475    | 0.1709292 | -0.4763     | 0.4718958  | 0.0000000  | 0.0000000   |
| NOD3   | NM_17884_16212_R  | ACGTAAAGAGGATGGCTGTGGTTGTCATCTTGTGAAGAACCAACAGCCGATCTCCGG | HL59201  | 1520  | -0.074175   | 0.2041729 | 0.9142151   | 0.7004125  | 0.6340770  | 0.03071307  |
| NOD3   | NM_17884_16212_R  | ACGTAAAGAGGATGGCTGTGGTTGTCATCTTGTGAAGAACCAACAGCCGATCTCCGG | HL59201  | 6906  | 0.097125    | 0.1558474 | 0.793792574 | 0.6642975  | 0.6111752  | 0.06708112  |
| NOD3   | NM_17884_16212_R  | ACGTAAAGAGGATGGCTGTGGTTGTCATCTTGTGAAGAACCAACAGCCGATCTCCGG | HL59201  | 12272 | 0.003075    | 0.2391763 | 0.61892251  | 0.6344877  | 0.6188860  | 0.57440871  |
| NOD3   | NM_17884_16212_R  | ACGTAAAGAGGATGGCTGTGGTTGTCATCTTGTGAAGAACCAACAGCCGATCTCCGG | HL59201  | 1521  | 1.41565     |           |             | 0.4812375  | 0.7425506  | 0.14742457  |
| NOD3   | NM_17884_16212_R  | ACGTAAAGAGGATGGCTGTGGTTGTCATCTTGTGAAGAACCAACAGCCGATCTCCGG | HL59201  | 6897  | -1.48576667 | 0.1513806 | 0.00145878  | 0.2628125  | 0.7605869  | 0.37702491  |
| NOD3   | NM_17884_16212_R  | ACGTAAAGAGGATGGCTGTGGTTGTCATCTTGTGAAGAACCAACAGCCGATCTCCGG | HL59201  | 12273 | -0.7916667  | 0.2939367 | 0.0014918   | 0.4812375  | 0.7425506  | 0.14742457  |
| NOD3   | NM_17884_16212_R  | ACGTAAAGAGGATGGCTGTGGTTGTCATCTTGTGAAGAACCAACAGCCGATCTCCGG | HL59201  | 2646  | 0.951025    | 0.3863461 | 0.0006381   | -0.853785  | 0.3625899  | 0.01052783  |
| NOD3   | NM_17884_16212_R  | ACGTAAAGAGGATGGCTGTGGTTGTCATCTTGTGAAGAACCAACAGCCGATCTCCGG | HL59201  | 8622  | -1.01375    | 0.3170766 | 0.0073969   | -0.798987  | 0.395313   | 0.01422736  |
| NOD3   | NM_17884_16212_R  | ACGTAAAGAGGATGGCTGTGGTTGTCATCTTGTGAAGAACCAACAGCCGATCTCCGG | HL59201  | 1398  | 0.330045    | 0.3505455 | 0.005404    | -0.709887  | 0.3225559  | 0.01885533  |
| NOTCH1 | NM_01767_16240_R  | ACGTAAAGAGGATGGCTGTGGTTGTCATCTTGTGAAGAACCAACAGCCGATCTCCGG | HL49473  | 3434  | 0.416475    | 0.6392171 | 0.19554048  | -0.5939875 | 0.4632189  | 0.04036703  |
| NOTCH1 | NM_01767_16240_R  | ACGTAAAGAGGATGGCTGTGGTTGTCATCTTGTGAAGAACCAACAGCCGATCTCCGG | HL49473  | 8810  | 0.48325     | 0.7027819 | 0.3088799   | -0.620512  | 0.4573262  | 0.041642076 |
| NOTCH1 | NM_01767_16240_R  | ACGTAAAGAGGATGGCTGTGGTTGTCATCTTGTGAAGAACCAACAGCCGATCTCCGG | HL49473  | 14188 | 0.481725    | 0.6603377 | 0.1531662   | -0.4870375 | 0.5149199  | 0.10418274  |
| NOTCH1 | NM_01767_16240_R  | ACGTAAAGAGGATGGCTGTGGTTGTCATCTTGTGAAGAACCAACAGCCGATCTCCGG | HL49473  | 3498  | 0.403025    | 0.6191338 | 0.0410386   | 0.32232625 | 0.34054193 | 0.345431024 |
| NOTCH1 | NM_01767_16240_R  | ACGTAAAGAGGATGGCTGTGGTTGTCATCTTGTGAAGAACCAACAGCCGATCTCCGG | HL49473  | 8784  | -0.68585    | 0.3847059 | 0.02039479  | 0.1866265  | 0.35744    | 0.402154734 |
| NOTCH1 | NM_01767_16240_R  | ACGTAAAGAGGATGGCTGTGGTTGTCATCTTGTGAAGAACCAACAGCCGATCTCCGG | HL49473  | 14180 | -0.592      | 0.3220726 | 0.0228035   | -0.2142625 | 0.3422706  | 0.10444036  |
| NPAS1  | BC03916_16131_R   | ACGTAAAGAGGATGGCTGTGGTTGTCATCTTGTGAAGAACCAACAGCCGATCTCCGG | HL7564   | 4276  | -0.204725   | 0.3679358 | 0.3358181   | -0.8624    | 0.13115896 | 0.00213671  |
| NPAS1  | BC03916_16131_R   | ACGTAAAGAGGATGGCTGTGGTTGTCATCTTGTGAAGAACCAACAGCCGATCTCCGG | HL7564   | 9652  | -0.14225    | 0.3078698 | 0.4538387   | -0.77925   | 0.1020442  | 0.0086581   |
| NPAS1  | BC03916_16131_R   | ACGTAAAGAGGATGGCTGTGGTTGTCATCTTGTGAAGAACCAACAGCCGATCTCCGG | HL7564   | 15028 | 0.1625      | 0.3113610 | 0.3991170   | -0.9989    | 0.2652839  | 0.01159382  |
| NPAS1  | BC03916_16131_R   | ACGTAAAGAGGATGGCTGTGGTTGTCATCTTGTGAAGAACCAACAGCCGATCTCCGG | HL7564   | 4274  | 0.31285     | 0.1816938 | 0.402102    | -1.689235  | 0.362422   | 0.00088414  |
| NPAS1  | BC03916_16131_R   | ACGTAAAGAGGATGGCTGTGGTTGTCATCTTGTGAAGAACCAACAGCCGATCTCCGG | HL7564   | 9650  | 0.5013333   | 0.9073965 | 0.3056707   | 0.94978    | 0.00484169 | 0.27818206  |
| NPAS1  | BC03916_16131_R   | ACGTAAAGAGGATGGCTGTGGTTGTCATCTTGTGAAGAACCAACAGCCGATCTCCGG | HL7564   | 15026 | 0.4792      | 0.3767479 | 0.046136918 | 1.0301     | 0.2890283  | 0.04881127  |
| NPAS1  | BC03916_16131_R   | ACGTAAAGAGGATGGCTGTGGTTGTCATCTTGTGAAGAACCAACAGCCGATCTCCGG | HL7564   | 4248  | 0.133825    | 0.4875936 | 0.58387583  | -0.19705   | 0.2162374  | 0.20351164  |
| NPAS1  | BC03916_16131_R   | ACGTAAAGAGGATGGCTGTGGTTGTCATCTTGTGAAGAACCAACAGCCGATCTCCGG | HL7564   | 9624  | 0.171       | 0.4870917 | 0.48578981  | -0.36915   | 0.3124629  | 0.10197396  |
| NPAS1  | BC03916_16131_R   | ACGTAAAGAGGATGGCTGTGGTTGTCATCTTGTGAAGAACCAACAGCCGATCTCCGG | HL7564   | 15009 | 0.217775    | 0.4928056 | 0.387117158 | -0.4338    | 0.1380598  | 0.06428232  |
| NPAS1  | BC03916_16131_R   | ACGTAAAGAGGATGGCTGTGGTTGTCATCTTGTGAAGAACCAACAGCCGATCTCCGG | HL7564   | 148   |             |           |             | 1.072      | 0.969932   | 0.043201025 |
| NP1    | NM_00006_162405_R | ACGTAAAGAGGATGGCTGTGGTTGTCATCTTGTGAAGAACCAACAGCCGATCTCCGG | HL49030  | 149   | 0.062       | 0.8020131 | 0.8580443   | -0.4061875 | 0.5653254  | 0.19152569  |
| NP1    | NM_00006_162405_R | ACGTAAAGAGGATGGCTGTGGTTGTCATCTTGTGAAGAACCAACAGCCGATCTCCGG | HL49030  | 5325  | 0.078       | 0.8703768 | 0.9270429   | -0.393255  | 0.5374366  | 0.23074029  |
| NP1    | NM_00006_162405_R | ACGTAAAGAGGATGGCTGTGGTTGTCATCTTGTGAAGAACCAACAGCCGATCTCCGG | HL49030  | 1091  | 0.1266      | 0.8467589 | 0.73378924  | -0.389625  | 0.5747523  | 0.212306289 |
| NP1    | NM_00006_162405_R | ACGTAAAGAGGATGGCTGTGGTTGTCATCTTGTGAAGAACCAACAGCCGATCTCCGG | HL49030  | 1091  | 0.0005      | 0.1511502 | 0.0000000   | 0.0000000  | 0.0000000  | 0.0000000   |
| NP1    | NM_00006_162405_R | ACGTAAAGAGGATGGCTGTGGTTGTCATCTTGTGAAGAACCAACAGCCGATCTCCGG | HL49030  | 5326  | -0.12867    | 0.9114206 | 0.9310559   | -0.490125  | 0.2699104  | 0.002852029 |
| NP1    | NM_00006_162405_R | ACGTAAAGAGGATGGCTGTGGTTGTCATCTTGTGAAGAACCAACAGCCGATCTCCGG | HL49030  | 1091  | -0.07379    | 0.1178576 | 0.80167342  | 0.35575    | 0.1372429  | 0.01524964  |
| NP1    | NM_00006_162405_R | ACGTAAAGAGGATGGCTGTGGTTGTCATCTTGTGAAGAACCAACAGCCGATCTCCGG | HL49030  | 151   | -0.872      |           |             | 0.23184667 | 0.5119633  | 0.4732177   |
| NP2    | NM_00007_162129_R | ACGTAAAGAGGATGGCTGTGGTTGTCATCTTGTGAAGAACCAACAGCCGATCTCCGG | HL7818   | 5527  | -0.6333     |           |             | -0.3995    | 0.1932939  | 0.24520236  |
| NP2    | NM_00007_162129_R | ACGTAAAGAGGATGGCTGTGGTTGTCATCTTGTGAAGAACCAACAGCCGATCTCCGG | HL7818   | 9713  | 0.0000      | 0.2198871 | 0.0000000   | 0.23184667 | 0.5119633  | 0.4732177   |
| NP2    | NM_00007_162129_R | ACGTAAAGAGGATGGCTGTGGTTGTCATCTTGTGAAGAACCAACAGCCGATCTCCGG | HL7818   | 152   | 0.4708      |           |             | 0.2165     |            |             |
| NP2    | NM_00007_162129_R | ACGTAAAGAGGATGGCTGTGGTTGTCATCTTGTGAAGAACCAACAGCCGATCTCCGG | HL7818   | 9308  | 0.5237      |           |             | 0.1273     |            |             |
| NP2    | NM_00007_162129_R | ACGTAAAGAGGATGGCTGTGGTTGTCATCTTGTGAAGAACCAACAGCCGATCTCCGG | HL7818   | 1094  | -0.2805     | 0.7856653 | 0.52076942  | 0.1108     |            |             |
| NP2    | NM_00007_162129_R | ACGTAAAGAGGATGGCTGTGGTTGTCATCTTGTGAAGAACCAACAGCCGATCTCCGG | HL7818   | 9713  | -0.2825     | 0.3078698 | 0.4538387   | -0.77925   | 0.1020442  | 0.0086581   |
| NP2    | NM_00007_162129_R | ACGTAAAGAGGATGGCTGTGGTTGTCATCTTGTGAAGAACCAACAGCCGATCTCCGG | HL7818   | 5529  | -0.953675   | 1.0238016 | 0.0704983   | -0.402625  | 0.4888169  | 0.13866255  |
| NP2    | NM_00007_162129_R | ACGTAAAGAGGATGGCTGTGGTTGTCATCTTGTGAAGAACCAACAGCCGATCTCCGG | HL7818   | 10909 | -0.88975    | 0.7779425 | 0.42721566  | -0.445425  | 0.5396192  | 0.14806367  |
| NP2    | NM_00007_162129_R | ACGTAAAGAGGATGGCTGTGGTTGTCATCTTGTGAAGAACCAACAGCCGATCTCCGG | HL7818   | 3778  |             |           |             |            |            |             |
| NP2    | NM_00007_162129_R | ACGTAAAGAGGATGGCTGTGGTTGTCATCTTGTGAAGAACCAACAGCCGATCTCCGG | HL7818   | 9154  |             |           |             | -0.1621    | 0.1890236  | 0.4036714   |
| NP2    | NM_00007_162129_R | ACGTAAAGAGGATGGCTGTGGTTGTCATCTTGTGAAGAACCAACAGCCGATCTCCGG | HL7818   | 14520 | 0.0135      | 0.3687561 | 0.865039944 | -0.39126   | 0.1917828  | 0.0000000   |
| NP2    | NM_00007_162129_R | ACGTAAAGAGGATGGCTGTGGTTGTCATCTTGTGAAGAACCAACAGCCGATCTCCGG | HL7818   | 3774  | -0.505725   | 0.2914689 | 0.01180007  | -0.1193    | 0.5940145  | 0.0782281   |
| NP2    | NM_00007_162129_R | ACGTAAAGAGGATGGCTGTGGTTGTCATCTTGTGAAGAACCAACAGCCGATCTCCGG | HL7818   | 9150  | -0.40289    | 0.3665015 | 0.0000000   | -0.392625  | 0.3526723  | 0.802776659 |
| NP2    | NM_00007_162129_R | ACGTAAAGAGGATGGCTGTGGTTGTCATCTTGTGAAGAACCAACAGCCGATCTCCGG | HL7818   | 14526 | -0.5862125  | 0.2114035 | 0.02119416  | -0.320525  | 0.3039885  | 0.33882374  |
| NP2    | NM_00007_162129_R | ACGTAAAGAGGATGGCTGTGGTTGTCATCTTGTGAAGAACCAACAGCCGATCTCCGG | HL7818   | 3776  |             |           |             | 0.10275    | 0.3649627  | 0.65282111  |
| NP2    | NM_00007_162129_R | ACGTAAAGAGGATGGCTGTGGTTGTCATCTTGTGAAGAACCAACAGCCGATCTCCGG | HL7818   | 9152  | 1.6164      |           |             | -0.04775   | 0.3199727  | 0.171158053 |
| NP2    | NM_00007_162129_R | ACGTAAAGAGGATGGCTGTGGTTGTCATCTTGTGAAGAACCAACAGCCGATCTCCGG | HL7818   | 14528 |             |           |             |            |            |             |
| NP3    | NM_000176_16114_R | ACGTAAAGAGGATGGCTGTGGTTGTCATCTTGTGAAGAACCAACAGCCGATCTCCGG | HL12296  | 4914  | 0.7846265   | 0.3788004 | 0.05418537  | -0.4599783 | 1.4582500  | 0.482793971 |
| NP3    | NM_000176_16114_R | ACGTAAAGAGGATGGCTGTGGTTGTCATCTTGTGAAGAACCAACAGCCGATCTCCGG | HL12296  | 10330 | 0.799375    | 0.7189707 | 0.0475593   | -0.447425  | 1.3574906  | 0.4714869   |
| NP3    | NM_000176_16114_R | ACGTAAAGAGGATGGCTGTGGTTGTCATCTTGTGAAGAACCAACAGCCGATCTCCGG | HL12296  | 15746 | 0.879126    | 0.7714112 | 0.0924026   | -0.3932625 | 1.4992028  | 0.53897865  |
| NP3    | NM_000176_16114_R | ACGTAAAGAGGATGGCTGTGGTTGTCATCTTGTGAAGAACCAACAGCCGATCTCCGG | HL12296  | 4952  | -0.171425   | 0.4398975 | 0.4593971   | 0.4028875  | 0.3881288  | 0.11217294  |
| NP3    | NM_000176_16114_R | ACGTAAAGAGGATGGCTGTGGTTGTCATCTTGTGAAGAACCAACAGCCGATCTCCGG | HL12296  | 10328 | 0.0000000   | 0.0000000 | 0.0000000   | 0.0000000  | 0.0000000  | 0.0000000   |
| NP3    | NM_000176_16114_R | ACGTAAAGAGGATGGCTGTGGTTGTCATCTTGTGAAGAACCAACAGCCGATCTCCGG | HL12296  | 15704 | -0.087375   | 0.4354685 | 0.69616018  | 0.317626   | 0.3736252  | 0.84761276  |
| NP3    | NM_000176_16114_R | ACGTAAAGAGGATGGCTGTGGTTGTCATCTTGTGAAGAACCAACAGCCGATCTCCGG | HL12296  | 4956  | 1.0418975   | 0.5310488 | 0.0000000   | 0.228625   | 0.5508208  | 0.413197388 |
| NP3    | NM_000176_16114_R | ACGTAAAGAGGATGGCTGTGGTTGTCATCTTGTGAAGAACCAACAGCCGATCTCCGG | HL12296  | 10332 | -0.00882    | 0.0009455 | 0.0000000   | 0.237785   | 0.01639448 | 0.44579229  |
| NP3    | NM_000176_16114_R | ACGTAAAGAGGATGGCTGTGGTTGTCATCTTGTGAAGAACCAACAGCCGATCTCCGG | HL12296  | 15708 | 0.0388075   | 0.571317  | 0.0009674   | 0.235875   | 0.5994743  | 0.41058666  |
| NP3    | NM_000176_16114_R | ACGTAAAGAGGATGGCTGTGGTTGTCATCTTGTGAAGAACCAACAGCCGATCTCCGG | HL12296  | 4958  | 0.19229     | 0.7800497 | 0.07209694  | 0.8925     | 1.1685818  | 0.18171697  |
| NP3    | NM_000176_16114_R | ACGTAAAGAGGATGGCTGTGGTTGTCATCTTGTGAAGAACCAACAGCCGATCTCCGG | HL12296  | 10332 | -0.00882    | 0.0009455 | 0.0000000   | 0.237785   | 0.01639448 | 0.44579229  |
| NP3    | NM_000176_16114_R | ACGTAAAGAGGATGGCTGTGGTTGTCATCTTGTGAAGAACCAACAGCCGATCTCCGG | HL12296  | 15708 | 0.0388075   | 0.571317  | 0.0009674   | 0.235875   | 0.5994743  | 0.41058666  |
| NP3    | NM_000176_16114_R | ACGTAAAGAGGATGGCTGTGGTTGTCATCTTGTGAAGAACCAACAGCCGATCTCCGG | HL12296  | 4958  | 1.0418975   | 0.5310488 | 0.0000000   | 0.228625   | 0.5508208  | 0.413197388 |
| NP3    | NM_000176_16114_R | ACGTAAAGAGGATGGCTGTGGTTGTCATCTTGTGAAGAACCAACAGCCGATCTCCGG | HL12296  | 10332 | -0.00882    | 0.0009455 | 0.0000000   | 0.237785   | 0          |             |







|      |                    |                                                        |          |       |            |             |             |             |            |             |
|------|--------------------|--------------------------------------------------------|----------|-------|------------|-------------|-------------|-------------|------------|-------------|
| PCD2 | NM_144781.16656.6  | ACCTAAAGAGCTGATGATGGGCAATGCTTCTGATCAATTCCTCCATCCGATCGG | HL367900 | 2983  | 7.842075   | 0.51124265  | 0.021938642 | -0.1391375  | 0.27699556 | 0.651147023 |
| PCD2 | NM_144781.16656.6  | ACCTAAAGAGCTGATGATGGGCAATGCTTCTGATCAATTCCTCCATCCGATCGG | HL367900 | 8339  | 0.7121     | 0.4972268   | 0.021938642 | 0.1391375   | 0.27699556 | 0.651147023 |
| PCD2 | NM_144781.16656.6  | ACCTAAAGAGCTGATGATGGGCAATGCTTCTGATCAATTCCTCCATCCGATCGG | HL367900 | 13735 | 0.76023    | 0.55210307  | 0.021938642 | 0.1391375   | 0.27699556 | 0.651147023 |
| PCD2 | NM_144781.16656.6  | ACCTAAAGAGCTGATGATGGGCAATGCTTCTGATCAATTCCTCCATCCGATCGG | HL367900 | 2366  | 0.140725   | 0.44131728  | 0.021938642 | 0.1391375   | 0.27699556 | 0.651147023 |
| PCD2 | NM_144781.16656.6  | ACCTAAAGAGCTGATGATGGGCAATGCTTCTGATCAATTCCTCCATCCGATCGG | HL367900 | 8337  | -1.17665   | 0.33022189  | 0.020218866 | 0.4092625   | 0.5107176  | 0.12320414  |
| PCD2 | NM_144781.16656.6  | ACCTAAAGAGCTGATGATGGGCAATGCTTCTGATCAATTCCTCCATCCGATCGG | HL367900 | 13733 | -0.02755   | 0.58422207  | 0.023249915 | 0.3282375   | 0.52321659 | 0.20204656  |
| PCD2 | NM_144781.16656.6  | ACCTAAAGAGCTGATGATGGGCAATGCTTCTGATCAATTCCTCCATCCGATCGG | HL367900 | 2985  | 0.398      | 0.44425524  | 0.021938642 | 0.1391375   | 0.27699556 | 0.651147023 |
| PCD2 | NM_144781.16656.6  | ACCTAAAGAGCTGATGATGGGCAATGCTTCTGATCAATTCCTCCATCCGATCGG | HL367900 | 13737 | -1.168265  | 0.35381326  | 0.002462909 | 0.1192375   | 0.64272302 | 0.66179005  |
| PCD4 | BX137500.160111.8  | ACCTAAAGAGCTGATGATGGGCAATGCTTCTGATCAATTCCTCCATCCGATCGG | HL323543 | 4593  | -0.0057    | 0.61448182  | 0.08440117  | -0.13033133 | 0.2990198  | 0.6086025   |
| PCD4 | BX137500.160111.8  | ACCTAAAGAGCTGATGATGGGCAATGCTTCTGATCAATTCCTCCATCCGATCGG | HL323543 | 9989  | 0.2197     | 0.4972268   | 0.021938642 | 0.1391375   | 0.27699556 | 0.651147023 |
| PCD4 | BX137500.160111.8  | ACCTAAAGAGCTGATGATGGGCAATGCTTCTGATCAATTCCTCCATCCGATCGG | HL323543 | 15345 | -0.3195    | 0.77874468  | 0.38114417  | -0.096265   | 0.5212994  | 0.1996      |
| PCD4 | BX137500.160111.8  | ACCTAAAGAGCTGATGATGGGCAATGCTTCTGATCAATTCCTCCATCCGATCGG | HL323543 | 4591  | -0.2005    | 0.61262708  | 0.330571009 | 0.07195     | 0.61262708 | 0.330571009 |
| PCD4 | BX137500.160111.8  | ACCTAAAGAGCTGATGATGGGCAATGCTTCTGATCAATTCCTCCATCCGATCGG | HL323543 | 9967  | 0.140725   | 0.44131728  | 0.021938642 | 0.1391375   | 0.27699556 | 0.651147023 |
| PCD4 | BX137500.160111.8  | ACCTAAAGAGCTGATGATGGGCAATGCTTCTGATCAATTCCTCCATCCGATCGG | HL323543 | 15343 | 0.2185     | 0.48815521  | 0.38364142  | 0.28925     | 0.76601556 | 0.43470071  |
| PCD4 | BX137500.160111.8  | ACCTAAAGAGCTGATGATGGGCAATGCTTCTGATCAATTCCTCCATCCGATCGG | HL323543 | 4595  | 0.398      | 0.44425524  | 0.021938642 | 0.1391375   | 0.27699556 | 0.651147023 |
| PCD4 | BX137500.160111.8  | ACCTAAAGAGCTGATGATGGGCAATGCTTCTGATCAATTCCTCCATCCGATCGG | HL323543 | 9971  | -0.196275  | 0.2720265   | 0.29288185  | -1.089285   | 0.4191819  | 0.00497673  |
| PCD8 | NM_004208.160493.8 | ACCTAAAGAGCTGATGATGGGCAATGCTTCTGATCAATTCCTCCATCCGATCGG | HL442932 | 2182  | -0.758785  | 0.60700101  | 0.03804448  | 0.1880785   | 1.3973135  | 0.31866995  |
| PCD8 | NM_004208.160493.8 | ACCTAAAGAGCTGATGATGGGCAATGCTTCTGATCAATTCCTCCATCCGATCGG | HL442932 | 7588  | -0.748875  | 0.50271088  | 0.03312782  | 0.3807485   | 1.3771919  | 0.28074654  |
| PCD8 | NM_004208.160493.8 | ACCTAAAGAGCTGATGATGGGCAATGCTTCTGATCAATTCCTCCATCCGATCGG | HL442932 | 12934 | -0.737375  | 0.38592939  | 0.017300466 | 0.3957375   | 1.1348575  | 0.30260986  |
| PCD8 | NM_004208.160493.8 | ACCTAAAGAGCTGATGATGGGCAATGCTTCTGATCAATTCCTCCATCCGATCGG | HL442932 | 817   | -0.738075  | 0.30296066  | 0.08241205  | -0.1668265  | 0.3227377  | 0.46238308  |
| PCD8 | NM_004208.160493.8 | ACCTAAAGAGCTGATGATGGGCAATGCTTCTGATCAATTCCTCCATCCGATCGG | HL442932 | 6213  | -0.4398875 | 0.22994969  | 0.03778503  | 0.11273628  | 0.2130073  | 0.51792784  |
| PCD8 | NM_004208.160493.8 | ACCTAAAGAGCTGATGATGGGCAATGCTTCTGATCAATTCCTCCATCCGATCGG | HL442932 | 1589  | -0.3718625 | 0.31513343  | 0.005947649 | -0.1468875  | 0.20112542 | 0.48246814  |
| PCD8 | NM_004208.160493.8 | ACCTAAAGAGCTGATGATGGGCAATGCTTCTGATCAATTCCTCCATCCGATCGG | HL442932 | 658   | -0.939025  | 0.16083614  | 0.001376113 | -0.0898125  | 0.41165054 | 0.37037997  |
| PCD8 | NM_004208.160493.8 | ACCTAAAGAGCTGATGATGGGCAATGCTTCTGATCAATTCCTCCATCCGATCGG | HL442932 | 6214  | -0.914215  | 0.2371927   | 0.002145231 | -0.1001125  | 0.391856   | 0.67195881  |
| PCD8 | NM_004208.160493.8 | ACCTAAAGAGCTGATGATGGGCAATGCTTCTGATCAATTCCTCCATCCGATCGG | HL442932 | 11580 | -0.1552525 | 0.26556551  | 0.001581267 | -0.1552525  | 0.3970044  | 0.8202556   |
| PE4D | NM_002603.160116.8 | ACCTAAAGAGCTGATGATGGGCAATGCTTCTGATCAATTCCTCCATCCGATCGG | HL591763 | 3449  | 1.219775   | 0.4090947   | 0.001005119 | 0.184375    | 0.6309065  | 0.54151479  |
| PE4D | NM_002603.160116.8 | ACCTAAAGAGCTGATGATGGGCAATGCTTCTGATCAATTCCTCCATCCGATCGG | HL591763 | 8825  | 1.1401     | 0.0937214   | 0.00087125  | 0.1132625   | 0.7137149  | 0.82612124  |
| PE4D | NM_002603.160116.8 | ACCTAAAGAGCTGATGATGGGCAATGCTTCTGATCAATTCCTCCATCCGATCGG | HL591763 | 14201 | 1.006      | 0.1617026   | 0.000941845 | 0.0466875   | 0.66234384 | 0.896627366 |
| PE4D | NM_002603.160116.8 | ACCTAAAGAGCTGATGATGGGCAATGCTTCTGATCAATTCCTCCATCCGATCGG | HL591763 | 3447  | 1.2071     | 0.70302812  | 0.010144772 | 0.0886375   | 0.9400225  | 0.83214349  |
| PE4D | NM_002603.160116.8 | ACCTAAAGAGCTGATGATGGGCAATGCTTCTGATCAATTCCTCCATCCGATCGG | HL591763 | 8823  | 1.089      | 0.77493039  | 0.020881115 | 0.0548475   | 0.14972248 | 0.7804178   |
| PE4D | NM_002603.160116.8 | ACCTAAAGAGCTGATGATGGGCAATGCTTCTGATCAATTCCTCCATCCGATCGG | HL591763 | 14199 | -1.167375  | 0.5503076   | 0.03621127  | 0.0972125   | 0.8600919  | 0.79653004  |
| PE4D | NM_002603.160116.8 | ACCTAAAGAGCTGATGATGGGCAATGCTTCTGATCAATTCCTCCATCCGATCGG | HL591763 | 3445  | -0.383225  | 0.7193056   | 0.2846271   | -0.2725125  | 0.1037607  | 0.18931032  |
| PE4D | NM_002603.160116.8 | ACCTAAAGAGCTGATGATGGGCAATGCTTCTGATCAATTCCTCCATCCGATCGG | HL591763 | 8821  | -0.18075   | 0.2784488   | 0.00951107  | -0.3524625  | 0.3381932  | 0.51246911  |
| PE4D | NM_002603.160116.8 | ACCTAAAGAGCTGATGATGGGCAATGCTTCTGATCAATTCCTCCATCCGATCGG | HL591763 | 14197 | -0.149725  | 0.5503076   | 0.03621127  | -0.2781225  | 0.34751219 | 0.03793956  |
| PE8A | AK12770.160313.8   | ACCTAAAGAGCTGATGATGGGCAATGCTTCTGATCAATTCCTCCATCCGATCGG | HL47927  | 4075  | -0.12175   | 0.2996551   | 0.02998111  | -0.5025     | 0.2819743  | 0.04560229  |
| PE8A | AK12770.160313.8   | ACCTAAAGAGCTGATGATGGGCAATGCTTCTGATCAATTCCTCCATCCGATCGG | HL47927  | 9451  | -0.260785  | 0.11324721  | 0.119131585 | -0.39225    | 0.3034628  | 0.13420014  |
| PE8A | AK12770.160313.8   | ACCTAAAGAGCTGATGATGGGCAATGCTTCTGATCAATTCCTCCATCCGATCGG | HL47927  | 14827 | -0.292175  | 0.1891016   | 0.10394194  | -0.141925   | 0.2151427  | 0.17120604  |
| PE8A | AK12770.160313.8   | ACCTAAAGAGCTGATGATGGGCAATGCTTCTGATCAATTCCTCCATCCGATCGG | HL47927  | 4073  | -0.282175  | 0.6417575   | 0.359476623 | 0.074425    | 0.50692025 | 0.77562385  |
| PE8A | AK12770.160313.8   | ACCTAAAGAGCTGATGATGGGCAATGCTTCTGATCAATTCCTCCATCCGATCGG | HL47927  | 9449  | -1.762625  | 0.833149395 | 0.021938642 | -0.141925   | 0.1037607  | 0.18931032  |
| PE8A | AK12770.160313.8   | ACCTAAAGAGCTGATGATGGGCAATGCTTCTGATCAATTCCTCCATCCGATCGG | HL47927  | 14825 | -0.316875  | 0.4771765   | 0.12066653  | -0.509725   | 0.4809253  | 0.07862428  |
| PE8A | AK12770.160313.8   | ACCTAAAGAGCTGATGATGGGCAATGCTTCTGATCAATTCCTCCATCCGATCGG | HL47927  | 4071  | -0.238125  | 0.2282825   | 0.02998111  | -0.428125   | 0.37409021 | 0.2204931   |
| PE8A | AK12770.160313.8   | ACCTAAAGAGCTGATGATGGGCAATGCTTCTGATCAATTCCTCCATCCGATCGG | HL47927  | 9447  | -0.387375  | 0.2268414   | 0.05641207  | -0.182625   | 0.401925   | 0.67569982  |
| PE8A | AK12770.160313.8   | ACCTAAAGAGCTGATGATGGGCAATGCTTCTGATCAATTCCTCCATCCGATCGG | HL47927  | 14823 | -0.185875  | 0.11541127  | 0.11541127  | -0.185875   | 0.1812695  | 0.41275001  |
| PE8A | AK12770.160313.8   | ACCTAAAGAGCTGATGATGGGCAATGCTTCTGATCAATTCCTCCATCCGATCGG | HL47927  | 1054  | -0.958375  | 0.2872538   | 0.002441378 | -0.1068125  | 0.4613178  | 0.64561956  |
| PE8A | AK12770.160313.8   | ACCTAAAGAGCTGATGATGGGCAATGCTTCTGATCAATTCCTCCATCCGATCGG | HL591070 | 6450  | -0.960875  | 0.32021259  | 0.003005499 | -0.0897375  | 0.45831111 | 0.72813739  |
| PE8A | NM_002607.160117.8 | ACCTAAAGAGCTGATGATGGGCAATGCTTCTGATCAATTCCTCCATCCGATCGG | HL591070 | 11806 | -0.9509375 | 0.32523824  | 0.003005499 | -0.0897375  | 0.45831111 | 0.72813739  |
| PE8A | NM_002607.160117.8 | ACCTAAAGAGCTGATGATGGGCAATGCTTCTGATCAATTCCTCCATCCGATCGG | HL591070 | 1994  | -1.132825  | 0.5980355   | 0.04700012  | -0.246375   | 0.30709294 | 0.09011812  |
| PE8A | NM_002607.160117.8 | ACCTAAAGAGCTGATGATGGGCAATGCTTCTGATCAATTCCTCCATCCGATCGG | HL591070 | 7320  | -0.970225  | 0.4813925   | 0.001990613 | -0.141925   | 0.1037607  | 0.18931032  |
| PE8A | NM_002607.160117.8 | ACCTAAAGAGCTGATGATGGGCAATGCTTCTGATCAATTCCTCCATCCGATCGG | HL591070 | 12746 | -1.093225  | 0.6319384   | 0.051578276 | -0.141925   | 0.1037607  | 0.18931032  |
| PE8A | NM_002607.160117.8 | ACCTAAAGAGCTGATGATGGGCAATGCTTCTGATCAATTCCTCCATCCGATCGG | HL591070 | 6451  | -0.958375  | 0.32523824  | 0.003005499 | -0.0897375  | 0.45831111 | 0.72813739  |
| PE8A | NM_002607.160117.8 | ACCTAAAGAGCTGATGATGGGCAATGCTTCTGATCAATTCCTCCATCCGATCGG | HL591070 | 6452  | -1.233285  | 0.5980355   | 0.000794263 | -0.6027875  | 0.3481556  | 0.03178472  |
| PE8A | NM_002607.160117.8 | ACCTAAAGAGCTGATGATGGGCAATGCTTCTGATCAATTCCTCCATCCGATCGG | HL591070 | 11805 | -1.288125  | 0.3730499   | 0.001717164 | -0.0897375  | 0.45831111 | 0.72813739  |
| PE8A | NM_002607.160117.8 | ACCTAAAGAGCTGATGATGGGCAATGCTTCTGATCAATTCCTCCATCCGATCGG | HL591070 | 1051  | -1.2282375 | 0.2895671   | 0.024289975 | -0.0681225  | 0.44292021 | 0.78088075  |
| PE8A | NM_002608.160113.8 | ACCTAAAGAGCTGATGATGGGCAATGCTTCTGATCAATTCCTCCATCCGATCGG | HL59176  | 6427  | 0.260275   | 0.33139683  | 0.120226611 | -0.073975   | 0.3954628  | 0.74134178  |
| PE8A | NM_002608.160113.8 | ACCTAAAGAGCTGATGATGGGCAATGCTTCTGATCAATTCCTCCATCCGATCGG | HL59176  | 11803 | 0.240875   | 0.4346496   | 0.304299912 | 0.0903875   | 0.44725478 | 0.71860699  |
| PE8A | NM_002608.160113.8 | ACCTAAAGAGCTGATGATGGGCAATGCTTCTGATCAATTCCTCCATCCGATCGG | HL59176  | 1053  | 0.0320025  | 0.14405965  | 0.083482748 | 0.3227125   | 0.36935939 | 0.19494304  |
| PE8A | NM_002608.160113.8 | ACCTAAAGAGCTGATGATGGGCAATGCTTCTGATCAATTCCTCCATCCGATCGG | HL59176  | 6429  | 0.1312625  | 0.1238268   | 0.001990613 | 0.0481      | 0.38755429 | 0.83732309  |
| PE8A | NM_002608.160113.8 | ACCTAAAGAGCTGATGATGGGCAATGCTTCTGATCAATTCCTCCATCCGATCGG | HL59176  | 11805 | -0.009625  | 0.1617744   | 0.049016112 | 0.2251625   | 0.3784774  | 0.35179625  |
| PE8A | NM_002608.160113.8 | ACCTAAAGAGCTGATGATGGGCAATGCTTCTGATCAATTCCTCCATCCGATCGG | HL59176  | 1052  | -0.081875  | 0.24262625  | 0.001990613 | -0.141925   | 0.1037607  | 0.18931032  |
| PE8A | NM_002608.160113.8 | ACCTAAAGAGCTGATGATGGGCAATGCTTCTGATCAATTCCTCCATCCGATCGG | HL59176  | 6428  | -0.663125  | 0.3441961   | 0.01599443  | -0.5702375  | 0.4273651  | 0.05308138  |
| PE8A | NM_002608.160113.8 | ACCTAAAGAGCTGATGATGGGCAATGCTTCTGATCAATTCCTCCATCCGATCGG | HL59176  | 11804 | -0.676125  | 0.18624798  | 0.01582609  | -0.500125   | 0.4714085  | 0.06116142  |
| PE8A | NM_002608.160113.8 | ACCTAAAGAGCTGATGATGGGCAATGCTTCTGATCAATTCCTCCATCCGATCGG | HL59176  | 3540  | -1.2721225 | 0.219138    | 0.15464208  | -0.640875   | 0.4124127  | 0.86542005  |
| PE8A | NM_002608.160113.8 | ACCTAAAGAGCTGATGATGGGCAATGCTTCTGATCAATTCCTCCATCCGATCGG | HL59176  | 11805 | 0.463125   | 0.34473275  | 0.054735957 | 0.042425    | 0.4145473  | 0.85982428  |
| PE8A | NM_002608.160113.8 | ACCTAAAGAGCTGATGATGGGCAATGCTTCTGATCAATTCCTCCATCCGATCGG | HL59176  | 14202 | -0.059375  | 0.09000313  | 0.00504487  | -0.0481     | 0.38755429 | 0.83732309  |
| PE8A | NM_002608.160113.8 | ACCTAAAGAGCTGATGATGGGCAATGCTTCTGATCAATTCCTCCATCCGATCGG | HL59176  | 3542  | -1.292125  | 0.4889393   | 0.02082878  | -0.0475     | 0.3376859  | 0.42407924  |



|       |                    |                                                         |          |        |             |            |             |             |            |             |
|-------|--------------------|---------------------------------------------------------|----------|--------|-------------|------------|-------------|-------------|------------|-------------|
| PFAS1 | AK12879.161995.R   | ACCTAAAAGGTCCTGGATGTATATGCTTTCGACCTTAATTAATCACTGGACGGCC | HL162458 | 15564  | -0.836425   | 1.51303031 | 0.221498522 | 0.6677625   | 0.31737242 | 0.017730494 |
| PFAS2 | BC015190.160771.R  | ACCTAAAAGGTCCTGGATGTATATGCTTTCGACCTTAATTAATCACTGGACGGCC | HL162458 | 4321   | -0.3020251  | 0.00806923 | 0.0000000   | 0.0000000   | 0.0000000  | 0.0000000   |
| PFAS2 | BC015190.160777.R  | ACCTAAAAGGTCCTGGATGTATATGCTTTCGACCTTAATTAATCACTGGACGGCC | HL162458 | 9707   | -0.121325   | 0.54165163 | 0.642388359 | -0.5099785  | 0.13132169 | 0.04328232  |
| PFAS2 | BC015190.160777.R  | ACCTAAAAGGTCCTGGATGTATATGCTTTCGACCTTAATTAATCACTGGACGGCC | HL162458 | 10355  | -0.0000000  | 0.0000000  | 0.0000000   | 0.0000000   | 0.0000000  | 0.0000000   |
| PFAS2 | BC015190.160780.R  | ACCTAAAAGGTCCTGGATGTATATGCTTTCGACCTTAATTAATCACTGGACGGCC | HL162458 | 15081  | -1.199      | 0.11107781 | 0.00272425  | -1.4967     | 0.06528943 | 0.014470488 |
| PFAS3 | NC_006099.161090.R | ACCTAAAAGGTCCTGGATGTATATGCTTTCGACCTTAATTAATCACTGGACGGCC | HL43761  | 4806   | -0.9064625  | 0.4998844  | 0.06730873  | -0.3860263  | 0.11663959 | 0.247615088 |
| PFAS3 | NC_006099.161091.R | ACCTAAAAGGTCCTGGATGTATATGCTTTCGACCTTAATTAATCACTGGACGGCC | HL43761  | 8182   | -0.3964825  | 0.1930878  | 0.045096401 | -0.1252625  | 0.23888784 | 0.489745272 |
| PFAS3 | NC_006099.161092.R | ACCTAAAAGGTCCTGGATGTATATGCTTTCGACCTTAATTAATCACTGGACGGCC | HL43761  | 15558  | -1.3634215  | 2.2079877  | 0.184755081 | 0.2428      | 0.78403398 | 0.319148986 |
| PFAS3 | NC_006099.161093.R | ACCTAAAAGGTCCTGGATGTATATGCTTTCGACCTTAATTAATCACTGGACGGCC | HL43761  | 4802   | 0.7903375   | 0.1787875  | 0.0000000   | 0.0000000   | 0.5597745  | 0.520195157 |
| PFAS3 | NC_006099.161152.R | ACCTAAAAGGTCCTGGATGTATATGCTTTCGACCTTAATTAATCACTGGACGGCC | HL43761  | 10178  | 1.2376625   | 0.3672541  | 0.001252345 | 0.2548785   | 0.44923218 | 0.329105865 |
| PFAS3 | NC_006099.161153.R | ACCTAAAAGGTCCTGGATGTATATGCTTTCGACCTTAATTAATCACTGGACGGCC | HL43761  | 15564  | 0.0000000   | 0.0000000  | 0.0000000   | 0.0000000   | 0.0000000  | 0.0000000   |
| PFAS3 | NC_006099.161154.R | ACCTAAAAGGTCCTGGATGTATATGCTTTCGACCTTAATTAATCACTGGACGGCC | HL43761  | 4804   | 0.1714375   | 1.9921318  | 0.770370006 | 0.1542635   | 0.6653394  | 0.621026425 |
| PFAS3 | NC_006099.161614.R | ACCTAAAAGGTCCTGGATGTATATGCTTTCGACCTTAATTAATCACTGGACGGCC | HL43761  | 10180  | 1.1721375   | 0.9941488  | 0.3068083   | -0.1518133  | 0.9330292  | 0.750482076 |
| PFAS3 | NC_006099.161614.R | ACCTAAAAGGTCCTGGATGTATATGCTTTCGACCTTAATTAATCACTGGACGGCC | HL43761  | 15574  | 0.7096375   | 1.1833698  | 0.49495388  | 0.36275     | 0.7099706  | 0.457612916 |
| PFAS4 | AK022481.161700.R  | ACCTAAAAGGTCCTGGATGTATATGCTTTCGACCTTAATTAATCACTGGACGGCC | HL105779 | 4770   | -0.6320325  | 0.0922483  | 0.005202088 | -0.7620265  | 0.7718047  | 0.081153488 |
| PFAS4 | AK022481.161700.R  | ACCTAAAAGGTCCTGGATGTATATGCTTTCGACCTTAATTAATCACTGGACGGCC | HL105779 | 10146  | -0.6322125  | 1.106786   | 0.91094951  | -0.9560125  | 0.6088112  | 0.02778202  |
| PFAS4 | AK022481.161700.R  | ACCTAAAAGGTCCTGGATGTATATGCTTTCGACCTTAATTAATCACTGGACGGCC | HL105779 | 15522  | -0.5914875  | 0.1237334  | 0.007378425 | -0.9680875  | 0.7328212  | 0.033496985 |
| PFAS4 | AK022481.161985.R  | ACCTAAAAGGTCCTGGATGTATATGCTTTCGACCTTAATTAATCACTGGACGGCC | HL105779 | 4764   | 0.2307875   | 0.3744883  | 0.20737815  | -0.8648875  | 0.7341695  | 0.50560714  |
| PFAS4 | AK022481.161985.R  | ACCTAAAAGGTCCTGGATGTATATGCTTTCGACCTTAATTAATCACTGGACGGCC | HL105779 | 10142  | 0.1588785   | 0.3978368  | 0.46504336  | -0.924375   | 0.6822973  | 0.033418114 |
| PFAS4 | AK022481.161985.R  | ACCTAAAAGGTCCTGGATGTATATGCTTTCGACCTTAATTAATCACTGGACGGCC | HL105779 | 15521  | 0.2668875   | 0.4118989  | 0.22551496  | -0.9704625  | 0.7502895  | 0.00931312  |
| PFAS4 | AK022481.161985.R  | ACCTAAAAGGTCCTGGATGTATATGCTTTCGACCTTAATTAATCACTGGACGGCC | HL105779 | 4758   | 0.7380785   | 0.2455143  | 0.64488085  | -0.2025125  | 0.29638126 | 0.16566508  |
| PFAS4 | AK022481.161985.R  | ACCTAAAAGGTCCTGGATGTATATGCTTTCGACCTTAATTAATCACTGGACGGCC | HL105779 | 10144  | -0.3375375  | 0.2394364  | 0.085978968 | -0.3602875  | 0.3264743  | 0.116090117 |
| PFAS4 | AK022481.161985.R  | ACCTAAAAGGTCCTGGATGTATATGCTTTCGACCTTAATTAATCACTGGACGGCC | HL105779 | 15520  | 0.2668875   | 0.2664198  | 0.20395116  | -0.2968875  | 0.32181838 | 0.181830483 |
| PFAS4 | AK022481.161985.R  | ACCTAAAAGGTCCTGGATGTATATGCTTTCGACCTTAATTAATCACTGGACGGCC | HL105779 | 2182   | 0.661275    | 0.3128181  | 0.01108859  | -0.6213625  | 0.7347416  | 0.115909987 |
| PFAS4 | AK022481.161985.R  | ACCTAAAAGGTCCTGGATGTATATGCTTTCGACCTTAATTAATCACTGGACGGCC | HL105779 | 7758   | 0.5109      | 0.3339364  | 0.01466451  | -0.54569    | 0.0641863  | 0.140700787 |
| PFAS4 | AK022481.161985.R  | ACCTAAAAGGTCCTGGATGTATATGCTTTCGACCTTAATTAATCACTGGACGGCC | HL105779 | 13134  | -0.843125   | 0.3219936  | 0.02505893  | -0.5825625  | 0.7277329  | 0.149446405 |
| PFAS4 | AK022481.161985.R  | ACCTAAAAGGTCCTGGATGTATATGCTTTCGACCTTAATTAATCACTGGACGGCC | HL105779 | 2384   | 1.2778275   | 0.6327088  | 0.00619676  | -0.41421625 | 0.49496256 | 0.175176965 |
| PFAS4 | AK022481.161985.R  | ACCTAAAAGGTCCTGGATGTATATGCTTTCGACCTTAATTAATCACTGGACGGCC | HL105779 | 7760   | -1.1892     | 0.2310977  | 0.000991184 | -0.1381225  | 0.3946518  | 0.688782299 |
| PFAS4 | AK022481.161985.R  | ACCTAAAAGGTCCTGGATGTATATGCTTTCGACCTTAATTAATCACTGGACGGCC | HL105779 | 13138  | -1.058225   | 0.2428562  | 0.00147880  | -0.4081225  | 0.4738669  | 0.88017978  |
| PFAS4 | AK022481.161985.R  | ACCTAAAAGGTCCTGGATGTATATGCTTTCGACCTTAATTAATCACTGGACGGCC | HL105779 | 2380   | 0.5661      | 0.4487314  | 0.07586274  | 0.3052875   | 0.6345018  | 0.274477055 |
| PFAS4 | AK022481.161985.R  | ACCTAAAAGGTCCTGGATGTATATGCTTTCGACCTTAATTAATCACTGGACGGCC | HL105779 | 7756   | 0.5992525   | 0.6980427  | 0.07514222  | 0.2912375   | 0.6697820  | 0.303992807 |
| PFAS4 | AK022481.161985.R  | ACCTAAAAGGTCCTGGATGTATATGCTTTCGACCTTAATTAATCACTGGACGGCC | HL105779 | 13132  | 0.51318     | 0.3081658  | 0.006461282 | -0.4081225  | 0.4738669  | 0.88017978  |
| PFAS4 | AK022481.161985.R  | ACCTAAAAGGTCCTGGATGTATATGCTTTCGACCTTAATTAATCACTGGACGGCC | HL105779 | 131056 | 781         | -1.1766375 | 0.5898906   | -0.0064259  | 0.0468875  | 0.909768137 |
| PFAS4 | AK022481.161985.R  | ACCTAAAAGGTCCTGGATGTATATGCTTTCGACCTTAATTAATCACTGGACGGCC | HL105779 | 131056 | 6157        | -1.1343625 | 0.6015063   | 0.004014942 | 0.0468875  | 0.909768137 |
| PFAS4 | AK022481.161985.R  | ACCTAAAAGGTCCTGGATGTATATGCTTTCGACCTTAATTAATCACTGGACGGCC | HL105779 | 131056 | 15153       | -1.1292575 | 0.54085691  | 0.002897567 | 0.2138     | 0.9294258   |
| PFAS4 | AK022481.161985.R  | ACCTAAAAGGTCCTGGATGTATATGCTTTCGACCTTAATTAATCACTGGACGGCC | HL105779 | 131056 | 2122        | 0.4893875  | 0.1347881   | 0.00054676  | 0.1262925  | 0.7530273   |
| PFAS4 | AK022481.161985.R  | ACCTAAAAGGTCCTGGATGTATATGCTTTCGACCTTAATTAATCACTGGACGGCC | HL105779 | 131056 | 11534       | 0.1489375  | 1.3393142   | 0.00094946  | 2.468225   | 0.12197618  |
| PFAS4 | AK022481.161985.R  | ACCTAAAAGGTCCTGGATGTATATGCTTTCGACCTTAATTAATCACTGGACGGCC | HL105779 | 2082   |             |            |             | -0.978      | 0.5039482  | 0.032029735 |
| PFAS4 | AK022481.161985.R  | ACCTAAAAGGTCCTGGATGTATATGCTTTCGACCTTAATTAATCACTGGACGGCC | HL105779 | 7458   |             |            |             | -0.7172625  | 0.80999125 |             |
| PFAS4 | AK022481.161985.R  | ACCTAAAAGGTCCTGGATGTATATGCTTTCGACCTTAATTAATCACTGGACGGCC | HL105779 | 12834  |             |            |             | -0.82115    | 0.7583912  | 0.16230379  |
| PFAS4 | AK022481.161985.R  | ACCTAAAAGGTCCTGGATGTATATGCTTTCGACCTTAATTAATCACTGGACGGCC | HL105779 | 808    |             |            |             | -0.0000000  | 0.0000000  | 0.0000000   |
| PFAS4 | AK022481.161985.R  | ACCTAAAAGGTCCTGGATGTATATGCTTTCGACCTTAATTAATCACTGGACGGCC | HL105779 | 6274   | -0.4858785  | 0.3078815  | 0.00292324  | -0.01176887 | 0.3611898  | 0.0000000   |
| PFAS4 | AK022481.161985.R  | ACCTAAAAGGTCCTGGATGTATATGCTTTCGACCTTAATTAATCACTGGACGGCC | HL105779 | 11650  | -0.491715   | 0.2680109  | 0.02891233  | 1.271       | 0.3826566  | 0.326887787 |
| PFAS4 | AK022481.161985.R  | ACCTAAAAGGTCCTGGATGTATATGCTTTCGACCTTAATTAATCACTGGACGGCC | HL105779 | 11650  | -0.3688     | 0.36029996 | 0.12700745  | 0.06786667  | 0.3034261  | 0.7889944   |
| PFAS4 | AK022481.161985.R  | ACCTAAAAGGTCCTGGATGTATATGCTTTCGACCTTAATTAATCACTGGACGGCC | HL105779 | 12834  | 1.38785     | 0.6028088  | 0.00248423  | 0.868885    | 0.2078973  | 0.027600007 |
| PFAS4 | AK022481.161985.R  | ACCTAAAAGGTCCTGGATGTATATGCTTTCGACCTTAATTAATCACTGGACGGCC | HL105779 | 2084   | 1.05733333  | 0.3519386  | 0.01109414  | 0.91533333  | 0.45725293 | 0.027664099 |
| PFAS4 | AK022481.161985.R  | ACCTAAAAGGTCCTGGATGTATATGCTTTCGACCTTAATTAATCACTGGACGGCC | HL105779 | 7460   | 0.5194325   | 0.2900000  | 0.0000000   | 0.0000000   | 0.5410681  | 0.0000000   |
| PFAS4 | AK022481.161985.R  | ACCTAAAAGGTCCTGGATGTATATGCTTTCGACCTTAATTAATCACTGGACGGCC | HL105779 | 899    | 0.65415     | 0.1331914  | 0.00534203  | 0.33703333  | 0.5081882  | 0.30141569  |
| PFAS4 | AK022481.161985.R  | ACCTAAAAGGTCCTGGATGTATATGCTTTCGACCTTAATTAATCACTGGACGGCC | HL105779 | 6275   | 0.9458875   | 0.2655038  | 0.00209605  | 0.778925    | 0.1761337  | 0.00444666  |
| PFAS4 | AK022481.161985.R  | ACCTAAAAGGTCCTGGATGTATATGCTTTCGACCTTAATTAATCACTGGACGGCC | HL105779 | 11651  | 0.96983     | 0.2655038  | 0.00209605  | 0.778925    | 0.1761337  | 0.00444666  |
| PFAS4 | AK022481.161985.R  | ACCTAAAAGGTCCTGGATGTATATGCTTTCGACCTTAATTAATCACTGGACGGCC | HL105779 | 6276   | 0.7802575   | 0.9990439  | 0.11244801  | -0.26075    | 0.3512091  | 0.00499487  |
| PFAS4 | AK022481.161985.R  | ACCTAAAAGGTCCTGGATGTATATGCTTTCGACCTTAATTAATCACTGGACGGCC | HL105779 | 11652  | 1.16925     | 0.2620861  | 0.34802003  | -0.121      | 0.3254392  | 0.54449035  |
| PFAS4 | AK022481.161985.R  | ACCTAAAAGGTCCTGGATGTATATGCTTTCGACCTTAATTAATCACTGGACGGCC | HL105779 | 2114   | -0.07966462 | 0.1347881  | 0.0000000   | 0.0000000   | 0.10291783 | 0.18846621  |
| PFAS4 | AK022481.161985.R  | ACCTAAAAGGTCCTGGATGTATATGCTTTCGACCTTAATTAATCACTGGACGGCC | HL105779 | 7400   | 0.014       | 0.4716677  | 0.95878429  | 0.21706667  | 2.2462794  | 0.11466152  |
| PFAS4 | AK022481.161985.R  | ACCTAAAAGGTCCTGGATGTATATGCTTTCGACCTTAATTAATCACTGGACGGCC | HL105779 | 12866  | 0.18894662  | 0.2743786  | 0.0000000   | 0.0000000   | 0.4304     | 0.24604601  |
| PFAS4 | AK022481.161985.R  | ACCTAAAAGGTCCTGGATGTATATGCTTTCGACCTTAATTAATCACTGGACGGCC | HL105779 | 918    | -0.79805    | 0.3090767  | 0.057968392 | -0.3772     | 0.7317839  | 0.0000000   |
| PFAS4 | AK022481.161985.R  | ACCTAAAAGGTCCTGGATGTATATGCTTTCGACCTTAATTAATCACTGGACGGCC | HL105779 | 6314   |             |            |             | 0.8901      |            |             |
| PFAS4 | AK022481.161985.R  | ACCTAAAAGGTCCTGGATGTATATGCTTTCGACCTTAATTAATCACTGGACGGCC | HL105779 | 7462   |             |            |             | 0.0947      |            |             |
| PFAS4 | AK022481.161985.R  | ACCTAAAAGGTCCTGGATGTATATGCTTTCGACCTTAATTAATCACTGGACGGCC | HL105779 | 12868  |             |            |             | 0.2988      |            |             |
| PFAS4 | AK022481.161985.R  | ACCTAAAAGGTCCTGGATGTATATGCTTTCGACCTTAATTAATCACTGGACGGCC | HL105779 | 913    | -0.04665    | 0.4823257  | 0.21294794  | -0.0885     |            |             |
| PFAS4 | AK022481.161985.R  | ACCTAAAAGGTCCTGGATGTATATGCTTTCGACCTTAATTAATCACTGGACGGCC | HL105779 | 6289   | 0.2055      | 0.6497806  | 0.0000000   | 0.0000000   | 0.0000000  | 0.0000000   |
| PFAS4 | AK022481.161985.R  | ACCTAAAAGGTCCTGGATGTATATGCTTTCGACCTTAATTAATCACTGGACGGCC | HL105779 | 11665  | -0.0555     | 0.5816666  | 0.88945081  |             |            |             |
| PFAS4 | AK022481.161985.R  | ACCTAAAAGGTCCTGGATGTATATGCTTTCGACCTTAATTAATCACTGGACGGCC | HL105779 | 6290   |             |            |             |             |            |             |
| PFAS4 | AK022481.161985.R  | ACCTAAAAGGTCCTGGATGTATATGCTTTCGACCTTAATTAATCACTGGACGGCC | HL105779 | 6290   |             |            |             |             |            |             |
| PFAS4 | AK022481.161985.R  | ACCTAAAAGGTCCTGGATGTATATGCTTTCGACCTTAATTAATCACTGGACGGCC | HL105779 | 6291   | -0.268785   | 0.4805742  | 0.24210734  | -0.0779     | 0.4073403  | 0.7473326   |
| PFAS4 | AK022481.161985.R  | ACCTAAAAGGTCCTGGATGTATATGCTTTCGACCTTAATTAATCACTGGACGGCC | HL105779 | 6291   | -0.266      | 0.3930483  | 0.214621171 | 0.078675    | 0.3652933  | 0.70822304  |
| PFAS4 | AK022481.161985.R  | ACCTAAAAGGTCCTGGATGTATATGCTTTCGACCTTAATTAATCACTGGACGGCC | HL105779 | 11667  | -0.138785   | 0.8050312  | 0.69737974  | 0.11335     | 0.4595828  | 0.64018756  |
| PFAS4 | AK022481.161985.R  | ACCTAAAAGGTCCTGGATGTATATGCTTTCGACCTTAATTAATCACTGGACGGCC | HL105779 | 944    | 0.783715    | 0.2655038  | 0.00209605  | 0.622475    | 0.367382   | 0.00499487  |
| PFAS4 | AK022481.161985.R  | ACCTAAAAGGTCCTGGATGTATATGCTTTCGACCTTAATTAATCACTGGACGGCC | HL105779 | 6320   | -0.4646625  | 1.1032892  | 0.34487234  | -0.48864267 | 0.3451051  | 0.7524983   |
| PFAS4 | AK022481.161985.R  | ACCTAAAAGGTCCTGGATGTATATGCTTTCGACCTTAATTAATCACTGGACGGCC | HL105779 | 11666  | 0.0000000   | 0.0000000  | 0.0000000   | 0.0000000   | 0.0000000  | 0.0000000   |
| PFAS4 | AK022481.161985.R  | ACCTAAAAGGTCCTGGATGTATATGCTTTCGACCTTAATTAATCACTGGACGGCC | HL105779 | 945    | -0.34181333 | 0.5144671  | 0.270410933 |             |            |             |
| PFAS4 | AK022481.161985.R  | ACCTAAAAGGTCCTGGATGTATATGCTTTCGACCTTAATTAATCACTGGACGGCC | HL105779 | 6321   |             |            |             | 0.1597      |            |             |
| PFAS4 | AK022481.161985.R  | ACCTAAAAGGTCCTGGATGTATATGCTTTCGACCTTAATTAATCACTGGACGGCC | HL105779 | 11667  | -0.10316667 | 0.4710963  | 0.414802767 |             |            |             |
| PFAS4 | AK022481.161985.R  | ACCTAAAAGGTCCTGGATGTATATGCTTTCGACCTTAATTAATCACTGGACGGCC | HL105779 | 6322   |             |            |             | -0.129      |            |             |
| PFAS4 | AK022481.161985.R  | ACCTAAAAGGTCCTGGATGTATATGCTTTCGACCTTAATTAATCACTGGACGGCC | HL105779 | 11668  | 0.37975     | 1.4702963  | 0.0000000   | 0.0000000   | 0.331826   | 0.73388691  |
| PFAS4 | AK022481.161985.R  | ACCTAAAAGGTCCTGGATGTATATGCTTTCGACCTTAATTAATCACTGGACGGCC | HL105779 |        |             |            |             |             |            |             |





POH NM\_00562\_161142.R ACCTAAAAGCCGAGGATGTGATGATGCTCTTGATGAAATCTTTGATCCCTGGGGG HL439153 15750 1.056875 2.9017407 0.39236417 0.666875 0.05502542 0.005131873





PRDM5 NM\_018699\_161159.8 ACCTAAAGAAACCAACGACACAGGATCTCTGAAATCTCTGATGGATCTGAGCGG... 1.170125 1.15364074 0.037970626 0.19469 0.35985683 0.38634374 0.878425 0.6099047 0.063497966



|       |                    |                                                            |          |       |             |            |             |          |            |            |
|-------|--------------------|------------------------------------------------------------|----------|-------|-------------|------------|-------------|----------|------------|------------|
| PK5H2 | NM_033126.107799_R | ACGTA AAAAGCTCTGCTGGTGTACATATCTCTTGAAATATGTGATCAACCAAGAGGG | HL533044 | 690   | -0.81525    | 0.48710328 | 0.01598867  | 0.199925 | 0.41154488 | 0.39761548 |
| PK5H2 | NM_033126.107799_R | ACGTA AAAAGCTCTGCTGGTGTACATATCTCTTGAAATATGTGATCAACCAAGAGGG | HL533044 | 5976  | -0.5520761  | 0.41095651 | 0.03126872  | 0.482525 | 0.5520811  | 0.50628672 |
| PK5H2 | NM_033126.107799_R | ACGTA AAAAGCTCTGCTGGTGTACATATCTCTTGAAATATGTGATCAACCAAGAGGG | HL533044 | 11352 | 0.8322      | 0.38336477 | 0.02377818  | 0.3945   | 0.11743341 | 0.03978214 |
| PK5H2 | NM_033126.107799_R | ACGTA AAAAGCTCTGCTGGTGTACATATCTCTTGAAATATGTGATCAACCAAGAGGG | HL533044 | 17076 | -0.5549729  | 0.41095651 | 0.03126872  |          |            |            |
| PK5H2 | NM_033126.107799_R | ACGTA AAAAGCTCTGCTGGTGTACATATCTCTTGAAATATGTGATCAACCAAGAGGG | HL533044 | 2076  | 0.4         | 0.18077457 | 0.03139019  |          |            |            |
| PK5H2 | NM_033126.107799_R | ACGTA AAAAGCTCTGCTGGTGTACATATCTCTTGAAATATGTGATCAACCAAGAGGG | HL533044 | 13452 | -0.487375   | 0.13455400 | 0.02656779  |          |            |            |
| PK5H2 | NM_033126.107799_R | ACGTA AAAAGCTCTGCTGGTGTACATATCTCTTGAAATATGTGATCAACCAAGAGGG | HL533044 | 2702  | 0.3375      | 0.23646011 | 0.001440248 |          |            |            |
| PK5H2 | NM_033126.107799_R | ACGTA AAAAGCTCTGCTGGTGTACATATCTCTTGAAATATGTGATCAACCAAGAGGG | HL533044 | 8078  | -1.059775   | 0.2427883  | 0.001496226 |          |            |            |
| PK5H2 | NM_033126.107799_R | ACGTA AAAAGCTCTGCTGGTGTACATATCTCTTGAAATATGTGATCAACCAAGAGGG | HL533044 | 1344  | 0.164       | 0.21134697 | 0.001440248 |          |            |            |
| PK5H2 | NM_033126.107799_R | ACGTA AAAAGCTCTGCTGGTGTACATATCTCTTGAAATATGTGATCAACCAAGAGGG | HL533044 | 2704  | 1.19561333  | 0.24564429 | 0.001496226 |          |            |            |
| PK5H2 | NM_033126.107799_R | ACGTA AAAAGCTCTGCTGGTGTACATATCTCTTGAAATATGTGATCAACCAAGAGGG | HL533044 | 8080  | 0.3         | 0.14481269 | 0.001440248 |          |            |            |
| PK5H2 | NM_033126.107799_R | ACGTA AAAAGCTCTGCTGGTGTACATATCTCTTGAAATATGTGATCAACCAAGAGGG | HL533044 | 13456 | 1.466745    | 0.24265330 | 0.001496226 |          |            |            |
| PK5H2 | NM_033126.107799_R | ACGTA AAAAGCTCTGCTGGTGTACATATCTCTTGAAATATGTGATCAACCAAGAGGG | HL533044 | 2991  | 0.400275    | 0.4392487  | 0.08997284  |          |            |            |
| PK5H2 | NM_033126.107799_R | ACGTA AAAAGCTCTGCTGGTGTACATATCTCTTGAAATATGTGATCAACCAAGAGGG | HL533044 | 8307  | 0.409025    | 0.41309561 | 0.07861021  |          |            |            |
| PK5H2 | NM_033126.107799_R | ACGTA AAAAGCTCTGCTGGTGTACATATCTCTTGAAATATGTGATCAACCAAGAGGG | HL533044 | 13743 | 0.61215     | 0.30724808 | 0.013047956 |          |            |            |
| PK5H2 | NM_033126.107799_R | ACGTA AAAAGCTCTGCTGGTGTACATATCTCTTGAAATATGTGATCAACCAAGAGGG | HL533044 | 2987  | 1.011225    | 0.1512358  | 0.00700648  |          |            |            |
| PK5H2 | NM_033126.107799_R | ACGTA AAAAGCTCTGCTGGTGTACATATCTCTTGAAATATGTGATCAACCAAGAGGG | HL533044 | 8363  | 1.0128      | 0.47509341 | 0.00567427  |          |            |            |
| PK5H2 | NM_033126.107799_R | ACGTA AAAAGCTCTGCTGGTGTACATATCTCTTGAAATATGTGATCAACCAAGAGGG | HL533044 | 13739 | 1.0105      | 0.49209786 | 0.00615236  |          |            |            |
| PK5H2 | NM_033126.107799_R | ACGTA AAAAGCTCTGCTGGTGTACATATCTCTTGAAATATGTGATCAACCAAGAGGG | HL533044 | 13741 | 1.18115     |            |             |          |            |            |
| PK5H2 | NM_033126.107799_R | ACGTA AAAAGCTCTGCTGGTGTACATATCTCTTGAAATATGTGATCAACCAAGAGGG | HL533044 | 8365  |             |            |             |          |            |            |
| PK5H2 | NM_033126.107799_R | ACGTA AAAAGCTCTGCTGGTGTACATATCTCTTGAAATATGTGATCAACCAAGAGGG | HL533044 | 2989  |             |            |             |          |            |            |
| PK5H2 | NM_033126.107799_R | ACGTA AAAAGCTCTGCTGGTGTACATATCTCTTGAAATATGTGATCAACCAAGAGGG | HL533044 | 13747 | -0.0835     |            |             |          |            |            |
| PK5H2 | NM_033126.107799_R | ACGTA AAAAGCTCTGCTGGTGTACATATCTCTTGAAATATGTGATCAACCAAGAGGG | HL533044 | 8371  |             |            |             |          |            |            |
| PK5H2 | NM_033126.107799_R | ACGTA AAAAGCTCTGCTGGTGTACATATCTCTTGAAATATGTGATCAACCAAGAGGG | HL533044 | 2995  |             |            |             |          |            |            |
| PK5H2 | NM_033126.107799_R | ACGTA AAAAGCTCTGCTGGTGTACATATCTCTTGAAATATGTGATCAACCAAGAGGG | HL533044 | 13786 | -0.77215667 | 0.38712469 | 0.04009432  |          |            |            |
| PK5H2 | NM_033126.107799_R | ACGTA AAAAGCTCTGCTGGTGTACATATCTCTTGAAATATGTGATCAACCAAGAGGG | HL533044 | 8369  | 0.6341      | 0.48217611 | 0.17315419  |          |            |            |
| PK5H2 | NM_033126.107799_R | ACGTA AAAAGCTCTGCTGGTGTACATATCTCTTGAAATATGTGATCAACCAAGAGGG | HL533044 | 2997  | 0.568825    | 0.16658137 | 0.01804673  |          |            |            |
| PK5H2 | NM_033126.107799_R | ACGTA AAAAGCTCTGCTGGTGTACATATCTCTTGAAATATGTGATCAACCAAGAGGG | HL533044 | 8373  | 0.37345     | 0.12642807 | 0.01479579  |          |            |            |
| PK5H2 | NM_033126.107799_R | ACGTA AAAAGCTCTGCTGGTGTACATATCTCTTGAAATATGTGATCAACCAAGAGGG | HL533044 | 13749 | 0.56215     | 0.17581208 | 0.02024958  |          |            |            |
| PK5H2 | NM_033126.107799_R | ACGTA AAAAGCTCTGCTGGTGTACATATCTCTTGAAATATGTGATCAACCAAGAGGG | HL533044 | 2978  | 0.1639      | 0.10203815 | 0.02201697  |          |            |            |
| PK5H2 | NM_033126.107799_R | ACGTA AAAAGCTCTGCTGGTGTACATATCTCTTGAAATATGTGATCAACCAAGAGGG | HL533044 | 8375  | 0.147625    | 0.49881745 | 0.014973228 |          |            |            |
| PK5H2 | NM_033126.107799_R | ACGTA AAAAGCTCTGCTGGTGTACATATCTCTTGAAATATGTGATCAACCAAGAGGG | HL533044 | 13751 | 1.433       | 0.9647047  | 0.038100219 |          |            |            |
| PK5H2 | NM_033126.107799_R | ACGTA AAAAGCTCTGCTGGTGTACATATCTCTTGAAATATGTGATCAACCAAGAGGG | HL533044 | 2977  | 0.916425    | 0.70581293 | 0.438       |          |            |            |
| PK5H2 | NM_033126.107799_R | ACGTA AAAAGCTCTGCTGGTGTACATATCTCTTGAAATATGTGATCAACCAAGAGGG | HL533044 | 8403  | 3.01965     | 0.7197325  | 4.40E-05    |          |            |            |
| PK5H2 | NM_033126.107799_R | ACGTA AAAAGCTCTGCTGGTGTACATATCTCTTGAAATATGTGATCAACCAAGAGGG | HL533044 | 13759 | 0.3         | 0.14481269 | 0.001440248 |          |            |            |
| PK5H2 | NM_033126.107799_R | ACGTA AAAAGCTCTGCTGGTGTACATATCTCTTGAAATATGTGATCAACCAAGAGGG | HL533044 | 3025  | 0.624125    | 0.88635786 | 0.11691346  |          |            |            |
| PK5H2 | NM_033126.107799_R | ACGTA AAAAGCTCTGCTGGTGTACATATCTCTTGAAATATGTGATCAACCAAGAGGG | HL533044 | 8401  | 0.516025    | 0.88684257 | 0.160734814 |          |            |            |
| PK5H2 | NM_033126.107799_R | ACGTA AAAAGCTCTGCTGGTGTACATATCTCTTGAAATATGTGATCAACCAAGAGGG | HL533044 | 13777 |             |            |             |          |            |            |
| PK5H2 | NM_033126.107799_R | ACGTA AAAAGCTCTGCTGGTGTACATATCTCTTGAAATATGTGATCAACCAAGAGGG | HL533044 | 8409  |             |            |             |          |            |            |
| PK5H2 | NM_033126.107799_R | ACGTA AAAAGCTCTGCTGGTGTACATATCTCTTGAAATATGTGATCAACCAAGAGGG | HL533044 | 13785 |             |            |             |          |            |            |
| PK5H2 | NM_033126.107799_R | ACGTA AAAAGCTCTGCTGGTGTACATATCTCTTGAAATATGTGATCAACCAAGAGGG | HL533044 | 3033  |             |            |             |          |            |            |
| PK5H2 | NM_033126.107799_R | ACGTA AAAAGCTCTGCTGGTGTACATATCTCTTGAAATATGTGATCAACCAAGAGGG | HL533044 | 8405  | -0.47073    | 0.2713283  | 0.02309267  |          |            |            |
| PK5H2 | NM_033126.107799_R | ACGTA AAAAGCTCTGCTGGTGTACATATCTCTTGAAATATGTGATCAACCAAGAGGG | HL533044 | 13787 | -0.629205   | 0.12182892 | 0.014262808 |          |            |            |
| PK5H2 | NM_033126.107799_R | ACGTA AAAAGCTCTGCTGGTGTACATATCTCTTGAAATATGTGATCAACCAAGAGGG | HL533044 | 3031  | 0.163555    | 0.20783337 | 0.014582623 |          |            |            |
| PK5H2 | NM_033126.107799_R | ACGTA AAAAGCTCTGCTGGTGTACATATCTCTTGAAATATGTGATCAACCAAGAGGG | HL533044 | 8407  | 0.2689      | 0.43920263 | 0.046016638 |          |            |            |
| PK5H2 | NM_033126.107799_R | ACGTA AAAAGCTCTGCTGGTGTACATATCTCTTGAAATATGTGATCAACCAAGAGGG | HL533044 | 13789 | -0.563      | 0.40473420 | 0.025735592 |          |            |            |
| PK5H2 | NM_033126.107799_R | ACGTA AAAAGCTCTGCTGGTGTACATATCTCTTGAAATATGTGATCAACCAAGAGGG | HL533044 | 3035  | 0.4283725   | 0.44862025 | 0.049086739 |          |            |            |
| PK5H2 | NM_033126.107799_R | ACGTA AAAAGCTCTGCTGGTGTACATATCTCTTGAAATATGTGATCAACCAAGAGGG | HL533044 | 8425  | 2.4665      | 0.83652375 | 0.000789120 |          |            |            |
| PK5H2 | NM_033126.107799_R | ACGTA AAAAGCTCTGCTGGTGTACATATCTCTTGAAATATGTGATCAACCAAGAGGG | HL533044 | 13791 | 2.27115     | 0.3991248  | 0.000605777 |          |            |            |
| PK5H2 | NM_033126.107799_R | ACGTA AAAAGCTCTGCTGGTGTACATATCTCTTGAAATATGTGATCAACCAAGAGGG | HL533044 | 3037  | 2.63466667  | 1.61329274 | 0.01504603  |          |            |            |
| PK5H2 | NM_033126.107799_R | ACGTA AAAAGCTCTGCTGGTGTACATATCTCTTGAAATATGTGATCAACCAAGAGGG | HL533044 | 8425  | 1.79775     | 0.95209596 | 0.00532361  |          |            |            |
| PK5H2 | NM_033126.107799_R | ACGTA AAAAGCTCTGCTGGTGTACATATCTCTTGAAATATGTGATCAACCAAGAGGG | HL533044 | 13795 | 0.49263     | 0.9999678  | 0.002706423 |          |            |            |
| PK5H2 | NM_033126.107799_R | ACGTA AAAAGCTCTGCTGGTGTACATATCTCTTGAAATATGTGATCAACCAAGAGGG | HL533044 | 3045  | 0.11165     | 0.33210338 | 0.036474806 |          |            |            |
| PK5H2 | NM_033126.107799_R | ACGTA AAAAGCTCTGCTGGTGTACATATCTCTTGAAATATGTGATCAACCAAGAGGG | HL533044 | 8427  | 1.017       | 0.3863186  | 0.000935473 |          |            |            |
| PK5H2 | NM_033126.107799_R | ACGTA AAAAGCTCTGCTGGTGTACATATCTCTTGAAATATGTGATCAACCAAGAGGG | HL533044 | 13797 | 1.118625    | 0.14099363 | 0.004095737 |          |            |            |
| PK5H2 | NM_033126.107799_R | ACGTA AAAAGCTCTGCTGGTGTACATATCTCTTGAAATATGTGATCAACCAAGAGGG | HL533044 | 3047  | 3.1667      | 0.610213   | 0.000132133 |          |            |            |
| PK5H2 | NM_033126.107799_R | ACGTA AAAAGCTCTGCTGGTGTACATATCTCTTGAAATATGTGATCAACCAAGAGGG | HL533044 | 8417  | 3.18675     | 1.2654166  | 0.001286716 |          |            |            |
| PK5H2 | NM_033126.107799_R | ACGTA AAAAGCTCTGCTGGTGTACATATCTCTTGAAATATGTGATCAACCAAGAGGG | HL533044 | 13793 | 1.43775     | 1.2033364  | 0.001221041 |          |            |            |
| PK5H2 | NM_033126.107799_R | ACGTA AAAAGCTCTGCTGGTGTACATATCTCTTGAAATATGTGATCAACCAAGAGGG | HL533044 | 3049  | 0.21325     | 0.2498284  | 0.001158128 |          |            |            |
| PK5H2 | NM_033126.107799_R | ACGTA AAAAGCTCTGCTGGTGTACATATCTCTTGAAATATGTGATCAACCAAGAGGG | HL533044 | 8419  | 0.32315     | 0.2652020  | 0.06626326  |          |            |            |
| PK5H2 | NM_033126.107799_R | ACGTA AAAAGCTCTGCTGGTGTACATATCTCTTGAAATATGTGATCAACCAAGAGGG | HL533044 | 13795 | 0.3578      | 0.2464625  | 0.000144185 |          |            |            |
| PK5H2 | NM_033126.107799_R | ACGTA AAAAGCTCTGCTGGTGTACATATCTCTTGAAATATGTGATCAACCAAGAGGG | HL533044 | 3050  | -0.436      | 0.3892293  | 0.05588143  |          |            |            |
| PK5H2 | NM_033126.107799_R | ACGTA AAAAGCTCTGCTGGTGTACATATCTCTTGAAATATGTGATCAACCAAGAGGG | HL533044 | 8429  | 1.344       | 0.9517375  | 0.000179073 |          |            |            |
| PK5H2 | NM_033126.107799_R | ACGTA AAAAGCTCTGCTGGTGTACATATCTCTTGAAATATGTGATCAACCAAGAGGG | HL533044 | 1342  | 0.6358      | 0.32314469 | 0.01396315  |          |            |            |
| PK5H2 | NM_033126.107799_R | ACGTA AAAAGCTCTGCTGGTGTACATATCTCTTGAAATATGTGATCAACCAAGAGGG | HL533044 | 3057  | 2.087       | 0.33482911 | 0.578E-06   |          |            |            |
| PK5H2 | NM_033126.107799_R | ACGTA AAAAGCTCTGCTGGTGTACATATCTCTTGAAATATGTGATCAACCAAGAGGG | HL533044 | 8423  | 2.038       | 0.7775227  | 0.000506219 |          |            |            |
| PK5H2 | NM_033126.107799_R | ACGTA AAAAGCTCTGCTGGTGTACATATCTCTTGAAATATGTGATCAACCAAGAGGG | HL533044 | 13799 | 2.087       | 0.4542301  | 0.00018672  |          |            |            |
| PK5H2 | NM_033126.107799_R | ACGTA AAAAGCTCTGCTGGTGTACATATCTCTTGAAATATGTGATCAACCAAGAGGG | HL533044 | 3059  | 0.2927      | 0.796      | 0.000306821 |          |            |            |
| PK5H2 | NM_033126.107799_R | ACGTA AAAAGCTCTGCTGGTGTACATATCTCTTGAAATATGTGATCAACCAAGAGGG | HL533044 | 8429  | 1.8325      | 0.6469718  | 0.001375752 |          |            |            |
| PK5H2 | NM_033126.107799_R | ACGTA AAAAGCTCTGCTGGTGTACATATCTCTTGAAATATGTGATCAACCAAGAGGG | HL533044 | 1344  | -0.910225   | 0.6109099  | 0.000920447 |          |            |            |
| PK5H2 | NM_033126.107799_R | ACGTA AAAAGCTCTGCTGGTGTACATATCTCTTGAAATATGTGATCAACCAAGAGGG | HL533044 | 3056  | 0.43275     | 0.60625705 | 1.71E-05    |          |            |            |
| PK5H2 | NM_033126.107799_R | ACGTA AAAAGCTCTGCTGGTGTACATATCTCTTGAAATATGTGATCAACCAAGAGGG | HL533044 | 8428  | 0.22745     | 0.1371071  | 0.00013861  |          |            |            |
| PK5H2 | NM_033126.107799_R | ACGTA AAAAGCTCTGCTGGTGTACATATCTCTTGAAATATGTGATCAACCAAGAGGG | HL533044 | 13458 | 0.430075    | 0.3851263  | 5.12E-06    |          |            |            |
| PK5H2 | NM_033126.107799_R | ACGTA AAAAGCTCTGCTGGTGTACATATCTCTTGAAATATGTGATCAACCAAGAGGG | HL533044 | 3058  | 0.32475     | 0.2332643  | 0.00146138  |          |            |            |
| PK5H2 | NM_033126.107799_R | ACGTA AAAAGCTCTGCTGGTGTACATATCTCTTGAAATATGTGATCAACCAAGAGGG | HL533044 | 8428  | 0.420075    | 0.6997006  | 0.01441368  |          |            |            |
| PK5H2 | NM_033126.107799_R | ACGTA AAAAGCTCTGCTGGTGTACATATCTCTTGAAATATGTGATCAACCAAGAGGG | HL533044 | 13460 | 0.464275    | 0.1784622  | 0.01309809  |          |            |            |
| PK5H2 | NM_033126.107799_R | ACGTA AAAAGCTCTGCTGGTGTACATATCTCTTGAAATATGTGATCAACCAAGAGGG | HL533044 | 3058  | 1.127       | 0.2133646  | 0.00013861  |          |            |            |
| PK5H2 | NM_033126.107799_R | ACGTA AAAAGCTCTGCTGGTGTACATATCTCTTGAAATATGTGATCAACCAAGAGGG | HL533044 | 8428  | 0.7067      | 0.2285077  | 0.00382793  |          |            |            |
| PK5H2 | NM_033126.107799_R | ACGTA AAAAGCTCTGCTGGTGTACATATCTCTTGAAATATGTGATCAACCAAGAGGG | HL533044 | 13462 | 1.494       | 0.146213   | 0.00013861  |          |            |            |
| PK5H2 | NM_033126.107799_R | ACGTA AAAAGCTCTGCTGGTGTACATATCTCTTGAAATATGTGATCAACCAAGAGGG | HL533044 | 3058  | 0.164235    | 0.4011033  | 0.014051339 |          |            |            |
| PK5H2 | NM_033126.107799_R | ACGTA AAAAGCTCTGCTGGTGTACATATCTCTTGAAATATGTGATCAACCAAGAGGG | HL533044 | 8428  | 0.188375    | 0.3970765  | 0.002320595 |          |            |            |
| PK5H2 | NM_033126.107799_R | ACGTA AAAAGCTCTGCTGGTGTACATATCTCTTGAAATATGTGATCAACCAAGAGGG | HL533044 | 13450 | 0.21105     | 0.3894384  | 0.425147911 |          |            |            |
| PK5H2 | NM_033126.107799_R | ACGTA AAAAGCTCTGCTGGTGTACATATCTCTTGAAATATGTGATCAACCAAGAGGG | HL533044 | 3058  | 4.778       | 1.9551091  | 0.00150888  |          |            |            |
| PK5H2 | NM_033126.107799_R | ACGTA AAAAGCTCTGCTGGTGTACATATCTCTTGAAATATGTGATCAACCAAGAGGG | HL533044 | 8429  | 4.26935     | 1.7552588  | 0.00119312  |          |            |            |
| PK5H2 | NM_033126.107799_R | ACGTA AAAAGCTCTGCTGGTGTACATATCTCTTGAAATATGTGATCAACCAAGAGGG | HL533044 | 13446 | 4.26935     | 1.8865538  | 0.001024947 |          |            |            |
| PK5H2 | NM_033126.107799_R | ACGTA AAAAGCTCTGCTGGTGTACATATCTCTTGAAATATGTGATCAACCAAGAGGG | HL533044 | 3056  | 0.860025    | 1.8182416  | 0.00006614  |          |            |            |
| PK5H2 | NM_033126.107799_R | ACGTA AAAAGCTCTGCTGGTGTACATATCTCTTGAAATATGTGATCAACCAAGAGGG | HL533044 | 8428  | 0.8072      | 2.83475    | 0.001493338 |          |            |            |
| PK5H2 | NM_033126.10779    |                                                            |          |       |             |            |             |          |            |            |





|        |           |          |                                                    |         |       |             |            |              |            |            |             |             |            |             |
|--------|-----------|----------|----------------------------------------------------|---------|-------|-------------|------------|--------------|------------|------------|-------------|-------------|------------|-------------|
| RAPH1  | NM_013589 | 36527_8  | ACGTAAAGAGACATGGTTCAGGAAAGCTTGGATATCTTGGACATGCTGGG | 471162  | 9076  | -0.371175   | 0.14673131 | 0.13218434   |            | -0.0680375 | 0.32741166  | 0.798819301 |            |             |
| RAPH1  | NM_013589 | 36527_9  | ACGTAAAGAGACATGGTTCAGGAAAGCTTGGATATCTTGGACATGCTGGG | 44452   | 9076  | -0.371175   | 0.14673131 | 0.13218434   |            | -0.0680375 | 0.32741166  | 0.798819301 |            |             |
| RAS2L1 | NM_170692 | 361283_3 | ACGTAAAGAGACCTTATTGGTAAATCTTGGATATCGTGAAGAGAGTCCCG | 1673731 | 2744  | 0.21545     | 0.25275259 | 0.15924295   |            | -0.4846263 | 0.38861098  | 1.346611971 |            |             |
| RAS2L1 | NM_170692 | 361283_4 | ACGTAAAGAGACCTTATTGGTAAATCTTGGATATCGTGAAGAGAGTCCCG | 1673731 | 2744  | 0.21545     | 0.25275259 | 0.15924295   |            | -0.4846263 | 0.38861098  | 1.346611971 |            |             |
| RAS2L1 | NM_170692 | 361283_5 | ACGTAAAGAGACCTTATTGGTAAATCTTGGATATCGTGAAGAGAGTCCCG | 1673731 | 13496 | 0.022995    | 0.23795233 | 0.665194158  |            | 0.3886625  | 0.30579233  | 0.285200601 |            |             |
| RAS2L1 | NM_170692 | 361854_8 | ACGTAAAGAGACCTTATTGGTAAATCTTGGATATCGTGAAGAGAGTCCCG | 1673731 | 2746  | 0.308875    | 0.27799522 | 0.68724081   |            | 0.3808785  | 1.0714284   | 0.346299515 |            |             |
| RAS2L1 | NM_170692 | 361854_9 | ACGTAAAGAGACCTTATTGGTAAATCTTGGATATCGTGAAGAGAGTCCCG | 1673731 | 8122  | 0.1397      | 0.23647959 | 0.066901617  |            | -0.1807293 | 0.0567299   | 0.338749484 |            |             |
| RAS2L1 | NM_170692 | 361854_8 | ACGTAAAGAGACCTTATTGGTAAATCTTGGATATCGTGAAGAGAGTCCCG | 1673731 | 13498 | 0.308875    | 0.2816704  | 0.09136041   |            | 0.3613125  | 0.9752760   | 0.330927172 |            |             |
| RAS2L1 | NM_170692 | 361854_9 | ACGTAAAGAGACCTTATTGGTAAATCTTGGATATCGTGAAGAGAGTCCCG | 1673731 | 2742  | 0.4812626   | 0.3188281  | 0.000313281  |            | -0.4846263 | 0.38861098  | 1.346611971 |            |             |
| RAS2L1 | NM_170692 | 361854_8 | ACGTAAAGAGACCTTATTGGTAAATCTTGGATATCGTGAAGAGAGTCCCG | 1673731 | 8118  | 0.467575    | 0.18844207 | 0.085393495  |            | -1.0579125 | 0.4937922   | 0.80470643  |            |             |
| RAS2L1 | NM_170692 | 361854_9 | ACGTAAAGAGACCTTATTGGTAAATCTTGGATATCGTGAAGAGAGTCCCG | 1673731 | 13494 | 0.4355875   | 0.2707384  | 0.07515462   |            | -1.0444875 | 0.5687799   | 0.00957489  |            |             |
| RASGF1 | NM_020991 | 361248_8 | ACGTAAAGAGACCTTATTGGTAAATCTTGGATATCGTGAAGAGAGTCCCG | 4490035 | 5089  | 1.4441235   | 0.2578028  | 0.00001131   | 0.0646125  | 0.4563079  | 0.78823961  |             |            |             |
| RASGF1 | NM_020991 | 361248_8 | ACGTAAAGAGACCTTATTGGTAAATCTTGGATATCGTGAAGAGAGTCCCG | 4490035 | 10465 | 1.3584875   | 0.2962115  | 0.00029575   | 0.232425   | 0.264187   | 0.232168847 |             |            |             |
| RASGF1 | NM_020991 | 361248_8 | ACGTAAAGAGACCTTATTGGTAAATCTTGGATATCGTGAAGAGAGTCCCG | 4490035 | 1584  | 1.4152926   | 0.11666405 | 0.00029485   | 1.210795   | 0.4752879  | 0.416864942 |             |            |             |
| RASGF1 | NM_020991 | 361856_8 | ACGTAAAGAGACCTTATTGGTAAATCTTGGATATCGTGAAGAGAGTCCCG | 4490035 | 5091  | -0.1414215  | 0.1749495  | 0.363845612  | -0.1521375 | 0.172336   | 0.351177056 |             |            |             |
| RASGF1 | NM_020991 | 361856_8 | ACGTAAAGAGACCTTATTGGTAAATCTTGGATATCGTGAAGAGAGTCCCG | 4490035 | 10467 | -0.1352625  | 0.1751324  | 0.39633148   | -0.2245125 | 0.16440452 | 0.189621885 |             |            |             |
| RASGF1 | NM_020991 | 361856_8 | ACGTAAAGAGACCTTATTGGTAAATCTTGGATATCGTGAAGAGAGTCCCG | 4490035 | 15843 | 0.0307125   | 0.2039120  | 0.8478727    | 0.088125   | 0.2583820  | 0.961960331 |             |            |             |
| RASGF1 | NM_020991 | 361856_8 | ACGTAAAGAGACCTTATTGGTAAATCTTGGATATCGTGAAGAGAGTCCCG | 4490035 | 10467 | 0.4355875   | 0.2707384  | 0.07515462   |            | 0.294275   | 0.2231554   | 0.183808676 |            |             |
| RASGF1 | NM_020991 | 361856_8 | ACGTAAAGAGACCTTATTGGTAAATCTTGGATATCGTGAAGAGAGTCCCG | 4490035 | 15812 | 0.6528785   | 0.4656742  | 0.07288174   |            | 0.14785    | 0.2299931   | 0.484894704 |            |             |
| RASGF1 | NM_020991 | 361856_8 | ACGTAAAGAGACCTTATTGGTAAATCTTGGATATCGTGAAGAGAGTCCCG | 4490035 | 14288 | 0.6318625   | 0.3789314  | 0.00810049   |            | 0.182525   | 0.2527422   | 0.386109124 |            |             |
| RASGF1 | NM_020991 | 361856_8 | ACGTAAAGAGACCTTATTGGTAAATCTTGGATATCGTGAAGAGAGTCCCG | 4490035 | 3538  | 1.7117135   | 0.32259914 | 0.000179939  |            | 0.3266008  | 0.032321467 |             |            |             |
| RASGF1 | NM_020991 | 361856_8 | ACGTAAAGAGACCTTATTGGTAAATCTTGGATATCGTGAAGAGAGTCCCG | 4490035 | 8914  | 1.6907785   | 0.4079898  | 0.00041043   |            | 0.440205   | 0.1357457   | 0.03000064  |            |             |
| RASGF1 | NM_020991 | 361856_8 | ACGTAAAGAGACCTTATTGGTAAATCTTGGATATCGTGAAGAGAGTCCCG | 4490035 | 14288 | 1.5612626   | 0.3188281  | 0.000313281  |            | 0.499775   | 0.1566247   | 0.027332026 |            |             |
| RASGF1 | NM_020991 | 361856_8 | ACGTAAAGAGACCTTATTGGTAAATCTTGGATATCGTGAAGAGAGTCCCG | 4490035 | 15812 | 3538        | -0.4352625 | 0.4966248    | 0.11864541 | 0.1901     | 0.4218928   | 0.376170713 |            |             |
| RASGF1 | NM_020991 | 361856_8 | ACGTAAAGAGACCTTATTGGTAAATCTTGGATATCGTGAAGAGAGTCCCG | 4490035 | 8912  | 0.4355875   | 0.2707384  | 0.07515462   |            | 0.18355    | 0.2271407   | 0.382606055 |            |             |
| RASGF1 | NM_020991 | 361856_8 | ACGTAAAGAGACCTTATTGGTAAATCTTGGATATCGTGAAGAGAGTCCCG | 4490035 | 14288 | -0.4451125  | 0.5405822  | 0.12947676   |            | 0.21745    | 0.2297874   | 0.312299329 |            |             |
| RASGF1 | NM_020991 | 361856_8 | ACGTAAAGAGACCTTATTGGTAAATCTTGGATATCGTGAAGAGAGTCCCG | 4490035 | 4286  | -0.1043075  | 0.2571558  | 0.055949249  | 0.8209     | 0.1680164  | 0.01202267  |             |            |             |
| RASGF1 | NM_020991 | 361856_8 | ACGTAAAGAGACCTTATTGGTAAATCTTGGATATCGTGAAGAGAGTCCCG | 4490035 | 9582  | -0.307225   | 0.6691548  | 0.33898951   | 0.459575   | 0.4285285  | 0.04277886  | 0.012       |            |             |
| RASGF1 | NM_020991 | 361856_8 | ACGTAAAGAGACCTTATTGGTAAATCTTGGATATCGTGAAGAGAGTCCCG | 4490035 | 14958 | 0.521       | 0.7533184  | 0.1627785    | 0.53835    | 0.4509976  | 0.01568316  | 0.708       |            |             |
| RASGF1 | NM_020991 | 361856_8 | ACGTAAAGAGACCTTATTGGTAAATCTTGGATATCGTGAAGAGAGTCCCG | 4490035 | 4204  | 1.528421    | 0.7997565  | 0.00011299   | 1.2294     | 0.9269374  | 0.05688116  | 1.205       |            |             |
| RASGF1 | NM_020991 | 361856_8 | ACGTAAAGAGACCTTATTGGTAAATCTTGGATATCGTGAAGAGAGTCCCG | 4490035 | 9580  | 1.50455     | 1.1284181  | 0.03610227   | 1.0779615  | 0.04666335 | 0.33033133  | 0.02801011  | 0.44410973 |             |
| RASGF1 | NM_020991 | 361856_8 | ACGTAAAGAGACCTTATTGGTAAATCTTGGATATCGTGAAGAGAGTCCCG | 4490035 | 14956 | 1.4256      | 1.1793941  | 0.02794514   | 1.350823   | 0.34846664 | 0.11992611  | 0.521424051 |            |             |
| RASGF1 | NM_020991 | 361856_8 | ACGTAAAGAGACCTTATTGGTAAATCTTGGATATCGTGAAGAGAGTCCCG | 4490035 | 4202  | -0.26995    | 0.3307710  | 0.30631588   | -0.167775  | 0.1787255  | 0.31447823  | 0.5372911   | 0.64466474 |             |
| RASGF1 | NM_020991 | 361856_8 | ACGTAAAGAGACCTTATTGGTAAATCTTGGATATCGTGAAGAGAGTCCCG | 4490035 | 9578  | 0.4737      | 0.2190737  | 0.0270812    | -0.28075   | 0.4906793  | 0.2171111   | 0.10356661  | 0.1080908  | 0.8303148   |
| RASGF1 | NM_020991 | 361856_8 | ACGTAAAGAGACCTTATTGGTAAATCTTGGATATCGTGAAGAGAGTCCCG | 4490035 | 14954 | -0.2542     | 0.14919811 | 0.13963817   | -0.12365   | 0.3724477  | 0.51887703  | -0.2350333  | 0.4037096  | 0.423820412 |
| RASGF1 | NM_020991 | 361856_8 | ACGTAAAGAGACCTTATTGGTAAATCTTGGATATCGTGAAGAGAGTCCCG | 4490035 | 17732 | 0.3042975   | 0.2808288  | -0.1177125   | 0.8608264  |            |             |             |            |             |
| RASGF1 | NM_020991 | 361856_8 | ACGTAAAGAGACCTTATTGGTAAATCTTGGATATCGTGAAGAGAGTCCCG | 4490035 | 10719 | -0.4554125  | 0.2801291  | 0.04265048   | -0.879085  | 0.5137238  | 0.001195059 |             |            |             |
| RASGF1 | NM_020991 | 361856_8 | ACGTAAAGAGACCTTATTGGTAAATCTTGGATATCGTGAAGAGAGTCCCG | 4490035 | 16095 | 0.2918975   | 1.3376254  | 0.05159646   | -1.7978    | 1.0360130  | 0.07026205  |             |            |             |
| RASGF1 | NM_020991 | 361856_8 | ACGTAAAGAGACCTTATTGGTAAATCTTGGATATCGTGAAGAGAGTCCCG | 4490035 | 534   | 0.9181129   | 0.2386741  | 0.1321321    | 0.171      | 0.0800764  |             |             |            |             |
| RASGF1 | NM_020991 | 361856_8 | ACGTAAAGAGACCTTATTGGTAAATCTTGGATATCGTGAAGAGAGTCCCG | 4490035 | 10717 | -1.2204735  | 0.2014945  | 0.00063616   | -1.273875  | 0.8012162  | 0.01885434  |             |            |             |
| RASGF1 | NM_020991 | 361856_8 | ACGTAAAGAGACCTTATTGGTAAATCTTGGATATCGTGAAGAGAGTCCCG | 4490035 | 16093 | 10719       | 0.9325735  | 0.3887280    | 0.05527492 | -1.2707625 | 0.6912125   | 0.01172445  |            |             |
| RASGF1 | NM_020991 | 361856_8 | ACGTAAAGAGACCTTATTGGTAAATCTTGGATATCGTGAAGAGAGTCCCG | 4490035 | 16097 | 17125       | 0.6028715  | 0.00000000   |            |            |             |             |            |             |
| RASGF1 | NM_020991 | 361856_8 | ACGTAAAGAGACCTTATTGGTAAATCTTGGATATCGTGAAGAGAGTCCCG | 4490035 | 2303  | 0.6006265   | 0.3298962  | 0.001144908  |            | 1.2682375  | 1.20471281  | 0.03236468  |            |             |
| RASGF1 | NM_020991 | 361856_8 | ACGTAAAGAGACCTTATTGGTAAATCTTGGATATCGTGAAGAGAGTCCCG | 4490035 | 7819  | -0.895125   | 0.2314149  | 0.02389915   |            | 1.238975   | 1.2397494   | 0.04710895  |            |             |
| RASGF1 | NM_020991 | 361856_8 | ACGTAAAGAGACCTTATTGGTAAATCTTGGATATCGTGAAGAGAGTCCCG | 4490035 | 13055 | 0.659125    | 0.4271504  | 0.000111749  |            | 0.4526294  | 0.2678416   | 0.027681616 |            |             |
| RASGF1 | NM_020991 | 361856_8 | ACGTAAAGAGACCTTATTGGTAAATCTTGGATATCGTGAAGAGAGTCCCG | 4490035 | 2301  | -1.1862375  | 0.1448474  | 0.00002830   |            | -0.5338875 | 0.3067389   | 0.04288774  |            |             |
| RASGF1 | NM_020991 | 361856_8 | ACGTAAAGAGACCTTATTGGTAAATCTTGGATATCGTGAAGAGAGTCCCG | 4490035 | 7917  | 0.1713875   | 0.18880806 | 0.000064652  |            | -0.4903875 | 0.2961933   | 0.05948668  |            |             |
| RASGF1 | NM_020991 | 361856_8 | ACGTAAAGAGACCTTATTGGTAAATCTTGGATATCGTGAAGAGAGTCCCG | 4490035 | 13053 | -1.18512625 | 0.17484049 | 0.00049379   |            | 0.5152625  | 0.2931049   | 0.046897723 |            |             |
| RASGF1 | NM_020991 | 361856_8 | ACGTAAAGAGACCTTATTGGTAAATCTTGGATATCGTGAAGAGAGTCCCG | 4490035 | 1000  | 0.6694265   | 0.3284875  | 0.00000000   |            | 0.4903875  | 0.2961933   | 0.05948668  |            |             |
| RASGF1 | NM_020991 | 361856_8 | ACGTAAAGAGACCTTATTGGTAAATCTTGGATATCGTGAAGAGAGTCCCG | 4490035 | 48828 | 6376        | -0.6507875 | 0.3294553    | 0.01567807 |            | -0.5402375  | 0.10927459  | 0.02738806 |             |
| RASGF1 | NM_020991 | 361856_8 | ACGTAAAGAGACCTTATTGGTAAATCTTGGATATCGTGAAGAGAGTCCCG | 4490035 | 11728 | 3868        | 0.828225   | 0.2808288    | 0.00000000 |            | 0.5051613   | 0.2216137   |            |             |
| RASGF1 | NM_020991 | 361856_8 | ACGTAAAGAGACCTTATTGGTAAATCTTGGATATCGTGAAGAGAGTCCCG | 4490035 | 7482  | 3587        | 0.058225   | 0.7839287    | 0.86667783 |            | -0.401125   | 0.9170185   | 0.1537776  |             |
| RASGF1 | NM_020991 | 361856_8 | ACGTAAAGAGACCTTATTGGTAAATCTTGGATATCGTGAAGAGAGTCCCG | 4490035 | 7482  | 3589        | 0.809425   | 0.2884749    | 0.00528088 |            | 0.4542625   | 0.13992971  | 0.02788818 |             |
| RASGF1 | NM_020991 | 361856_8 | ACGTAAAGAGACCTTATTGGTAAATCTTGGATATCGTGAAGAGAGTCCCG | 4490035 | 8965  | 0.804525    | 0.4052875  | 0.00007927   |            | 0.4542625  | 0.13992971  | 0.02788818  |            |             |
| RASGF1 | NM_020991 | 361856_8 | ACGTAAAGAGACCTTATTGGTAAATCTTGGATATCGTGAAGAGAGTCCCG | 4490035 | 7482  | 1431        | 0.131075   | 0.3081504    | 0.00218452 |            | 0.4606125   | 0.4394294   | 0.09491712 |             |
| RASGF1 | NM_020991 | 361856_8 | ACGTAAAGAGACCTTATTGGTAAATCTTGGATATCGTGAAGAGAGTCCCG | 4490035 | 3885  | 48828       | 0.4311     | 0.40985      | 0.00000000 |            | 0.4311      | 0.40985     | 0.00000000 |             |
| RASGF1 | NM_020991 | 361856_8 | ACGTAAAGAGACCTTATTGGTAAATCTTGGATATCGTGAAGAGAGTCCCG | 4490035 | 7482  | 14317       | -0.18245   | 0.4006237    | 0.40728035 |            | 0.6344461   | 0.9589129   | 0.06114465 |             |
| RASGF1 | NM_020991 | 361856_8 | ACGTAAAGAGACCTTATTGGTAAATCTTGGATATCGTGAAGAGAGTCCCG | 4490035 | 9841  | 0.13095     | 0.131075   | 0.00000000   |            | 0.3982333  | 0.3715232   | 0.0414322   |            |             |
| RASGF1 | NM_020991 | 361856_8 | ACGTAAAGAGACCTTATTGGTAAATCTTGGATATCGTGAAGAGAGTCCCG | 4490035 | 3884  | 1.1206265   | 0.1538113  | 0.00003227   |            | 0.460625   | 0.1150231   | 0.03372758  |            |             |
| RASGF1 | NM_020991 | 361856_8 | ACGTAAAGAGACCTTATTGGTAAATCTTGGATATCGTGAAGAGAGTCCCG | 4490035 | 9270  | 1.175245    | 0.1794023  | 0.00051467   |            | 0.45442    | 0.1048312   | 0.04778818  |            |             |
| RASGF1 | NM_020991 | 361856_8 | ACGTAAAGAGACCTTATTGGTAAATCTTGGATATCGTGAAGAGAGTCCCG | 4490035 | 1464  | 1.20612625  | 0.1821728  | 0.0001381152 |            | 0.4542625  | 0.13992971  | 0.02788818  |            |             |
| RASGF1 | NM_020991 | 361856_8 | ACGTAAAGAGACCTTATTGGTAAATCTTGGATATCGTGAAGAGAGTCCCG | 4490035 | 3896  | -0.5338735  | 0.5388011  | 0.08912579   |            | 0.21615    | 0.2215379   |             |            |             |





|       |                    |                                                         |          |       |            |             |             |              |            |             |
|-------|--------------------|---------------------------------------------------------|----------|-------|------------|-------------|-------------|--------------|------------|-------------|
| RPK2  | LN_003821_361438.R | ACCTAAAGAGGAGGATCTTGATCGTAATCTCTTGAATGATGATGAGGATGCTGGG | HL103755 | 5586  | -0.77905   | 0.13054158  | 0.100646311 | -0.1636625   | 0.22593264 | 0.356058402 |
| RPK2  | LN_003821_361438.R | ACCTAAAGAGGAGGATCTTGATCGTAATCTCTTGAATGATGATGAGGATGCTGGG | HL103755 | 1086  | -0.20055   | 0.13054158  | 0.100646311 | -0.1636625   | 0.22593264 | 0.356058402 |
| RPK2  | LN_003821_361438.R | ACCTAAAGAGGAGGATCTTGATCGTAATCTCTTGAATGATGATGAGGATGCTGGG | HL103755 | 211   | -0.0616    | 0.20289138  | 0.081166696 | 0.1382123    | 0.3265157  | 0.499339588 |
| RPK2  | LN_003821_361438.R | ACCTAAAGAGGAGGATCTTGATCGTAATCTCTTGAATGATGATGAGGATGCTGGG | HL103755 | 363   | -0.06354   | 0.156116013 | 0.131790755 | -0.1813733   | 0.2159464  | 0.317872807 |
| RPK3  | LN_006871_361481.R | ACCTAAAGAGGAGGATCTTGATCGTAATCTCTTGAATGATGATGAGGATGCTGGG | HL288551 | 5931  | -0.4502    | 0.75327238  | 0.216700035 | -0.0829528   | 0.2895284  | 0.200676673 |
| RPK3  | LN_006871_361481.R | ACCTAAAGAGGAGGATCTTGATCGTAATCTCTTGAATGATGATGAGGATGCTGGG | HL288551 | 11307 | -0.72049   | 0.110466666 | 0.028088667 | -0.3701      | 0.14740063 | 0.082536109 |
| RPK3  | LN_006871_361481.R | ACCTAAAGAGGAGGATCTTGATCGTAATCTCTTGAATGATGATGAGGATGCTGGG | HL288551 | 555   |            |             |             |              |            |             |
| RPK3  | LN_006871_361481.R | ACCTAAAGAGGAGGATCTTGATCGTAATCTCTTGAATGATGATGAGGATGCTGGG | HL288551 | 556   | -0.22545   | 0.10574872  | 0.141651034 | 2.5574       |            |             |
| RPK3  | LN_006871_361481.R | ACCTAAAGAGGAGGATCTTGATCGTAATCTCTTGAATGATGATGAGGATGCTGGG | HL288551 | 5932  | -0.17735   | 0.29642409  | 0.20564253  | -0.306666647 | 0.44190755 | 0.886424974 |
| RPK3  | LN_006871_361481.R | ACCTAAAGAGGAGGATCTTGATCGTAATCTCTTGAATGATGATGAGGATGCTGGG | HL288551 | 11338 | -0.12412   | 0.13220666  | 0.028088667 | -0.16225     | 0.23293664 | 0.357018614 |
| RPK3  | LN_006871_361481.R | ACCTAAAGAGGAGGATCTTGATCGTAATCTCTTGAATGATGATGAGGATGCTGGG | HL288551 | 1905  | -1.93625   | 1.12621291  | 0.014811726 | -1.7099      | 0.37881571 | 0.47304037  |
| RPK3  | LN_006871_361481.R | ACCTAAAGAGGAGGATCTTGATCGTAATCTCTTGAATGATGATGAGGATGCTGGG | HL288551 | 7281  | -0.21425   | 1.41803002  | 0.02512983  | -1.58833     | 0.1918622  | 0.394830054 |
| RPK3  | LN_006871_361481.R | ACCTAAAGAGGAGGATCTTGATCGTAATCTCTTGAATGATGATGAGGATGCTGGG | HL288551 | 12607 | -2.22005   | 1.64989161  | 0.01810079  | -1.8813133   | 1.79338064 | 0.46119027  |
| RPK4  | LN_020639_360279.R | ACCTAAAGAGGAGGATCTTGATCGTAATCTCTTGAATGATGATGAGGATGCTGGG | HL517120 | 6027  | -0.164075  | 0.0968336   | 0.277184672 | -0.1345      | 0.2009054  | 0.2674667   |
| RPK4  | LN_020639_360279.R | ACCTAAAGAGGAGGATCTTGATCGTAATCTCTTGAATGATGATGAGGATGCTGGG | HL517120 | 11403 | -0.13275   | 0.12001933  | 0.37619696  | -0.1071      | 0.14740063 | 0.082536109 |
| RPK4  | LN_020639_360279.R | ACCTAAAGAGGAGGATCTTGATCGTAATCTCTTGAATGATGATGAGGATGCTGGG | HL517120 | 651   | -0.078225  | 0.1009480   | 0.587590346 | -0.3435      | 0.2895954  | 0.066377116 |
| RPK4  | LN_020639_360279.R | ACCTAAAGAGGAGGATCTTGATCGTAATCTCTTGAATGATGATGAGGATGCTGGG | HL517120 | 608   | -0.89275   | 0.1437181   | 0.00472191  | -0.77373     | 0.33528309 | 0.031139137 |
| RPK4  | LN_020639_360279.R | ACCTAAAGAGGAGGATCTTGATCGTAATCTCTTGAATGATGATGAGGATGCTGGG | HL517120 | 1484  | -0.977375  | 0.5032207   | 0.00851825  | -0.88025     | 0.3177489  | 0.00668783  |
| RPK4  | LN_020639_360279.R | ACCTAAAGAGGAGGATCTTGATCGTAATCTCTTGAATGATGATGAGGATGCTGGG | HL517120 | 653   | -0.0511333 | 0.13952831  | 0.816104003 | -0.80975     | 0.2407172  | 0.04485218  |
| RPK4  | LN_020639_360279.R | ACCTAAAGAGGAGGATCTTGATCGTAATCTCTTGAATGATGATGAGGATGCTGGG | HL517120 | 6029  | 0.05063133 | 0.8999421   | 0.15030391  | -0.8525      | 0.4004829  | 0.02585866  |
| RPK5  | LN_015375_361127.R | ACCTAAAGAGGAGGATCTTGATCGTAATCTCTTGAATGATGATGAGGATGCTGGG | HL6874   | 1405  | 0.2002     | 1.37981471  | 0.65689831  | -0.18025     | 0.4483923  | 0.091501691 |
| RPK5  | LN_015375_361127.R | ACCTAAAGAGGAGGATCTTGATCGTAATCTCTTGAATGATGATGAGGATGCTGGG | HL6874   | 7050  |            |             |             | -0.0413      | 0.2810894  | 0.091951633 |
| RPK5  | LN_015375_361127.R | ACCTAAAGAGGAGGATCTTGATCGTAATCTCTTGAATGATGATGAGGATGCTGGG | HL6874   | 7052  | 0.1357     | 0.1471249   | 0.48667372  |              |            |             |
| RPK5  | LN_015375_361127.R | ACCTAAAGAGGAGGATCTTGATCGTAATCTCTTGAATGATGATGAGGATGCTGGG | HL6874   | 12428 | 0.2501     | 1.24168872  | 0.63291495  | 1.00445      | 0.0268179  | 0.030871586 |
| RPK5  | LN_015375_361127.R | ACCTAAAGAGGAGGATCTTGATCGTAATCTCTTGAATGATGATGAGGATGCTGGG | HL6874   | 1678  | -0.4031    |             |             |              |            |             |
| RPK5  | LN_015375_361127.R | ACCTAAAGAGGAGGATCTTGATCGTAATCTCTTGAATGATGATGAGGATGCTGGG | HL6874   | 526   | 1.81395667 | 5.78925556  | 0.484178184 | 4.6337       | 5.5725364  | 1.89376474  |
| RPK5  | LN_015375_361127.R | ACCTAAAGAGGAGGATCTTGATCGTAATCTCTTGAATGATGATGAGGATGCTGGG | HL6874   | 5902  | 0.23313333 | 7.67015889  | 0.455358966 | 8.5018       |            |             |
| RPK5  | LN_015375_361127.R | ACCTAAAGAGGAGGATCTTGATCGTAATCTCTTGAATGATGATGAGGATGCTGGG | HL6874   | 11278 | 1.124975   | 7.76824949  | 0.47679663  | 3.81129      | 4.68097618 | 1.818496708 |
| RKH01 | AB107331_361481.R  | ACCTAAAGAGGAGGATCTTGATCGTAATCTCTTGAATGATGATGAGGATGCTGGG | HL436495 | 3819  | -0.229205  | 0.22184820  | 0.19932167  |              |            |             |
| RKH01 | AB107331_361481.R  | ACCTAAAGAGGAGGATCTTGATCGTAATCTCTTGAATGATGATGAGGATGCTGGG | HL436495 | 9195  | -0.38185   | 0.30350596  | 0.16651189  |              |            |             |
| RKH01 | AB107331_361481.R  | ACCTAAAGAGGAGGATCTTGATCGTAATCTCTTGAATGATGATGAGGATGCTGGG | HL436495 | 14571 | -0.25025   | 0.24175135  | 0.17723593  |              |            |             |
| RKH01 | AB107331_361481.R  | ACCTAAAGAGGAGGATCTTGATCGTAATCTCTTGAATGATGATGAGGATGCTGGG | HL436495 | 3823  | -1.1183975 | 0.2607884   | 0.028088667 |              |            |             |
| RKH01 | AB107331_361481.R  | ACCTAAAGAGGAGGATCTTGATCGTAATCTCTTGAATGATGATGAGGATGCTGGG | HL436495 | 9197  | -0.4024    | 0.24218866  | 0.0214183   |              |            |             |
| RKH01 | AB107331_361481.R  | ACCTAAAGAGGAGGATCTTGATCGTAATCTCTTGAATGATGATGAGGATGCTGGG | HL436495 | 14573 | -0.77145   | 0.278147    | 0.05066103  |              |            |             |
| RKH01 | AB107331_361481.R  | ACCTAAAGAGGAGGATCTTGATCGTAATCTCTTGAATGATGATGAGGATGCTGGG | HL436495 | 3817  | -0.00202   | 0.2453751   | 0.0408131   |              |            |             |
| RKH01 | AB107331_361481.R  | ACCTAAAGAGGAGGATCTTGATCGTAATCTCTTGAATGATGATGAGGATGCTGGG | HL436495 | 9193  | -0.59075   | 0.7280056   | 0.1514993   |              |            |             |
| RKH01 | AB107331_361481.R  | ACCTAAAGAGGAGGATCTTGATCGTAATCTCTTGAATGATGATGAGGATGCTGGG | HL436495 | 14569 | -0.3275    | 0.2858077   | 0.272727604 |              |            |             |
| RKH02 | ALB33319_361353.R  | ACCTAAAGAGGAGGATCTTGATCGTAATCTCTTGAATGATGATGAGGATGCTGGG | HL465144 | 4158  | 0.02025    | 0.52549602  | 0.935388301 | -0.757       | 0.5922458  | 0.04499991  |
| RKH02 | ALB33319_361353.R  | ACCTAAAGAGGAGGATCTTGATCGTAATCTCTTGAATGATGATGAGGATGCTGGG | HL465144 | 9514  | -0.6409    | 0.1928125   | 0.028088667 |              |            |             |
| RKH02 | ALB33319_361353.R  | ACCTAAAGAGGAGGATCTTGATCGTAATCTCTTGAATGATGATGAGGATGCTGGG | HL465144 | 14910 | -0.2065    | 0.6600857   | 0.42065222  | -0.4695      | 0.06611448 | 0.21544061  |
| RKH02 | ALB33319_361353.R  | ACCTAAAGAGGAGGATCTTGATCGTAATCTCTTGAATGATGATGAGGATGCTGGG | HL465144 | 4158  | 0.02025    | 0.52549602  | 0.935388301 | -0.757       | 0.5922458  | 0.04499991  |
| RKH02 | ALB33319_361353.R  | ACCTAAAGAGGAGGATCTTGATCGTAATCTCTTGAATGATGATGAGGATGCTGGG | HL465144 | 9514  | -0.6409    | 0.1928125   | 0.028088667 |              |            |             |
| RKH02 | ALB33319_361353.R  | ACCTAAAGAGGAGGATCTTGATCGTAATCTCTTGAATGATGATGAGGATGCTGGG | HL465144 | 14910 | -0.2065    | 0.6600857   | 0.42065222  | -0.4695      | 0.06611448 | 0.21544061  |
| RKH02 | ALB33319_361353.R  | ACCTAAAGAGGAGGATCTTGATCGTAATCTCTTGAATGATGATGAGGATGCTGGG | HL465144 | 4158  | 0.02025    | 0.52549602  | 0.935388301 | -0.757       | 0.5922458  | 0.04499991  |
| RKH02 | ALB33319_361353.R  | ACCTAAAGAGGAGGATCTTGATCGTAATCTCTTGAATGATGATGAGGATGCTGGG | HL465144 | 9514  | -0.6409    | 0.1928125   | 0.028088667 |              |            |             |
| RKH02 | ALB33319_361353.R  | ACCTAAAGAGGAGGATCTTGATCGTAATCTCTTGAATGATGATGAGGATGCTGGG | HL465144 | 14910 | -0.2065    | 0.6600857   | 0.42065222  | -0.4695      | 0.06611448 | 0.21544061  |
| RKH02 | ALB33319_361353.R  | ACCTAAAGAGGAGGATCTTGATCGTAATCTCTTGAATGATGATGAGGATGCTGGG | HL465144 | 4158  | 0.02025    | 0.52549602  | 0.935388301 | -0.757       | 0.5922458  | 0.04499991  |
| RKH02 | ALB33319_361353.R  | ACCTAAAGAGGAGGATCTTGATCGTAATCTCTTGAATGATGATGAGGATGCTGGG | HL465144 | 9514  | -0.6409    | 0.1928125   | 0.028088667 |              |            |             |
| RKH02 | ALB33319_361353.R  | ACCTAAAGAGGAGGATCTTGATCGTAATCTCTTGAATGATGATGAGGATGCTGGG | HL465144 | 14910 | -0.2065    | 0.6600857   | 0.42065222  | -0.4695      | 0.06611448 | 0.21544061  |
| RKH02 | ALB33319_361353.R  | ACCTAAAGAGGAGGATCTTGATCGTAATCTCTTGAATGATGATGAGGATGCTGGG | HL465144 | 4158  | 0.02025    | 0.52549602  | 0.935388301 | -0.757       | 0.5922458  | 0.04499991  |
| RKH02 | ALB33319_361353.R  | ACCTAAAGAGGAGGATCTTGATCGTAATCTCTTGAATGATGATGAGGATGCTGGG | HL465144 | 9514  | -0.6409    | 0.1928125   | 0.028088667 |              |            |             |
| RKH02 | ALB33319_361353.R  | ACCTAAAGAGGAGGATCTTGATCGTAATCTCTTGAATGATGATGAGGATGCTGGG | HL465144 | 14910 | -0.2065    | 0.6600857   | 0.42065222  | -0.4695      | 0.06611448 | 0.21544061  |
| RKH02 | ALB33319_361353.R  | ACCTAAAGAGGAGGATCTTGATCGTAATCTCTTGAATGATGATGAGGATGCTGGG | HL465144 | 4158  | 0.02025    | 0.52549602  | 0.935388301 | -0.757       | 0.5922458  | 0.04499991  |
| RKH02 | ALB33319_361353.R  | ACCTAAAGAGGAGGATCTTGATCGTAATCTCTTGAATGATGATGAGGATGCTGGG | HL465144 | 9514  | -0.6409    | 0.1928125   | 0.028088667 |              |            |             |
| RKH02 | ALB33319_361353.R  | ACCTAAAGAGGAGGATCTTGATCGTAATCTCTTGAATGATGATGAGGATGCTGGG | HL465144 | 14910 | -0.2065    | 0.6600857   | 0.42065222  | -0.4695      | 0.06611448 | 0.21544061  |
| RKH02 | ALB33319_361353.R  | ACCTAAAGAGGAGGATCTTGATCGTAATCTCTTGAATGATGATGAGGATGCTGGG | HL465144 | 4158  | 0.02025    | 0.52549602  | 0.935388301 | -0.757       | 0.5922458  | 0.04499991  |
| RKH02 | ALB33319_361353.R  | ACCTAAAGAGGAGGATCTTGATCGTAATCTCTTGAATGATGATGAGGATGCTGGG | HL465144 | 9514  | -0.6409    | 0.1928125   | 0.028088667 |              |            |             |
| RKH02 | ALB33319_361353.R  | ACCTAAAGAGGAGGATCTTGATCGTAATCTCTTGAATGATGATGAGGATGCTGGG | HL465144 | 14910 | -0.2065    | 0.6600857   | 0.42065222  | -0.4695      | 0.06611448 | 0.21544061  |
| RKH02 | ALB33319_361353.R  | ACCTAAAGAGGAGGATCTTGATCGTAATCTCTTGAATGATGATGAGGATGCTGGG | HL465144 | 4158  | 0.02025    | 0.52549602  | 0.935388301 | -0.757       | 0.5922458  | 0.04499991  |
| RKH02 | ALB33319_361353.R  | ACCTAAAGAGGAGGATCTTGATCGTAATCTCTTGAATGATGATGAGGATGCTGGG | HL465144 | 9514  | -0.6409    | 0.1928125   | 0.028088667 |              |            |             |
| RKH02 | ALB33319_361353.R  | ACCTAAAGAGGAGGATCTTGATCGTAATCTCTTGAATGATGATGAGGATGCTGGG | HL465144 | 14910 | -0.2065    | 0.6600857   | 0.42065222  | -0.4695      | 0.06611448 | 0.21544061  |
| RKH02 | ALB33319_361353.R  | ACCTAAAGAGGAGGATCTTGATCGTAATCTCTTGAATGATGATGAGGATGCTGGG | HL465144 | 4158  | 0.02025    | 0.52549602  | 0.935388301 | -0.757       | 0.5922458  | 0.04499991  |
| RKH02 | ALB33319_361353.R  | ACCTAAAGAGGAGGATCTTGATCGTAATCTCTTGAATGATGATGAGGATGCTGGG | HL465144 | 9514  | -0.6409    | 0.1928125   | 0.028088667 |              |            |             |
| RKH02 | ALB33319_361353.R  | ACCTAAAGAGGAGGATCTTGATCGTAATCTCTTGAATGATGATGAGGATGCTGGG | HL465144 | 14910 | -0.2065    | 0.6600857   | 0.42065222  | -0.4695      | 0.06611448 | 0.21544061  |
| RKH02 | ALB33319_361353.R  | ACCTAAAGAGGAGGATCTTGATCGTAATCTCTTGAATGATGATGAGGATGCTGGG | HL465144 | 4158  | 0.02025    | 0.52549602  | 0.935388301 | -0.757       | 0.5922458  | 0.04499991  |
| RKH02 | ALB33319_361353.R  | ACCTAAAGAGGAGGATCTTGATCGTAATCTCTTGAATGATGATGAGGATGCTGGG | HL465144 | 9514  | -0.6409    | 0.1928125   | 0.028088667 |              |            |             |
| RKH02 | ALB33319_361353.R  | ACCTAAAGAGGAGGATCTTGATCGTAATCTCTTGAATGATGATGAGGATGCTGGG | HL465144 | 14910 | -0.2065    | 0.6600857   | 0.42065222  | -0.4695      | 0.06611448 | 0.21544061  |
| RKH02 | ALB33319_361353.R  | ACCTAAAGAGGAGGATCTTGATCGTAATCTCTTGAATGATGATGAGGATGCTGGG | HL465144 | 4158  | 0.02025    | 0.52549602  | 0.935388301 | -0.757       | 0.5922458  | 0.04499991  |
| RKH02 | ALB33319_361353.R  | ACCTAAAGAGGAGGATCTTGATCGTAATCTCTTGAATGATGATGAGGATGCTGGG | HL465144 | 9514  | -0.6409    | 0.1928125   | 0.028088667 |              |            |             |
| RKH02 | ALB33319_361353.R  | ACCTAAAGAGGAGGATCTTGATCGTAATCTCTTGAATGATGATGAGGATGCTGGG | HL465144 | 14910 | -0.2065    | 0.6600857   | 0.42065222  | -0.4695      | 0.06611448 | 0.21544061  |
| RKH02 | ALB33319_3         |                                                         |          |       |            |             |             |              |            |             |



|        |                    |                                                         |          |       |             |             |             |             |            |             |
|--------|--------------------|---------------------------------------------------------|----------|-------|-------------|-------------|-------------|-------------|------------|-------------|
| RFS6K2 | NM_021135_b0221_R  | ACCTAAAGAAAGAGTCCTGAGAGAGATATCTTGAATATCTCTCCAGCACCTCCGG | HL147119 | 674   | -0.1295     | 0.07412631  | 0.48573337  | 0.221363333 | 0.63753194 | 0.53477966  |
| RFS6K2 | NM_021135_b0221_R  | ACCTAAAGAAAGAGTCCTGAGAGAGATATCTTGAATATCTCTCCAGCACCTCCGG | HL147119 | 675   | 0.2026      | 0.12019788  | 0.47242946  | 0.7126      | 0.25420262 | 0.01739922  |
| RFS6K2 | NM_021135_b0221_R  | ACCTAAAGAAAGAGTCCTGAGAGAGATATCTTGAATATCTCTCCAGCACCTCCGG | HL147119 | 1426  | 0.1262      | 0.13681418  | 0.51724697  | 0.4131      | 0.35967574 | 0.02786866  |
| RFS6K2 | NM_044886_b01345_R | ACCTAAAGAAAGAGTCCTGAGAGAGATATCTTGAATATCTCTCCAGCACCTCCGG | HL147119 | 1427  | -0.174637   | 0.12542147  | 0.51826697  | 0.4131      | 0.35967574 | 0.02786866  |
| RFS6K3 | NM_044886_b01345_R | ACCTAAAGAAAGAGTCCTGAGAGAGATATCTTGAATATCTCTCCAGCACCTCCGG | HL46387  | 1107  | 0.2991      | 0.20281821  | 0.72336862  | 1.79333333  | 1.7272621  | 0.02327667  |
| RFS6K3 | NM_044886_b01345_R | ACCTAAAGAAAGAGTCCTGAGAGAGATATCTTGAATATCTCTCCAGCACCTCCGG | HL46387  | 305   | 0.848375    | 0.23561871  | 0.10148126  | 0.09155     | 3.39662174 | 0.95969039  |
| RFS6K3 | NM_044886_b01345_R | ACCTAAAGAAAGAGTCCTGAGAGAGATATCTTGAATATCTCTCCAGCACCTCCGG | HL46387  | 384   | 0.2991      | 0.20281821  | 0.72336862  | 1.79333333  | 1.7272621  | 0.02327667  |
| RFS6K3 | NM_044886_b01345_R | ACCTAAAGAAAGAGTCCTGAGAGAGATATCTTGAATATCTCTCCAGCACCTCCGG | HL46387  | 724   | 1.76975     | 0.27384948  | 0.11489516  | -0.04793333 | 0.43407574 | 0.09158961  |
| RFS6K3 | NM_044886_b01345_R | ACCTAAAGAAAGAGTCCTGAGAGAGATATCTTGAATATCTCTCCAGCACCTCCGG | HL46387  | 1260  | 0.7055      | 0.14076001  | 0.88971919  | 0.1181125   | 0.11039161 | 0.05843366  |
| RFS6K4 | NM_003942_b01512_R | ACCTAAAGAAAGAGTCCTGAGAGAGATATCTTGAATATCTCTCCAGCACCTCCGG | HL105884 | 216   | -0.27445    | 0.404918971 | 0.23390432  | -0.5117875  | 0.297824   | 0.03800761  |
| RFS6K4 | NM_003942_b01512_R | ACCTAAAGAAAGAGTCCTGAGAGAGATATCTTGAATATCTCTCCAGCACCTCCGG | HL105884 | 225   | 0.2225      | 0.14076001  | 0.88971919  | 0.1181125   | 0.11039161 | 0.05843366  |
| RFS6K4 | NM_003942_b01512_R | ACCTAAAGAAAGAGTCCTGAGAGAGATATCTTGAATATCTCTCCAGCACCTCCGG | HL105884 | 10968 | -0.284175   | 0.34115102  | 0.1844125   | -0.390625   | 0.2812387  | 0.07904429  |
| RFS6K4 | NM_003942_b01512_R | ACCTAAAGAAAGAGTCCTGAGAGAGATATCTTGAATATCTCTCCAGCACCTCCGG | HL105884 | 229   | -0.096175   | 0.08906111  | 0.49622283  | 0.085375    | 0.00909104 | 0.3551138   |
| RFS6K4 | NM_003942_b01512_R | ACCTAAAGAAAGAGTCCTGAGAGAGATATCTTGAATATCTCTCCAGCACCTCCGG | HL105884 | 5605  | 0.020775    | 0.12248158  | 0.88971919  | 0.1181125   | 0.11039161 | 0.05843366  |
| RFS6K4 | NM_003942_b01512_R | ACCTAAAGAAAGAGTCCTGAGAGAGATATCTTGAATATCTCTCCAGCACCTCCGG | HL105884 | 10981 | 0.118252    | 0.22120596  | 0.47920226  | 0.067693    | 0.15875104 | 0.05891109  |
| RFS6K4 | NM_003942_b01512_R | ACCTAAAGAAAGAGTCCTGAGAGAGATATCTTGAATATCTCTCCAGCACCTCCGG | HL105884 | 1662  | -0.2818     | 0.14076001  | 0.88971919  | 0.1181125   | 0.11039161 | 0.05843366  |
| RFS6K4 | NM_003942_b01512_R | ACCTAAAGAAAGAGTCCTGAGAGAGATATCTTGAATATCTCTCCAGCACCTCCGG | HL105884 | 7058  | -0.27223333 | 0.13850624  | 0.719115501 | -0.267625   | 0.14310709 | 0.02894337  |
| RFS6K4 | NM_003942_b01512_R | ACCTAAAGAAAGAGTCCTGAGAGAGATATCTTGAATATCTCTCCAGCACCTCCGG | HL105884 | 12434 | -0.3026     | 0.13719768  | 0.60340971  | -0.49333333 | 0.6147957  | 0.23891867  |
| RFS6K5 | NM_004735_b0666_R  | ACCTAAAGAAAGAGTCCTGAGAGAGATATCTTGAATATCTCTCCAGCACCTCCGG | HL102025 | 331   | -0.052525   | 0.20747934  | 0.95060774  | -2.87766667 | 3.4964076  | 0.14448839  |
| RFS6K5 | NM_004735_b0666_R  | ACCTAAAGAAAGAGTCCTGAGAGAGATATCTTGAATATCTCTCCAGCACCTCCGG | HL102025 | 5707  | -0.43575    | 0.17887007  | 0.53813566  | -4.68966667 | 5.1193476  | 0.17270915  |
| RFS6K5 | NM_004735_b0666_R  | ACCTAAAGAAAGAGTCCTGAGAGAGATATCTTGAATATCTCTCCAGCACCTCCGG | HL102025 | 11083 | 0.114875    | 0.17267302  | 0.05687788  | -1.28032667 | 4.8421126  | 0.1026271   |
| RFS6K5 | NM_004735_b0666_R  | ACCTAAAGAAAGAGTCCTGAGAGAGATATCTTGAATATCTCTCCAGCACCTCCGG | HL102025 | 332   | -0.9681     | 0.10472556  | 0.0698207   | -0.50263333 | 1.0958303  | 0.31617649  |
| RFS6K5 | NM_004735_b0666_R  | ACCTAAAGAAAGAGTCCTGAGAGAGATATCTTGAATATCTCTCCAGCACCTCCGG | HL102025 | 5708  | 0.114875    | 0.17267302  | 0.05687788  | -1.28032667 | 4.8421126  | 0.1026271   |
| RFS6K5 | NM_004735_b0666_R  | ACCTAAAGAAAGAGTCCTGAGAGAGATATCTTGAATATCTCTCCAGCACCTCCGG | HL102025 | 11084 | -1.229      | 0.29774339  | 0.06446209  | -1.42233333 | 1.4310709  | 0.10261979  |
| RFS6K5 | NM_004735_b0666_R  | ACCTAAAGAAAGAGTCCTGAGAGAGATATCTTGAATATCTCTCCAGCACCTCCGG | HL102025 | 333   | -0.48333333 | 0.79581004  | 0.35234883  | -0.1992     | 0.53201301 | 0.52134204  |
| RFS6K5 | NM_004735_b0666_R  | ACCTAAAGAAAGAGTCCTGAGAGAGATATCTTGAATATCTCTCCAGCACCTCCGG | HL102025 | 5709  | 0.0713      | 0.1310707   | 0.70388861  | -0.28636667 | 0.3837298  | 0.279234545 |
| RFS6K5 | NM_004735_b0666_R  | ACCTAAAGAAAGAGTCCTGAGAGAGATATCTTGAATATCTCTCCAGCACCTCCGG | HL102025 | 11085 | -0.263      | 0.55712197  | 0.31370722  | 0.46        | 0.2307407  | 0.60214078  |
| RFS6K6 | NM_014496_b01335_R | ACCTAAAGAAAGAGTCCTGAGAGAGATATCTTGAATATCTCTCCAGCACCTCCGG | HL38613  | 472   | 1.20495     | 0.26301548  | 0.29408391  | -0.7998     | 0.3933901  | 0.63828004  |
| RFS6K6 | NM_014496_b01335_R | ACCTAAAGAAAGAGTCCTGAGAGAGATATCTTGAATATCTCTCCAGCACCTCCGG | HL38613  | 5888  | 1.67975     | 0.20721444  | 0.21264949  | -1.44421333 | 0.2391693  | 0.63828004  |
| RFS6K6 | NM_014496_b01335_R | ACCTAAAGAAAGAGTCCTGAGAGAGATATCTTGAATATCTCTCCAGCACCTCCGG | HL38613  | 11224 | -1.7708     | 0.16607503  | 0.2086441   | -2.78336667 | 6.3074467  | 0.37761597  |
| RFS6K6 | NM_014496_b01335_R | ACCTAAAGAAAGAGTCCTGAGAGAGATATCTTGAATATCTCTCCAGCACCTCCGG | HL38613  | 5849  | -0.306275   | 0.42071461  | 0.14302457  | -5.47033333 | 3.970679   | 0.06749135  |
| RFS6K6 | NM_014496_b01335_R | ACCTAAAGAAAGAGTCCTGAGAGAGATATCTTGAATATCTCTCCAGCACCTCCGG | HL38613  | 11225 | 0.184475    | 0.28703021  | 0.03213844  | 3.61226667  | 2.0877424  | 0.05977667  |
| RFS6K6 | NM_014496_b01335_R | ACCTAAAGAAAGAGTCCTGAGAGAGATATCTTGAATATCTCTCCAGCACCTCCGG | HL38613  | 474   | 0.64843333  | 0.33411459  | 0.65334129  | 0.4888      | 1.8247976  | 0.6178709   |
| RFS6K6 | NM_014496_b01335_R | ACCTAAAGAAAGAGTCCTGAGAGAGATATCTTGAATATCTCTCCAGCACCTCCGG | HL38613  | 5850  | 1.187725    | 0.11227624  | 0.31330447  | 0.8251      | 2.76277005 | 0.56232693  |
| RFS6K6 | NM_014496_b01335_R | ACCTAAAGAAAGAGTCCTGAGAGAGATATCTTGAATATCTCTCCAGCACCTCCGG | HL38613  | 11226 | 0.68326667  | 0.40762244  | 0.71484723  | -0.52466667 | 2.40291382 | 0.64742056  |
| RFS6K6 | NM_014496_b01335_R | ACCTAAAGAAAGAGTCCTGAGAGAGATATCTTGAATATCTCTCCAGCACCTCCGG | HL38613  | 5851  | 0.187725    | 0.11227624  | 0.31330447  | 0.8251      | 2.76277005 | 0.56232693  |
| RFS6K6 | NM_014496_b01335_R | ACCTAAAGAAAGAGTCCTGAGAGAGATATCTTGAATATCTCTCCAGCACCTCCGG | HL38613  | 11227 | 0.9076      | 0.14881478  | 0.01542832  | -0.790375   | 0.18014031 | 0.01782901  |
| RFS6K6 | NM_014496_b01335_R | ACCTAAAGAAAGAGTCCTGAGAGAGATATCTTGAATATCTCTCCAGCACCTCCGG | HL38613  | 46342 | 1.2308      | -0.83733333 | 0.11081669  | -0.10160581 | -0.962125  | 0.10148266  |
| RFS6K6 | NM_014496_b01335_R | ACCTAAAGAAAGAGTCCTGAGAGAGATATCTTGAATATCTCTCCAGCACCTCCGG | HL38613  | 46343 | 1.18        | 0.4761      | 0.01577344  | 0.2211325   | 0.1086461  | 0.01782901  |
| RFS6K6 | NM_014496_b01335_R | ACCTAAAGAAAGAGTCCTGAGAGAGATATCTTGAATATCTCTCCAGCACCTCCGG | HL38613  | 46344 | 5604        | 0.34055     | 0.93979929  | 0.3289667   | -0.175775  | 0.32704803  |
| RFS6K6 | NM_014496_b01335_R | ACCTAAAGAAAGAGTCCTGAGAGAGATATCTTGAATATCTCTCCAGCACCTCCGG | HL38613  | 11070 | 0.187725    | 0.11227624  | 0.31330447  | 0.8251      | 2.76277005 | 0.56232693  |
| RFS6K6 | NM_014496_b01335_R | ACCTAAAGAAAGAGTCCTGAGAGAGATATCTTGAATATCTCTCCAGCACCTCCGG | HL38613  | 46346 | 1554        | 0.6762075   | 0.06713598  | 0.305807854 | 0.22823333 | 0.3338906   |
| RFS6K6 | NM_014496_b01335_R | ACCTAAAGAAAGAGTCCTGAGAGAGATATCTTGAATATCTCTCCAGCACCTCCGG | HL38613  | 6910  | 0.6910      | 0.6910      | 0.6910      | 0.6910      | 0.6910     | 0.6910      |
| RFS6K6 | NM_014496_b01335_R | ACCTAAAGAAAGAGTCCTGAGAGAGATATCTTGAATATCTCTCCAGCACCTCCGG | HL38613  | 11071 | 0.187725    | 0.11227624  | 0.31330447  | 0.8251      | 2.76277005 | 0.56232693  |
| RFS6K6 | NM_014496_b01335_R | ACCTAAAGAAAGAGTCCTGAGAGAGATATCTTGAATATCTCTCCAGCACCTCCGG | HL38613  | 46347 | 5796        | 0.3996667   | 0.27003271  | 0.2446674   | 0.2446674  | 0.2446674   |
| RFS6K6 | NM_014496_b01335_R | ACCTAAAGAAAGAGTCCTGAGAGAGATATCTTGAATATCTCTCCAGCACCTCCGG | HL38613  | 11072 | 0.187725    | 0.11227624  | 0.31330447  | 0.8251      | 2.76277005 | 0.56232693  |
| RFS6K6 | NM_014496_b01335_R | ACCTAAAGAAAGAGTCCTGAGAGAGATATCTTGAATATCTCTCCAGCACCTCCGG | HL38613  | 46348 | 433         | 3.4169      | 0.2633      | 0.2633      | 0.2633     | 0.2633      |
| RFS6K6 | NM_014496_b01335_R | ACCTAAAGAAAGAGTCCTGAGAGAGATATCTTGAATATCTCTCCAGCACCTCCGG | HL38613  | 11073 | 0.187725    | 0.11227624  | 0.31330447  | 0.8251      | 2.76277005 | 0.56232693  |
| RFS6K6 | NM_014496_b01335_R | ACCTAAAGAAAGAGTCCTGAGAGAGATATCTTGAATATCTCTCCAGCACCTCCGG | HL38613  | 46349 | 424         | -1.12975    | 0.54841185  | 0.0607377   | 3.4773     | 0.4248484   |
| RFS6K6 | NM_014496_b01335_R | ACCTAAAGAAAGAGTCCTGAGAGAGATATCTTGAATATCTCTCCAGCACCTCCGG | HL38613  | 5800  | -0.168175   | 0.41617985  | 0.00044801  | 0.3494      | 1.3706363  | 0.68617683  |
| RFS6K6 | NM_014496_b01335_R | ACCTAAAGAAAGAGTCCTGAGAGAGATATCTTGAATATCTCTCCAGCACCTCCGG | HL38613  | 11126 | 1.45745     | 0.01307633  | 0.01307633  | 0.05664667  | 0.16434708 | 0.03039645  |
| RFS6K6 | NM_014496_b01335_R | ACCTAAAGAAAGAGTCCTGAGAGAGATATCTTGAATATCTCTCCAGCACCTCCGG | HL38613  | 425   | -0.98425    | 0.78878829  | 0.01420757  | 1.50633333  | 2.9697337  | 0.30913467  |
| RFS6K6 | NM_014496_b01335_R | ACCTAAAGAAAGAGTCCTGAGAGAGATATCTTGAATATCTCTCCAGCACCTCCGG | HL38613  | 5801  | 0.1256      | 0.2881      | 0.2881      | 0.2881      | 0.2881     | 0.2881      |
| RFS6K6 | NM_014496_b01335_R | ACCTAAAGAAAGAGTCCTGAGAGAGATATCTTGAATATCTCTCCAGCACCTCCGG | HL38613  | 11127 | -0.117475   | 0.70848296  | 0.007709337 | 2.428       | 3.44614084 | 0.19492911  |
| RFS6K6 | NM_014496_b01335_R | ACCTAAAGAAAGAGTCCTGAGAGAGATATCTTGAATATCTCTCCAGCACCTCCGG | HL38613  | 426   | 0.4233      | 0.4233      | 0.4233      | 0.4233      | 0.4233     | 0.4233      |
| RFS6K6 | NM_014496_b01335_R | ACCTAAAGAAAGAGTCCTGAGAGAGATATCTTGAATATCTCTCCAGCACCTCCGG | HL38613  | 11128 | 0.187725    | 0.11227624  | 0.31330447  | 0.8251      | 2.76277005 | 0.56232693  |
| RFS6K6 | NM_014496_b01335_R | ACCTAAAGAAAGAGTCCTGAGAGAGATATCTTGAATATCTCTCCAGCACCTCCGG | HL38613  | 427   | 0.4233      | 0.4233      | 0.4233      | 0.4233      | 0.4233     | 0.4233      |
| RFS6K6 | NM_014496_b01335_R | ACCTAAAGAAAGAGTCCTGAGAGAGATATCTTGAATATCTCTCCAGCACCTCCGG | HL38613  | 11129 | 0.187725    | 0.11227624  | 0.31330447  | 0.8251      | 2.76277005 | 0.56232693  |
| RFS6K6 | NM_014496_b01335_R | ACCTAAAGAAAGAGTCCTGAGAGAGATATCTTGAATATCTCTCCAGCACCTCCGG | HL38613  | 428   | 0.4233      | 0.4233      | 0.4233      | 0.4233      | 0.4233     | 0.4233      |
| RFS6K6 | NM_014496_b01335_R | ACCTAAAGAAAGAGTCCTGAGAGAGATATCTTGAATATCTCTCCAGCACCTCCGG | HL38613  | 11130 | 0.187725    | 0.11227624  | 0.31330447  | 0.8251      | 2.76277005 | 0.56232693  |
| RFS6K6 | NM_014496_b01335_R | ACCTAAAGAAAGAGTCCTGAGAGAGATATCTTGAATATCTCTCCAGCACCTCCGG | HL38613  | 429   | 0.4233      | 0.4233      | 0.4233      | 0.4233      | 0.4233     | 0.4233      |
| RFS6K6 | NM_014496_b01335_R | ACCTAAAGAAAGAGTCCTGAGAGAGATATCTTGAATATCTCTCCAGCACCTCCGG | HL38613  | 11131 | 0.187725    | 0.11227624  | 0.31330447  | 0.8251      | 2.76277005 | 0.56232693  |
| RFS6K6 | NM_014496_b01335_R | ACCTAAAGAAAGAGTCCTGAGAGAGATATCTTGAATATCTCTCCAGCACCTCCGG | HL38613  | 430   | 0.4233      | 0.4233      | 0.4233      | 0.4233      | 0.4233     | 0.4233      |
| RFS6K6 | NM_014496_b01335_R | ACCTAAAGAAAGAGTCCTGAGAGAGATATCTTGAATATCTCTCCAGCACCTCCGG | HL38613  | 11132 | 0.187725    | 0.11227624  | 0.31330447  | 0.8251      | 2.76277005 | 0.56232693  |
| RFS6K6 | NM_014496_b01335_R | ACCTAAAGAAAGAGTCCTGAGAGAGATATCTTGAATATCTCTCCAGCACCTCCGG | HL38613  | 431   | 0.4233      | 0.4233      | 0.4233      | 0.4233      | 0.4233     | 0.4233      |
| RFS6K6 | NM_014496_b01335_R | ACCTAAAGAAAGAGTCCTGAGAGAGATATCTTGAATATCTCTCCAGCACCTCCGG | HL38613  | 11133 | 0.187725    | 0.11227624  | 0.31330447  | 0.8251      | 2.76277005 | 0.56232693  |
| RFS6K6 | NM_014496_b01335_R | ACCTAAAGAAAGAGTCCTGAGAGAGATATCTTGAATATCTCTCCAGCACCTCCGG | HL38613  | 432   | 0.4233      | 0.4233      | 0.4233      | 0.4233      | 0.4233     | 0.4233      |
| RFS6K6 | NM_014496_b01335_R | ACCTAAAGAAAGAGTCCTGAGAGAGATATCTTGAATATCTCTCCAGCACCTCCGG | HL38613  | 11134 | 0.187725    | 0.11227624  | 0.31330447  | 0.8251      | 2.76277005 |             |





|        |                      |                                                            |          |       |             |            |             |             |            |             |
|--------|----------------------|------------------------------------------------------------|----------|-------|-------------|------------|-------------|-------------|------------|-------------|
| SETD8L | NM_012432_362339_r1  | ACCTAAAAGTCTCCGACCAACCAATCATCTCTTGAAATGTTAGTGTGGAGGACGG    | HL591479 | 3022  | 0.42305     | 0.47993851 | 0.11404044  | 1.16575     | 0.56670676 | 0.004687107 |
| SETD8L | NM_012432_362339_r2  | ACCTAAAAGTCTCCGACCAACCAATCATCTCTTGAAATGTTAGTGTGGAGGACGG    | HL591479 | 3028  | 0.4148127   | 0.47993851 | 0.11404044  | 1.11365     | 0.54700676 | 0.004687107 |
| SETD8L | NM_012432_362339_r3  | ACCTAAAAGTCTCCGACCAACCAATCATCTCTTGAAATGTTAGTGTGGAGGACGG    | HL591479 | 13774 | 0.49975     | 0.49380887 | 0.102348747 | 1.162252    | 0.5308874  | 0.003957408 |
| SETD8L | NM_012432_362339_r4  | ACCTAAAAGTCTCCGACCAACCAATCATCTCTTGAAATGTTAGTGTGGAGGACGG    | HL591479 | 13775 | 0.49975     | 0.49380887 | 0.102348747 | 1.162252    | 0.5308874  | 0.003957408 |
| SETD8L | NM_012432_362339_r5  | ACCTAAAAGTCTCCGACCAACCAATCATCTCTTGAAATGTTAGTGTGGAGGACGG    | HL591479 | 8400  | 0.59995     | 0.18722233 | 0.009979917 | 1.162252    | 0.46375794 | 0.24713788  |
| SETD8L | NM_012432_362339_r6  | ACCTAAAAGTCTCCGACCAACCAATCATCTCTTGAAATGTTAGTGTGGAGGACGG    | HL591479 | 8401  | 0.59995     | 0.18722233 | 0.009979917 | 1.162252    | 0.46375794 | 0.24713788  |
| SETD8L | NM_012432_362339_r7  | ACCTAAAAGTCTCCGACCAACCAATCATCTCTTGAAATGTTAGTGTGGAGGACGG    | HL591479 | 13776 | -0.59235    | 0.19172935 | 0.01049798  | -1.15885    | 0.48914695 | 0.546693717 |
| SETD8L | NM_012432_362339_r8  | ACCTAAAAGTCTCCGACCAACCAATCATCTCTTGAAATGTTAGTGTGGAGGACGG    | HL591479 | 3099  | -0.2387     | 0.45314976 | 0.0044137   | -0.04204861 | 0.15610995 | 0.89977711  |
| SETD8L | NM_013195_361714_r1  | ACCTAAAAGGCGCTGACATGACATACATGCTTGAATTTATCTTCATGCGACCGG     | HL390039 | 8471  | -0.14775    | 0.48049919 | 0.03721233  | -0.280475   | 0.67980791 | 0.381192089 |
| SETD8L | NM_013195_361714_r2  | ACCTAAAAGGCGCTGACATGACATACATGCTTGAATTTATCTTCATGCGACCGG     | HL390039 | 13847 | -0.20901    | 0.47321888 | 0.0044137   | -0.16447    | 0.17134046 | 0.9100493   |
| SETD8L | NM_013195_361993_r1  | ACCTAAAAGGAGCATTTTTCATTTATCTTCATGCTTGAATTTATCTTCATGCGACCGG | HL390039 | 3091  | 0.28395     | 0.45064141 | 0.22149571  | 0.44645     | 0.84648089 | 0.11280029  |
| SETD8L | NM_013195_361993_r2  | ACCTAAAAGGAGCATTTTTCATTTATCTTCATGCTTGAATTTATCTTCATGCGACCGG | HL390039 | 8467  | 0.28395     | 0.45064141 | 0.22149571  | 0.44645     | 0.84648089 | 0.11280029  |
| SETD8L | NM_013195_361993_r3  | ACCTAAAAGGAGCATTTTTCATTTATCTTCATGCTTGAATTTATCTTCATGCGACCGG | HL390039 | 13843 | 0.28395     | 0.45064141 | 0.22149571  | 0.44645     | 0.84648089 | 0.11280029  |
| SETD8L | NM_013195_362764_r1  | ACCTAAAAGTCCGCTTCTTCAATGTTCTTCATGCTTGAATTTATCTTCATGCGACCGG | HL390039 | 3093  | -0.99485    | 0.56276960 | 0.10120794  | -0.79420    | 0.80570864 | 0.822726378 |
| SETD8L | NM_013195_362764_r2  | ACCTAAAAGTCCGCTTCTTCAATGTTCTTCATGCTTGAATTTATCTTCATGCGACCGG | HL390039 | 8469  | -0.99179    | 0.46574564 | 0.0044137   | -0.56031    | 0.269242   | 0.100424668 |
| SETD8L | NM_013195_362764_r3  | ACCTAAAAGTCCGCTTCTTCAATGTTCTTCATGCTTGAATTTATCTTCATGCGACCGG | HL390039 | 13845 | -0.54625    | 0.45473961 | 0.11395554  | -0.30475    | 0.89170212 | 0.432117709 |
| SETD8L | NM_06515_36468_r1    | ACCTAAAAGGAGCATTTTTCATTTATCTTCATGCTTGAATTTATCTTCATGCGACCGG | HL473300 | 3004  | 0.45055     | 0.22062484 | 0.00766748  | 1.0211      | 0.68273172 | 0.737579798 |
| SETD8L | NM_06515_36468_r2    | ACCTAAAAGGAGCATTTTTCATTTATCTTCATGCTTGAATTTATCTTCATGCGACCGG | HL473300 | 8380  | 0.659975    | 0.47915311 | 0.07303687  | 0.00381     | 0.96637101 | 0.816021848 |
| SETD8L | NM_06515_36468_r3    | ACCTAAAAGGAGCATTTTTCATTTATCTTCATGCTTGAATTTATCTTCATGCGACCGG | HL473300 | 13756 | 0.53175     | 0.30195881 | 0.02820707  | 0.16444     | 0.9197629  | 0.63161863  |
| SETD8L | NM_06515_36468_r4    | ACCTAAAAGGAGCATTTTTCATTTATCTTCATGCTTGAATTTATCTTCATGCGACCGG | HL473300 | 3008  | -0.94875    | 0.25587233 | 0.00265806  | -0.17475    | 0.19896699 | 0.400150383 |
| SETD8L | NM_06515_36468_r5    | ACCTAAAAGGAGCATTTTTCATTTATCTTCATGCTTGAATTTATCTTCATGCGACCGG | HL473300 | 8384  | -0.93175    | 0.20628409 | 0.00213483  | -1.05979    | 0.19782126 | 0.50614151  |
| SETD8L | NM_06515_36468_r6    | ACCTAAAAGGAGCATTTTTCATTTATCTTCATGCTTGAATTTATCTTCATGCGACCGG | HL473300 | 13760 | -0.4911     | 0.2322611  | 0.00951599  | -0.152475   | 0.229026   | 0.45656512  |
| SETD8L | NM_06515_36468_r7    | ACCTAAAAGGAGCATTTTTCATTTATCTTCATGCTTGAATTTATCTTCATGCGACCGG | HL473300 | 3006  | 0.2768      | 0.31932799 | 0.18211192  | 0.90725     | 0.91680791 | 0.04853631  |
| SETD8L | NM_06515_36468_r8    | ACCTAAAAGGAGCATTTTTCATTTATCTTCATGCTTGAATTTATCTTCATGCGACCGG | HL473300 | 8382  | 0.2514      | 0.32138889 | 0.21952707  | 0.10518     | 0.229026   | 0.45656512  |
| SETD8L | NM_06515_36468_r9    | ACCTAAAAGGAGCATTTTTCATTTATCTTCATGCTTGAATTTATCTTCATGCGACCGG | HL473300 | 13758 | 0.3002      | 0.23420205 | 0.15419842  | 0.69215     | 0.91680791 | 0.04853631  |
| SETD8L | NM_06430_361111_r1   | ACCTAAAAGGAGCATTTTTCATTTATCTTCATGCTTGAATTTATCTTCATGCGACCGG | HL50829  | 1874  | 2.48995     | 1.19929634 | 0.00320233  | 0.14662     | 0.90639999 | 0.041744641 |
| SETD8L | NM_06430_361111_r2   | ACCTAAAAGGAGCATTTTTCATTTATCTTCATGCTTGAATTTATCTTCATGCGACCGG | HL50829  | 7250  | 2.64235     | 1.1164964  | 0.00228482  | -0.03186667 | 3.26593194 | 0.981498973 |
| SETD8L | NM_06430_361111_r3   | ACCTAAAAGGAGCATTTTTCATTTATCTTCATGCTTGAATTTATCTTCATGCGACCGG | HL50829  | 12626 | 3.29625     | 1.40775813 | 0.01489395  | 0.07355667  | 4.60979997 | 0.703460917 |
| SETD8L | NM_06430_361111_r4   | ACCTAAAAGGAGCATTTTTCATTTATCTTCATGCTTGAATTTATCTTCATGCGACCGG | HL50829  | 1876  | 0.39885333  | 0.98310326 | 0.51167286  | 6.2142      | 3.4485977  | 0.03964729  |
| SETD8L | NM_06430_361111_r5   | ACCTAAAAGGAGCATTTTTCATTTATCTTCATGCTTGAATTTATCTTCATGCGACCGG | HL50829  | 7252  | 0.83949     | 1.19641431 | 0.90117287  | 5.526       | 0.0289198  | 0.00397176  |
| SETD8L | NM_06430_361111_r6   | ACCTAAAAGGAGCATTTTTCATTTATCTTCATGCTTGAATTTATCTTCATGCGACCGG | HL50829  | 12628 | 0.19080333  | 1.2819377  | 0.8529078   | 1.58262667  | 6.0119917  | 0.58325074  |
| SETD8L | NM_06430_361111_r7   | ACCTAAAAGGAGCATTTTTCATTTATCTTCATGCTTGAATTTATCTTCATGCGACCGG | HL50829  | 309   | 2.81913333  | 1.2102028  | 0.05659725  | 2.8779      | 1.97741453 | 0.03744408  |
| SETD8L | NM_06430_361111_r8   | ACCTAAAAGGAGCATTTTTCATTTATCTTCATGCTTGAATTTATCTTCATGCGACCGG | HL50829  | 9485  | 6.1215      | 3.141772   | 0.0081903   | 2.94331333  | 2.14631138 | 0.644692094 |
| SETD8L | NM_06430_361111_r9   | ACCTAAAAGGAGCATTTTTCATTTATCTTCATGCTTGAATTTATCTTCATGCGACCGG | HL50829  | 11061 | 4.1263      | 2.41297626 | 0.00709995  | 2.90883333  | 2.00591327 | 0.03752369  |
| SETD8L | NM_06430_361111_r10  | ACCTAAAAGGAGCATTTTTCATTTATCTTCATGCTTGAATTTATCTTCATGCGACCGG | HL50829  | 4027  | 0.308495    | 0.38270903 | 0.12741666  | 0.00000000  | 0.00000000 | 0.00000000  |
| SETD8L | NM_06430_361111_r11  | ACCTAAAAGGAGCATTTTTCATTTATCTTCATGCTTGAATTTATCTTCATGCGACCGG | HL50829  | 9403  | 0.118428333 | 0.2960128  | 0.41878255  | -0.39475    | 0.42573747 | 0.14192682  |
| SETD8L | NM_06430_361111_r12  | ACCTAAAAGGAGCATTTTTCATTTATCTTCATGCTTGAATTTATCTTCATGCGACCGG | HL50829  | 1477  | 0.97125     | 1.0204931  | 0.00210072  | 0.46261     | 0.21007922 | 0.01918847  |
| SETD8L | NM_06430_361111_r13  | ACCTAAAAGGAGCATTTTTCATTTATCTTCATGCTTGAATTTATCTTCATGCGACCGG | HL50829  | 4023  | 5.8464      | 0.3197976  | 0.00093998  | 0.56255     | 0.15448698 | 0.00426226  |
| SETD8L | NM_06430_361111_r14  | ACCTAAAAGGAGCATTTTTCATTTATCTTCATGCTTGAATTTATCTTCATGCGACCGG | HL50829  | 9399  | 0.1983      | 0.00000000 | 0.00000000  | 0.46251     | 0.0564826  | 0.00000000  |
| SETD8L | NM_06430_361111_r15  | ACCTAAAAGGAGCATTTTTCATTTATCTTCATGCTTGAATTTATCTTCATGCGACCGG | HL50829  | 14775 | 4.5036      | 0.68000000 | 0.07903993  | 0.6566667   | 0.8057579  | 0.230241052 |
| SETD8L | NM_06430_361111_r16  | ACCTAAAAGGAGCATTTTTCATTTATCTTCATGCTTGAATTTATCTTCATGCGACCGG | HL50829  | 412   | 0.1933235   | 0.68000000 | 0.07903993  | 0.6566667   | 0.8057579  | 0.230241052 |
| SETD8L | NM_06430_361111_r17  | ACCTAAAAGGAGCATTTTTCATTTATCTTCATGCTTGAATTTATCTTCATGCGACCGG | HL50829  | 5899  | 0.58165     | 0.8774101  | 0.16988688  | 0.11866667  | 0.6276354  | 0.73361186  |
| SETD8L | NM_06430_361111_r18  | ACCTAAAAGGAGCATTTTTCATTTATCTTCATGCTTGAATTTATCTTCATGCGACCGG | HL50829  | 11184 | 0.4879      | 2.40240773 | 0.72000017  | 0.00000000  | 0.8897249  | 0.20605231  |
| SETD8L | NM_06430_361111_r19  | ACCTAAAAGGAGCATTTTTCATTTATCTTCATGCTTGAATTTATCTTCATGCGACCGG | HL50829  | 5925  | 2.66293     | 0.88499542 | 0.23229423  | 10.1616     | 0.00000000 | 0.00000000  |
| SETD8L | NM_06430_361111_r20  | ACCTAAAAGGAGCATTTTTCATTTATCTTCATGCTTGAATTTATCTTCATGCGACCGG | HL47293  | 11301 | 3.0005      | 5.8834014  | 0.24464693  | 8.2416      | 0.00000000 | 0.00000000  |
| SETD8L | NM_06430_361111_r21  | ACCTAAAAGGAGCATTTTTCATTTATCTTCATGCTTGAATTTATCTTCATGCGACCGG | HL47293  | 550   | 0.16466     | 0.81049952 | 0.00000000  | -1.71196667 | 2.2492347  | 0.17939655  |
| SETD8L | NM_06430_361111_r22  | ACCTAAAAGGAGCATTTTTCATTTATCTTCATGCTTGAATTTATCTTCATGCGACCGG | HL47293  | 5926  | -0.11755    | 1.01024931 | 0.78655618  | -1.62056667 | 4.4397617  | 0.45790623  |
| SETD8L | NM_06430_361111_r23  | ACCTAAAAGGAGCATTTTTCATTTATCTTCATGCTTGAATTTATCTTCATGCGACCGG | HL47293  | 11302 | 0.87926     | 0.53300482 | 0.00000000  | 0.00000000  | 0.00000000 | 0.00000000  |
| SETD8L | NM_06430_361111_r24  | ACCTAAAAGGAGCATTTTTCATTTATCTTCATGCTTGAATTTATCTTCATGCGACCGG | HL47293  | 1724  | -0.07275    | 1.6068232  | 0.90781897  | -4.3045     | 3.2331373  | 0.04623136  |
| SETD8L | NM_06430_361111_r25  | ACCTAAAAGGAGCATTTTTCATTTATCTTCATGCTTGAATTTATCTTCATGCGACCGG | HL47293  | 7180  | 0.00000000  | 0.00000000 | 0.00000000  | 0.00000000  | 0.00000000 | 0.00000000  |
| SETD8L | NM_06430_361111_r26  | ACCTAAAAGGAGCATTTTTCATTTATCTTCATGCTTGAATTTATCTTCATGCGACCGG | HL47293  | 12476 | -0.222425   | 1.3030244  | 0.68868056  | -5.30226667 | 2.1091607  | 0.00682523  |
| SETD8L | NM_06430_361111_r27  | ACCTAAAAGGAGCATTTTTCATTTATCTTCATGCTTGAATTTATCTTCATGCGACCGG | HL47293  | 1478  | 0.00000000  | 1.5712444  | 0.90896667  | 0.00000000  | 0.00000000 | 0.00000000  |
| SETD8L | NM_06430_361111_r28  | ACCTAAAAGGAGCATTTTTCATTTATCTTCATGCTTGAATTTATCTTCATGCGACCGG | HL38077  | 5805  | 1.482005    | 1.15506363 | 0.02423448  | 0.4267      | 2.1916227  | 0.55877826  |
| SETD8L | NM_06430_361111_r29  | ACCTAAAAGGAGCATTTTTCATTTATCTTCATGCTTGAATTTATCTTCATGCGACCGG | HL38077  | 11181 | 1.508475    | 0.7903884  | 0.00101544  | 0.67376667  | 2.179889   | 0.52798534  |
| SETD8L | NM_06430_361111_r30  | ACCTAAAAGGAGCATTTTTCATTTATCTTCATGCTTGAATTTATCTTCATGCGACCGG | HL38077  | 1570  | 0.219025    | 0.4247356  | 0.00000000  | 0.00000000  | 0.71287212 | 0.00000000  |
| SETD8L | NM_06430_361111_r31  | ACCTAAAAGGAGCATTTTTCATTTATCTTCATGCTTGAATTTATCTTCATGCGACCGG | HL38077  | 6946  | 3.1128      | 4.4710045  | 0.16456658  | 1.0237      | 6.1987549  | 0.7338085   |
| SETD8L | NM_06430_361111_r32  | ACCTAAAAGGAGCATTTTTCATTTATCTTCATGCTTGAATTTATCTTCATGCGACCGG | HL38077  | 1232  | 0.193295    | 0.4009821  | 0.00000000  | 0.00000000  | 0.00000000 | 0.00000000  |
| SETD8L | NM_06430_361111_r33  | ACCTAAAAGGAGCATTTTTCATTTATCTTCATGCTTGAATTTATCTTCATGCGACCGG | HL38077  | 430   | -0.2188     | 0.52484383 | 0.43137518  | 1.0345      | 0.7081483  | 0.05023128  |
| SETD8L | NM_06430_361111_r34  | ACCTAAAAGGAGCATTTTTCATTTATCTTCATGCTTGAATTTATCTTCATGCGACCGG | HL38077  | 5886  | 0.00000000  | 0.00000000 | 0.00000000  | 0.00000000  | 0.00000000 | 0.00000000  |
| SETD8L | NM_06430_361111_r35  | ACCTAAAAGGAGCATTTTTCATTTATCTTCATGCTTGAATTTATCTTCATGCGACCGG | HL38077  | 11182 | -0.99535    | 0.8124845  | 0.09510451  | 0.4086      | 0.8901475  | 0.37592076  |
| SETD8L | NM_170600_361033_r1  | ACCTAAAAGTCTCCGACCAACCAATCATCTCTTGAAATGTTAGTGTGGAGGACGG    | HL36412  | 3514  | -1.0800333  | 0.2719938  | 0.00602891  | -0.3400125  | 0.38511296 | 0.181146194 |
| SETD8L | NM_170600_361033_r2  | ACCTAAAAGTCTCCGACCAACCAATCATCTCTTGAAATGTTAGTGTGGAGGACGG    | HL36412  | 8890  | -0.7455     | 0.8166288  | 0.08604002  | -0.27827    | 0.2850979  | 0.225164232 |
| SETD8L | NM_170600_361033_r3  | ACCTAAAAGTCTCCGACCAACCAATCATCTCTTGAAATGTTAGTGTGGAGGACGG    | HL36412  | 14266 | -1.05113333 | 0.27676071 | 0.00611974  | -0.2384875  | 0.2148079  | 0.267159391 |
| SETD8L | NM_170600_361033_r4  | ACCTAAAAGTCTCCGACCAACCAATCATCTCTTGAAATGTTAGTGTGGAGGACGG    | HL36412  | 9101  | 0.2864      | 0.8009482  | 0.00000000  | 0.00000000  | 0.00000000 | 0.00000000  |
| SETD8L | NM_170600_361033_r5  | ACCTAAAAGTCTCCGACCAACCAATCATCTCTTGAAATGTTAGTGTGGAGGACGG    | HL36412  | 8886  | -0.30375    | 0.0914027  | 0.02709643  | -0.1233375  | 0.41309149 | 0.615081358 |
| SETD8L | NM_170600_361033_r6  | ACCTAAAAGTCTCCGACCAACCAATCATCTCTTGAAATGTTAGTGTGGAGGACGG    | HL36412  | 14267 | 0.00000000  | 1.04023133 | 0.07859424  | 0.00000000  | 0.00000000 | 0.00000000  |
| SETD8L | NM_170600_361033_r7  | ACCTAAAAGTCTCCGACCAACCAATCATCTCTTGAAATGTTAGTGTGGAGGACGG    | HL36412  | 8888  | 0.419675    | 1.1309441  | 0.40998206  | 0.357625    | 0.70648053 | 0.432634041 |
| SETD8L | NM_170600_361033_r8  | ACCTAAAAGTCTCCGACCAACCAATCATCTCTTGAAATGTTAGTGTGGAGGACGG    | HL36412  | 14268 | 0.88275     | 1.1892633  | 0.59610039  | 0.00000000  | 1.3964222  | 0.9838262   |
| SETD8L | NM_170600_361033_r9  | ACCTAAAAGTCTCCGACCAACCAATCATCTCTTGAAATGTTAGTGTGGAGGACGG    | HL36412  | 3512  | 0.00000000  | 0.3688469  | 0.79040711  | 0.55693333  | 0.4337053  | 0.38241176  |
| SETD8L | NM_170600_361033_r10 | ACCTAAAAGTCTCCGACCAACCAATCATCTCTTGAAATGTTAGTGTGGAGGACGG    | HL51677  | 3827  | 0.027125    | 0.5187304  | 0.92470471  | 0.112       | 0.5480026  | 0.96748378  |
| SETD8L | NM_170600_361033_r11 | ACCTAAAAGTCTCCGACCAACCAATCATCTCTTGAAAT                     |          |       |             |            |             |             |            |             |



|         |                     |                                                    |          |       |              |             |               |             |             |             |              |             |             |
|---------|---------------------|----------------------------------------------------|----------|-------|--------------|-------------|---------------|-------------|-------------|-------------|--------------|-------------|-------------|
| SLC4141 | BX484979_36471_R    | ACCTAAAGAGCTCTGTGGGAAATTCCTTGCGAAATCTCCACCAAGACCGG | HL610037 | 4606  | -0.1378      | 0.54413343  | 0.60083636    | -0.196875   | 0.2741291   | 0.319942614 | 0.0009       | 0.28730752  | 0.99726635  |
| SLC4141 | BX484979_36471_R    | ACCTAAAGAGCTCTGTGGGAAATTCCTTGCGAAATCTCCACCAAGACCGG | HL610037 | 9982  |              |             |               | -0.1055     | 0.2162549   | 0.27494903  |              |             | 0.74051341  |
| SLC4141 | BX484979_36471_R    | ACCTAAAGAGCTCTGTGGGAAATTCCTTGCGAAATCTCCACCAAGACCGG | HL610037 | 15358 | -0.409433333 | 0.48589973  | 0.18970992    | 0.0567      | 0.44477017  | 0.378091576 | -0.075676667 | 0.82789957  | 0.884072554 |
| SLK     | NM_014720_36194_R   | ACCTAAAGAGCTCTGTGGGAAATTCCTTGCGAAATCTCCACCAAGACCGG | HL610037 | 1600  | 0.9894       | 0.6613      | 0.3197        | 0.33358667  | 0.6553      | 0.14613431  |              |             | 0.230545088 |
| SLK     | NM_014720_36194_R   | ACCTAAAGAGCTCTGTGGGAAATTCCTTGCGAAATCTCCACCAAGACCGG | HL610037 | 6906  | 0.854775     | 2.3164641   | 0.38136662    | 0.895866667 | 0.4430362   |             |              |             | 0.230545088 |
| SLK     | NM_014720_36194_R   | ACCTAAAGAGCTCTGTGGGAAATTCCTTGCGAAATCTCCACCAAGACCGG | HL610037 | 12372 | 0.862075     | 2.31591789  | 0.38407253    | 0.956333333 | 1.3714449   | 0.28088665  |              |             |             |
| SLK     | NM_014720_36194_R   | ACCTAAAGAGCTCTGTGGGAAATTCCTTGCGAAATCTCCACCAAGACCGG | HL610037 | 1602  |              |             |               | 0.8993809   | 0.195736603 |             |              |             |             |
| SLK     | NM_014720_36194_R   | ACCTAAAGAGCTCTGTGGGAAATTCCTTGCGAAATCTCCACCAAGACCGG | HL610037 | 6998  | 0.252445     | 1.2162617   | 0.62201702    | 0.127       | 1.27237341  | 0.87910449  |              |             |             |
| SLK     | NM_014720_36194_R   | ACCTAAAGAGCTCTGTGGGAAATTCCTTGCGAAATCTCCACCAAGACCGG | HL610037 | 12374 | -0.5308      | 3.3095233   | 0.46980763    | 0.383333333 | 1.4282789   | 0.611193166 |              |             |             |
| SLK     | NM_014720_36194_R   | ACCTAAAGAGCTCTGTGGGAAATTCCTTGCGAAATCTCCACCAAGACCGG | HL610037 | 496   | 0.441075     | 0.87097361  | 0.25799267    | -1.1796     | 1.9534348   | 0.25779706  |              |             |             |
| SLK     | NM_014720_36194_R   | ACCTAAAGAGCTCTGTGGGAAATTCCTTGCGAAATCTCCACCAAGACCGG | HL610037 | 852   |              |             |               | 0.93278     | 0.348278    | 0.191721    |              |             |             |
| SLK     | NM_014720_36194_R   | ACCTAAAGAGCTCTGTGGGAAATTCCTTGCGAAATCTCCACCAAGACCGG | HL610037 | 11248 | 0.446675     | 1.2057944   | 0.398157398   | -1.9926     | 3.4735665   | 0.27086043  |              |             |             |
| SM4D1   | AC009624_36236_R    | ACCTAAAGAGCTCTGTGGGAAATTCCTTGCGAAATCTCCACCAAGACCGG | HL610037 | 4048  | -0.4882875   | 1.4821937   | 0.00471281    |             |             | -0.3834     | 0.38814718   | 1.33080887  |             |
| SM4D1   | AC009624_36236_R    | ACCTAAAGAGCTCTGTGGGAAATTCCTTGCGAAATCTCCACCAAGACCGG | HL610037 | 9424  | -0.4577825   | 2.2064664   | 0.00821204    |             |             | 0.492224    | 0.20724487   |             |             |
| SM4D1   | AC009624_36236_R    | ACCTAAAGAGCTCTGTGGGAAATTCCTTGCGAAATCTCCACCAAGACCGG | HL610037 | 14800 | -0.6180785   | 0.9946174   | 0.20080101    |             |             | -0.3828     | 0.4730716    | 0.9126790   |             |
| SM4D1   | AC009624_36236_R    | ACCTAAAGAGCTCTGTGGGAAATTCCTTGCGAAATCTCCACCAAGACCGG | HL610037 | 4052  | -0.2561225   | 2.4143383   | 0.19813763    |             |             | 0.27017136  | 0.221138495  |             |             |
| SM4D1   | AC009624_36236_R    | ACCTAAAGAGCTCTGTGGGAAATTCCTTGCGAAATCTCCACCAAGACCGG | HL610037 | 9428  | -0.2390125   | 0.3214827   | 0.21678707    |             |             | 0.079251    | 0.14956977   | 0.688302367 |             |
| SM4D1   | AC009624_36236_R    | ACCTAAAGAGCTCTGTGGGAAATTCCTTGCGAAATCTCCACCAAGACCGG | HL610037 | 14804 | -0.3969265   | 0.1408581   | 0.168193105   |             |             | -0.1021793  | 0.46201907   | 0.931518584 |             |
| SM4D1   | AC009624_36236_R    | ACCTAAAGAGCTCTGTGGGAAATTCCTTGCGAAATCTCCACCAAGACCGG | HL610037 | 4050  | -0.0032662   | 0.83871092  | 0.08209708    |             |             | -0.341725   | 0.30643774   | 0.919674879 |             |
| SM4D1   | AC009624_36236_R    | ACCTAAAGAGCTCTGTGGGAAATTCCTTGCGAAATCTCCACCAAGACCGG | HL610037 | 9426  | -0.3969265   | 0.3804909   | 0.101265083   |             |             | 0.40426     | 0.41827494   | 0.913758126 |             |
| SM4D1   | AC009624_36236_R    | ACCTAAAGAGCTCTGTGGGAAATTCCTTGCGAAATCTCCACCAAGACCGG | HL610037 | 14802 | -0.2288125   | 0.2883028   | 0.245553736   |             |             | -0.2638     | 0.24138661   | 0.22282210  |             |
| SM4D2   | NM_05901_161251_R   | ACCTAAAGAGCTCTGTGGGAAATTCCTTGCGAAATCTCCACCAAGACCGG | HL610037 | 1122  | -0.5891235   | 0.5467905   | 0.063186265   |             |             | 0.1076265   | 0.2369579    | 0.60282058  |             |
| SM4D2   | NM_05901_161251_R   | ACCTAAAGAGCTCTGTGGGAAATTCCTTGCGAAATCTCCACCAAGACCGG | HL610037 | 6498  | -0.472862    | 0.3304909   | 0.039137369   |             |             | 0.0785123   | 0.25615367   | 0.706028314 |             |
| SM4D2   | NM_05901_161251_R   | ACCTAAAGAGCTCTGTGGGAAATTCCTTGCGAAATCTCCACCAAGACCGG | HL610037 | 11874 | -0.6481875   | 0.5311468   | 0.048097265   |             |             | 0.0701735   | 0.2632048    | 0.748066143 |             |
| SM4D2   | NM_05901_161251_R   | ACCTAAAGAGCTCTGTGGGAAATTCCTTGCGAAATCTCCACCAAGACCGG | HL610037 | 1123  | -0.6101265   | 0.1408581   | 0.004377036   |             |             | -0.0826263  | 0.3058765    | 0.700590515 |             |
| SM4D2   | NM_05901_161251_R   | ACCTAAAGAGCTCTGTGGGAAATTCCTTGCGAAATCTCCACCAAGACCGG | HL610037 | 6497  | -0.6099125   | 0.1298258   | 0.06993426    |             |             | -0.1031625  | 0.49191782   | 0.692195647 |             |
| SM4D2   | NM_05901_161251_R   | ACCTAAAGAGCTCTGTGGGAAATTCCTTGCGAAATCTCCACCAAGACCGG | HL610037 | 11873 | -0.6101265   | 0.1408581   | 0.00624535    |             |             | -0.0007375  | 0.4524597    | 0.71313122  |             |
| SM4D2   | NM_05901_161251_R   | ACCTAAAGAGCTCTGTGGGAAATTCCTTGCGAAATCTCCACCAAGACCGG | HL610037 | 12854 | -0.8585875   | 0.1563311   | 0.001197145   |             |             | 0.000073333 | 0.6593557    | 0.998194804 |             |
| SM4D2   | NM_05901_161251_R   | ACCTAAAGAGCTCTGTGGGAAATTCCTTGCGAAATCTCCACCAAGACCGG | HL610037 | 2162  | -1.111425    | 0.2944724   | 0.00899892    |             |             | 0.384       | 0.8537077    | 0.24237348  |             |
| SM4D2   | NM_05901_161251_R   | ACCTAAAGAGCTCTGTGGGAAATTCCTTGCGAAATCTCCACCAAGACCGG | HL610037 | 7478  | -1.01262     | 0.3970939   | 0.001918185   |             |             | -0.5294     | 0.8090011    | 0.21436455  |             |
| SM4D2   | NM_05901_161251_R   | ACCTAAAGAGCTCTGTGGGAAATTCCTTGCGAAATCTCCACCAAGACCGG | HL610037 | 1119  | -0.7782625   | 0.1563311   | 0.00712512    |             |             | 0.005926    | 0.3730437    | 0.978482475 |             |
| SM4D2   | NM_05901_161251_R   | ACCTAAAGAGCTCTGTGGGAAATTCCTTGCGAAATCTCCACCAAGACCGG | HL610037 | 6495  | 0.7666375    | 0.3387272   | 0.009537703   |             |             | 0.0019628   | 0.3272844    | 0.929698862 |             |
| SM4D2   | NM_05901_161251_R   | ACCTAAAGAGCTCTGTGGGAAATTCCTTGCGAAATCTCCACCAAGACCGG | HL610037 | 11871 | -0.8018625   | 0.1537862   | 0.007976213   |             |             | 0.00885     | 0.2818606    | 0.737588186 |             |
| SM4D2   | NM_05901_161251_R   | ACCTAAAGAGCTCTGTGGGAAATTCCTTGCGAAATCTCCACCAAGACCGG | HL610037 | 2160  | -0.1737625   | 0.1382118   | 0.393739703   |             |             | -0.3230785  | 0.2632048    | 0.748066143 |             |
| SM4D2   | NM_05901_161251_R   | ACCTAAAGAGCTCTGTGGGAAATTCCTTGCGAAATCTCCACCAAGACCGG | HL610037 | 11872 | -0.2511225   | 0.1474929   | 0.350735373   |             |             | -0.4320875  | 0.3549873    | 0.189425533 |             |
| SM4D2   | NM_05901_161251_R   | ACCTAAAGAGCTCTGTGGGAAATTCCTTGCGAAATCTCCACCAAGACCGG | HL610037 | 12853 | -0.8585875   | 0.1563311   | 0.001197145   |             |             | 0.0007375   | 0.4524597    | 0.71313122  |             |
| SM4D2   | NM_05901_161251_R   | ACCTAAAGAGCTCTGTGGGAAATTCCTTGCGAAATCTCCACCAAGACCGG | HL610037 | 1120  | -0.0296125   | 0.1408614   | 0.840094737   |             |             | 0.0820125   | 0.1591041    | 0.840025713 |             |
| SM4D2   | NM_05901_161251_R   | ACCTAAAGAGCTCTGTGGGAAATTCCTTGCGAAATCTCCACCAAGACCGG | HL610037 | 6496  | -0.0779265   | 0.1157197   | 0.89494884    |             |             | 0.0050735   | 0.2601446    | 0.80213671  |             |
| SM4D2   | NM_05901_161251_R   | ACCTAAAGAGCTCTGTGGGAAATTCCTTGCGAAATCTCCACCAAGACCGG | HL610037 | 11877 | -0.1551825   | 0.1386346   | 0.008146614   |             |             | 0.0421628   | 0.1250674    | 0.82719371  |             |
| SM4D5   | NM_0100149_361496_R | ACCTAAAGAGCTCTGTGGGAAATTCCTTGCGAAATCTCCACCAAGACCGG | HL617000 | 4904  | 0.668125     | 0.0150790   | 0.00738032    | 1.289125    | 0.1008619   | 0.000136641 |              |             |             |
| SM4D5   | NM_0100149_361496_R | ACCTAAAGAGCTCTGTGGGAAATTCCTTGCGAAATCTCCACCAAGACCGG | HL617000 | 10270 | 0.73304875   | 0.0031550   | 0.000145451   | 1.275125    | 0.1084948   | 0.000291753 |              |             |             |
| SM4D5   | NM_0100149_361496_R | ACCTAAAGAGCTCTGTGGGAAATTCCTTGCGAAATCTCCACCAAGACCGG | HL617000 | 15646 | 0.8023785    | 0.0933560   | 0.00184551    | 1.3502375   | 0.1337164   | 0.000338449 |              |             |             |
| SM4D5   | NM_0100149_361496_R | ACCTAAAGAGCTCTGTGGGAAATTCCTTGCGAAATCTCCACCAAGACCGG | HL617000 | 4890  | 0.231125     | 0.1832763   | 0.000145451   | 1.275125    | 0.1084948   | 0.000291753 |              |             |             |
| SM4D5   | NM_0100149_361496_R | ACCTAAAGAGCTCTGTGGGAAATTCCTTGCGAAATCTCCACCAAGACCGG | HL617000 | 10266 | -0.2738875   | 0.0982665   | 0.09797876    | -0.3691875  | 0.3996970   | 0.13324148  |              |             |             |
| SM4D5   | NM_0100149_361496_R | ACCTAAAGAGCTCTGTGGGAAATTCCTTGCGAAATCTCCACCAAGACCGG | HL617000 | 15642 | -0.0018875   | 0.1197913   | 0.51279979    | 0.0018875   | 0.0018875   | 0.0018875   |              |             |             |
| SM4D5   | NM_0100149_361496_R | ACCTAAAGAGCTCTGTGGGAAATTCCTTGCGAAATCTCCACCAAGACCGG | HL617000 | 4892  | -0.0431875   | 0.0895641   | 0.7574987     | 0.0018875   | 0.0018875   | 0.0018875   |              |             |             |
| SM4D5   | NM_0100149_361496_R | ACCTAAAGAGCTCTGTGGGAAATTCCTTGCGAAATCTCCACCAAGACCGG | HL617000 | 10268 | 0.0741225    | 0.09081028  | 0.60398286    | 0.187625    | 0.1530167   | 0.38155326  |              |             |             |
| SM4D5   | NM_0100149_361496_R | ACCTAAAGAGCTCTGTGGGAAATTCCTTGCGAAATCTCCACCAAGACCGG | HL617000 | 15644 | 0.2016625    | 0.0203276   | 0.000591938   | 0.0018875   | 0.0018875   | 0.0018875   |              |             |             |
| SM4D7   | NM_05904_161276_R   | ACCTAAAGAGCTCTGTGGGAAATTCCTTGCGAAATCTCCACCAAGACCGG | HL65087  | 1104  | 1.1838375    | 0.1940712   | 0.000593938   |             |             | 0.8203875   | 0.2876062    | 0.00712439  |             |
| SM4D7   | NM_05904_161276_R   | ACCTAAAGAGCTCTGTGGGAAATTCCTTGCGAAATCTCCACCAAGACCGG | HL65087  | 6480  | -0.1908125   | 0.1408614   | 0.000593938   |             |             | 0.7820248   | 0.0004428    | 0.0004428   |             |
| SM4D7   | NM_05904_161276_R   | ACCTAAAGAGCTCTGTGGGAAATTCCTTGCGAAATCTCCACCAAGACCGG | HL65087  | 11856 | 1.1698375    | 0.171816    | 0.00049045    |             |             | 0.1084623   | 0.3181503    | 0.009951452 |             |
| SM4D7   | NM_05904_161276_R   | ACCTAAAGAGCTCTGTGGGAAATTCCTTGCGAAATCTCCACCAAGACCGG | HL65087  | 2096  | -0.877625    | 0.1386346   | 0.00049045    |             |             | 0.877625    | 0.00049045   | 0.00049045  |             |
| SM4D7   | NM_05904_161276_R   | ACCTAAAGAGCTCTGTGGGAAATTCCTTGCGAAATCTCCACCAAGACCGG | HL65087  | 7472  | 1.0751375    | 0.7088706   | 0.00125512    |             |             | 0.9463875   | 0.9296203    | 0.51788931  |             |
| SM4D7   | NM_05904_161276_R   | ACCTAAAGAGCTCTGTGGGAAATTCCTTGCGAAATCTCCACCAAGACCGG | HL65087  | 12847 | -0.0018875   | 0.000593938 | 0.000593938   |             |             | -0.0018875  | 0.000593938  | 0.000593938 |             |
| SM4D7   | NM_05904_161276_R   | ACCTAAAGAGCTCTGTGGGAAATTCCTTGCGAAATCTCCACCAAGACCGG | HL65087  | 1103  | -0.080875    | 0.1229012   | 0.950149877   |             |             | -0.5891235  | 0.10734761   | 0.014689731 |             |
| SM4D7   | NM_05904_161276_R   | ACCTAAAGAGCTCTGTGGGAAATTCCTTGCGAAATCTCCACCAAGACCGG | HL65087  | 6479  | -0.1019125   | 0.2182196   | 0.53871494    |             |             | -0.5680475  | 0.0020117    | 0.01722809  |             |
| SM4D7   | NM_05904_161276_R   | ACCTAAAGAGCTCTGTGGGAAATTCCTTGCGAAATCTCCACCAAGACCGG | HL65087  | 11853 | -0.0682375   | 0.2421208   | 0.91548178    |             |             | 0.4548178   | 0.9914978    | 0.0494904   |             |
| SM4D7   | NM_05904_161276_R   | ACCTAAAGAGCTCTGTGGGAAATTCCTTGCGAAATCTCCACCAAGACCGG | HL65087  | 2203  | 3.841375     | 0.1098044   | 0.00013321    | 2.954725    | 0.1649998   | 0.00884499  |              |             |             |
| SM4D7   | NM_05904_161276_R   | ACCTAAAGAGCTCTGTGGGAAATTCCTTGCGAAATCTCCACCAAGACCGG | HL65087  | 7469  | 1.7164875    | 0.000593938 | 0.000593938   | 0.7820248   | 0.000593938 | 0.000593938 |              |             |             |
| SM4D7   | NM_05904_161276_R   | ACCTAAAGAGCTCTGTGGGAAATTCCTTGCGAAATCTCCACCAAGACCGG | HL65087  | 12985 | 0.3091875    | 0.6991565   | 0.000146813   | 1.6677375   | 0.4222048   | 0.09174215  |              |             |             |
| SM4D7   | NM_05904_161276_R   | ACCTAAAGAGCTCTGTGGGAAATTCCTTGCGAAATCTCCACCAAGACCGG | HL65087  | 1130  | 0.298125     | 0.1408614   | 0.000593938   | 0.2561225   | 0.6339746   | 0.64216724  |              |             |             |
| SM4D7   | NM_05904_161276_R   | ACCTAAAGAGCTCTGTGGGAAATTCCTTGCGAAATCTCCACCAAGACCGG | HL65087  | 6506  | -0.236125    | 0.2720084   | 0.21496012    | -0.44688    | 0.6374893   | 0.42461657  |              |             |             |
| SM4D7   | NM_05904_161276_R   | ACCTAAAGAGCTCTGTGGGAAATTCCTTGCGAAATCTCCACCAAGACCGG | HL65087  | 11882 | -0.232375    | 0.1805334   | 0.1764274     | -0.1532765  | 0.4488764   | 0.54783161  |              |             |             |
| SM4D7   | NM_05904_161276_R   | ACCTAAAGAGCTCTGTGGGAAATTCCTTGCGAAATCTCCACCAAGACCGG | HL65087  | 2213  | 0.151125     | 0.260325    | 0.02899017    | 0.8289628   | 0.70314928  | 0.000146813 |              |             |             |
| SM4D7   | NM_05904_161276_R   | ACCTAAAGAGCTCTGTGGGAAATTCCTTGCGAAATCTCCACCAAGACCGG | HL65087  | 7611  | 0.5052625    | 0.2168034   | 0.00175244    | -0.836125   | 0.7137373   | 0.03492924  |              |             |             |
| SM4D7   | NM_05904_161276_R   | ACCTAAAGAGCTCTGTGGGAAATTCCTTGCGAAATCTCCACCAAGACCGG | HL65087  | 12987 | 0.231125     | 0.2884888   | 0.000146813   | 0.7820248   | 0.6992925   | 0.434801139 |              |             |             |
| SM4D7   | NM_05904_161276_R   | ACCTAAAGAGCTCTGTGGGAAATTCCTTGCGAAATCTCCACCAAGACCGG | HL65087  | 12327 | 2.205        | 0.088125    | 0.4547198     | 0.01203662  | 1.0178785   | 0.7605504   | 0.737855126  |             |             |
| SM4D7   | NM_05904_161276_R   | ACCTAAAGAGCTCTGTGGGAAATTCCTTGCGAAATCTCCACCAAGACCGG | HL65087  | 7581  | 0.298125     | 0.1408614   | 0.000593938</ |             |             |             |              |             |             |



|       |           |         |                                                         |          |       |            |           |            |             |            |             |            |            |             |             |            |             |  |
|-------|-----------|---------|---------------------------------------------------------|----------|-------|------------|-----------|------------|-------------|------------|-------------|------------|------------|-------------|-------------|------------|-------------|--|
| SMYD4 | NM_052928 | 3619239 | ACCTAAAGGATGGAGACATCTTCTTCAATCTTGATTAACGACAGATATCTCCAGG | HL364602 | 8805  | 0.36075    | 0.5266390 | 0.25994216 | 0.081875    | 0.0158912  | 0.8114532   | 1.72625    | 0.728528   | 0.0182048   | 0.458875    | 0.7896369  | 0.311885216 |  |
| SMYD4 | NM_052928 | 3619239 | ACCTAAAGGATGGAGACATCTTCTTCAATCTTGATTAACGACAGATATCTCCAGG | HL364602 | 8806  | 0.2285     | 0.5995597 | 0.2179884  | 0.07370     | 0.0095557  | 0.7852104   | 0.2385     | 0.725422   | 0.0122893   | 0.46882     | 0.7865015  | 0.3646194   |  |
| SMYD5 | NM_039548 | 361118  | ACCTAAAAGGAGCACTATCTTCTTCTTCTTGAMGAACAAATGATCTCCGCG     |          | 3411  | -0.0629    | 0.2674843 | 0.779043   | 0.05875     | 0.85972945 | 0.15747806  | 0.901425   | 0.6327956  | 0.06515248  | 0.594975    | 0.3181535  | 0.03136437  |  |
| SMYD5 | NM_039548 | 361118  | ACCTAAAAGGAGCACTATCTTCTTCTTCTTGAMGAACAAATGATCTCCGCG     |          | 3412  | -0.254     | 0.3674843 | 0.779043   | 0.05875     | 0.85972945 | 0.15747806  | 0.901425   | 0.6327956  | 0.06515248  | 0.594975    | 0.3181535  | 0.03136437  |  |
| SMYD5 | NM_039548 | 361118  | ACCTAAAAGGAGCACTATCTTCTTCTTCTTGAMGAACAAATGATCTCCGCG     |          | 1413  | 0.0366667  | 0.2307467 | 0.7931893  | 0.26875     | 0.0794078  | 0.56679848  | 0.89955    | 0.6224948  | 0.07121011  | 0.57377     | 0.4264896  | 0.0097202   |  |
| SMYD5 | NM_039548 | 361246  | ACCTAAAAGGAGCACTATCTTCTTCTTCTTGAMGAACAAATGATCTCCGCG     |          | 3413  | -0.10525   | 0.660408  | 0.7088902  | 0.25475     | 0.1441083  | 0.9073916   | 0.84925    | 0.7603788  | 0.11401863  | 3.26425     | 0.4362004  | 0.00667445  |  |
| SMYD5 | NM_039548 | 361246  | ACCTAAAAGGAGCACTATCTTCTTCTTCTTGAMGAACAAATGATCTCCGCG     |          | 8713  | 0.001      | 0.38775   | 0.784453   | 0.175775    | 0.00953    | 0.7853662   | 0.8705     | 0.7853662  | 0.113414291 | 3.24045     | 0.4707988  | 0.0097202   |  |
| SMYD5 | NM_039548 | 361246  | ACCTAAAAGGAGCACTATCTTCTTCTTCTTGAMGAACAAATGATCTCCGCG     |          | 1415  | -0.26125   | 0.4077288 | 0.2579019  | 2.27245     | 0.1200466  | 0.0077472   | 0.8818     | 0.7272046  | 0.0971679   | 3.3781      | 0.5219185  | 0.00999781  |  |
| SMYD5 | NM_039548 | 361246  | ACCTAAAAGGAGCACTATCTTCTTCTTCTTGAMGAACAAATGATCTCCGCG     |          | 3415  | -0.394     | 0.394     | 0.784453   | 0.175775    | 0.00953    | 0.7853662   | 0.8705     | 0.7853662  | 0.113414291 | 3.24045     | 0.4707988  | 0.0097202   |  |
| SMYD5 | NM_039548 | 361246  | ACCTAAAAGGAGCACTATCTTCTTCTTCTTGAMGAACAAATGATCTCCGCG     |          | 8791  | -0.2126647 | 0.4267557 | 0.154125   | 0.04175     | 0.3666679  | 0.1913793   | 0.15415    | 0.2311265  | 0.27446616  | 0.68282     | 0.4764834  | 0.0104488   |  |
| SMYD5 | NM_039548 | 361246  | ACCTAAAAGGAGCACTATCTTCTTCTTCTTGAMGAACAAATGATCTCCGCG     |          | 1417  | -0.41      | 0.38775   | 0.784453   | 0.175775    | 0.00953    | 0.7853662   | 0.8705     | 0.7853662  | 0.113414291 | 3.24045     | 0.4707988  | 0.0097202   |  |
| SN42  | NM_00308  | 361551  | ACCTAAAAGGAGCACTATCTTCTTCTTCTTGAMGAACAAATGATCTCCGCG     | HL360174 | 1129  | 1.349375   | 0.3370164 | 0.00072116 | -0.0142875  | 0.3629968  | 0.95044541  | -0.0142875 | 0.3629968  | 0.95044541  |             |            |             |  |
| SN42  | NM_00308  | 361551  | ACCTAAAAGGAGCACTATCTTCTTCTTCTTGAMGAACAAATGATCTCCGCG     | HL360174 | 6505  | 1.143875   | 0.3813978 | 0.0010123  | -0.0052375  | 0.352587   | 0.93257491  | -0.0052375 | 0.352587   | 0.93257491  |             |            |             |  |
| SN42  | NM_00308  | 361551  | ACCTAAAAGGAGCACTATCTTCTTCTTCTTGAMGAACAAATGATCTCCGCG     | HL360174 | 1181  | 1.38875    | 0.3863798 | 0.0009744  | 0.175775    | 0.00953    | 0.7853662   | 0.8705     | 0.7853662  | 0.113414291 | 3.24045     | 0.4707988  | 0.0097202   |  |
| SN42  | NM_00308  | 361701  | ACCTAAAAGGAGCACTATCTTCTTCTTCTTGAMGAACAAATGATCTCCGCG     | HL360174 | 1116  | -0.380375  | 0.1870815 | 0.0590780  | 0.838125    | 0.1818685  | 0.25312621  | 0.838125   | 0.1818685  | 0.25312621  |             |            |             |  |
| SN42  | NM_00308  | 361701  | ACCTAAAAGGAGCACTATCTTCTTCTTCTTGAMGAACAAATGATCTCCGCG     | HL360174 | 6402  | -0.413775  | 0.1631136 | 0.03496107 | 0.120785    | 0.18509551 | 0.2517777   | 0.120785   | 0.18509551 | 0.2517777   |             |            |             |  |
| SN42  | NM_00308  | 361701  | ACCTAAAAGGAGCACTATCTTCTTCTTCTTGAMGAACAAATGATCTCCGCG     | HL360174 | 11868 | -0.391475  | 0.2072315 | 0.04972375 | 0.850625    | 0.16967808 | 0.21972625  | 0.850625   | 0.16967808 | 0.21972625  |             |            |             |  |
| SN42  | NM_00308  | 361701  | ACCTAAAAGGAGCACTATCTTCTTCTTCTTGAMGAACAAATGATCTCCGCG     | HL360174 | 2201  | 0.422325   | 0.9462395 | 0.32584362 | -0.115375   | 0.3160441  | 0.02189466  | -0.115375  | 0.3160441  | 0.02189466  |             |            |             |  |
| SN42  | NM_00308  | 361861  | ACCTAAAAGGAGCACTATCTTCTTCTTCTTGAMGAACAAATGATCTCCGCG     | HL360174 | 7577  | 0.3152125  | 0.9887989 | 0.4701041  | -0.079625   | 0.3128284  | 0.73294798  | -0.079625  | 0.3128284  | 0.73294798  |             |            |             |  |
| SN42  | NM_00308  | 361861  | ACCTAAAAGGAGCACTATCTTCTTCTTCTTGAMGAACAAATGATCTCCGCG     | HL360174 | 12953 | 0.3484875  | 0.9780951 | 0.460124   | -0.0932625  | 0.3257278  | 0.67953039  | -0.0932625 | 0.3257278  | 0.67953039  |             |            |             |  |
| SN42  | NM_00308  | 361861  | ACCTAAAAGGAGCACTATCTTCTTCTTCTTGAMGAACAAATGATCTCCGCG     | HL360174 | 12953 | 1.1213     | 0.4203145 | 0.0097265  | 0.1327      | 0.936275   | 0.78118226  | 0.1327     | 0.936275   | 0.78118226  |             |            |             |  |
| SN42  | NM_00308  | 361861  | ACCTAAAAGGAGCACTATCTTCTTCTTCTTGAMGAACAAATGATCTCCGCG     | HL360174 | 6977  | -0.1075    | 0.1634464 | 0.0119912  | 0.1493333   | 0.944604   | 0.7617873   | -0.1075    | 0.1634464  | 0.0119912   | 0.1493333   | 0.944604   | 0.7617873   |  |
| SN42  | NM_00308  | 361861  | ACCTAAAAGGAGCACTATCTTCTTCTTCTTGAMGAACAAATGATCTCCGCG     | HL360174 | 11473 | -0.0466667 | 0.339828  | 0.00972796 | 0.1115333   | 0.92028669 | 0.71773704  | -0.0466667 | 0.339828   | 0.00972796  | 0.1115333   | 0.92028669 | 0.71773704  |  |
| SN42  | NM_00308  | 361861  | ACCTAAAAGGAGCACTATCTTCTTCTTCTTGAMGAACAAATGATCTCCGCG     | HL360174 | 1943  | -0.3186    | 0.2436201 | 0.32102444 | -0.22975    | 0.4186784  | 0.33792118  | -0.22975   | 0.4186784  | 0.33792118  |             |            |             |  |
| SN42  | NM_00308  | 361861  | ACCTAAAAGGAGCACTATCTTCTTCTTCTTGAMGAACAAATGATCTCCGCG     | HL360174 | 7319  | -0.16165   | 0.1699176 | 0.0121893  | 0.120785    | 0.18509551 | 0.2517777   | 0.120785   | 0.18509551 | 0.2517777   |             |            |             |  |
| SN42  | NM_00308  | 361861  | ACCTAAAAGGAGCACTATCTTCTTCTTCTTGAMGAACAAATGATCTCCGCG     | HL360174 | 12695 | -0.1633    |           |            | 0.2236333   | 0.2946127  | 0.3951321   | 0.2236333  | 0.2946127  | 0.3951321   |             |            |             |  |
| SN42  | NM_00308  | 361861  | ACCTAAAAGGAGCACTATCTTCTTCTTCTTGAMGAACAAATGATCTCCGCG     | HL360174 | 722   | 0.8993333  | 0.637391  | 0.2045836  | 0.06675     | 0.9868317  | 0.49342562  | 0.06675    | 0.9868317  | 0.49342562  |             |            |             |  |
| SN42  | NM_00308  | 361861  | ACCTAAAAGGAGCACTATCTTCTTCTTCTTGAMGAACAAATGATCTCCGCG     | HL360174 | 6087  | 0.7        | 1.1241538 | 0.2400871  | 0.4565      | 0.2277765  | 0.88684513  | 0.4565     | 0.2277765  | 0.88684513  |             |            |             |  |
| SN42  | NM_00308  | 361861  | ACCTAAAAGGAGCACTATCTTCTTCTTCTTGAMGAACAAATGATCTCCGCG     | HL360174 | 11474 | -0.04745   | 0.1795707 | 0.2889813  | 0.4096      | 0.4995286  | 0.6887804   | 0.4096     | 0.4995286  | 0.6887804   |             |            |             |  |
| SN42  | NM_00308  | 361861  | ACCTAAAAGGAGCACTATCTTCTTCTTCTTGAMGAACAAATGATCTCCGCG     | HL360174 | 12663 | -0.0785    | 0.4119347 | 0.0055883  | -0.29425    | 0.765374   | 0.42745478  | -0.0785    | 0.4119347  | 0.0055883   | -0.29425    | 0.765374   | 0.42745478  |  |
| SN42  | NM_00308  | 361861  | ACCTAAAAGGAGCACTATCTTCTTCTTCTTGAMGAACAAATGATCTCCGCG     | HL360174 | 7639  | -0.209725  | 0.6209991 | 0.00704872 | -0.29225    | 0.1931341  | 0.11469096  | -0.29225   | 0.1931341  | 0.11469096  |             |            |             |  |
| SN42  | NM_00308  | 361861  | ACCTAAAAGGAGCACTATCTTCTTCTTCTTGAMGAACAAATGATCTCCGCG     | HL360174 | 13915 | 0.180875   | 0.4779794 | 0.82021028 | 0.04375     | 0.4068468  | 0.84914411  | 0.04375    | 0.4068468  | 0.84914411  |             |            |             |  |
| SN42  | NM_00308  | 361861  | ACCTAAAAGGAGCACTATCTTCTTCTTCTTGAMGAACAAATGATCTCCGCG     | HL360174 | 12663 | -0.249725  | 0.5798841 | 0.37624349 | -0.3185     | 0.453748   | 0.1744904   | -0.3185    | 0.453748   | 0.1744904   |             |            |             |  |
| SN42  | NM_00308  | 361861  | ACCTAAAAGGAGCACTATCTTCTTCTTCTTGAMGAACAAATGATCTCCGCG     | HL360174 | 7641  | -0.30375   | 0.4798482 | 0.34830173 | 0.14325     | 0.2160549  | 0.47414919  | 0.14325    | 0.2160549  | 0.47414919  |             |            |             |  |
| SN42  | NM_00308  | 361861  | ACCTAAAAGGAGCACTATCTTCTTCTTCTTGAMGAACAAATGATCTCCGCG     | HL360174 | 13017 | -0.26525   | 1.6821739 | 0.70554123 | 0.317125    | 0.8499791  | 0.36484549  | 0.317125   | 0.8499791  | 0.36484549  |             |            |             |  |
| SN42  | NM_00308  | 361861  | ACCTAAAAGGAGCACTATCTTCTTCTTCTTGAMGAACAAATGATCTCCGCG     | HL360174 | 10475 | -0.18475   | 0.1932425 | 0.0111333  | 0.1086768   | 0.5411903  | 0.18475     | 0.1932425  | 0.0111333  | 0.1086768   | 0.5411903   |            |             |  |
| SN42  | NM_00308  | 361861  | ACCTAAAAGGAGCACTATCTTCTTCTTCTTGAMGAACAAATGATCTCCGCG     | HL360174 | 11119 | -0.36565   | 0.8212242 | 0.3397403  | 0.7997333   | 0.1049781  | 0.23287114  | 0.7997333  | 0.1049781  | 0.23287114  |             |            |             |  |
| SN42  | NM_00308  | 361861  | ACCTAAAAGGAGCACTATCTTCTTCTTCTTGAMGAACAAATGATCTCCGCG     | HL360174 | 11495 | -0.449     | 0.2597296 | 0.1792419  | 0.8077667   | 0.9062129  | 0.1919318   | -0.449     | 0.2597296  | 0.1792419   | 0.8077667   | 0.9062129  | 0.1919318   |  |
| SN42  | NM_00308  | 361861  | ACCTAAAAGGAGCACTATCTTCTTCTTCTTGAMGAACAAATGATCTCCGCG     | HL360174 | 5932  | 0.4242425  | 0.2807028 | 0.0294774  | 0.231       | 1.3084117  | 0.6276393   | 0.4242425  | 0.2807028  | 0.0294774   | 0.231       | 1.3084117  | 0.6276393   |  |
| SN42  | NM_00308  | 361861  | ACCTAAAAGGAGCACTATCTTCTTCTTCTTGAMGAACAAATGATCTCCGCG     | HL360174 | 5899  | -0.06625   | 0.4470303 | 0.1505818  | 0.7771      | 1.1493707  | 0.28358062  | -0.06625   | 0.4470303  | 0.1505818   | 0.7771      | 1.1493707  | 0.28358062  |  |
| SN42  | NM_00308  | 361861  | ACCTAAAAGGAGCACTATCTTCTTCTTCTTGAMGAACAAATGATCTCCGCG     | HL360174 | 11275 | 0.6424948  | 0.0600058 | 0.3993333  | 0.64941839  | 0.46481839 | 0.6424948   | 0.0600058  | 0.3993333  | 0.64941839  | 0.46481839  | 0.6424948  |             |  |
| SN42  | NM_00308  | 361861  | ACCTAAAAGGAGCACTATCTTCTTCTTCTTGAMGAACAAATGATCTCCGCG     | HL360174 | 524   | 0.00775    | 1.303447  | 0.9014617  | 0.45466667  | 0.7817864  | 0.3557439   | 0.00775    | 1.303447   | 0.9014617   | 0.45466667  | 0.7817864  | 0.3557439   |  |
| SN42  | NM_00308  | 361861  | ACCTAAAAGGAGCACTATCTTCTTCTTCTTGAMGAACAAATGATCTCCGCG     | HL360174 | 9960  | 0.02925    | 0.46735   | 0.298602   | 0.02925     | 0.46735    | 0.298602    | 0.02925    | 0.46735    | 0.298602    | 0.02925     | 0.46735    | 0.298602    |  |
| SN42  | NM_00308  | 361861  | ACCTAAAAGGAGCACTATCTTCTTCTTCTTGAMGAACAAATGATCTCCGCG     | HL360174 | 11276 | 0.00785    | 1.3612444 | 0.98938054 | -0.34346667 | 0.6218895  | 0.39846274  | 0.00785    | 1.3612444  | 0.98938054  | -0.34346667 | 0.6218895  | 0.39846274  |  |
| SN42  | NM_00308  | 361861  | ACCTAAAAGGAGCACTATCTTCTTCTTCTTGAMGAACAAATGATCTCCGCG     | HL360174 | 525   | -0.4005    | 0.30525   | 0.120978   | 0.105       | 1.0078905  | 0.8158346   | -0.4005    | 0.30525    | 0.120978    | 0.105       | 1.0078905  | 0.8158346   |  |
| SN42  | NM_00308  | 361861  | ACCTAAAAGGAGCACTATCTTCTTCTTCTTGAMGAACAAATGATCTCCGCG     | HL360174 | 5901  | -1.247     | 1.0547296 | 0.0139814  | -0.0881333  | 0.1449713  | 0.82566667  | -1.247     | 1.0547296  | 0.0139814   | -0.0881333  | 0.1449713  | 0.82566667  |  |
| SN42  | NM_00308  | 361861  | ACCTAAAAGGAGCACTATCTTCTTCTTCTTGAMGAACAAATGATCTCCGCG     | HL360174 | 11277 | -0.791     | 0.3632823 | 0.0891107  | -0.1946667  | 0.8600386  | 0.720911583 | -0.791     | 0.3632823  | 0.0891107   | -0.1946667  | 0.8600386  | 0.720911583 |  |
| SN42  | NM_00308  | 361861  | ACCTAAAAGGAGCACTATCTTCTTCTTCTTGAMGAACAAATGATCTCCGCG     | HL360174 | 386   | 0.02925    | 0.46735   | 0.298602   | 0.02925     | 0.46735    | 0.298602    | 0.02925    | 0.46735    | 0.298602    | 0.02925     | 0.46       |             |  |









|       |                    |                                                              |           |       |             |             |             |             |            |             |             |
|-------|--------------------|--------------------------------------------------------------|-----------|-------|-------------|-------------|-------------|-------------|------------|-------------|-------------|
| TA92  | NM_000544_361363.R | ACCTAAAGATGCGACCGCTGGTATCATATCTTCTGATATATATATACAGGCTGTCCAGCG | HS.502    | 2554  | 1.543525    | 0.93279755  | 0.000225758 |             | 0.6417625  | 0.7168175   | 0.06639102  |
| TA92  | NM_000544_361363.R | ACCTAAAGATGCGACCGCTGGTATCATATCTTCTGATATATATATACAGGCTGTCCAGCG | HS.502    | 793   | 1.020242    | 0.93279755  | 0.000225758 |             | 0.6417625  | 0.7168175   | 0.06639102  |
| TA92  | NM_000544_361363.R | ACCTAAAGATGCGACCGCTGGTATCATATCTTCTGATATATATATACAGGCTGTCCAGCG | HS.502    | 1306  | 3.962375    | 1.14779249  | 0.00032772  |             | 0.6962125  | 0.7040554   | 0.050751846 |
| TA92  | NM_000544_361363.R | ACCTAAAGATGCGACCGCTGGTATCATATCTTCTGATATATATATACAGGCTGTCCAGCG | HS.502    | 473   | 0.401224    | 0.93279755  | 0.000225758 | 0.2803265   | 0.32053708 | 0.310838704 |             |
| TC104 | NM_375032_361038.R | ACCTAAAGATGCGACCGCTGGTATCATATCTTCTGATATATATATACAGGCTGTCCAGCG | HS.10112  | 10112 | -0.0273625  | 1.054322    | 0.00447066  | 0.3794125   | 0.4882995  | 0.51291305  |             |
| TC104 | NM_375032_361038.R | ACCTAAAGATGCGACCGCTGGTATCATATCTTCTGATATATATATACAGGCTGTCCAGCG | HS.15488  | 15488 | 1.1796265   | 0.1426669   | 0.256751225 | 0.4678626   | 0.28011055 | 0.041399042 |             |
| TC104 | NM_375032_361038.R | ACCTAAAGATGCGACCGCTGGTATCATATCTTCTGATATATATATACAGGCTGTCCAGCG | HS.473    | 473   | -0.8104125  | 0.134681326 | 0.00447066  | -0.4677626  | 0.27491667 | 0.013874756 |             |
| TC104 | NM_375032_361038.R | ACCTAAAGATGCGACCGCTGGTATCATATCTTCTGATATATATATACAGGCTGTCCAGCG | HS.10114  | 10114 | -0.7862375  | 0.134283783 | 0.00070336  | -0.7091375  | 0.24384666 | 0.000661214 |             |
| TC104 | NM_375032_361038.R | ACCTAAAGATGCGACCGCTGGTATCATATCTTCTGATATATATATACAGGCTGTCCAGCG | HS.15490  | 15490 | 0.7464025   | 0.134283783 | 0.00070336  | 0.13727885  | 0.24384666 | 0.000661214 |             |
| TC104 | NM_375032_361038.R | ACCTAAAGATGCGACCGCTGGTATCATATCTTCTGATATATATATACAGGCTGTCCAGCG | HS.473629 | 2378  | -0.618625   | 0.20478209  | 0.01142223  |             | -0.2847875 | 0.3258543   | 0.309713001 |
| TC104 | NM_375032_361038.R | ACCTAAAGATGCGACCGCTGGTATCATATCTTCTGATATATATATACAGGCTGTCCAGCG | HS.473629 | 7254  | -0.1851025  | 0.134283783 | 0.00070336  |             | 0.7464025  | 0.7709789   | 0.02028117  |
| TC104 | NM_375032_361038.R | ACCTAAAGATGCGACCGCTGGTATCATATCTTCTGATATATATATACAGGCTGTCCAGCG | HS.473629 | 1310  | -0.52745    | 0.19308708  | 0.026182709 |             | -0.2179875 | 0.2715969   | 0.044017075 |
| TC104 | NM_375032_361038.R | ACCTAAAGATGCGACCGCTGGTATCATATCTTCTGATATATATATACAGGCTGTCCAGCG | HS.473629 | 2350  | 0.03489     | 0.19308708  | 0.026182709 |             | 0.0232870  | 0.0851345   | 0.004699202 |
| TC104 | NM_375032_361038.R | ACCTAAAGATGCGACCGCTGGTATCATATCTTCTGATATATATATACAGGCTGTCCAGCG | HS.473629 | 7724  | 0.8153      | 0.60179511  | 0.02430641  |             | 0.8028479  | 0.9352865   | 0.062901204 |
| TC104 | NM_375032_361038.R | ACCTAAAGATGCGACCGCTGGTATCATATCTTCTGATATATATATACAGGCTGTCCAGCG | HS.473629 | 13102 | 0.861725    | 0.63113174  | 0.02319839  |             | 0.2721225  | 0.6437407   | 0.31482043  |
| TC104 | NM_375032_361038.R | ACCTAAAGATGCGACCGCTGGTATCATATCTTCTGATATATATATACAGGCTGTCCAGCG | HS.473629 | 2352  | -1.3709     | 0.33009751  | 0.00071851  |             | 0.4514875  | 0.7403446   | 0.242782803 |
| TC104 | NM_375032_361038.R | ACCTAAAGATGCGACCGCTGGTATCATATCTTCTGATATATATATACAGGCTGTCCAGCG | HS.473629 | 7728  | -1.30125    | 0.41337865  | 0.00179196  |             | -0.3341625 | 0.7239101   | 0.384648209 |
| TC104 | NM_375032_361038.R | ACCTAAAGATGCGACCGCTGGTATCATATCTTCTGATATATATATACAGGCTGTCCAGCG | HS.473629 | 3104  | -1.23975    | 0.3945427   | 0.00411128  |             | -0.3735750 | 0.6835346   | 0.311732525 |
| TK1   | NM_013254_361347.R | ACCTAAAGATGCGACCGCTGGTATCATATCTTCTGATATATATATACAGGCTGTCCAGCG | HS.50874  | 438   | -0.4251     | 0.70512482  | 0.01276044  | 1.217533    | 0.84712003 |             |             |
| TK1   | NM_013254_361347.R | ACCTAAAGATGCGACCGCTGGTATCATATCTTCTGATATATATATACAGGCTGTCCAGCG | HS.50874  | 5804  | -0.9959     | 1.0353434   | 0.15789718  | 0.80313333  | 1.70211026 |             |             |
| TK1   | NM_013254_361347.R | ACCTAAAGATGCGACCGCTGGTATCATATCTTCTGATATATATATACAGGCTGTCCAGCG | HS.50874  | 11180 | -0.405725   | 0.134283783 | 0.00070336  | 0.4189202   | 0.19556667 |             |             |
| TK1   | NM_013254_361347.R | ACCTAAAGATGCGACCGCTGGTATCATATCTTCTGATATATATATACAGGCTGTCCAGCG | HS.50874  | 1566  | 1.30515     | 0.14983475  | 0.33468307  | -0.40665667 | 3.7915408  | 0.79420675  |             |
| TK1   | NM_013254_361347.R | ACCTAAAGATGCGACCGCTGGTATCATATCTTCTGATATATATATACAGGCTGTCCAGCG | HS.50874  | 6942  | 2.4923      | 0.83383225  | 0.00070336  | 0.00070336  | 0.00070336 | 0.00070336  |             |
| TK1   | NM_013254_361347.R | ACCTAAAGATGCGACCGCTGGTATCATATCTTCTGATATATATATACAGGCTGTCCAGCG | HS.50874  | 12318 | 2.29625     | 0.19141727  | 0.30520767  | -1.1387     | 0.53797078 | 0.656094241 |             |
| TK1   | NM_013254_361347.R | ACCTAAAGATGCGACCGCTGGTATCATATCTTCTGATATATATATACAGGCTGTCCAGCG | HS.50874  | 6944  | -0.70355    | 1.64741043  | 0.28064643  | -1.44166667 | 0.6060125  | 0.013028183 |             |
| TK1   | NM_013254_361347.R | ACCTAAAGATGCGACCGCTGGTATCATATCTTCTGATATATATATACAGGCTGTCCAGCG | HS.50874  | 12320 | -0.9463     | 0.19161271  | 0.263616786 | -1.75203333 | 1.0558881  | 0.020232038 |             |
| TK1   | NM_013254_361347.R | ACCTAAAGATGCGACCGCTGGTATCATATCTTCTGATATATATATACAGGCTGTCCAGCG | HS.50874  | 6946  | 0.5066      |             | 0.4884      |             |            |             |             |
| TK1   | NM_013254_361347.R | ACCTAAAGATGCGACCGCTGGTATCATATCTTCTGATATATATATACAGGCTGTCCAGCG | HS.94790  | 8414  | 0.2001075   | 0.80405968  | 0.00110585  |             | -0.7887    | 1.30900544  | 0.7151398   |
| TK1   | NM_013254_361347.R | ACCTAAAGATGCGACCGCTGGTATCATATCTTCTGATATATATATACAGGCTGTCCAGCG | HS.94790  | 13780 | 1.849245    | 0.44029269  | 0.00081866  |             | 0.054475   | 1.0838852   | 0.90118503  |
| TK1   | NM_013254_361347.R | ACCTAAAGATGCGACCGCTGGTATCATATCTTCTGATATATATATACAGGCTGTCCAGCG | HS.94790  | 3038  | 1.8782      | 0.50570874  | 0.003147189 |             | 0.810      |             |             |
| TK1   | NM_013254_361347.R | ACCTAAAGATGCGACCGCTGGTATCATATCTTCTGATATATATATACAGGCTGTCCAGCG | HS.94790  | 3036  | 1.08993333  | 0.15902019  | 0.00328203  |             | 0.147925   | 0.437888    | 0.53485758  |
| TK1   | NM_013254_361347.R | ACCTAAAGATGCGACCGCTGGTATCATATCTTCTGATATATATATACAGGCTGTCCAGCG | HS.94790  | 8412  | 1.27993333  | 0.72184764  | 0.019676125 |             | 0.006025   | 0.9255685   | 0.87501784  |
| TK1   | NM_013254_361347.R | ACCTAAAGATGCGACCGCTGGTATCATATCTTCTGATATATATATACAGGCTGTCCAGCG | HS.94790  | 13788 | 1.18733333  | 0.2185627   | 0.00336287  |             | 0.4223     | 1.1036783   | 0.3297981   |
| TK1   | NM_013254_361347.R | ACCTAAAGATGCGACCGCTGGTATCATATCTTCTGATATATATATACAGGCTGTCCAGCG | HS.94790  | 3034  | -0.3429     | 0.54813056  | 0.37273903  |             | 0.07025    | 0.6430011   | 0.15307941  |
| TK1   | NM_013254_361347.R | ACCTAAAGATGCGACCGCTGGTATCATATCTTCTGATATATATATACAGGCTGTCCAGCG | HS.94790  | 8410  | -0.22435    | 0.55111928  | 0.49259178  |             | 0.4626     | 0.6240939   | 0.15329317  |
| TK1   | NM_013254_361347.R | ACCTAAAGATGCGACCGCTGGTATCATATCTTCTGATATATATATACAGGCTGTCCAGCG | HS.94790  | 13728 | 0.2235      | 0.134283783 | 0.00070336  |             | 0.00070336 | 0.00070336  | 0.00070336  |
| TK1   | NM_013254_361347.R | ACCTAAAGATGCGACCGCTGGTATCATATCTTCTGATATATATATACAGGCTGTCCAGCG | HS.94790  | 8412  | -0.13245    | 0.7594622   | 0.66899584  | 0.173735    | 0.2979782  | 0.3790555   | 0.1963666   |
| TK1   | NM_013254_361347.R | ACCTAAAGATGCGACCGCTGGTATCATATCTTCTGATATATATATACAGGCTGTCCAGCG | HS.94790  | 13721 | 0.9972      | 0.0807265   | 0.79927434  | 0.1664      | 0.15791327 | 0.30610963  | 0.19706667  |
| TK1   | NM_013254_361347.R | ACCTAAAGATGCGACCGCTGGTATCATATCTTCTGATATATATATACAGGCTGTCCAGCG | HS.94790  | 13781 | 0.30966466  | 0.134283783 | 0.00070336  | 0.7603      | 0.60775073 | 0.14915912  |             |
| TK1   | NM_013254_361347.R | ACCTAAAGATGCGACCGCTGGTATCATATCTTCTGATATATATATACAGGCTGTCCAGCG | HS.94790  | 4908  | 0.4071      | 1.3181256   | 0.47386663  | 1.21575     | 1.1106449  | 0.05481778  | -1.4218     |
| TK1   | NM_013254_361347.R | ACCTAAAGATGCGACCGCTGGTATCATATCTTCTGATATATATATACAGGCTGTCCAGCG | HS.94790  | 9912  | 0.42385     | 0.18811396  | 0.74887891  | 1.140265    | 0.7457313  | 0.00358138  |             |
| TK1   | NM_013254_361347.R | ACCTAAAGATGCGACCGCTGGTATCATATCTTCTGATATATATATACAGGCTGTCCAGCG | HS.94790  | 13731 | 0.53703333  | 1.48821831  | 0.51410422  | 1.220525    | 1.2011745  | 0.06767103  | -1.9246667  |
| TK1   | NM_013254_361347.R | ACCTAAAGATGCGACCGCTGGTATCATATCTTCTGATATATATATACAGGCTGTCCAGCG | HS.94790  | 4650  | -0.4609     | 0.74073918  | 0.00070336  |             | 0.00070336 | 0.00070336  | 0.00070336  |
| TK1   | NM_013254_361347.R | ACCTAAAGATGCGACCGCTGGTATCATATCTTCTGATATATATATACAGGCTGTCCAGCG | HS.94790  | 9976  | -0.5679     | 0.8001781   | 0.51143124  | -0.3497     | 0.5897262  | 0.35176615  | 0.05939181  |
| TK1   | NM_013254_361347.R | ACCTAAAGATGCGACCGCTGGTATCATATCTTCTGATATATATATACAGGCTGTCCAGCG | HS.94790  | 13733 | 0.51875     | 0.4833221   | 0.30230882  | -0.2526     | 0.4898781  | 0.09719737  | 0.8127      |
| TK1   | NM_013254_361347.R | ACCTAAAGATGCGACCGCTGGTATCATATCTTCTGATATATATATACAGGCTGTCCAGCG | HS.94790  | 4681  | -0.088785   | 0.67893265  | 0.00070336  | 0.5326      | 1.0293344  | 0.59197109  | 0.116194785 |
| TK1   | NM_013254_361347.R | ACCTAAAGATGCGACCGCTGGTATCATATCTTCTGATATATATATACAGGCTGTCCAGCG | HS.94790  | 10057 | -0.071825   | 0.5669434   | 0.78898746  | -0.302875   | 0.0288792  | 0.48718511  |             |
| TK1   | NM_013254_361347.R | ACCTAAAGATGCGACCGCTGGTATCATATCTTCTGATATATATATACAGGCTGTCCAGCG | HS.94790  | 1543  | 0.241325    | 0.7240248   | 0.00070336  |             | 0.00070336 | 0.00070336  | 0.00070336  |
| TK1   | NM_013254_361347.R | ACCTAAAGATGCGACCGCTGGTATCATATCTTCTGATATATATATACAGGCTGTCCAGCG | HS.94790  | 4685  | -0.4949125  | 0.37497408  | 0.05128805  | 0.257125    | 0.43734542 | 0.30181816  |             |
| TK1   | NM_013254_361347.R | ACCTAAAGATGCGACCGCTGGTATCATATCTTCTGATATATATATACAGGCTGTCCAGCG | HS.94790  | 10059 | 0.1914325   | 1.0066162   | 0.00070336  |             | 0.00070336 | 0.00070336  | 0.00070336  |
| TK1   | NM_013254_361347.R | ACCTAAAGATGCGACCGCTGGTATCATATCTTCTGATATATATATACAGGCTGTCCAGCG | HS.94790  | 15437 | -0.183875   | 0.3397033   | 0.36473708  | 0.155375    | 0.2436813  | 0.24918305  |             |
| TK1   | NM_013254_361347.R | ACCTAAAGATGCGACCGCTGGTATCATATCTTCTGATATATATATACAGGCTGTCCAGCG | HS.94790  | 4683  | 1.149225    | 0.134283783 | 0.00070336  |             | 0.00070336 | 0.00070336  | 0.00070336  |
| TK1   | NM_013254_361347.R | ACCTAAAGATGCGACCGCTGGTATCATATCTTCTGATATATATATACAGGCTGTCCAGCG | HS.94790  | 10059 | 1.1499      | 0.14661913  | 0.00266491  |             | -0.0952875 | 0.58681328  | 0.73786165  |
| TK1   | NM_013254_361347.R | ACCTAAAGATGCGACCGCTGGTATCATATCTTCTGATATATATATACAGGCTGTCCAGCG | HS.94790  | 15431 | 0.134283783 | 0.00070336  | 0.00070336  |             | 0.00070336 | 0.00070336  | 0.00070336  |
| TK1   | NM_013254_361347.R | ACCTAAAGATGCGACCGCTGGTATCATATCTTCTGATATATATATACAGGCTGTCCAGCG | HS.94790  | 4681  | -0.010785   | 1.0311029   | 0.00070336  | 0.0899735   | 0.48443119 | 0.74784842  |             |
| TK1   | NM_013254_361347.R | ACCTAAAGATGCGACCGCTGGTATCATATCTTCTGATATATATATACAGGCTGTCCAGCG | HS.54594  | 2185  | -0.010785   | 1.0311029   | 0.00070336  |             | -0.5382125 | 0.3638216   | 0.05066665  |
| TK1   | NM_013254_361347.R | ACCTAAAGATGCGACCGCTGGTATCATATCTTCTGATATATATATACAGGCTGTCCAGCG | HS.54594  | 7561  | 0.023975    | 0.1490444   | 0.90297873  |             | -0.541325  | 0.38209189  | 0.05195033  |
| TK1   | NM_013254_361347.R | ACCTAAAGATGCGACCGCTGGTATCATATCTTCTGATATATATATACAGGCTGTCCAGCG | HS.54594  | 12917 | 0.4603875   | 0.3073911   | 0.27392984  |             | 0.197925   | 0.32176763  | 0.0074834   |
| TK1   | NM_013254_361347.R | ACCTAAAGATGCGACCGCTGGTATCATATCTTCTGATATATATATACAGGCTGTCCAGCG | HS.54594  | 2187  | -0.492075   | 0.3952782   | 0.05691052  |             | -1.7399    |             |             |
| TK1   | NM_013254_361347.R | ACCTAAAGATGCGACCGCTGGTATCATATCTTCTGATATATATATACAGGCTGTCCAGCG | HS.54594  | 7563  | -0.5014875  | 0.134283783 | 0.00070336  |             | 1.3403     |             |             |
| TK1   | NM_013254_361347.R | ACCTAAAGATGCGACCGCTGGTATCATATCTTCTGATATATATATACAGGCTGTCCAGCG | HS.54594  | 12939 | -0.5457875  | 0.3778866   | 0.03738181  |             | -1.425     |             |             |
| TK1   | NM_013254_361347.R | ACCTAAAGATGCGACCGCTGGTATCATATCTTCTGATATATATATACAGGCTGTCCAGCG | HS.54594  | 2189  | -0.9687875  | 0.134283783 | 0.00070336  |             | -0.974925  | 0.3487374   | 0.09177914  |
| TK1   | NM_013254_361347.R | ACCTAAAGATGCGACCGCTGGTATCATATCTTCTGATATATATATACAGGCTGTCCAGCG | HS.54594  | 7535  | 2.977625    | 0.2910511   | 1.1E-05     |             | 0.492735   | 1.0554378   | 0.27666962  |
| TK1   | NM_013254_361347.R | ACCTAAAGATGCGACCGCTGGTATCATATCTTCTGATATATATATACAGGCTGTCCAGCG | HS.54594  | 12911 | 0.385575    | 0.1113097   | 0.71E-05    |             |            |             |             |











|      |                    |                                                             |        |           |              |             |             |             |             |             |
|------|--------------------|-------------------------------------------------------------|--------|-----------|--------------|-------------|-------------|-------------|-------------|-------------|
| TNK  | XM_039796_362043.R | ACCTAAAAGTGGGATCTTCACAGTATGCTTTCGACATATGTAAGTGAAGACATCGGAGC | 1992   | -0.048375 | 0.35787775   | 0.82674721  | -0.48045    | 0.52114708  | 0.117836784 |             |
| TNK  | XM_039796_362043.R | ACCTAAAAGTGGGATCTTCACAGTATGCTTTCGACATATGTAAGTGAAGACATCGGAGC | 738    | 0.5114    | 0.35787775   | 0.82674721  | 0.2343818   | 0.855479294 | 0.000000000 |             |
| TNK  | XM_039796_362043.R | ACCTAAAAGTGGGATCTTCACAGTATGCTTTCGACATATGTAAGTGAAGACATCGGAGC | 12744  | 0.50105   | 0.43683731   | 0.113923489 | -0.13753    | 1.01860203  | 0.738447407 |             |
| TNK  | XM_039796_362043.R | ACCTAAAAGTGGGATCTTCACAGTATGCTTTCGACATATGTAAGTGAAGACATCGGAGC | 6204   | -0.29275  | 0.37907571   | 0.597301154 | -0.15812333 | 0.2294438   | 0.358814709 |             |
| TNK  | XM_039796_362043.R | ACCTAAAAGTGGGATCTTCACAGTATGCTTTCGACATATGTAAGTGAAGACATCGGAGC | 204    | 0.30625   | 0.45002778   | 0.213779856 | -0.544075   | 0.7335845   | 0.415350350 |             |
| TNK  | XM_039796_362043.R | ACCTAAAAGTGGGATCTTCACAGTATGCTTTCGACATATGTAAGTGAAGACATCGGAGC | 11580  | -0.35025  | 0.39582209   | 0.13627653  | -0.546775   | 0.8978544   | 0.22868471  |             |
| TNK  | XM_039796_362043.R | ACCTAAAAGTGGGATCTTCACAGTATGCTTTCGACATATGTAAGTGAAGACATCGGAGC | 298    | 0.522975  | 0.2895788    | 0.103633945 |             |             |             |             |
| TNP1 | NM_006058_361820.R | ACCTAAAAGTGGGATCTTCACAGTATGCTTTCGACATATGTAAGTGAAGACATCGGAGC | 8272   | 0.4615    | 0.1462144    | 0.02305859  | -0.4514     | 0.1682749   | 0.054929239 |             |
| TNP1 | NM_006058_361820.R | ACCTAAAAGTGGGATCTTCACAGTATGCTTTCGACATATGTAAGTGAAGACATCGGAGC | 1364   | 0.4566    | 0.1513738    | 0.00000000  | 0.4639      | 0.0000000   | 0.037242919 |             |
| TNP1 | NM_006058_361828.R | ACCTAAAAGTGGGATCTTCACAGTATGCTTTCGACATATGTAAGTGAAGACATCGGAGC | 2894   | 2.11215   | 0.3669951    | 0.00010143  | 1.265125    | 0.05941608  | 0.00726115  |             |
| TNP1 | NM_006058_361828.R | ACCTAAAAGTGGGATCTTCACAGTATGCTTTCGACATATGTAAGTGAAGACATCGGAGC | 8270   | 0.12396   | 0.1513738    | 0.00000000  | 0.4639      | 0.0000000   | 0.2238180   |             |
| TNP1 | NM_006058_361828.R | ACCTAAAAGTGGGATCTTCACAGTATGCTTTCGACATATGTAAGTGAAGACATCGGAGC | 13646  | 1.974     | 0.12106202   | 2.89E-05    |             |             |             |             |
| TNP1 | NM_006058_361828.R | ACCTAAAAGTGGGATCTTCACAGTATGCTTTCGACATATGTAAGTGAAGACATCGGAGC | 2898   | -1.4911   | 0.2707162    | 0.00124856  | -0.9884     |             |             |             |
| TNP1 | NM_006058_361828.R | ACCTAAAAGTGGGATCTTCACAGTATGCTTTCGACATATGTAAGTGAAGACATCGGAGC | 8274   | 4.272     | 0.13102296   | 0.000295313 |             |             |             |             |
| TNP1 | NM_006058_361828.R | ACCTAAAAGTGGGATCTTCACAGTATGCTTTCGACATATGTAAGTGAAGACATCGGAGC | 13650  | -1.3814   | 0.3812223    | 0.0094305   | -1.1376     | 0.67320443  | 0.04387236  |             |
| TNP2 | NM_024309_361153.R | ACCTAAAAGGAGGACGATCTTGAGAGTCTTTCGATATGTAAGTGAAGACATCGGAGC   | 8276   | 0.30625   | 0.45002778   | 0.213779856 | 0.41071     | 0.5500287   | 0.004959059 |             |
| TNP2 | NM_024309_361153.R | ACCTAAAAGGAGGACGATCTTGAGAGTCTTTCGATATGTAAGTGAAGACATCGGAGC   | 13652  | 0.1571    | 0.5689579    | 0.56547338  | 1.09375     | 0.95941608  | 0.00726115  |             |
| TNP2 | NM_024309_361153.R | ACCTAAAAGGAGGACGATCTTGAGAGTCTTTCGATATGTAAGTGAAGACATCGGAGC   | 2900   | 0.029175  | 0.35459159   | 0.00937810  | 1.0498      | 0.2667695   | 0.01702267  |             |
| TNP2 | NM_024309_361550.R | ACCTAAAAGGCAAGTCTTGAGAGACATCTTTCGATATGTAAGTGAAGACATCGGAGC   | 13651  | 0.8429    | 0.3606103    | 0.00674408  | 1.1935      | 1.3798205   | 0.08862366  |             |
| TNP2 | NM_024309_361550.R | ACCTAAAAGGCAAGTCTTGAGAGACATCTTTCGATATGTAAGTGAAGACATCGGAGC   | 2902   | 0.9629    | 0.3988368    | 0.016618377 | 1.66679     | 0.4685066   | 0.01702267  |             |
| TNP2 | NM_024309_361550.R | ACCTAAAAGGCAAGTCTTGAGAGACATCTTTCGATATGTAAGTGAAGACATCGGAGC   | 13654  | 0.30123   | 0.30633454   | 0.07542878  | 0.7104      | 0.84148556  | 0.05867639  |             |
| TNP2 | NM_024309_361640.R | ACCTAAAAGTCCAGATCTTGAGAGACATCTTTCGATATGTAAGTGAAGACATCGGAGC  | 2904   | -0.4073   | 0.3799927    | 0.05205568  | -0.2017     | 0.6902322   | 0.52864218  |             |
| TNP2 | NM_024309_361640.R | ACCTAAAAGTCCAGATCTTGAGAGACATCTTTCGATATGTAAGTGAAGACATCGGAGC  | 8280   | 0.7083    | 0.3863989    | 0.064179415 | 1.0498      | 0.2667695   | 0.01702267  |             |
| TNP2 | NM_024309_361640.R | ACCTAAAAGTCCAGATCTTGAGAGACATCTTTCGATATGTAAGTGAAGACATCGGAGC  | 13656  | -0.7509   | 0.3067805    | 0.00716099  | -1.12825    | 0.32010519  | 0.589669379 |             |
| TNK1 | NM_003985_361618.R | ACCTAAAAGGAGGACGATCTTGAGAGTCTTTCGATATGTAAGTGAAGACATCGGAGC   | 1920   | -0.20976  | 0.5030193    | 0.41483814  |             |             |             |             |
| TNK1 | NM_003985_361618.R | ACCTAAAAGGAGGACGATCTTGAGAGTCTTTCGATATGTAAGTGAAGACATCGGAGC   | 5608   | -1.6425   | 0.5832049    | 0.5559388   | -0.545879   | 0.2887875   | 0.03187842  |             |
| TNK1 | NM_003985_361618.R | ACCTAAAAGGAGGACGATCTTGAGAGTCTTTCGATATGTAAGTGAAGACATCGGAGC   | 10984  | -0.25875  | 0.5937993    | 0.37616845  | -0.499725   | 0.3043205   | 0.04232725  |             |
| TNK1 | NM_003985_361618.R | ACCTAAAAGGAGGACGATCTTGAGAGTCTTTCGATATGTAAGTGAAGACATCGGAGC   | 1696   | 0.155     | 0.33812556   | 0.43363852  | 0.029873    | 0.871165    | 0.92943674  |             |
| TNK1 | NM_003985_361618.R | ACCTAAAAGGAGGACGATCTTGAGAGTCTTTCGATATGTAAGTGAAGACATCGGAGC   | 7072   | 0.6175    | 0.4097448    | 0.41139883  | -0.099125   | 0.2753166   | 0.74831793  |             |
| TNK1 | NM_003985_361618.R | ACCTAAAAGGAGGACGATCTTGAGAGTCTTTCGATATGTAAGTGAAGACATCGGAGC   | 120420 | 0.122725  | 0.37486093   | 0.5597171   | 0.068079    | 0.6694814   | 0.82766265  |             |
| TNK2 | NM_05781_361624.R  | ACCTAAAAGGCAAGTCTTGAGAGACATCTTTCGATATGTAAGTGAAGACATCGGAGC   | 11583  | 435       | 3.43335      | 1.6254472   | 0.0003398   | 0.2142      | 2.1932729   | 0.407403278 |
| TNK2 | NM_05781_361624.R  | ACCTAAAAGGCAAGTCTTGAGAGACATCTTTCGATATGTAAGTGAAGACATCGGAGC   | 8811   | 0.12045   | 1.4151468    | 0.00411316  | 1.0213      | 2.4466682   | 0.437772012 |             |
| TNK2 | NM_05781_361624.R  | ACCTAAAAGGCAAGTCTTGAGAGACATCTTTCGATATGTAAGTGAAGACATCGGAGC   | 11583  | 1187      | 5.47845      | 3.0243678   | 0.005839    | 1.5761      | 3.1831318   | 0.33151623  |
| TNK2 | NM_05781_361624.R  | ACCTAAAAGGCAAGTCTTGAGAGACATCTTTCGATATGTAAGTGAAGACATCGGAGC   | 4316   | 0.9008    | 1.0593272    | 0.22610072  | 1.059022    | 0.9192712   | 0.51464682  |             |
| TNK2 | NM_05781_361624.R  | ACCTAAAAGGCAAGTCTTGAGAGACATCTTTCGATATGTAAGTGAAGACATCGGAGC   | 11583  | 5812      | 8.24775      | 1.0770439   | 0.11661976  | -0.1034     | 4.2480763   | 0.6023232   |
| TNK2 | NM_05781_361624.R  | ACCTAAAAGGCAAGTCTTGAGAGACATCTTTCGATATGTAAGTGAAGACATCGGAGC   | 11583  | 1188      | 5.47845      | 3.0243678   | 0.005839    | 1.5761      | 3.1831318   | 0.33151623  |
| TNK5 | AF08257_361538.R   | ACCTAAAAGGCGGACTTGAGAGTCTTTCGATATGTAAGTGAAGACATCGGAGC       | 173027 | 4794      | 0.1452875    | 0.41149657  | 0.51057748  | 0.6270948   | 0.04492275  |             |
| TNK5 | AF08257_361538.R   | ACCTAAAAGGCGGACTTGAGAGTCTTTCGATATGTAAGTGAAGACATCGGAGC       | 173027 | 1079      | -0.017375    | 0.3309117   | 0.928916425 | -0.572825   | 0.2318786   | 0.020745391 |
| TNK5 | AF08257_361538.R   | ACCTAAAAGGCGGACTTGAGAGTCTTTCGATATGTAAGTGAAGACATCGGAGC       | 173027 | 1552      | 0.476473     | 0.3292926   | 0.46999114  | -0.492375   | 0.324446    | 0.61738442  |
| TNK5 | AF08257_361906.R   | ACCTAAAAGGTGGTATCTTCCTTCCTTCATCTTGAGAGGAGGAGGATTAACACCGG    | 173027 | 4798      | 0.6848875    | 0.4228385   | 0.02178845  | -0.588825   | 0.7164939   | 0.13117766  |
| TNK5 | AF08257_361906.R   | ACCTAAAAGGTGGTATCTTCCTTCCTTCATCTTGAGAGGAGGAGGATTAACACCGG    | 10174  | 0.4268825 | 0.4544309219 | 0.464330027 |             |             |             |             |
| TNK5 | AF08257_361906.R   | ACCTAAAAGGTGGTATCTTCCTTCCTTCATCTTGAGAGGAGGAGGATTAACACCGG    | 173027 | 15550     | 0.625125     | 0.3981282   | 0.02643608  | -0.478765   | 0.6007780   | 0.15105217  |
| TNK5 | AF08257_361918.R   | ACCTAAAAGGCGGACTTGAGAGTCTTTCGATATGTAAGTGAAGACATCGGAGC       | 4796   | 0.4594625 | 0.3798266    | 0.00000000  |             |             |             |             |
| TNK5 | AF08257_361918.R   | ACCTAAAAGGCGGACTTGAGAGTCTTTCGATATGTAAGTGAAGACATCGGAGC       | 173027 | 10172     | 1.096256     | 0.3501133   | 0.00104948  | -0.266125   | 0.6208882   | 0.50262949  |
| TNK5 | AF08257_361918.R   | ACCTAAAAGGCGGACTTGAGAGTCTTTCGATATGTAAGTGAAGACATCGGAGC       | 173027 | 15583     | 1.2841875    | 0.3988368   | 0.0113475   | 0.3845799   | 1.68858556  | 0.0000000   |
| TNK3 | NM_015978_361413.R | ACCTAAAAGTCCAGTCTTGAGAGACATCTTTCGATATGTAAGTGAAGACATCGGAGC   | 48085  | 1680      | 1.97175      | 1.5527975   | 0.0274468   | 0.7668667   | 1.7230291   | 0.388088161 |
| TNK3 | NM_015978_361413.R | ACCTAAAAGTCCAGTCTTGAGAGACATCTTTCGATATGTAAGTGAAGACATCGGAGC   | 48085  | 7056      | 1.9975       | 1.5989187   | 0.02409056  | 1.6936333   | 3.047479    | 0.00217421  |
| TNK3 | NM_015978_361413.R | ACCTAAAAGTCCAGTCTTGAGAGACATCTTTCGATATGTAAGTGAAGACATCGGAGC   | 48085  | 12432     | 0.6175       | 0.4097448   | 0.41139883  | -0.099125   | 0.2753166   | 0.74831793  |
| TNK3 | NM_015978_361413.R | ACCTAAAAGTCCAGTCTTGAGAGACATCTTTCGATATGTAAGTGAAGACATCGGAGC   | 48085  | 544       | -0.1605      | 0.3413377   | 0.9342693   | 0.02985     | 0.5284385   | 0.8246408   |
| TNK3 | NM_015978_361413.R | ACCTAAAAGTCCAGTCTTGAGAGACATCTTTCGATATGTAAGTGAAGACATCGGAGC   | 9020   | 0.20075   | 0.3988368    | 0.0069573   | 0.20075     | 0.3988368   | 0.0069573   |             |
| TNK3 | NM_015978_361413.R | ACCTAAAAGTCCAGTCTTGAGAGACATCTTTCGATATGTAAGTGAAGACATCGGAGC   | 48085  | 11296     | -0.451025    | 0.4396758   | 0.16685959  | 0.20456667  | 1.3743602   | 0.761454278 |
| TNK3 | NM_015978_361413.R | ACCTAAAAGTCCAGTCTTGAGAGACATCTTTCGATATGTAAGTGAAGACATCGGAGC   | 48085  | 2537      | 0.6493       | 0.41149657  | 0.51057748  | 0.6270948   | 0.04492275  |             |
| TNK3 | NM_015978_361413.R | ACCTAAAAGTCCAGTCTTGAGAGACATCTTTCGATATGTAAGTGAAGACATCGGAGC   | 48085  | 8013      | -0.5047333   | 0.4379774   | 0.14764826  | -0.089625   | 0.2347671   | 0.334565014 |
| TNK3 | NM_015978_361413.R | ACCTAAAAGTCCAGTCTTGAGAGACATCTTTCGATATGTAAGTGAAGACATCGGAGC   | 13809  | 13809     | 0.107135     | 0.0437202   | 0.00000000  | 0.107135    | 0.1724022   | 0.91414543  |
| TNK3 | NM_015978_361413.R | ACCTAAAAGTCCAGTCTTGAGAGACATCTTTCGATATGTAAGTGAAGACATCGGAGC   | 26827  | 2639      | 0.675075     | 0.1954764   | 0.0084875   | -0.1012375  | 0.4279244   | 0.04205177  |
| TNK3 | NM_015978_361413.R | ACCTAAAAGTCCAGTCTTGAGAGACATCTTTCGATATGTAAGTGAAGACATCGGAGC   | 26827  | 8015      | 0.702        | 0.3097212   | 0.00894246  | -0.1960875  | 0.4327924   | 0.53798817  |
| TNK3 | NM_015978_361413.R | ACCTAAAAGTCCAGTCTTGAGAGACATCTTTCGATATGTAAGTGAAGACATCGGAGC   | 13809  | 13809     | 0.107135     | 0.0437202   | 0.00000000  | 0.107135    | 0.1724022   | 0.91414543  |
| TNK3 | NM_015978_361413.R | ACCTAAAAGTCCAGTCTTGAGAGACATCTTTCGATATGTAAGTGAAGACATCGGAGC   | 13809  | 13809     | 0.107135     | 0.0437202   | 0.00000000  | 0.107135    | 0.1724022   | 0.91414543  |
| TNK3 | NM_015978_361413.R | ACCTAAAAGTCCAGTCTTGAGAGACATCTTTCGATATGTAAGTGAAGACATCGGAGC   | 26827  | 2639      | 0.675075     | 0.1954764   | 0.0084875   | -0.1012375  | 0.4279244   | 0.04205177  |
| TNK3 | NM_015978_361413.R | ACCTAAAAGTCCAGTCTTGAGAGACATCTTTCGATATGTAAGTGAAGACATCGGAGC   | 26827  | 8015      | 0.702        | 0.3097212   | 0.00894246  | -0.1960875  | 0.4327924   | 0.53798817  |
| TNK3 | NM_015978_361413.R | ACCTAAAAGTCCAGTCTTGAGAGACATCTTTCGATATGTAAGTGAAGACATCGGAGC   | 13809  | 13809     | 0.107135     | 0.0437202   | 0.00000000  | 0.107135    | 0.1724022   | 0.91414543  |
| TNK3 | NM_015978_361413.R | ACCTAAAAGTCCAGTCTTGAGAGACATCTTTCGATATGTAAGTGAAGACATCGGAGC   | 13809  | 13809     | 0.107135     | 0.0437202   | 0.00000000  | 0.107135    | 0.1724022   | 0.91414543  |
| TNK3 | NM_015978_361413.R | ACCTAAAAGTCCAGTCTTGAGAGACATCTTTCGATATGTAAGTGAAGACATCGGAGC   | 26827  | 2639      | 0.675075     | 0.1954764   | 0.0084875   | -0.1012375  | 0.4279244   | 0.04205177  |
| TNK3 | NM_015978_361413.R | ACCTAAAAGTCCAGTCTTGAGAGACATCTTTCGATATGTAAGTGAAGACATCGGAGC   | 26827  | 8015      | 0.702        | 0.3097212   | 0.00894246  | -0.1960875  | 0.4327924   | 0.53798817  |
| TNK3 | NM_015978_361413.R | ACCTAAAAGTCCAGTCTTGAGAGACATCTTTCGATATGTAAGTGAAGACATCGGAGC   | 13809  | 13809     | 0.107135     | 0.0437202   | 0.00000000  | 0.107135    | 0.1724022   | 0.91414543  |
| TNK3 | NM_015978_361413.R | ACCTAAAAGTCCAGTCTTGAGAGACATCTTTCGATATGTAAGTGAAGACATCGGAGC   | 13809  | 13809     | 0.107135     | 0.0437202   | 0.00000000  | 0.107135    | 0.1724022   | 0.91414543  |
| TNK3 | NM_015978_361413.R | ACCTAAAAGTCCAGTCTTGAGAGACATCTTTCGATATGTAAGTGAAGACATCGGAGC   | 26827  | 2639      | 0.675075     | 0.1954764   | 0.0084875   | -0.1012375  | 0.4279244   | 0.04205177  |
| TNK3 | NM_015978_361413.R | ACCTAAAAGTCCAGTCTTGAGAGACATCTTTCGATATGTAAGTGAAGACATCGGAGC   | 26827  | 8015      | 0.702        | 0.3097212   | 0.00894246  | -0.1960875  | 0.4327924   | 0.53798817  |
| TNK3 | NM_015978_361413.R | ACCTAAAAGTCCAGTCTTGAGAGACATCTTTCGATATGTAAGTGAAGACATCGGAGC   | 13809  | 13809     | 0.107135     | 0.0437202   | 0.00000000  | 0.107135    | 0.1724022   | 0.91414543  |
| TNK3 | NM_015978_361413.R | ACCTAAAAGTCCAGTCTTGAGAGACATCTTTCGATATGTAAGTGAAGACATCGGAGC   | 13809  | 13809     | 0.107135     | 0.0437202   | 0.00000000  | 0.107135    | 0.1724022   | 0.91414543  |
| TNK3 | NM_015978_361413.R | ACCTAAAAGTCCAGTCTTGAGAGACATCTTTCGATATGTAAGTGAAGACATCGGAGC   | 26827  | 2639      | 0.675075     | 0.1954764   | 0.0084875   | -0.1012375  | 0.4279244   | 0.04205177  |
| TNK3 | NM_015978_361413.R | ACCTAAAAGTCCAGTCTTGAGAGACATCTTTCGATATGTAAGTGAAGACATCGGAGC   | 26827  | 8015      | 0.702        | 0.3097212   | 0.00894246  | -0.1960875  | 0.4327924   | 0.53798817  |
| TNK3 | NM_015978_361413.R | ACCTAAAAGTCCAGTCTTGAGAGACATCTTTCGATATGTAAGTGAAGACATCGGAGC   | 13809  | 13809     | 0.107135     | 0.0437202   | 0.00000000  | 0.107135    | 0.1724022   | 0.91414543  |
| TNK3 | NM_015978_361413.R | ACCTAAAAGTCCAGTCTTGAGAGACATCTTTCGATATGTAAGTGAAGACATCGGAGC   | 13809  | 13809     | 0.107135     | 0.0437202   | 0.00000000  | 0.107135    | 0.1724022   | 0.91414543  |
| TNK3 | NM_015978_361413.R | ACCTAAAAGTCCAGTCTTGAGAGACATCTTTCGATATGTAAGTGAAGACATCGGAGC   | 26827  | 2639      | 0.675075     | 0.1954764   | 0.0084875   | -0.1012375  | 0.4279      |             |













|       |                    |                                                          |          |       |            |            |             |             |             |             |
|-------|--------------------|----------------------------------------------------------|----------|-------|------------|------------|-------------|-------------|-------------|-------------|
| USF35 | AB37793_361434_r   | ACCTAAAAGGACAGARGATTCGCAAAATCTCTTGAATTCCTGGACATCTTGTCCGG | HL31349  | 3725  | 0.7845     | 0.29629481 | 0.006181316 | 0.0252375   | 0.10377343  | 0.78680018  |
| USF35 | AB37793_361435_r   | ACCTAAAAGGACAGARGATTCGCAAAATCTCTTGAATTCCTGGACATCTTGTCCGG | HL31349  | 3726  | 0.80257195 | 0.13497241 | 0.00216547  | 0.1217929   | 0.15716667  | 0.93204945  |
| USF35 | AB37793_361436_r   | ACCTAAAAGGACAGARGATTCGCAAAATCTCTTGAATTCCTGGACATCTTGTCCGG | HL31349  | 14477 | 1.02285    | 0.13216414 | 0.00216547  | -0.0841235  | 0.45571725  | 0.73445512  |
| USF35 | AB37793_361437_r   | ACCTAAAAGGACAGARGATTCGCAAAATCTCTTGAATTCCTGGACATCTTGTCCGG | HL31349  | 12177 | 0.10749625 | 0.00000000 | 0.00000000  | 0.0000000   | 0.0000000   | 0.0000000   |
| USF35 | AB37793_361438_r   | ACCTAAAAGGAGGGGGTGTGAGAGAGATCTCTTGATTCATCTCAAGCCCTCCGG   | HL31349  | 9103  | 0.177275   | 0.34971546 | 0.39819081  | 0.3053759   | 0.21894655  | 0.17462529  |
| USF35 | AB37793_361439_r   | ACCTAAAAGGAGGGGGTGTGAGAGAGATCTCTTGATTCATCTCAAGCCCTCCGG   | HL31349  | 14479 | 0.177275   | 0.29329734 | 0.03959071  | 0.2328875   | 0.22246131  | 0.28173002  |
| USF35 | AB37793_361440_r   | ACCTAAAAGGAGGGGGTGTGAGAGAGATCTCTTGATTCATCTCAAGCCCTCCGG   | HL31349  | 3743  | 0.4448425  | 0.20232114 | 0.112591643 | -0.34464752 | 0.157198463 | 0.020838148 |
| USF36 | AB40808_3612078_r  | ACCTAAAAGGACAGAGATTCGCAAAATCTCTTGAATTCCTGGACATCTTGTCCGG  | HL464243 | 9119  | 0.134075   | 0.5908708  | 0.2837039   | -0.5378375  | 0.13901851  | 0.02735808  |
| USF36 | AB40808_3612079_r  | ACCTAAAAGGACAGAGATTCGCAAAATCTCTTGAATTCCTGGACATCTTGTCCGG  | HL464243 | 9120  | 0.4736     | 0.14991154 | 0.174301163 | 0.4736      | 0.15009304  | 0.0423199   |
| USF36 | AB40808_3612080_r  | ACCTAAAAGGACAGAGATTCGCAAAATCTCTTGAATTCCTGGACATCTTGTCCGG  | HL464243 | 3741  | -0.04375   | 0.49911554 | 0.12106343  | -0.0254875  | 0.13815414  | 0.09776344  |
| USF36 | AB40808_3612081_r  | ACCTAAAAGGACAGAGATTCGCAAAATCTCTTGAATTCCTGGACATCTTGTCCGG  | HL464243 | 9117  | 0.0000000  | 0.00000000 | 0.00000000  | 0.0000000   | 0.2328875   | 0.0493129   |
| USF36 | AB40808_3612082_r  | ACCTAAAAGGACAGAGATTCGCAAAATCTCTTGAATTCCTGGACATCTTGTCCGG  | HL464243 | 14493 | 0.079675   | 0.0377761  | 0.809727201 | 0.3987625   | 0.3525264   | 0.01818386  |
| USF36 | AB40808_3612083_r  | ACCTAAAAGGACAGAGATTCGCAAAATCTCTTGAATTCCTGGACATCTTGTCCGG  | HL464243 | 3739  | -0.17375   | 0.3480562  | 0.49418992  | 0.313121    | 0.2541261   | 0.16421041  |
| USF36 | AB40808_3612084_r  | ACCTAAAAGGACAGAGATTCGCAAAATCTCTTGAATTCCTGGACATCTTGTCCGG  | HL464243 | 9115  | 0.01945    | 0.4543229  | 0.93247682  | 0.4544626   | 0.3053761   | 0.16607877  |
| USF36 | AB40808_3612085_r  | ACCTAAAAGGACAGAGATTCGCAAAATCTCTTGAATTCCTGGACATCTTGTCCGG  | HL464243 | 14491 | 0.01315    | 0.1878464  | 0.74319559  | 0.252862    | 0.8346355   | 0.04827878  |
| USF37 | BX33804_361909_r   | ACCTAAAAGGACAGAGATTCGCAAAATCTCTTGAATTCCTGGACATCTTGTCCGG  | HL36608  | 4302  | 0.36925    | 0.5966387  | 0.22254454  | 0.132       | 0.3654632   | 0.63383192  |
| USF37 | BX33804_361909_r   | ACCTAAAAGGACAGAGATTCGCAAAATCTCTTGAATTCCTGGACATCTTGTCCGG  | HL36608  | 9678  | 0.026875   | 0.6820183  | 0.93714723  | -0.29925    | 0.0954852   | 0.08807756  |
| USF37 | BX33804_361910_r   | ACCTAAAAGGACAGAGATTCGCAAAATCTCTTGAATTCCTGGACATCTTGTCCGG  | HL36608  | 4298  | 0.00653333 | 0.7015862  | 0.98519433  | 0.474125    | 0.1548482   | 0.1608803   |
| USF37 | BX33804_361911_r   | ACCTAAAAGGACAGAGATTCGCAAAATCTCTTGAATTCCTGGACATCTTGTCCGG  | HL36608  | 9674  | -0.11215   | 0.0071037  | 0.7252845   | 0.0000000   | 0.0000000   | 0.0000000   |
| USF37 | BX33804_361912_r   | ACCTAAAAGGACAGAGATTCGCAAAATCTCTTGAATTCCTGGACATCTTGTCCGG  | HL36608  | 15050 | 0.12145    | 0.72051107 | 0.52235845  | 0.475282    | 0.495288    | 0.1604999   |
| USF37 | BX33804_361913_r   | ACCTAAAAGGACAGAGATTCGCAAAATCTCTTGAATTCCTGGACATCTTGTCCGG  | HL36608  | 4300  | -0.24375   | 0.3997904  | 0.25567198  | 0.0285      | 0.155882    | 0.9138653   |
| USF37 | BX33804_361914_r   | ACCTAAAAGGACAGAGATTCGCAAAATCTCTTGAATTCCTGGACATCTTGTCCGG  | HL36608  | 9676  | -0.2035    | 0.4274908  | 0.3696468   | 0.1183      | 0.3863354   | 0.76000202  |
| USF37 | BX33804_361915_r   | ACCTAAAAGGACAGAGATTCGCAAAATCTCTTGAATTCCTGGACATCTTGTCCGG  | HL36608  | 15052 | 0.778      | 0.2426097  | 0.0759363   | 0.071725    | 0.193207    | 0.6751194   |
| USF38 | NM_032557_361692_r | ACCTAAAAGGACAGAGATTCGCAAAATCTCTTGAATTCCTGGACATCTTGTCCGG  | HL48048  | 9091  | 0.986825   | 0.6179191  | 0.01295587  | 0.782335    | 0.5120305   | 0.00029048  |
| USF38 | NM_032557_361693_r | ACCTAAAAGGACAGAGATTCGCAAAATCTCTTGAATTCCTGGACATCTTGTCCGG  | HL48048  | 14487 | 1.294245   | 0.4642004  | 0.00467707  | 1.43443333  | 0.9940249   | 0.01401142  |
| USF38 | NM_032557_361694_r | ACCTAAAAGGACAGAGATTCGCAAAATCTCTTGAATTCCTGGACATCTTGTCCGG  | HL48048  | 3717  | -1.25925   | 0.2039721  | 0.00004767  | -0.3222375  | 0.2039721   | 0.13977562  |
| USF38 | NM_032557_361695_r | ACCTAAAAGGACAGAGATTCGCAAAATCTCTTGAATTCCTGGACATCTTGTCCGG  | HL48048  | 9093  | 1.2625     | 0.4902237  | 0.00480648  | -0.387175   | 0.251247    | 0.10170757  |
| USF38 | NM_032557_361696_r | ACCTAAAAGGACAGAGATTCGCAAAATCTCTTGAATTCCTGGACATCTTGTCCGG  | HL48048  | 14489 | -1.05475   | 0.2634595  | 0.00141294  | -0.941375   | 0.1415822   | 0.02703541  |
| USF38 | NM_032557_361697_r | ACCTAAAAGGACAGAGATTCGCAAAATCTCTTGAATTCCTGGACATCTTGTCCGG  | HL48048  | 3713  | -1.24525   | 0.4102905  | 0.00174592  | -0.371725   | 0.2675858   | 0.11473493  |
| USF38 | NM_032557_361698_r | ACCTAAAAGGACAGAGATTCGCAAAATCTCTTGAATTCCTGGACATCTTGTCCGG  | HL48048  | 9089  | 0.1313     | 0.2308197  | 0.00012809  | -0.1049626  | 0.4348864   | 0.73059504  |
| USF38 | NM_032557_361699_r | ACCTAAAAGGACAGAGATTCGCAAAATCTCTTGAATTCCTGGACATCTTGTCCGG  | HL48048  | 14485 | -1.03825   | 0.3356787  | 0.00237026  | -1.00048    | 0.4332975   | 0.4726137   |
| USF38 | NM_032557_361700_r | ACCTAAAAGGACAGAGATTCGCAAAATCTCTTGAATTCCTGGACATCTTGTCCGG  | HL48048  | 4091  | 0.2464025  | 1.068373   | 0.00211172  | 0.173235    | 0.30579416  | 0.00013908  |
| USF38 | NM_032557_361701_r | ACCTAAAAGGACAGAGATTCGCAAAATCTCTTGAATTCCTGGACATCTTGTCCGG  | HL48048  | 46913 | 1.457      | 0.2457075  | 1.11710251  | 0.20282183  | 0.21023     | 0.00126874  |
| USF38 | NM_032557_361702_r | ACCTAAAAGGACAGAGATTCGCAAAATCTCTTGAATTCCTGGACATCTTGTCCGG  | HL48048  | 4092  | 0.50320    | 0.4642004  | 0.00467707  | 0.782335    | 0.5120305   | 0.00029048  |
| USF38 | NM_032557_361703_r | ACCTAAAAGGACAGAGATTCGCAAAATCTCTTGAATTCCTGGACATCTTGTCCGG  | HL48048  | 4039  | -0.9995    | 0.4303556  | 0.2428215   | -0.67225    | 0.3146789   | 0.0210223   |
| USF38 | NM_032557_361704_r | ACCTAAAAGGACAGAGATTCGCAAAATCTCTTGAATTCCTGGACATCTTGTCCGG  | HL48048  | 9415  | -0.345     | 0.5601699  | 0.0648008   | -0.41705    | 0.299465    | 0.0243096   |
| USF38 | NM_032557_361705_r | ACCTAAAAGGACAGAGATTCGCAAAATCTCTTGAATTCCTGGACATCTTGTCCGG  | HL48048  | 14791 | 1.207      | 0.0000000  | 0.0000000   | 0.71242     | 0.164626    | 0.91416018  |
| USF38 | NM_032557_361706_r | ACCTAAAAGGACAGAGATTCGCAAAATCTCTTGAATTCCTGGACATCTTGTCCGG  | HL48048  | 4043  | -0.1415265 | 1.2096373  | 0.78219509  | -0.448775   | 0.3470377   | 0.06518782  |
| USF38 | NM_032557_361707_r | ACCTAAAAGGACAGAGATTCGCAAAATCTCTTGAATTCCTGGACATCTTGTCCGG  | HL48048  | 9419  | 0.826325   | 0.26313    | 0.00380067  | 0.4508375   | 0.2928      | 0.0000000   |
| USF38 | NM_032557_361708_r | ACCTAAAAGGACAGAGATTCGCAAAATCTCTTGAATTCCTGGACATCTTGTCCGG  | HL48048  | 46913 | 1.4795     | -0.799125  | 0.3548883   | 0.08095710  | 1.048215    | 0.5571299   |
| USF39 | AG57698_362877_r   | ACCTAAAAGGACAGAGATTCGCAAAATCTCTTGAATTCCTGGACATCTTGTCCGG  | HL7500   | 1415  | 0.8198     | 0.073258   | 0.00000000  | 0.0000000   | 0.0000000   | 0.0000000   |
| USF39 | AG57698_362878_r   | ACCTAAAAGGACAGAGATTCGCAAAATCTCTTGAATTCCTGGACATCTTGTCCGG  | HL7500   | 8521  | -0.80425   | 0.0989439  | 0.00191748  | 0.948235    | 0.7897211   | 0.02755144  |
| USF39 | AG57698_362879_r   | ACCTAAAAGGACAGAGATTCGCAAAATCTCTTGAATTCCTGGACATCTTGTCCGG  | HL7500   | 13987 | -0.174     | 0.0312011  | 0.0001667   | -0.901225   | 0.820790    | 0.03899181  |
| USF39 | AG57698_362880_r   | ACCTAAAAGGACAGAGATTCGCAAAATCTCTTGAATTCCTGGACATCTTGTCCGG  | HL7500   | 3147  | 1.8975     | 0.2993035  | 0.00109239  | 1.8975      | 0.0277476   | 0.05195768  |
| USF39 | AG57698_362881_r   | ACCTAAAAGGACAGAGATTCGCAAAATCTCTTGAATTCCTGGACATCTTGTCCGG  | HL7500   | 8523  | 1.88465    | 0.2830884  | 0.00010073  | 2.481       | 0.9718946   | 0.00019508  |
| USF39 | AG57698_362882_r   | ACCTAAAAGGACAGAGATTCGCAAAATCTCTTGAATTCCTGGACATCTTGTCCGG  | HL7500   | 13989 | 0.34025    | 0.2942962  | 0.00000000  | 0.0000000   | 0.0000000   | 0.0000000   |
| USF39 | AG57698_362883_r   | ACCTAAAAGGACAGAGATTCGCAAAATCTCTTGAATTCCTGGACATCTTGTCCGG  | HL7500   | 96513 | 0.3836     | 0.373625   | 0.2962902   | 0.08273185  | 0.7122      | 0.05195768  |
| USF39 | AG57698_362884_r   | ACCTAAAAGGACAGAGATTCGCAAAATCTCTTGAATTCCTGGACATCTTGTCCGG  | HL7500   | 912   | 0.1588     | 0.1366444  | 0.00000000  | 0.4308375   | 0.2928      | 0.0000000   |
| USF40 | AI58321_361495_r   | ACCTAAAAGGACAGAGATTCGCAAAATCTCTTGAATTCCTGGACATCTTGTCCGG  | HL9613   | 14588 | 0.4806875  | 0.6707592  | 0.1917376   | 0.704775    | 0.2014892   | 0.01639697  |
| USF40 | AI58321_361496_r   | ACCTAAAAGGACAGAGATTCGCAAAATCTCTTGAATTCCTGGACATCTTGTCCGG  | HL9613   | 3828  | 0.1588     | 0.1366444  | 0.00000000  | 0.4308375   | 0.2928      | 0.0000000   |
| USF40 | AI58321_361497_r   | ACCTAAAAGGACAGAGATTCGCAAAATCTCTTGAATTCCTGGACATCTTGTCCGG  | HL9613   | 9210  | 0.0934125  | 0.6187588  | 0.7467386   | -0.0686     | 0.4570038   | 0.78564415  |
| USF40 | AI58321_361498_r   | ACCTAAAAGGACAGAGATTCGCAAAATCTCTTGAATTCCTGGACATCTTGTCCGG  | HL9613   | 14588 | 0.4806875  | 0.6707592  | 0.1917376   | 0.704775    | 0.2014892   | 0.01639697  |
| USF40 | AI58321_361499_r   | ACCTAAAAGGACAGAGATTCGCAAAATCTCTTGAATTCCTGGACATCTTGTCCGG  | HL9613   | 3828  | 0.1588     | 0.1366444  | 0.00000000  | 0.4308375   | 0.2928      | 0.0000000   |
| USF40 | AI58321_361500_r   | ACCTAAAAGGACAGAGATTCGCAAAATCTCTTGAATTCCTGGACATCTTGTCCGG  | HL9613   | 9210  | 0.0934125  | 0.6187588  | 0.7467386   | -0.0686     | 0.4570038   | 0.78564415  |
| USF40 | AI58321_361501_r   | ACCTAAAAGGACAGAGATTCGCAAAATCTCTTGAATTCCTGGACATCTTGTCCGG  | HL9613   | 3828  | 0.1588     | 0.1366444  | 0.00000000  | 0.4308375   | 0.2928      | 0.0000000   |
| USF40 | AI58321_361502_r   | ACCTAAAAGGACAGAGATTCGCAAAATCTCTTGAATTCCTGGACATCTTGTCCGG  | HL9613   | 9210  | 0.0934125  | 0.6187588  | 0.7467386   | -0.0686     | 0.4570038   | 0.78564415  |
| USF40 | AI58321_361503_r   | ACCTAAAAGGACAGAGATTCGCAAAATCTCTTGAATTCCTGGACATCTTGTCCGG  | HL9613   | 3828  | 0.1588     | 0.1366444  | 0.00000000  | 0.4308375   | 0.2928      | 0.0000000   |
| USF40 | AI58321_361504_r   | ACCTAAAAGGACAGAGATTCGCAAAATCTCTTGAATTCCTGGACATCTTGTCCGG  | HL9613   | 9210  | 0.0934125  | 0.6187588  | 0.7467386   | -0.0686     | 0.4570038   | 0.78564415  |
| USF40 | AI58321_361505_r   | ACCTAAAAGGACAGAGATTCGCAAAATCTCTTGAATTCCTGGACATCTTGTCCGG  | HL9613   | 3828  | 0.1588     | 0.1366444  | 0.00000000  | 0.4308375   | 0.2928      | 0.0000000   |
| USF40 | AI58321_361506_r   | ACCTAAAAGGACAGAGATTCGCAAAATCTCTTGAATTCCTGGACATCTTGTCCGG  | HL9613   | 9210  | 0.0934125  | 0.6187588  | 0.7467386   | -0.0686     | 0.4570038   | 0.78564415  |
| USF40 | AI58321_361507_r   | ACCTAAAAGGACAGAGATTCGCAAAATCTCTTGAATTCCTGGACATCTTGTCCGG  | HL9613   | 3828  | 0.1588     | 0.1366444  | 0.00000000  | 0.4308375   | 0.2928      | 0.0000000   |
| USF40 | AI58321_361508_r   | ACCTAAAAGGACAGAGATTCGCAAAATCTCTTGAATTCCTGGACATCTTGTCCGG  | HL9613   | 9210  | 0.0934125  | 0.6187588  | 0.7467386   | -0.0686     | 0.4570038   | 0.78564415  |
| USF40 | AI58321_361509_r   | ACCTAAAAGGACAGAGATTCGCAAAATCTCTTGAATTCCTGGACATCTTGTCCGG  | HL9613   | 3828  | 0.1588     | 0.1366444  | 0.00000000  | 0.4308375   | 0.2928      | 0.0000000   |
| USF40 | AI58321_361510_r   | ACCTAAAAGGACAGAGATTCGCAAAATCTCTTGAATTCCTGGACATCTTGTCCGG  | HL9613   | 9210  | 0.0934125  | 0.6187588  | 0.7467386   | -0.0686     | 0.4570038   | 0.78564415  |
| USF40 | AI58321_361511_r   | ACCTAAAAGGACAGAGATTCGCAAAATCTCTTGAATTCCTGGACATCTTGTCCGG  | HL9613   | 3828  | 0.1588     | 0.1366444  | 0.00000000  | 0.4308375   | 0.2928      | 0.0000000   |
| USF40 | AI58321_361512_r   | ACCTAAAAGGACAGAGATTCGCAAAATCTCTTGAATTCCTGGACATCTTGTCCGG  | HL9613   | 9210  | 0.0934125  | 0.6187588  | 0.7467386   | -0.0686     | 0.4570038   | 0.78564415  |
| USF40 | AI58321_361513_r   | ACCTAAAAGGACAGAGATTCGCAAAATCTCTTGAATTCCTGGACATCTTGTCCGG  | HL9613   | 3828  | 0.1588     | 0.1366444  | 0.00000000  | 0.4308375   | 0.2928      | 0.0000000   |
| USF40 | AI58321_361514_r   | ACCTAAAAGGACAGAGATTCGCAAAATCTCTTGAATTCCTGGACATCTTGTCCGG  | HL9613   | 9210  | 0.0934125  | 0.6187588  | 0.7467386   | -0.0686     | 0.4570038   | 0.78564415  |
| USF40 | AI58321_361515_r   | ACCTAAAAGGACAGAGATTCGCAAAATCTCTTGAATTCCTGGACATCTTGTCCGG  | HL9613   | 3828  | 0.1588     | 0.1366444  | 0.00000000  | 0.4308375   | 0.2928      | 0.0000000   |
| USF40 | AI58321_361516_r   | ACCTAAAAGGACAGAGATTCGCAAAATCTCTTGAATTCCTGGACATCTTGTCCGG  | HL9613   | 9210  | 0.0934125  | 0.6187588  | 0.7467386   | -0.0686     | 0.4570038   | 0.78564415  |
| USF40 | AI58321_361517_r   | ACCTAAAAGGACAGAGATTCGCAAAATCTCTTGAATTCCTGGACATCTTGTCCGG  | HL9613   | 3828  | 0.1588     | 0.1366444  | 0.00000000  | 0.4308375   | 0.2928      | 0.0000000   |
| USF40 | AI58321_361518_r   | ACCTAAAAGGACAGAGATTCGCAAAATCTCTTGAATTCCTGGACATCTTGTCCGG  | HL9613   | 9210  | 0.0934125  | 0.6187588  | 0.7467386   | -0.0686     | 0.4570038   | 0.78564415  |
| USF40 | AI58321_361519_r   | ACCTAAAAGGACAGAGATTCGCAAAATCTCTTGAATTCCTGGACATCTTGTCCGG  | HL9613   | 3828  | 0.1588     | 0.1366444  | 0.00000000  | 0.4308375   |             |             |
